# Supplementary material
Source: ML conference proceedings conference paper supplement (https://aclanthology.org/P16-1187)
Supplement: Notes [file P16-1187.Notes.zip]

## Sheet: README
Our name	Paper name	Eval meas	Remarks
En-reddy	Reddy	spearman	Original dataset, comparable with state-of-the-art
En-ours90	-- not reported --	spearman	New data gathered for our paper, not published yet
En-ours90	Reddy++	spearman	Reddy + Ours90
En-farahmand	Farahmand	bf1	Original dataset, comparable with state-of-the-art
Fr-ours	FR-comp	spearman	New data gathered for our paper, not published yet
Strict eval – dataset name in sheets preceded by x

## Sheet: en-reddy
weight	language	dataset	model	submodel	dimensions	lemmatype	window	pearson	spearman	kendall	bf1	avgprec	prec@	ndcg	misssingle	misscompound	dataset	pearson	spearman	kendall	bf1	avgprec	prec@	ndcg	misssingle	misscompound
50-50	en	reddy	word2vec.avg	cbow	250	lemma	1	0.732477	0.712393	0.509503	0.828647	0.90309	0.86667	0.980587	0	0	xreddy89	0.731887	0.71547	0.51168	0.828647	0.904583	0.86667	0.980903	0	0
50-50	en	reddy	word2vec.avg	cbow	250	lemma	4	0.732867	0.723077	0.51951	0.8174	0.90985	0.92222	0.982037	0	0	xreddy89	0.73312	0.725803	0.521913	0.819423	0.91091	0.92222	0.98226	0	0
50-50	en	reddy	word2vec.avg	cbow	250	lemma	8	0.742493	0.734733	0.530013	0.82615	0.910137	0.93333	0.98201	0	0	xreddy89	0.742447	0.73687	0.5318	0.828663	0.911023	0.93333	0.982197	0	0
50-50	en	reddy	word2vec.avg	cbow	250	lemmapos	1	0.745667	0.731607	0.52195	0.81566	0.912707	0.91111	0.9827	3	0	xreddy89	0.747317	0.735943	0.525087	0.81843	0.914513	0.91111	0.983083	3	0
50-50	en	reddy	word2vec.avg	cbow	250	lemmapos	4	0.74453	0.746227	0.53852	0.844193	0.91516	0.9	0.983153	3	0	xreddy89	0.745943	0.749097	0.540327	0.844193	0.916287	0.9	0.983393	3	0
50-50	en	reddy	word2vec.avg	cbow	250	lemmapos	8	0.750187	0.754107	0.54936	0.860317	0.91809	0.92222	0.9837	3	0	xreddy89	0.750413	0.755363	0.54919	0.860317	0.918693	0.92222	0.983833	3	0
50-50	en	reddy	word2vec.avg	cbow	250	surface	1	0.766133	0.755257	0.545857	0.841747	0.929017	0.955557	0.98612	0	1	xreddy89	0.770133	0.76322	0.553453	0.85007	0.93258	0.955557	0.986853	0	0
50-50	en	reddy	word2vec.avg	cbow	250	surface	4	0.759643	0.75372	0.547023	0.855063	0.921783	0.9	0.98446	0	1	xreddy89	0.76361	0.759927	0.552773	0.863677	0.924423	0.9	0.984997	0	0
50-50	en	reddy	word2vec.avg	cbow	250	surface	8	0.754933	0.744087	0.53702	0.824773	0.91409	0.91111	0.982927	0	1	xreddy89	0.75887	0.751177	0.543563	0.83409	0.917267	0.91111	0.98359	0	0
50-50	en	reddy	word2vec.avg	cbow	250	surface@stoppy	1	0.77119	0.763223	0.545857	0.85	0.925437	0.955557	0.98544	0	1	xreddy89	0.775217	0.77029	0.553283	0.85	0.928143	0.955557	0.986013	0	0
50-50	en	reddy	word2vec.avg	cbow	250	surface@stoppy	4	0.759033	0.758887	0.549027	0.83333	0.922517	0.93333	0.98483	0	1	xreddy89	0.762993	0.764713	0.555157	0.83333	0.9248	0.93333	0.985313	0	0
50-50	en	reddy	word2vec.avg	cbow	250	surface@stoppy	8	0.759937	0.762633	0.554863	0.826627	0.91905	0.92222	0.984043	0	1	xreddy89	0.763903	0.769007	0.560787	0.833377	0.92185	0.92222	0.984627	0	0
50-50	en	reddy	word2vec.avg	cbow	750	lemma	1	0.780837	0.780857	0.571703	0.84989	0.93085	0.93333	0.986537	0	0	xreddy89	0.77994	0.782217	0.57306	0.84989	0.931257	0.93333	0.98662	0	0
50-50	en	reddy	word2vec.avg	cbow	750	lemma	4	0.795687	0.781707	0.570143	0.851637	0.931533	0.944443	0.986657	0	0	xreddy89	0.79497	0.783157	0.571467	0.851637	0.931973	0.944443	0.986753	0	0
50-50	en	reddy	word2vec.avg	cbow	750	lemma	8	0.787797	0.772213	0.564867	0.852193	0.926043	0.93333	0.98547	0	0	xreddy89	0.78711	0.773593	0.56641	0.852193	0.92638	0.93333	0.985543	0	0
50-50	en	reddy	word2vec.avg	cbow	750	lemmapos	1	0.795607	0.766383	0.55653	0.83249	0.92918	0.944443	0.986243	3	0	xreddy89	0.795903	0.769817	0.559423	0.83321	0.930497	0.944443	0.98652	3	0
50-50	en	reddy	word2vec.avg	cbow	750	lemmapos	4	0.797237	0.76797	0.560363	0.865617	0.933307	0.955557	0.987023	3	0	xreddy89	0.79738	0.770673	0.56181	0.865617	0.93406	0.955557	0.987187	3	0
50-50	en	reddy	word2vec.avg	cbow	750	lemmapos	8	0.802293	0.777373	0.570873	0.872187	0.938533	0.955557	0.988067	3	0	xreddy89	0.802547	0.780463	0.572893	0.872187	0.939383	0.955557	0.98825	3	0
50-50	en	reddy	word2vec.avg	cbow	750	surface	1	0.80278	0.793447	0.58471	0.879183	0.942927	0.955557	0.989013	0	1	xreddy89	0.806967	0.802467	0.59369	0.889573	0.94716	0.955557	0.989853	0	0
50-50	en	reddy	word2vec.avg	cbow	750	surface	4	0.804317	0.79197	0.583873	0.86484	0.943557	0.96667	0.98919	0	1	xreddy89	0.808517	0.800433	0.592327	0.874997	0.94709	0.96667	0.989897	0	0
50-50	en	reddy	word2vec.avg	cbow	750	surface	8	0.79983	0.780417	0.57204	0.85395	0.935367	0.96667	0.987503	0	1	xreddy89	0.804003	0.789653	0.581077	0.86342	0.939623	0.96667	0.988367	0	0
50-50	en	reddy	word2vec.avg	cbow	750	surface@stoppy	1	0.800693	0.79061	0.58304	0.859167	0.936893	0.96667	0.987813	0	1	xreddy89	0.804873	0.799283	0.591987	0.864093	0.94054	0.96667	0.98856	0	0
50-50	en	reddy	word2vec.avg	cbow	750	surface@stoppy	4	0.79868	0.77961	0.571537	0.85832	0.936367	0.98889	0.987713	0	1	xreddy89	0.80285	0.788463	0.580393	0.865507	0.939967	0.98889	0.98845	0	0
50-50	en	reddy	word2vec.avg	cbow	750	surface@stoppy	8	0.791093	0.77077	0.559197	0.85467	0.93316	0.96667	0.98703	0	1	xreddy89	0.79522	0.779427	0.567777	0.864287	0.93649	0.96667	0.987717	0	0
50-50	en	reddy	word2vec.avg	cbow	500	lemma	1	0.767623	0.763187	0.55453	0.833677	0.920537	0.91111	0.984363	0	0	xreddy89	0.766237	0.763087	0.553797	0.833677	0.920807	0.91111	0.984423	0	0
50-50	en	reddy	word2vec.avg	cbow	500	lemma	4	0.78219	0.766963	0.55553	0.8422	0.928493	0.93333	0.98601	0	0	xreddy89	0.78175	0.769267	0.558227	0.8422	0.929	0.93333	0.986117	0	0
50-50	en	reddy	word2vec.avg	cbow	500	lemma	8	0.778667	0.76223	0.55153	0.837753	0.926093	0.93333	0.98548	0	0	xreddy89	0.778627	0.764373	0.554303	0.837753	0.926533	0.93333	0.98557	0	0
50-50	en	reddy	word2vec.avg	cbow	500	lemmapos	1	0.7803	0.750187	0.538793	0.834263	0.922197	0.93333	0.98473	3	0	xreddy89	0.782163	0.755007	0.542987	0.837287	0.924053	0.93333	0.98512	3	0
50-50	en	reddy	word2vec.avg	cbow	500	lemmapos	4	0.779897	0.758693	0.550027	0.844753	0.928403	0.933333	0.985993	3	0	xreddy89	0.780153	0.76065	0.550723	0.844753	0.928947	0.933333	0.98611	3	0
50-50	en	reddy	word2vec.avg	cbow	500	lemmapos	8	0.782753	0.75883	0.54919	0.86861	0.931633	0.93333	0.986613	3	0	xreddy89	0.783423	0.76142	0.551237	0.86861	0.93227	0.93333	0.98675	3	0
50-50	en	reddy	word2vec.avg	cbow	500	surface	1	0.803563	0.80058	0.59805	0.88378	0.945143	0.96667	0.98941	0	1	xreddy89	0.807757	0.809757	0.60716	0.893827	0.949253	0.96667	0.990227	0	0
50-50	en	reddy	word2vec.avg	cbow	500	surface	4	0.795627	0.779357	0.57137	0.860083	0.937033	0.96667	0.987807	0	1	xreddy89	0.79978	0.788377	0.580053	0.86944	0.94119	0.96667	0.98865	0	0
50-50	en	reddy	word2vec.avg	cbow	500	surface	8	0.783483	0.762937	0.555197	0.85533	0.930413	0.93333	0.986413	0	1	xreddy89	0.78757	0.77155	0.563517	0.864983	0.934267	0.93333	0.987197	0	0
50-50	en	reddy	word2vec.avg	cbow	500	surface@stoppy	1	0.79654	0.791353	0.579373	0.866907	0.93803	0.96667	0.98805	0	1	xreddy89	0.8007	0.799443	0.587893	0.866907	0.941237	0.96667	0.98871	0	0
50-50	en	reddy	word2vec.avg	cbow	500	surface@stoppy	4	0.791317	0.777263	0.569037	0.835977	0.932197	0.97778	0.986873	0	1	xreddy89	0.79545	0.78602	0.577493	0.843767	0.93606	0.97778	0.987677	0	0
50-50	en	reddy	word2vec.avg	cbow	500	surface@stoppy	8	0.783957	0.770647	0.560697	0.847727	0.929607	0.96667	0.98627	0	1	xreddy89	0.78805	0.778393	0.56846	0.855953	0.932687	0.96667	0.986913	0	0
50-50	en	reddy	word2vec.avg	skipgram	250	lemma	1	0.735073	0.71236	0.506503	0.828647	0.90307	0.9	0.980597	0	0	xreddy89	0.73462	0.715743	0.508783	0.828647	0.904693	0.9	0.980947	0	0
50-50	en	reddy	word2vec.avg	skipgram	250	lemma	4	0.738167	0.731507	0.526347	0.82005	0.91237	0.93333	0.982567	0	0	xreddy89	0.738123	0.733797	0.528387	0.82232	0.913237	0.93333	0.982757	0	0
50-50	en	reddy	word2vec.avg	skipgram	250	lemma	8	0.740653	0.7334	0.528347	0.825647	0.908037	0.92222	0.98157	0	0	xreddy89	0.74065	0.735123	0.529753	0.825647	0.908697	0.92222	0.98171	0	0
50-50	en	reddy	word2vec.avg	skipgram	250	lemmapos	1	0.74929	0.73843	0.52868	0.824897	0.91063	0.9	0.982207	3	0	xreddy89	0.750447	0.742493	0.531457	0.82598	0.912383	0.9	0.982587	3	0
50-50	en	reddy	word2vec.avg	skipgram	250	lemmapos	4	0.74427	0.744337	0.53896	0.82667	0.91444	0.91111	0.983027	3	0	xreddy89	0.74566	0.747557	0.541283	0.82849	0.915607	0.91111	0.983273	3	0
50-50	en	reddy	word2vec.avg	skipgram	250	lemmapos	8	0.748213	0.75211	0.546027	0.859193	0.920567	0.92222	0.98427	3	0	xreddy89	0.748587	0.75361	0.54595	0.859193	0.921183	0.92222	0.984403	3	0
50-50	en	reddy	word2vec.avg	skipgram	250	surface	1	0.772317	0.763973	0.55453	0.85236	0.931293	0.944443	0.986547	0	1	xreddy89	0.77635	0.771827	0.562317	0.85922	0.934633	0.944443	0.987227	0	0
50-50	en	reddy	word2vec.avg	skipgram	250	surface	4	0.762347	0.75773	0.55086	0.849803	0.922627	0.93333	0.984737	0	1	xreddy89	0.76633	0.764603	0.556693	0.859247	0.925657	0.93333	0.985357	0	0
50-50	en	reddy	word2vec.avg	skipgram	250	surface	8	0.751483	0.7448	0.53652	0.83017	0.913487	0.91111	0.982787	0	1	xreddy89	0.755403	0.751447	0.542713	0.839677	0.916367	0.91111	0.983387	0	0
50-50	en	reddy	word2vec.avg	skipgram	250	surface@stoppy	1	0.775563	0.76975	0.55236	0.859553	0.929553	0.96667	0.9863	0	1	xreddy89	0.77961	0.776947	0.559933	0.859553	0.9323	0.96667	0.986877	0	0
50-50	en	reddy	word2vec.avg	skipgram	250	surface@stoppy	4	0.761947	0.76128	0.55303	0.829057	0.922317	0.92222	0.984783	0	1	xreddy89	0.765923	0.76722	0.55874	0.830467	0.924777	0.92222	0.985303	0	0
50-50	en	reddy	word2vec.avg	skipgram	250	surface@stoppy	8	0.75635	0.757083	0.551523	0.824093	0.917567	0.92222	0.98375	0	1	xreddy89	0.7603	0.76398	0.558227	0.83346	0.920493	0.92222	0.984363	0	0
50-50	en	reddy	word2vec.avg	skipgram	750	lemma	1	0.773527	0.772497	0.565367	0.84994	0.92598	0.93333	0.985443	0	0	xreddy89	0.772647	0.774027	0.567263	0.84994	0.926463	0.93333	0.985547	0	0
50-50	en	reddy	word2vec.avg	skipgram	750	lemma	4	0.79489	0.776737	0.5662	0.85269	0.93119	0.944443	0.98658	0	0	xreddy89	0.79419	0.778627	0.567773	0.85269	0.931683	0.944443	0.986687	0	0
50-50	en	reddy	word2vec.avg	skipgram	750	lemma	8	0.79171	0.776273	0.567033	0.84904	0.930203	0.93333	0.986327	0	0	xreddy89	0.791117	0.777973	0.56897	0.84904	0.930463	0.93333	0.986383	0	0
50-50	en	reddy	word2vec.avg	skipgram	750	lemmapos	1	0.78777	0.75996	0.54819	0.84116	0.93063	0.93333	0.986543	3	0	xreddy89	0.787783	0.762523	0.550043	0.84116	0.931543	0.93333	0.986733	3	0
50-50	en	reddy	word2vec.avg	skipgram	750	lemmapos	4	0.800483	0.771783	0.56453	0.86231	0.937493	0.96667	0.987897	3	0	xreddy89	0.800543	0.7742	0.565903	0.86231	0.938107	0.96667	0.98803	3	0
50-50	en	reddy	word2vec.avg	skipgram	750	lemmapos	8	0.8023	0.77846	0.570203	0.871147	0.938907	0.955557	0.988177	3	0	xreddy89	0.802527	0.78136	0.572547	0.871147	0.93954	0.955557	0.988317	3	0
50-50	en	reddy	word2vec.avg	skipgram	750	surface	1	0.81021	0.804027	0.594713	0.896527	0.946897	0.944443	0.98978	0	1	xreddy89	0.814437	0.813633	0.60409	0.906953	0.951537	0.944443	0.990693	0	0
50-50	en	reddy	word2vec.avg	skipgram	750	surface	4	0.804623	0.788963	0.57704	0.866627	0.947093	0.97778	0.98992	0	1	xreddy89	0.80882	0.797597	0.585507	0.87636	0.9507	0.97778	0.990643	0	0
50-50	en	reddy	word2vec.avg	skipgram	750	surface	8	0.795867	0.77639	0.567533	0.85424	0.934277	0.96667	0.98726	0	1	xreddy89	0.80002	0.78549	0.5763	0.863497	0.93834	0.96667	0.988087	0	0
50-50	en	reddy	word2vec.avg	skipgram	750	surface@stoppy	1	0.80244	0.79343	0.583483	0.874843	0.9393	0.96667	0.98829	0	1	xreddy89	0.806627	0.801883	0.59227	0.881437	0.942367	0.96667	0.98892	0	0
50-50	en	reddy	word2vec.avg	skipgram	750	surface@stoppy	4	0.803067	0.788373	0.57904	0.858393	0.93917	0.98889	0.98829	0	1	xreddy89	0.807253	0.79644	0.587383	0.86529	0.94229	0.98889	0.988927	0	0
50-50	en	reddy	word2vec.avg	skipgram	750	surface@stoppy	8	0.791103	0.77398	0.565033	0.845513	0.93083	0.96667	0.986553	0	1	xreddy89	0.795233	0.783103	0.573917	0.855953	0.934893	0.96667	0.987387	0	0
50-50	en	reddy	word2vec.avg	skipgram	500	lemma	1	0.763717	0.747013	0.53902	0.825453	0.918903	0.92222	0.98399	0	0	xreddy89	0.762623	0.747627	0.53947	0.825453	0.919253	0.92222	0.984067	0	0
50-50	en	reddy	word2vec.avg	skipgram	500	lemma	4	0.78039	0.767153	0.554863	0.844947	0.93233	0.93333	0.986847	0	0	xreddy89	0.7802	0.769753	0.557717	0.845877	0.932967	0.93333	0.986983	0	0
50-50	en	reddy	word2vec.avg	skipgram	500	lemma	8	0.777717	0.763243	0.55403	0.834643	0.92286	0.93333	0.984793	0	0	xreddy89	0.778087	0.766993	0.558057	0.835597	0.92418	0.93333	0.985067	0	0
50-50	en	reddy	word2vec.avg	skipgram	500	lemmapos	1	0.783183	0.75544	0.545023	0.84124	0.925353	0.92222	0.985383	3	0	xreddy89	0.785667	0.761133	0.550043	0.84634	0.927597	0.92222	0.98585	3	0
50-50	en	reddy	word2vec.avg	skipgram	500	lemmapos	4	0.782383	0.762683	0.553967	0.861357	0.93126	0.933333	0.986573	3	0	xreddy89	0.783143	0.765453	0.555607	0.861357	0.931967	0.933333	0.986727	3	0
50-50	en	reddy	word2vec.avg	skipgram	500	lemmapos	8	0.784533	0.763217	0.552193	0.86957	0.930677	0.93333	0.98642	3	0	xreddy89	0.784943	0.76552	0.553453	0.86957	0.931263	0.93333	0.98655	3	0
50-50	en	reddy	word2vec.avg	skipgram	500	surface	1	0.800873	0.799177	0.596713	0.881103	0.94413	0.96667	0.989207	0	1	xreddy89	0.80505	0.80826	0.605797	0.89135	0.948217	0.96667	0.990013	0	0
50-50	en	reddy	word2vec.avg	skipgram	500	surface	4	0.796377	0.783567	0.57554	0.861343	0.938223	0.955557	0.988043	0	1	xreddy89	0.800533	0.79205	0.584143	0.87088	0.941857	0.955557	0.988773	0	0
50-50	en	reddy	word2vec.avg	skipgram	500	surface	8	0.78684	0.770387	0.561303	0.858173	0.932303	0.93333	0.98679	0	1	xreddy89	0.790947	0.77857	0.56908	0.867243	0.935853	0.93333	0.987507	0	0
50-50	en	reddy	word2vec.avg	skipgram	500	surface@stoppy	1	0.793067	0.788573	0.576207	0.868113	0.940287	0.96667	0.988527	0	1	xreddy89	0.797203	0.796603	0.584657	0.868113	0.943367	0.96667	0.989157	0	0
50-50	en	reddy	word2vec.avg	skipgram	500	surface@stoppy	4	0.789227	0.77331	0.565697	0.84899	0.93243	0.97778	0.98689	0	1	xreddy89	0.793347	0.782377	0.574423	0.85923	0.936333	0.97778	0.987693	0	0
50-50	en	reddy	word2vec.avg	skipgram	500	surface@stoppy	8	0.783413	0.776767	0.5662	0.847753	0.931277	0.955557	0.98665	0	1	xreddy89	0.787497	0.784833	0.574597	0.854903	0.9346	0.955557	0.98733	0	0
50-50	en	reddy	word2vec.run1	cbow	250	lemma	1	0.73568	0.71915	0.51951	0.81928	0.90379	0.86667	0.98074	0	0	xreddy89	0.73584	0.72402	0.5243	0.81928	0.9059	0.86667	0.98119	0	0
50-50	en	reddy	word2vec.run1	cbow	250	lemma	4	0.73355	0.72206	0.51801	0.82105	0.91169	0.93333	0.98245	0	0	xreddy89	0.734	0.72467	0.52021	0.82474	0.91266	0.93333	0.98265	0	0
50-50	en	reddy	word2vec.run1	cbow	250	lemma	8	0.74128	0.73384	0.52751	0.8172	0.91042	0.93333	0.98209	0	0	xreddy89	0.74176	0.73734	0.53095	0.82474	0.91171	0.93333	0.98236	0	0
50-50	en	reddy	word2vec.run1	cbow	250	lemmapos	1	0.74976	0.73922	0.52801	0.81818	0.91318	0.9	0.98281	3	0	xreddy89	0.75052	0.74211	0.52992	0.81818	0.91442	0.9	0.98307	3	0
50-50	en	reddy	word2vec.run1	cbow	250	lemmapos	4	0.74355	0.74499	0.53702	0.84211	0.91419	0.9	0.98291	3	0	xreddy89	0.74488	0.74715	0.53862	0.84211	0.91479	0.9	0.98304	3	0
50-50	en	reddy	word2vec.run1	cbow	250	lemmapos	8	0.74996	0.75381	0.55153	0.85714	0.91544	0.93333	0.98308	3	0	xreddy89	0.74982	0.7545	0.55038	0.85714	0.91604	0.93333	0.98321	3	0
50-50	en	reddy	word2vec.run1	cbow	250	surface	1	0.76352	0.754	0.54302	0.84536	0.93057	0.96667	0.98644	0	1	xreddy89	0.76751	0.76188	0.55038	0.85417	0.93418	0.96667	0.98718	0	0
50-50	en	reddy	word2vec.run1	cbow	250	surface	4	0.75829	0.74865	0.54502	0.85366	0.91917	0.9	0.98388	0	1	xreddy89	0.76225	0.7548	0.5509	0.86022	0.92172	0.9	0.9844	0	0
50-50	en	reddy	word2vec.run1	cbow	250	surface	8	0.75202	0.73779	0.53202	0.80952	0.90903	0.9	0.98188	0	1	xreddy89	0.75594	0.74581	0.53964	0.81928	0.91273	0.9	0.98266	0	0
50-50	en	reddy	word2vec.run1	cbow	250	surface@stoppy	1	0.77494	0.7643	0.54602	0.85	0.92704	0.96667	0.9858	0	1	xreddy89	0.77899	0.77138	0.55345	0.85	0.92978	0.96667	0.98638	0	0
50-50	en	reddy	word2vec.run1	cbow	250	surface@stoppy	4	0.75552	0.76275	0.55253	0.83333	0.92402	0.93333	0.98515	0	1	xreddy89	0.75946	0.76854	0.55857	0.83333	0.92632	0.93333	0.98564	0	0
50-50	en	reddy	word2vec.run1	cbow	250	surface@stoppy	8	0.76092	0.76432	0.55603	0.82222	0.92006	0.93333	0.98428	0	1	xreddy89	0.76489	0.77049	0.56164	0.83146	0.92289	0.93333	0.98487	0	0
50-50	en	reddy	word2vec.run1	cbow	750	lemma	1	0.77648	0.78027	0.57154	0.85417	0.93095	0.93333	0.98653	0	0	xreddy89	0.77592	0.78256	0.57391	0.85417	0.9315	0.93333	0.98664	0	0
50-50	en	reddy	word2vec.run1	cbow	750	lemma	4	0.78807	0.77359	0.56385	0.84444	0.92669	0.93333	0.98565	0	0	xreddy89	0.78831	0.77626	0.56759	0.84444	0.9274	0.93333	0.9858	0	0
50-50	en	reddy	word2vec.run1	cbow	750	lemma	8	0.79284	0.7746	0.56904	0.85417	0.92597	0.93333	0.98546	0	0	xreddy89	0.79172	0.7756	0.56982	0.85417	0.92636	0.93333	0.98555	0	0
50-50	en	reddy	word2vec.run1	cbow	750	lemmapos	1	0.79296	0.76467	0.55803	0.82759	0.9281	0.96667	0.98604	3	0	xreddy89	0.79377	0.76912	0.56164	0.82759	0.93008	0.96667	0.98646	3	0
50-50	en	reddy	word2vec.run1	cbow	750	lemmapos	4	0.8004	0.77128	0.56303	0.87912	0.94056	0.96667	0.98853	3	0	xreddy89	0.80012	0.77363	0.5642	0.87912	0.94123	0.96667	0.98867	3	0
50-50	en	reddy	word2vec.run1	cbow	750	lemmapos	8	0.80265	0.77578	0.57354	0.87059	0.93627	0.96667	0.9876	3	0	xreddy89	0.80282	0.77887	0.57545	0.87059	0.93719	0.96667	0.9878	3	0
50-50	en	reddy	word2vec.run1	cbow	750	surface	1	0.79329	0.78197	0.57404	0.86747	0.94094	0.93333	0.98863	0	1	xreddy89	0.79743	0.79112	0.58312	0.87805	0.9455	0.93333	0.98954	0	0
50-50	en	reddy	word2vec.run1	cbow	750	surface	4	0.80284	0.79077	0.58804	0.85366	0.94422	0.96667	0.98936	0	1	xreddy89	0.80703	0.79891	0.59642	0.8642	0.94758	0.96667	0.99003	0	0
50-50	en	reddy	word2vec.run1	cbow	750	surface	8	0.80134	0.77828	0.56954	0.85057	0.93419	0.96667	0.98728	0	1	xreddy89	0.80552	0.78816	0.57903	0.86047	0.93897	0.96667	0.98825	0	0
50-50	en	reddy	word2vec.run1	cbow	750	surface@stoppy	1	0.79955	0.78696	0.57954	0.86076	0.93346	0.96667	0.98709	0	1	xreddy89	0.80372	0.79513	0.58824	0.86076	0.93633	0.96667	0.98769	0	0
50-50	en	reddy	word2vec.run1	cbow	750	surface@stoppy	4	0.80073	0.78073	0.57454	0.8642	0.93706	1	0.98786	0	1	xreddy89	0.80491	0.79052	0.58414	0.875	0.94133	1	0.98873	0	0
50-50	en	reddy	word2vec.run1	cbow	750	surface@stoppy	8	0.79612	0.77705	0.56503	0.85366	0.93399	0.96667	0.98722	0	1	xreddy89	0.80027	0.78614	0.57391	0.8642	0.93747	0.96667	0.98794	0	0
50-50	en	reddy	word2vec.run1	cbow	500	lemma	1	0.77037	0.76772	0.55803	0.85417	0.92412	0.93333	0.9851	0	0	xreddy89	0.76896	0.76803	0.55806	0.85417	0.9243	0.93333	0.98514	0	0
50-50	en	reddy	word2vec.run1	cbow	500	lemma	4	0.77855	0.75977	0.54903	0.83721	0.92495	0.93333	0.98528	0	0	xreddy89	0.77796	0.76221	0.55192	0.83721	0.92562	0.93333	0.98542	0	0
50-50	en	reddy	word2vec.run1	cbow	500	lemma	8	0.78021	0.76215	0.55053	0.83673	0.92803	0.93333	0.98589	0	0	xreddy89	0.7803	0.76419	0.55294	0.83673	0.92848	0.93333	0.98598	0	0
50-50	en	reddy	word2vec.run1	cbow	500	lemmapos	1	0.78112	0.75446	0.54234	0.82609	0.92207	0.93333	0.98471	3	0	xreddy89	0.783	0.75864	0.54559	0.83516	0.92375	0.93333	0.98506	3	0
50-50	en	reddy	word2vec.run1	cbow	500	lemmapos	4	0.7863	0.7632	0.55403	0.85393	0.93104	0.93333	0.98655	3	0	xreddy89	0.78708	0.76559	0.55499	0.85393	0.93164	0.93333	0.98668	3	0
50-50	en	reddy	word2vec.run1	cbow	500	lemmapos	8	0.7869	0.76483	0.55403	0.86957	0.93104	0.93333	0.98654	3	0	xreddy89	0.78737	0.7674	0.55601	0.86957	0.93167	0.93333	0.98667	3	0
50-50	en	reddy	word2vec.run1	cbow	500	surface	1	0.79668	0.7957	0.59155	0.88889	0.94376	0.96667	0.98909	0	1	xreddy89	0.80084	0.80483	0.60051	0.89888	0.9479	0.96667	0.98991	0	0
50-50	en	reddy	word2vec.run1	cbow	500	surface	4	0.80044	0.78994	0.58354	0.86316	0.94039	0.96667	0.98851	0	1	xreddy89	0.80462	0.79938	0.59284	0.87234	0.94487	0.96667	0.98941	0	0
50-50	en	reddy	word2vec.run1	cbow	500	surface	8	0.78632	0.7668	0.56003	0.86364	0.93206	0.93333	0.98676	0	1	xreddy89	0.79042	0.77508	0.56778	0.87356	0.9358	0.93333	0.98752	0	0
50-50	en	reddy	word2vec.run1	cbow	500	surface@stoppy	1	0.79754	0.79608	0.58604	0.87179	0.94116	0.96667	0.98873	0	1	xreddy89	0.8017	0.80386	0.59437	0.87179	0.94421	0.96667	0.98936	0	0
50-50	en	reddy	word2vec.run1	cbow	500	surface@stoppy	4	0.78757	0.76981	0.56103	0.82927	0.9296	0.96667	0.98634	0	1	xreddy89	0.79168	0.77972	0.57033	0.83951	0.93419	0.96667	0.98729	0	0
50-50	en	reddy	word2vec.run1	cbow	500	surface@stoppy	8	0.78255	0.7643	0.55253	0.84337	0.92816	0.96667	0.98598	0	1	xreddy89	0.78664	0.77177	0.55959	0.85366	0.93108	0.96667	0.98659	0	0
50-50	en	reddy	word2vec.run1	skipgram	250	lemma	1	0.73233	0.70798	0.501	0.83333	0.90325	0.9	0.98062	0	0	xreddy89	0.73183	0.71172	0.50333	0.83333	0.90521	0.9	0.98105	0	0
50-50	en	reddy	word2vec.run1	skipgram	250	lemma	4	0.73383	0.73342	0.53102	0.81319	0.91144	0.93333	0.98238	0	0	xreddy89	0.73415	0.73633	0.5335	0.82	0.91241	0.93333	0.98259	0	0
50-50	en	reddy	word2vec.run1	skipgram	250	lemma	8	0.74257	0.73894	0.53402	0.82828	0.91018	0.9	0.98201	0	0	xreddy89	0.74204	0.73985	0.53453	0.82828	0.91058	0.9	0.98209	0	0
50-50	en	reddy	word2vec.run1	skipgram	250	lemmapos	1	0.74698	0.73512	0.52501	0.81395	0.90766	0.9	0.98157	3	0	xreddy89	0.74767	0.73858	0.52685	0.8172	0.90916	0.9	0.9819	3	0
50-50	en	reddy	word2vec.run1	skipgram	250	lemmapos	4	0.74416	0.74856	0.54352	0.83146	0.91931	0.93333	0.98409	3	0	xreddy89	0.74539	0.75201	0.54578	0.83146	0.9206	0.93333	0.98436	3	0
50-50	en	reddy	word2vec.run1	skipgram	250	lemmapos	8	0.75121	0.75347	0.54953	0.86022	0.92132	0.93333	0.9844	3	0	xreddy89	0.75129	0.75499	0.54936	0.86022	0.92194	0.93333	0.98453	3	0
50-50	en	reddy	word2vec.run1	skipgram	250	surface	1	0.76971	0.76148	0.55453	0.83871	0.92691	0.93333	0.98567	0	1	xreddy89	0.77373	0.76963	0.56266	0.84783	0.93046	0.93333	0.9864	0	0
50-50	en	reddy	word2vec.run1	skipgram	250	surface	4	0.75915	0.75314	0.54552	0.84444	0.92092	0.93333	0.98436	0	1	xreddy89	0.76312	0.75988	0.55141	0.85393	0.92388	0.93333	0.98497	0	0
50-50	en	reddy	word2vec.run1	skipgram	250	surface	8	0.75332	0.7459	0.53502	0.82759	0.9145	0.93333	0.98299	0	1	xreddy89	0.75725	0.75252	0.54118	0.83721	0.91739	0.93333	0.98359	0	0
50-50	en	reddy	word2vec.run1	skipgram	250	surface@stoppy	1	0.77969	0.77414	0.55553	0.85714	0.93141	0.96667	0.98668	0	1	xreddy89	0.78376	0.78143	0.56317	0.85714	0.93424	0.96667	0.98727	0	0
50-50	en	reddy	word2vec.run1	skipgram	250	surface@stoppy	4	0.76098	0.76121	0.55053	0.83333	0.92319	0.93333	0.98497	0	1	xreddy89	0.76495	0.76744	0.55703	0.83333	0.92544	0.93333	0.98544	0	0
50-50	en	reddy	word2vec.run1	skipgram	250	surface@stoppy	8	0.76183	0.77056	0.56303	0.84091	0.92373	0.9	0.98504	0	1	xreddy89	0.76581	0.7762	0.56829	0.85057	0.92623	0.9	0.98556	0	0
50-50	en	reddy	word2vec.run1	skipgram	750	lemma	1	0.77563	0.77116	0.56103	0.84444	0.9275	0.93333	0.98582	0	0	xreddy89	0.77487	0.77342	0.56368	0.84444	0.9283	0.93333	0.98599	0	0
50-50	en	reddy	word2vec.run1	skipgram	750	lemma	4	0.79618	0.7808	0.56753	0.85714	0.93421	0.93333	0.98719	0	0	xreddy89	0.79607	0.78357	0.57033	0.85714	0.93489	0.93333	0.98734	0	0
50-50	en	reddy	word2vec.run1	skipgram	750	lemma	8	0.78931	0.77031	0.56003	0.85393	0.9269	0.93333	0.98566	0	0	xreddy89	0.78885	0.77232	0.56215	0.85393	0.92733	0.93333	0.98575	0	0
50-50	en	reddy	word2vec.run1	skipgram	750	lemmapos	1	0.78918	0.76287	0.54702	0.84536	0.93486	0.93333	0.98743	3	0	xreddy89	0.78867	0.76478	0.54834	0.84536	0.9353	0.93333	0.98752	3	0
50-50	en	reddy	word2vec.run1	skipgram	750	lemmapos	4	0.80208	0.77349	0.56753	0.86957	0.93721	0.96667	0.98783	3	0	xreddy89	0.80281	0.77603	0.5688	0.86957	0.93781	0.96667	0.98796	3	0
50-50	en	reddy	word2vec.run1	skipgram	750	lemmapos	8	0.80238	0.77582	0.56803	0.8764	0.94023	0.96667	0.98842	3	0	xreddy89	0.80265	0.77889	0.57033	0.8764	0.94086	0.96667	0.98856	3	0
50-50	en	reddy	word2vec.run1	skipgram	750	surface	1	0.81447	0.81193	0.60205	0.89888	0.94986	0.93333	0.99035	0	1	xreddy89	0.81872	0.82119	0.61125	0.90909	0.95422	0.93333	0.9912	0	0
50-50	en	reddy	word2vec.run1	skipgram	750	surface	4	0.80531	0.79049	0.57754	0.86957	0.94776	0.96667	0.99005	0	1	xreddy89	0.80951	0.79925	0.58619	0.87912	0.95119	0.96667	0.99074	0	0
50-50	en	reddy	word2vec.run1	skipgram	750	surface	8	0.79351	0.7717	0.56253	0.83544	0.92805	0.96667	0.98598	0	1	xreddy89	0.79765	0.78001	0.57084	0.84337	0.93147	0.96667	0.98669	0	0
50-50	en	reddy	word2vec.run1	skipgram	750	surface@stoppy	1	0.80802	0.80512	0.59687	0.88095	0.94336	0.96667	0.98914	0	1	xreddy89	0.81224	0.81373	0.60596	0.89157	0.94658	0.96667	0.98979	0	0
50-50	en	reddy	word2vec.run1	skipgram	750	surface@stoppy	4	0.80261	0.78732	0.57804	0.86076	0.93796	0.96667	0.98802	0	1	xreddy89	0.8068	0.79529	0.58619	0.8642	0.94106	0.96667	0.98866	0	0
50-50	en	reddy	word2vec.run1	skipgram	750	surface@stoppy	8	0.79164	0.76805	0.55903	0.85366	0.92995	0.96667	0.98634	0	1	xreddy89	0.79577	0.7774	0.56829	0.8642	0.93403	0.96667	0.98718	0	0
50-50	en	reddy	word2vec.run1	skipgram	500	lemma	1	0.76317	0.75291	0.54452	0.83168	0.92554	0.93333	0.98543	0	0	xreddy89	0.76214	0.75376	0.54578	0.83168	0.92573	0.93333	0.98548	0	0
50-50	en	reddy	word2vec.run1	skipgram	500	lemma	4	0.78011	0.76551	0.55403	0.83721	0.93276	0.93333	0.98695	0	0	xreddy89	0.78031	0.76826	0.55703	0.84	0.93356	0.93333	0.98712	0	0
50-50	en	reddy	word2vec.run1	skipgram	500	lemma	8	0.7762	0.7631	0.55403	0.83544	0.92431	0.93333	0.98511	0	0	xreddy89	0.77727	0.76846	0.55908	0.83673	0.92651	0.93333	0.98556	0	0
50-50	en	reddy	word2vec.run1	skipgram	500	lemmapos	1	0.78768	0.76022	0.54702	0.85366	0.92643	0.93333	0.98562	3	0	xreddy89	0.79121	0.76686	0.55294	0.85366	0.92887	0.93333	0.98613	3	0
50-50	en	reddy	word2vec.run1	skipgram	500	lemmapos	4	0.78639	0.7679	0.55903	0.86957	0.93459	0.96667	0.98727	3	0	xreddy89	0.78726	0.77037	0.5601	0.86957	0.9352	0.96667	0.98741	3	0
50-50	en	reddy	word2vec.run1	skipgram	500	lemmapos	8	0.78812	0.76317	0.55253	0.86957	0.93318	0.93333	0.98695	3	0	xreddy89	0.78834	0.76553	0.55396	0.86957	0.93377	0.93333	0.98708	3	0
50-50	en	reddy	word2vec.run1	skipgram	500	surface	1	0.7969	0.79002	0.58554	0.87059	0.94219	0.96667	0.9888	0	1	xreddy89	0.80105	0.79894	0.59437	0.88095	0.94623	0.96667	0.9896	0	0
50-50	en	reddy	word2vec.run1	skipgram	500	surface	4	0.79641	0.78569	0.57604	0.86022	0.94023	0.93333	0.98847	0	1	xreddy89	0.80057	0.7937	0.58414	0.86957	0.94356	0.93333	0.98913	0	0
50-50	en	reddy	word2vec.run1	skipgram	500	surface	8	0.79059	0.77968	0.56803	0.87059	0.93335	0.93333	0.98698	0	1	xreddy89	0.79472	0.7881	0.57596	0.88095	0.93721	0.93333	0.98775	0	0
50-50	en	reddy	word2vec.run1	skipgram	500	surface@stoppy	1	0.79443	0.79018	0.57954	0.87179	0.93915	0.96667	0.98828	0	1	xreddy89	0.79857	0.79833	0.58824	0.87179	0.9422	0.96667	0.98891	0	0
50-50	en	reddy	word2vec.run1	skipgram	500	surface@stoppy	4	0.78832	0.76849	0.56153	0.85	0.93129	1	0.98665	0	1	xreddy89	0.79244	0.77706	0.57033	0.86076	0.93467	1	0.98735	0	0
50-50	en	reddy	word2vec.run1	skipgram	500	surface@stoppy	8	0.78716	0.77982	0.56653	0.86076	0.9359	0.96667	0.98761	0	1	xreddy89	0.79126	0.78767	0.57494	0.8642	0.93896	0.96667	0.98823	0	0
50-50	en	reddy	word2vec.run2	cbow	250	lemma	1	0.73004	0.70691	0.501	0.83333	0.90277	0.86667	0.98053	0	0	xreddy89	0.7292	0.70933	0.50179	0.83333	0.90417	0.86667	0.98083	0	0
50-50	en	reddy	word2vec.run2	cbow	250	lemma	4	0.73368	0.72581	0.52301	0.81395	0.90909	0.93333	0.98186	0	0	xreddy89	0.73338	0.72811	0.52532	0.81633	0.91005	0.93333	0.98206	0	0
50-50	en	reddy	word2vec.run2	cbow	250	lemma	8	0.7465	0.73822	0.53652	0.83516	0.91096	0.93333	0.98216	0	0	xreddy89	0.74576	0.73883	0.53657	0.83516	0.91137	0.93333	0.98225	0	0
50-50	en	reddy	word2vec.run2	cbow	250	lemmapos	1	0.7448	0.73095	0.52233	0.81928	0.91493	0.93333	0.98317	3	0	xreddy89	0.74784	0.73688	0.52718	0.82759	0.91726	0.93333	0.98366	3	0
50-50	en	reddy	word2vec.run2	cbow	250	lemmapos	4	0.74874	0.75298	0.54352	0.85714	0.91991	0.93333	0.98418	3	0	xreddy89	0.74963	0.75495	0.54425	0.85714	0.92085	0.93333	0.98438	3	0
50-50	en	reddy	word2vec.run2	cbow	250	lemmapos	8	0.74838	0.75006	0.54402	0.85714	0.9182	0.93333	0.98374	3	0	xreddy89	0.74846	0.7516	0.54476	0.85714	0.91878	0.93333	0.98387	3	0
50-50	en	reddy	word2vec.run2	cbow	250	surface	1	0.76648	0.75961	0.55003	0.84444	0.92816	0.93333	0.98593	0	1	xreddy89	0.77048	0.76775	0.55806	0.85393	0.93174	0.93333	0.98667	0	0
50-50	en	reddy	word2vec.run2	cbow	250	surface	4	0.75993	0.76156	0.55403	0.86047	0.92279	0.9	0.98464	0	1	xreddy89	0.7639	0.76729	0.55959	0.87059	0.92502	0.9	0.98509	0	0
50-50	en	reddy	word2vec.run2	cbow	250	surface	8	0.75597	0.74934	0.54152	0.83871	0.91455	0.9	0.98295	0	1	xreddy89	0.75991	0.75609	0.54783	0.84783	0.91754	0.9	0.98357	0	0
50-50	en	reddy	word2vec.run2	cbow	250	surface@stoppy	1	0.77643	0.76533	0.55103	0.85	0.92637	0.96667	0.98564	0	1	xreddy89	0.78048	0.77248	0.55857	0.85	0.92906	0.96667	0.98621	0	0
50-50	en	reddy	word2vec.run2	cbow	250	surface@stoppy	4	0.75766	0.75419	0.54402	0.83333	0.91907	0.93333	0.98411	0	1	xreddy89	0.76161	0.76003	0.55038	0.83333	0.92132	0.93333	0.98458	0	0
50-50	en	reddy	word2vec.run2	cbow	250	surface@stoppy	8	0.76162	0.76336	0.55653	0.83544	0.91875	0.93333	0.98396	0	1	xreddy89	0.7656	0.76978	0.56266	0.83721	0.92153	0.93333	0.98454	0	0
50-50	en	reddy	word2vec.run2	cbow	750	lemma	1	0.78164	0.77577	0.56553	0.84444	0.92955	0.93333	0.98629	0	0	xreddy89	0.78005	0.77555	0.56471	0.84444	0.92974	0.93333	0.98633	0	0
50-50	en	reddy	word2vec.run2	cbow	750	lemma	4	0.80066	0.78956	0.57654	0.86047	0.9349	0.96667	0.98736	0	0	xreddy89	0.79905	0.78926	0.57494	0.86047	0.93508	0.96667	0.9874	0	0
50-50	en	reddy	word2vec.run2	cbow	750	lemma	8	0.78318	0.77199	0.56603	0.84848	0.92461	0.93333	0.98517	0	0	xreddy89	0.78249	0.77296	0.56726	0.84848	0.9248	0.93333	0.98521	0	0
50-50	en	reddy	word2vec.run2	cbow	750	lemmapos	1	0.79751	0.76817	0.55603	0.83871	0.92923	0.93333	0.98625	3	0	xreddy89	0.79763	0.77093	0.55806	0.83871	0.93023	0.93333	0.98646	3	0
50-50	en	reddy	word2vec.run2	cbow	750	lemmapos	4	0.79827	0.7677	0.55803	0.85106	0.92843	0.96667	0.98603	3	0	xreddy89	0.79833	0.77001	0.55908	0.85106	0.92904	0.96667	0.98617	3	0
50-50	en	reddy	word2vec.run2	cbow	750	lemmapos	8	0.80466	0.77704	0.56904	0.8764	0.93948	0.93333	0.98827	3	0	xreddy89	0.80542	0.78074	0.57187	0.8764	0.94045	0.93333	0.98848	3	0
50-50	en	reddy	word2vec.run2	cbow	750	surface	1	0.81142	0.80902	0.60555	0.88636	0.94735	0.96667	0.98988	0	1	xreddy89	0.81565	0.81821	0.61483	0.89655	0.95155	0.96667	0.99071	0	0
50-50	en	reddy	word2vec.run2	cbow	750	surface	4	0.80305	0.78804	0.57604	0.85714	0.94032	0.96667	0.98855	0	1	xreddy89	0.80724	0.79622	0.58414	0.86667	0.94351	0.96667	0.98919	0	0
50-50	en	reddy	word2vec.run2	cbow	750	surface	8	0.79923	0.78413	0.57654	0.85106	0.93554	0.96667	0.98754	0	1	xreddy89	0.8034	0.79344	0.58568	0.86022	0.93978	0.96667	0.9884	0	0
50-50	en	reddy	word2vec.run2	cbow	750	surface@stoppy	1	0.80101	0.79003	0.58204	0.84615	0.93096	0.96667	0.98661	0	1	xreddy89	0.80519	0.79832	0.59079	0.85057	0.93438	0.96667	0.98732	0	0
50-50	en	reddy	word2vec.run2	cbow	750	surface@stoppy	4	0.79821	0.77711	0.56703	0.86076	0.93763	1	0.98796	0	1	xreddy89	0.80238	0.78512	0.57494	0.86076	0.94061	1	0.98857	0	0
50-50	en	reddy	word2vec.run2	cbow	750	surface@stoppy	8	0.79024	0.76629	0.55653	0.84615	0.93166	0.96667	0.98672	0	1	xreddy89	0.79436	0.77524	0.56522	0.85366	0.93516	0.96667	0.98744	0	0
50-50	en	reddy	word2vec.run2	cbow	500	lemma	1	0.76308	0.7601	0.55153	0.83673	0.91877	0.9	0.98399	0	0	xreddy89	0.76202	0.76042	0.55141	0.83673	0.91919	0.9	0.98408	0	0
50-50	en	reddy	word2vec.run2	cbow	500	lemma	4	0.78083	0.76631	0.55403	0.84091	0.92868	0.93333	0.98603	0	0	xreddy89	0.7806	0.76908	0.55703	0.84091	0.92934	0.93333	0.98617	0	0
50-50	en	reddy	word2vec.run2	cbow	500	lemma	8	0.77755	0.76176	0.55103	0.83117	0.92509	0.93333	0.98526	0	0	xreddy89	0.77718	0.76393	0.55396	0.83117	0.92551	0.93333	0.98535	0	0
50-50	en	reddy	word2vec.run2	cbow	500	lemmapos	1	0.79011	0.76507	0.55253	0.84337	0.9303	0.93333	0.98645	3	0	xreddy89	0.79208	0.76971	0.55703	0.84337	0.93205	0.93333	0.98681	3	0
50-50	en	reddy	word2vec.run2	cbow	500	lemmapos	4	0.79079	0.77264	0.56253	0.85106	0.93632	0.96667	0.98767	3	0	xreddy89	0.79127	0.77511	0.56368	0.85106	0.93697	0.96667	0.98781	3	0
50-50	en	reddy	word2vec.run2	cbow	500	lemmapos	8	0.77826	0.75352	0.54802	0.87912	0.92925	0.93333	0.98605	3	0	xreddy89	0.77894	0.75602	0.54987	0.87912	0.9299	0.93333	0.98619	3	0
50-50	en	reddy	word2vec.run2	cbow	500	surface	1	0.80981	0.80725	0.60755	0.88889	0.94861	0.96667	0.99014	0	1	xreddy89	0.81403	0.81666	0.61688	0.89888	0.95285	0.96667	0.99098	0	0
50-50	en	reddy	word2vec.run2	cbow	500	surface	4	0.80047	0.78811	0.58104	0.86316	0.93987	0.96667	0.98838	0	1	xreddy89	0.80465	0.7968	0.58977	0.87234	0.94379	0.96667	0.98917	0	0
50-50	en	reddy	word2vec.run2	cbow	500	surface	8	0.78166	0.75731	0.55053	0.83871	0.92493	0.93333	0.98526	0	1	xreddy89	0.78574	0.76546	0.55857	0.84783	0.92837	0.93333	0.98597	0	0
50-50	en	reddy	word2vec.run2	cbow	500	surface@stoppy	1	0.80003	0.7938	0.58054	0.87179	0.94025	0.96667	0.98853	0	1	xreddy89	0.80421	0.80142	0.58875	0.87179	0.94328	0.96667	0.98915	0	0
50-50	en	reddy	word2vec.run2	cbow	500	surface@stoppy	4	0.79623	0.78355	0.57404	0.85366	0.93948	1	0.98838	0	1	xreddy89	0.80039	0.79227	0.58312	0.8642	0.94318	1	0.98914	0	0
50-50	en	reddy	word2vec.run2	cbow	500	surface@stoppy	8	0.78517	0.77185	0.56353	0.85366	0.92949	0.96667	0.98622	0	1	xreddy89	0.78927	0.77946	0.57136	0.8642	0.93235	0.96667	0.98682	0	0
50-50	en	reddy	word2vec.run2	skipgram	250	lemma	1	0.73446	0.71073	0.5045	0.83333	0.90211	0.9	0.98037	0	0	xreddy89	0.73387	0.71279	0.50537	0.83333	0.90331	0.9	0.98062	0	0
50-50	en	reddy	word2vec.run2	skipgram	250	lemma	4	0.73964	0.7298	0.52151	0.82222	0.91076	0.93333	0.98221	0	0	xreddy89	0.7393	0.73166	0.52276	0.82222	0.9117	0.93333	0.98242	0	0
50-50	en	reddy	word2vec.run2	skipgram	250	lemma	8	0.7422	0.72887	0.52401	0.8172	0.90681	0.93333	0.98134	0	0	xreddy89	0.74294	0.73221	0.52685	0.8172	0.90803	0.93333	0.9816	0	0
50-50	en	reddy	word2vec.run2	skipgram	250	lemmapos	1	0.74667	0.73538	0.52601	0.82353	0.90686	0.86667	0.98136	3	0	xreddy89	0.7478	0.73914	0.52839	0.82353	0.90873	0.86667	0.98176	3	0
50-50	en	reddy	word2vec.run2	skipgram	250	lemmapos	4	0.74477	0.74201	0.53652	0.81928	0.91114	0.9	0.98233	3	0	xreddy89	0.74671	0.74612	0.53964	0.82474	0.91274	0.9	0.98267	3	0
50-50	en	reddy	word2vec.run2	skipgram	250	lemmapos	8	0.75321	0.75697	0.55003	0.86022	0.92193	0.93333	0.98459	3	0	xreddy89	0.75397	0.75842	0.54987	0.86022	0.92253	0.93333	0.98472	3	0
50-50	en	reddy	word2vec.run2	skipgram	250	surface	1	0.77253	0.76067	0.54903	0.85417	0.92938	0.96667	0.98617	0	1	xreddy89	0.77657	0.769	0.55703	0.86316	0.933	0.96667	0.98691	0	0
50-50	en	reddy	word2vec.run2	skipgram	250	surface	4	0.76441	0.76053	0.55503	0.84783	0.92351	0.93333	0.98494	0	1	xreddy89	0.7684	0.76744	0.56061	0.85714	0.92656	0.93333	0.98556	0	0
50-50	en	reddy	word2vec.run2	skipgram	250	surface	8	0.74924	0.74353	0.53652	0.83146	0.91262	0.9	0.98262	0	1	xreddy89	0.75315	0.75015	0.54271	0.84091	0.91548	0.9	0.98322	0	0
50-50	en	reddy	word2vec.run2	skipgram	250	surface@stoppy	1	0.77961	0.77358	0.55803	0.86076	0.93127	0.96667	0.98667	0	1	xreddy89	0.78368	0.78092	0.56573	0.86076	0.93407	0.96667	0.98726	0	0
50-50	en	reddy	word2vec.run2	skipgram	250	surface@stoppy	4	0.76792	0.76486	0.55603	0.83333	0.92491	0.93333	0.98534	0	1	xreddy89	0.77193	0.77027	0.56164	0.83333	0.92727	0.93333	0.98584	0	0
50-50	en	reddy	word2vec.run2	skipgram	250	surface@stoppy	8	0.75272	0.75003	0.54502	0.81818	0.91527	0.93333	0.98328	0	1	xreddy89	0.75665	0.75768	0.55243	0.82759	0.9184	0.93333	0.98394	0	0
50-50	en	reddy	word2vec.run2	skipgram	750	lemma	1	0.77653	0.7744	0.56603	0.83871	0.92382	0.93333	0.98501	0	0	xreddy89	0.77557	0.77616	0.56829	0.83871	0.92427	0.93333	0.98511	0	0
50-50	en	reddy	word2vec.run2	skipgram	750	lemma	4	0.79453	0.77153	0.55853	0.8642	0.93187	0.96667	0.98671	0	0	xreddy89	0.79357	0.77361	0.55959	0.8642	0.93225	0.96667	0.98679	0	0
50-50	en	reddy	word2vec.run2	skipgram	750	lemma	8	0.78979	0.77529	0.56553	0.84783	0.93166	0.93333	0.98662	0	0	xreddy89	0.78925	0.77702	0.56778	0.84783	0.93184	0.93333	0.98666	0	0
50-50	en	reddy	word2vec.run2	skipgram	750	lemmapos	1	0.78356	0.75506	0.54402	0.83721	0.92549	0.93333	0.98547	3	0	xreddy89	0.78424	0.75884	0.5468	0.83721	0.9271	0.93333	0.98581	3	0
50-50	en	reddy	word2vec.run2	skipgram	750	lemmapos	4	0.80042	0.77034	0.56203	0.85714	0.93674	0.96667	0.98776	3	0	xreddy89	0.8005	0.77319	0.5642	0.85714	0.93734	0.96667	0.98789	3	0
50-50	en	reddy	word2vec.run2	skipgram	750	lemmapos	8	0.80066	0.77721	0.56854	0.86747	0.93966	0.96667	0.98835	3	0	xreddy89	0.80103	0.78011	0.57084	0.86747	0.94031	0.96667	0.98849	3	0
50-50	en	reddy	word2vec.run2	skipgram	750	surface	1	0.79994	0.78837	0.57754	0.88372	0.94102	0.93333	0.98861	0	1	xreddy89	0.80411	0.79864	0.58721	0.89412	0.94627	0.93333	0.98966	0	0
50-50	en	reddy	word2vec.run2	skipgram	750	surface	4	0.80573	0.79078	0.57954	0.86667	0.9483	0.96667	0.99017	0	1	xreddy89	0.80993	0.79919	0.58772	0.8764	0.95178	0.96667	0.99086	0	0
50-50	en	reddy	word2vec.run2	skipgram	750	surface	8	0.80094	0.783	0.57554	0.86364	0.9386	0.96667	0.98814	0	1	xreddy89	0.80512	0.7926	0.58466	0.87356	0.94304	0.96667	0.98903	0	0
50-50	en	reddy	word2vec.run2	skipgram	750	surface@stoppy	1	0.80172	0.79379	0.58404	0.87179	0.93846	0.96667	0.9881	0	1	xreddy89	0.8059	0.80227	0.59284	0.88095	0.9415	0.96667	0.98873	0	0
50-50	en	reddy	word2vec.run2	skipgram	750	surface@stoppy	4	0.80606	0.79305	0.58604	0.86076	0.94214	1	0.9889	0	1	xreddy89	0.81026	0.80134	0.59489	0.86747	0.94532	1	0.98954	0	0
50-50	en	reddy	word2vec.run2	skipgram	750	surface@stoppy	8	0.78919	0.77638	0.56703	0.84337	0.93122	0.96667	0.98666	0	1	xreddy89	0.79331	0.7852	0.57545	0.85366	0.93522	0.96667	0.98748	0	0
50-50	en	reddy	word2vec.run2	skipgram	500	lemma	1	0.77198	0.76522	0.55703	0.83516	0.92364	0.9	0.98497	0	0	xreddy89	0.7706	0.765	0.55652	0.83516	0.92383	0.9	0.98501	0	0
50-50	en	reddy	word2vec.run2	skipgram	500	lemma	4	0.78321	0.76716	0.55403	0.84706	0.93333	0.93333	0.98705	0	0	xreddy89	0.78271	0.77008	0.55755	0.84706	0.93404	0.93333	0.9872	0	0
50-50	en	reddy	word2vec.run2	skipgram	500	lemma	8	0.78073	0.76204	0.55003	0.83516	0.9247	0.93333	0.98518	0	0	xreddy89	0.78078	0.76573	0.55396	0.83673	0.92605	0.93333	0.98546	0	0
50-50	en	reddy	word2vec.run2	skipgram	500	lemmapos	1	0.78985	0.76856	0.55903	0.83673	0.92597	0.9	0.98551	3	0	xreddy89	0.79236	0.77466	0.5642	0.84536	0.92854	0.9	0.98604	3	0
50-50	en	reddy	word2vec.run2	skipgram	500	lemmapos	4	0.78147	0.75987	0.55403	0.86667	0.93155	0.93333	0.98663	3	0	xreddy89	0.78254	0.76328	0.55601	0.86667	0.93245	0.93333	0.98682	3	0
50-50	en	reddy	word2vec.run2	skipgram	500	lemmapos	8	0.78677	0.76787	0.55653	0.86957	0.93283	0.93333	0.98687	3	0	xreddy89	0.78745	0.77043	0.55806	0.86957	0.93341	0.93333	0.987	3	0
50-50	en	reddy	word2vec.run2	skipgram	500	surface	1	0.80105	0.80589	0.60705	0.88636	0.94375	0.96667	0.98912	0	1	xreddy89	0.80523	0.81507	0.61637	0.89655	0.94786	0.96667	0.98993	0	0
50-50	en	reddy	word2vec.run2	skipgram	500	surface	4	0.79563	0.78556	0.57904	0.85714	0.93516	0.96667	0.98741	0	1	xreddy89	0.79978	0.7944	0.58824	0.86667	0.93881	0.96667	0.98816	0	0
50-50	en	reddy	word2vec.run2	skipgram	500	surface	8	0.78327	0.76202	0.55735	0.85393	0.92993	0.93333	0.98629	0	1	xreddy89	0.78736	0.77036	0.56555	0.86364	0.93359	0.93333	0.98703	0	0
50-50	en	reddy	word2vec.run2	skipgram	500	surface@stoppy	1	0.79588	0.78836	0.57604	0.87179	0.9418	0.96667	0.98882	0	1	xreddy89	0.80003	0.79664	0.58466	0.87179	0.94497	0.96667	0.98946	0	0
50-50	en	reddy	word2vec.run2	skipgram	500	surface@stoppy	4	0.78825	0.77171	0.56753	0.83333	0.93153	0.96667	0.98673	0	1	xreddy89	0.79236	0.78117	0.57647	0.84337	0.9356	0.96667	0.98757	0	0
50-50	en	reddy	word2vec.run2	skipgram	500	surface@stoppy	8	0.78082	0.77144	0.56303	0.84706	0.93076	0.93333	0.98653	0	1	xreddy89	0.78489	0.78013	0.57187	0.85714	0.93428	0.93333	0.98725	0	0
50-50	en	reddy	word2vec.run3	cbow	250	lemma	1	0.73171	0.71112	0.508	0.83333	0.90271	0.86667	0.98049	0	0	xreddy89	0.73062	0.71306	0.50895	0.83333	0.90368	0.86667	0.98069	0	0
50-50	en	reddy	word2vec.run3	cbow	250	lemma	4	0.73137	0.72136	0.51751	0.8172	0.90877	0.9	0.9818	0	0	xreddy89	0.73198	0.72463	0.52021	0.8172	0.91002	0.9	0.98207	0	0
50-50	en	reddy	word2vec.run3	cbow	250	lemma	8	0.7397	0.73214	0.52601	0.82609	0.90903	0.93333	0.98178	0	0	xreddy89	0.73982	0.73444	0.52788	0.82609	0.90999	0.93333	0.98198	0	0
50-50	en	reddy	word2vec.run3	cbow	250	lemmapos	1	0.74244	0.72465	0.51551	0.80952	0.91001	0.9	0.98212	3	0	xreddy89	0.74359	0.72884	0.51816	0.80952	0.91186	0.9	0.98252	3	0
50-50	en	reddy	word2vec.run3	cbow	250	lemmapos	4	0.7413	0.74071	0.53502	0.83333	0.91138	0.86667	0.98237	3	0	xreddy89	0.74332	0.74519	0.53811	0.83333	0.91322	0.86667	0.98276	3	0
50-50	en	reddy	word2vec.run3	cbow	250	lemmapos	8	0.75222	0.75845	0.55253	0.86667	0.92063	0.9	0.98428	3	0	xreddy89	0.75296	0.75999	0.55243	0.86667	0.92126	0.9	0.98442	3	0
50-50	en	reddy	word2vec.run3	cbow	250	surface	1	0.7684	0.75216	0.54452	0.83544	0.92832	0.96667	0.98599	0	1	xreddy89	0.77241	0.76003	0.55192	0.84211	0.93182	0.96667	0.98671	0	0
50-50	en	reddy	word2vec.run3	cbow	250	surface	4	0.76071	0.75095	0.54202	0.85106	0.92339	0.9	0.98486	0	1	xreddy89	0.76468	0.75769	0.54783	0.86022	0.92653	0.9	0.9855	0	0
50-50	en	reddy	word2vec.run3	cbow	250	surface	8	0.75681	0.74513	0.53752	0.82609	0.91869	0.93333	0.98395	0	1	xreddy89	0.76076	0.75163	0.54322	0.83516	0.92153	0.93333	0.98454	0	0
50-50	en	reddy	word2vec.run3	cbow	250	surface@stoppy	1	0.7622	0.76004	0.54052	0.85	0.9229	0.93333	0.98488	0	1	xreddy89	0.76618	0.76701	0.54783	0.85	0.92559	0.93333	0.98545	0	0
50-50	en	reddy	word2vec.run3	cbow	250	surface@stoppy	4	0.76392	0.75972	0.55053	0.83333	0.92446	0.93333	0.98523	0	1	xreddy89	0.76791	0.76557	0.55652	0.83333	0.92676	0.93333	0.98572	0	0
50-50	en	reddy	word2vec.run3	cbow	250	surface@stoppy	8	0.75727	0.76022	0.55203	0.82222	0.91834	0.9	0.98389	0	1	xreddy89	0.76122	0.76675	0.55806	0.83146	0.92113	0.9	0.98447	0	0
50-50	en	reddy	word2vec.run3	cbow	750	lemma	1	0.78439	0.78653	0.57804	0.85106	0.93205	0.93333	0.98679	0	0	xreddy89	0.78385	0.78854	0.58056	0.85106	0.93253	0.93333	0.98689	0	0
50-50	en	reddy	word2vec.run3	cbow	750	lemma	4	0.79833	0.78197	0.57004	0.85	0.93301	0.93333	0.98696	0	0	xreddy89	0.79755	0.78395	0.57187	0.85	0.93344	0.93333	0.98706	0	0
50-50	en	reddy	word2vec.run3	cbow	750	lemma	8	0.78737	0.77005	0.55953	0.85393	0.92755	0.93333	0.98578	0	0	xreddy89	0.78712	0.77222	0.56215	0.85393	0.92798	0.93333	0.98587	0	0
50-50	en	reddy	word2vec.run3	cbow	750	lemmapos	1	0.79635	0.76631	0.55553	0.83117	0.93021	0.93333	0.98644	3	0	xreddy89	0.79631	0.7694	0.55857	0.83333	0.93118	0.93333	0.98664	3	0
50-50	en	reddy	word2vec.run3	cbow	750	lemmapos	4	0.79304	0.76493	0.56003	0.86667	0.93093	0.93333	0.98651	3	0	xreddy89	0.79369	0.76838	0.56215	0.86667	0.93191	0.93333	0.98672	3	0
50-50	en	reddy	word2vec.run3	cbow	750	lemmapos	8	0.79957	0.7793	0.57004	0.86957	0.93985	0.96667	0.98833	3	0	xreddy89	0.7994	0.78178	0.57136	0.86957	0.94051	0.96667	0.98847	3	0
50-50	en	reddy	word2vec.run3	cbow	750	surface	1	0.80363	0.78935	0.57454	0.88372	0.94049	0.96667	0.98853	0	1	xreddy89	0.80782	0.79807	0.58312	0.89412	0.94443	0.96667	0.98931	0	0
50-50	en	reddy	word2vec.run3	cbow	750	surface	4	0.80706	0.7971	0.58754	0.88372	0.94613	0.96667	0.98966	0	1	xreddy89	0.81128	0.80617	0.59642	0.89412	0.95018	0.96667	0.99047	0	0
50-50	en	reddy	word2vec.run3	cbow	750	surface	8	0.79892	0.77884	0.57004	0.86022	0.93637	0.96667	0.98769	0	1	xreddy89	0.80309	0.78736	0.57852	0.86957	0.94012	0.96667	0.98845	0	0
50-50	en	reddy	word2vec.run3	cbow	750	surface@stoppy	1	0.80152	0.79484	0.58754	0.87059	0.94626	0.96667	0.98974	0	1	xreddy89	0.80571	0.8044	0.59693	0.88095	0.95091	0.96667	0.99067	0	0
50-50	en	reddy	word2vec.run3	cbow	750	surface@stoppy	4	0.7971	0.78099	0.57304	0.85	0.93441	0.96667	0.98732	0	1	xreddy89	0.80126	0.78975	0.5821	0.86076	0.93796	0.96667	0.98805	0	0
50-50	en	reddy	word2vec.run3	cbow	750	surface@stoppy	8	0.78692	0.76897	0.55603	0.8642	0.93383	0.96667	0.98715	0	1	xreddy89	0.79103	0.7769	0.5642	0.875	0.93684	0.96667	0.98777	0	0
50-50	en	reddy	word2vec.run3	cbow	500	lemma	1	0.76942	0.76174	0.55403	0.81013	0.91872	0.9	0.984	0	0	xreddy89	0.76773	0.76081	0.55192	0.81013	0.91893	0.9	0.98405	0	0
50-50	en	reddy	word2vec.run3	cbow	500	lemma	4	0.78719	0.77481	0.56353	0.84848	0.93185	0.93333	0.98672	0	0	xreddy89	0.78669	0.77651	0.56573	0.84848	0.93204	0.93333	0.98676	0	0
50-50	en	reddy	word2vec.run3	cbow	500	lemma	8	0.77824	0.76278	0.55303	0.84536	0.92516	0.93333	0.98529	0	0	xreddy89	0.7784	0.765	0.55601	0.84536	0.92561	0.93333	0.98538	0	0
50-50	en	reddy	word2vec.run3	cbow	500	lemmapos	1	0.76967	0.73103	0.52151	0.83333	0.91422	0.93333	0.98303	3	0	xreddy89	0.77141	0.73667	0.52634	0.83333	0.91636	0.93333	0.98349	3	0
50-50	en	reddy	word2vec.run3	cbow	500	lemmapos	4	0.7626	0.74024	0.53352	0.82927	0.91785	0.9	0.98376	3	0	xreddy89	0.76211	0.74125	0.5335	0.82927	0.91823	0.9	0.98384	3	0
50-50	en	reddy	word2vec.run3	cbow	500	lemmapos	8	0.7831	0.75814	0.54552	0.85714	0.93461	0.93333	0.98725	3	0	xreddy89	0.78396	0.76084	0.54783	0.85714	0.93524	0.93333	0.98739	3	0
50-50	en	reddy	word2vec.run3	cbow	500	surface	1	0.8042	0.79879	0.59505	0.87356	0.94306	0.96667	0.989	0	1	xreddy89	0.8084	0.80778	0.60409	0.88372	0.94701	0.96667	0.98979	0	0
50-50	en	reddy	word2vec.run3	cbow	500	surface	4	0.78597	0.76002	0.54953	0.85393	0.93084	0.96667	0.98653	0	1	xreddy89	0.79007	0.76895	0.55755	0.86364	0.93491	0.96667	0.98737	0	0
50-50	en	reddy	word2vec.run3	cbow	500	surface	8	0.78247	0.7647	0.55503	0.86364	0.93425	0.93333	0.98722	0	1	xreddy89	0.78655	0.77411	0.5642	0.87356	0.93863	0.93333	0.9881	0	0
50-50	en	reddy	word2vec.run3	cbow	500	surface@stoppy	1	0.79205	0.78418	0.57154	0.85714	0.93268	0.96667	0.98689	0	1	xreddy89	0.79619	0.79305	0.58056	0.85714	0.93622	0.96667	0.98762	0	0
50-50	en	reddy	word2vec.run3	cbow	500	surface@stoppy	4	0.79015	0.77843	0.57204	0.825	0.92751	0.96667	0.9859	0	1	xreddy89	0.79428	0.78607	0.57903	0.82759	0.93081	0.96667	0.9866	0	0
50-50	en	reddy	word2vec.run3	cbow	500	surface@stoppy	8	0.78415	0.77579	0.56603	0.84615	0.93117	0.96667	0.98661	0	1	xreddy89	0.78824	0.78395	0.57443	0.85	0.93463	0.96667	0.98733	0	0
50-50	en	reddy	word2vec.run3	skipgram	250	lemma	1	0.73843	0.71837	0.51401	0.81928	0.90385	0.9	0.9808	0	0	xreddy89	0.73816	0.72272	0.51765	0.81928	0.90556	0.9	0.98117	0	0
50-50	en	reddy	word2vec.run3	skipgram	250	lemma	4	0.74103	0.7313	0.52651	0.82474	0.91491	0.93333	0.98311	0	0	xreddy89	0.74092	0.7334	0.5289	0.82474	0.9156	0.93333	0.98326	0	0
50-50	en	reddy	word2vec.run3	skipgram	250	lemma	8	0.73719	0.73239	0.52701	0.83146	0.90712	0.93333	0.98136	0	0	xreddy89	0.73697	0.73331	0.52788	0.83146	0.90748	0.93333	0.98144	0	0
50-50	en	reddy	word2vec.run3	skipgram	250	lemmapos	1	0.75422	0.74479	0.53502	0.83721	0.91737	0.93333	0.98369	3	0	xreddy89	0.75587	0.74976	0.53913	0.83721	0.91926	0.93333	0.9841	3	0
50-50	en	reddy	word2vec.run3	skipgram	250	lemmapos	4	0.74388	0.74244	0.53684	0.82927	0.91287	0.9	0.98266	3	0	xreddy89	0.74488	0.74454	0.53843	0.82927	0.91348	0.9	0.98279	3	0
50-50	en	reddy	word2vec.run3	skipgram	250	lemmapos	8	0.74022	0.74589	0.53852	0.85714	0.91845	0.9	0.98382	3	0	xreddy89	0.7405	0.74742	0.53862	0.85714	0.91908	0.9	0.98396	3	0
50-50	en	reddy	word2vec.run3	skipgram	250	surface	1	0.77471	0.76977	0.56003	0.8642	0.93759	0.93333	0.9878	0	1	xreddy89	0.77875	0.77685	0.56726	0.86667	0.94044	0.93333	0.98837	0	0
50-50	en	reddy	word2vec.run3	skipgram	250	surface	4	0.76348	0.75952	0.55203	0.85714	0.92345	0.93333	0.98491	0	1	xreddy89	0.76747	0.76649	0.55806	0.86667	0.92653	0.93333	0.98554	0	0
50-50	en	reddy	word2vec.run3	skipgram	250	surface	8	0.75189	0.74497	0.53802	0.83146	0.91334	0.9	0.98275	0	1	xreddy89	0.75581	0.75167	0.54425	0.84091	0.91623	0.9	0.98335	0	0
50-50	en	reddy	word2vec.run3	skipgram	250	surface@stoppy	1	0.76739	0.76153	0.54352	0.86076	0.92598	0.96667	0.98555	0	1	xreddy89	0.77139	0.76849	0.5509	0.86076	0.92859	0.96667	0.9861	0	0
50-50	en	reddy	word2vec.run3	skipgram	250	surface@stoppy	4	0.75694	0.75777	0.55253	0.82051	0.91885	0.9	0.98404	0	1	xreddy89	0.76089	0.76395	0.55755	0.82474	0.92162	0.9	0.98463	0	0
50-50	en	reddy	word2vec.run3	skipgram	250	surface@stoppy	8	0.7545	0.75066	0.54652	0.81319	0.9137	0.93333	0.98293	0	1	xreddy89	0.75844	0.75806	0.55396	0.82222	0.91685	0.93333	0.98359	0	0
50-50	en	reddy	word2vec.run3	skipgram	750	lemma	1	0.76842	0.77193	0.56904	0.86667	0.92662	0.93333	0.9855	0	0	xreddy89	0.7675	0.7725	0.56982	0.86667	0.92682	0.93333	0.98554	0	0
50-50	en	reddy	word2vec.run3	skipgram	750	lemma	4	0.79396	0.77788	0.57254	0.83673	0.92749	0.93333	0.98584	0	0	xreddy89	0.79293	0.7787	0.5734	0.83673	0.92791	0.93333	0.98593	0	0
50-50	en	reddy	word2vec.run3	skipgram	750	lemma	8	0.79603	0.78322	0.57554	0.84536	0.93205	0.93333	0.9867	0	0	xreddy89	0.79525	0.78458	0.57698	0.84536	0.93222	0.93333	0.98674	0	0
50-50	en	reddy	word2vec.run3	skipgram	750	lemmapos	1	0.79057	0.76195	0.55353	0.84091	0.93154	0.93333	0.98673	3	0	xreddy89	0.79044	0.76395	0.55499	0.84091	0.93223	0.93333	0.98687	3	0
50-50	en	reddy	word2vec.run3	skipgram	750	lemmapos	4	0.79895	0.77152	0.56403	0.86022	0.93853	0.96667	0.9881	3	0	xreddy89	0.79832	0.77338	0.56471	0.86022	0.93917	0.96667	0.98824	3	0
50-50	en	reddy	word2vec.run3	skipgram	750	lemmapos	8	0.80386	0.78235	0.57404	0.86957	0.93683	0.93333	0.98776	3	0	xreddy89	0.8039	0.78508	0.57647	0.86957	0.93745	0.93333	0.9879	3	0
50-50	en	reddy	word2vec.run3	skipgram	750	surface	1	0.81622	0.81178	0.60455	0.90698	0.94981	0.96667	0.99038	0	1	xreddy89	0.82048	0.82107	0.61381	0.91765	0.95412	0.96667	0.99122	0	0
50-50	en	reddy	word2vec.run3	skipgram	750	surface	4	0.80283	0.78562	0.57404	0.86364	0.94522	1	0.98954	0	1	xreddy89	0.80702	0.79435	0.58261	0.87356	0.94913	1	0.99033	0	0
50-50	en	reddy	word2vec.run3	skipgram	750	surface	8	0.79315	0.77447	0.56453	0.86364	0.93618	0.96667	0.98766	0	1	xreddy89	0.79729	0.78386	0.5734	0.87356	0.94051	0.96667	0.98854	0	0
50-50	en	reddy	word2vec.run3	skipgram	750	surface@stoppy	1	0.79758	0.78138	0.56954	0.87179	0.93608	0.96667	0.98763	0	1	xreddy89	0.80174	0.78965	0.57801	0.87179	0.93902	0.96667	0.98824	0	0
50-50	en	reddy	word2vec.run3	skipgram	750	surface@stoppy	4	0.80053	0.78475	0.57304	0.85366	0.93741	1	0.98795	0	1	xreddy89	0.8047	0.79269	0.58107	0.8642	0.94049	1	0.98858	0	0
50-50	en	reddy	word2vec.run3	skipgram	750	surface@stoppy	8	0.79248	0.77751	0.56904	0.83951	0.93132	0.96667	0.98666	0	1	xreddy89	0.79662	0.78671	0.57801	0.85	0.93543	0.96667	0.9875	0	0
50-50	en	reddy	word2vec.run3	skipgram	500	lemma	1	0.756	0.72291	0.51551	0.80952	0.90753	0.93333	0.98157	0	0	xreddy89	0.75513	0.72412	0.51611	0.80952	0.9082	0.93333	0.98171	0	0
50-50	en	reddy	word2vec.run3	skipgram	500	lemma	4	0.77785	0.76879	0.55653	0.85057	0.9309	0.93333	0.98654	0	0	xreddy89	0.77758	0.77092	0.55857	0.85057	0.9313	0.93333	0.98663	0	0
50-50	en	reddy	word2vec.run3	skipgram	500	lemma	8	0.77622	0.76459	0.55803	0.83333	0.91957	0.93333	0.98409	0	0	xreddy89	0.77621	0.76679	0.56113	0.83333	0.91998	0.93333	0.98418	0	0
50-50	en	reddy	word2vec.run3	skipgram	500	lemmapos	1	0.77202	0.73754	0.52902	0.83333	0.92366	0.93333	0.98502	3	0	xreddy89	0.77343	0.74188	0.53299	0.84	0.92538	0.93333	0.98538	3	0
50-50	en	reddy	word2vec.run3	skipgram	500	lemmapos	4	0.77929	0.76028	0.54884	0.84783	0.92764	0.9	0.98582	3	0	xreddy89	0.77963	0.76271	0.55071	0.84783	0.92825	0.9	0.98595	3	0
50-50	en	reddy	word2vec.run3	skipgram	500	lemmapos	8	0.77871	0.75861	0.54752	0.86957	0.92602	0.93333	0.98544	3	0	xreddy89	0.77904	0.7606	0.54834	0.86957	0.92661	0.93333	0.98557	3	0
50-50	en	reddy	word2vec.run3	skipgram	500	surface	1	0.80467	0.80162	0.59755	0.88636	0.94645	0.96667	0.9897	0	1	xreddy89	0.80887	0.81077	0.60665	0.89655	0.95056	0.96667	0.99051	0	0
50-50	en	reddy	word2vec.run3	skipgram	500	surface	4	0.79709	0.77945	0.57154	0.86667	0.93928	0.96667	0.98825	0	1	xreddy89	0.80125	0.78805	0.58005	0.8764	0.9432	0.96667	0.98903	0	0
50-50	en	reddy	word2vec.run3	skipgram	500	surface	8	0.78666	0.76946	0.55853	0.85	0.93363	0.93333	0.9871	0	1	xreddy89	0.79076	0.77725	0.56573	0.85714	0.93676	0.93333	0.98774	0	0
50-50	en	reddy	word2vec.run3	skipgram	500	surface@stoppy	1	0.78889	0.78718	0.57304	0.86076	0.93991	0.96667	0.98848	0	1	xreddy89	0.79301	0.79484	0.58107	0.86076	0.94293	0.96667	0.9891	0	0
50-50	en	reddy	word2vec.run3	skipgram	500	surface@stoppy	4	0.79111	0.77973	0.56803	0.86364	0.93447	0.96667	0.98729	0	1	xreddy89	0.79524	0.7889	0.57647	0.87356	0.93873	0.96667	0.98816	0	0
50-50	en	reddy	word2vec.run3	skipgram	500	surface@stoppy	8	0.78226	0.77904	0.56904	0.83544	0.92717	0.96667	0.98581	0	1	xreddy89	0.78634	0.7867	0.57698	0.84337	0.93056	0.96667	0.98651	0	0
50-50	en	reddy	minimantics	salehi	1000	lemma	1	0.71017	0.67345	0.47699	0.85714	0.92163	0.93333	0.98454	0	0	xreddy89	0.70652	0.67117	0.47417	0.85714	0.92163	0.93333	0.98454	0	0
50-50	en	reddy	minimantics	salehi	1000	lemma	4	0.69965	0.68204	0.4915	0.82353	0.90571	0.9	0.98075	0	0	xreddy89	0.6965	0.68057	0.48951	0.82353	0.90585	0.9	0.98078	0	0
50-50	en	reddy	minimantics	salehi	1000	lemma	8	0.70585	0.6941	0.5055	0.85393	0.91077	0.9	0.98186	0	0	xreddy89	0.70306	0.69272	0.50384	0.85393	0.91093	0.9	0.98189	0	0
50-50	en	reddy	minimantics	salehi	1000	lemmapos	1	0.7214	0.69003	0.493	0.82759	0.91564	0.93333	0.98324	0	0	xreddy89	0.71808	0.68887	0.49105	0.82759	0.91564	0.93333	0.98324	0	0
50-50	en	reddy	minimantics	salehi	1000	lemmapos	4	0.71595	0.70542	0.506	0.84444	0.91556	0.9	0.98321	0	0	xreddy89	0.71288	0.70438	0.50486	0.84444	0.91556	0.9	0.98321	0	0
50-50	en	reddy	minimantics	salehi	1000	lemmapos	8	0.71667	0.71642	0.51251	0.83516	0.91413	0.93333	0.98297	0	0	xreddy89	0.71394	0.7147	0.51049	0.83516	0.91413	0.93333	0.98297	0	0
50-50	en	reddy	minimantics	salehi	1000	surface	1	0.69619	0.63481	0.44297	0.82222	0.88671	0.93333	0.97638	0	1	xreddy89	0.69983	0.64581	0.45269	0.83146	0.89243	0.93333	0.97761	0	0
50-50	en	reddy	minimantics	salehi	1000	surface	4	0.724	0.68372	0.4895	0.82609	0.90874	0.9	0.98151	0	0	xreddy89	0.72308	0.6811	0.48696	0.82609	0.90874	0.9	0.98151	0	0
50-50	en	reddy	minimantics	salehi	1000	surface	8	0.73526	0.70119	0.5015	0.84706	0.91427	0.9	0.98271	0	0	xreddy89	0.73566	0.69867	0.49923	0.84706	0.91427	0.9	0.98271	0	0
50-50	en	reddy	minimantics	salehi	1000	surface@stoppy	1	0.66945	0.60762	0.43047	0.7767	0.84837	0.86667	0.96544	0	1	xreddy89	0.67294	0.61917	0.43939	0.78431	0.85403	0.86667	0.96673	0	0
50-50	en	reddy	minimantics	salehi	1000	surface@stoppy	4	0.69985	0.66798	0.47549	0.84091	0.90086	0.9	0.97964	0	0	xreddy89	0.69785	0.66471	0.47263	0.84091	0.90086	0.9	0.97964	0	0
50-50	en	reddy	minimantics	salehi	1000	surface@stoppy	8	0.72007	0.68597	0.48699	0.83516	0.9089	0.9	0.98168	0	0	xreddy89	0.71902	0.68281	0.4844	0.83516	0.9089	0.9	0.98168	0	0
50-50	en	reddy	minimantics	PPMIthreshold	250	lemma	1	0.74182	0.7661	0.56653	0.84706	0.92027	0.93333	0.98419	0	0	xreddy89	0.74192	0.77105	0.57033	0.84706	0.92234	0.93333	0.98462	0	0
50-50	en	reddy	minimantics	PPMIthreshold	250	lemma	4	0.72499	0.74783	0.55653	0.85057	0.90515	0.9	0.97978	0	0	xreddy89	0.72372	0.74934	0.55755	0.85057	0.90578	0.9	0.97991	0	0
50-50	en	reddy	minimantics	PPMIthreshold	250	lemma	8	0.71857	0.74465	0.54953	0.86047	0.90361	0.9	0.97917	0	0	xreddy89	0.717	0.74526	0.54987	0.86047	0.90398	0.9	0.97925	0	0
50-50	en	reddy	minimantics	PPMIthreshold	250	lemmapos	1	0.74625	0.77222	0.57354	0.84706	0.92529	0.93333	0.98525	0	0	xreddy89	0.74602	0.77651	0.57698	0.84706	0.92707	0.93333	0.98561	0	0
50-50	en	reddy	minimantics	PPMIthreshold	250	lemmapos	4	0.73149	0.75785	0.56353	0.85714	0.905	0.9	0.9801	0	0	xreddy89	0.73032	0.75926	0.56368	0.85714	0.90594	0.9	0.9803	0	0
50-50	en	reddy	minimantics	PPMIthreshold	250	lemmapos	8	0.73117	0.75719	0.56403	0.85106	0.90819	0.9	0.98067	0	0	xreddy89	0.72968	0.75813	0.5642	0.85106	0.90882	0.9	0.98081	0	0
50-50	en	reddy	minimantics	PPMIthreshold	250	surface	1	0.70618	0.74765	0.54752	0.86747	0.92266	0.93333	0.98446	0	0	xreddy89	0.71012	0.76083	0.55908	0.87805	0.93032	0.96667	0.98605	0	0
50-50	en	reddy	minimantics	PPMIthreshold	250	surface	4	0.73147	0.75358	0.55703	0.85106	0.92362	0.93333	0.98485	0	0	xreddy89	0.72942	0.75245	0.55448	0.85106	0.92379	0.93333	0.98489	0	0
50-50	en	reddy	minimantics	PPMIthreshold	250	surface	8	0.74678	0.75365	0.55903	0.84337	0.92541	0.93333	0.98529	0	0	xreddy89	0.74441	0.75235	0.55755	0.84337	0.92541	0.93333	0.98529	0	0
50-50	en	reddy	minimantics	PPMIthreshold	250	surface@stoppy	1	0.67637	0.70842	0.50851	0.88636	0.92613	0.9	0.98483	0	1	xreddy89	0.6799	0.72202	0.51918	0.89655	0.93406	0.93333	0.98646	0	0
50-50	en	reddy	minimantics	PPMIthreshold	250	surface@stoppy	4	0.71744	0.74853	0.54252	0.84783	0.91589	0.9	0.98312	0	0	xreddy89	0.71603	0.75036	0.54373	0.84783	0.91673	0.9	0.98331	0	0
50-50	en	reddy	minimantics	PPMIthreshold	250	surface@stoppy	8	0.73627	0.75027	0.55085	0.83951	0.92186	0.93333	0.98445	0	0	xreddy89	0.73412	0.74962	0.54918	0.83951	0.92202	0.93333	0.98448	0	0
50-50	en	reddy	minimantics	PPMIthreshold	750	lemma	1	0.72012	0.75375	0.54752	0.86667	0.92561	0.9	0.98495	0	0	xreddy89	0.71864	0.75476	0.54834	0.86667	0.92613	0.9	0.98505	0	0
50-50	en	reddy	minimantics	PPMIthreshold	750	lemma	4	0.75397	0.77853	0.57554	0.88421	0.94361	0.93333	0.98906	0	0	xreddy89	0.75308	0.78017	0.57596	0.88421	0.94392	0.93333	0.98912	0	0
50-50	en	reddy	minimantics	PPMIthreshold	750	lemma	8	0.76041	0.79355	0.59487	0.89362	0.94657	0.93333	0.98955	0	0	xreddy89	0.75934	0.79417	0.59471	0.89362	0.94657	0.93333	0.98955	0	0
50-50	en	reddy	minimantics	PPMIthreshold	750	lemmapos	1	0.73124	0.77028	0.57304	0.86957	0.92414	0.93333	0.98494	0	0	xreddy89	0.73043	0.77217	0.57494	0.86957	0.92478	0.93333	0.98508	0	0
50-50	en	reddy	minimantics	PPMIthreshold	750	lemmapos	4	0.76385	0.78809	0.59005	0.87912	0.93766	0.93333	0.98781	0	0	xreddy89	0.76349	0.79061	0.59233	0.87912	0.93847	0.93333	0.98797	0	0
50-50	en	reddy	minimantics	PPMIthreshold	750	lemmapos	8	0.76684	0.79512	0.60155	0.89888	0.94378	0.93333	0.98903	0	0	xreddy89	0.76626	0.79689	0.60358	0.89888	0.94425	0.93333	0.98913	0	0
50-50	en	reddy	minimantics	PPMIthreshold	750	surface	1	0.71064	0.72568	0.52201	0.83871	0.91925	0.93333	0.98378	0	0	xreddy89	0.71049	0.73272	0.52737	0.84783	0.9222	0.93333	0.98439	0	0
50-50	en	reddy	minimantics	PPMIthreshold	750	surface	4	0.75701	0.78272	0.58154	0.8642	0.94419	0.93333	0.98922	0	0	xreddy89	0.75458	0.78195	0.58056	0.8642	0.94419	0.93333	0.98922	0	0
50-50	en	reddy	minimantics	PPMIthreshold	750	surface	8	0.76778	0.80303	0.60355	0.88636	0.94554	0.93333	0.98949	0	0	xreddy89	0.76525	0.80209	0.60358	0.88636	0.94554	0.93333	0.98949	0	0
50-50	en	reddy	minimantics	PPMIthreshold	750	surface@stoppy	1	0.69392	0.71127	0.51001	0.87059	0.92328	0.9	0.98454	0	1	xreddy89	0.69754	0.72471	0.52072	0.88095	0.93097	0.93333	0.98613	0	0
50-50	en	reddy	minimantics	PPMIthreshold	750	surface@stoppy	4	0.72967	0.74243	0.53602	0.85714	0.92736	0.93333	0.98556	0	0	xreddy89	0.72752	0.74195	0.53504	0.85714	0.92751	0.93333	0.98559	0	0
50-50	en	reddy	minimantics	PPMIthreshold	750	surface@stoppy	8	0.74889	0.77709	0.57204	0.86364	0.93838	0.93333	0.98798	0	0	xreddy89	0.74636	0.77576	0.57033	0.86364	0.93838	0.93333	0.98798	0	0
50-50	en	reddy	minimantics	PPMIthreshold	500	lemma	1	0.72604	0.76466	0.56035	0.85106	0.92987	0.9	0.98615	0	0	xreddy89	0.72516	0.76704	0.56299	0.85106	0.93068	0.9	0.98631	0	0
50-50	en	reddy	minimantics	PPMIthreshold	500	lemma	4	0.7539	0.77425	0.57354	0.87234	0.941	0.93333	0.98836	0	0	xreddy89	0.75292	0.77619	0.57443	0.87234	0.94161	0.93333	0.98848	0	0
50-50	en	reddy	minimantics	PPMIthreshold	500	lemma	8	0.74497	0.7774	0.57754	0.87234	0.92797	0.9	0.98554	0	0	xreddy89	0.74368	0.77871	0.57852	0.87234	0.92846	0.9	0.98564	0	0
50-50	en	reddy	minimantics	PPMIthreshold	500	lemmapos	1	0.73983	0.77106	0.56954	0.87356	0.92848	0.93333	0.98587	0	0	xreddy89	0.7389	0.77256	0.57084	0.87356	0.92916	0.93333	0.98602	0	0
50-50	en	reddy	minimantics	PPMIthreshold	500	lemmapos	4	0.75859	0.78518	0.58654	0.86747	0.93613	0.93333	0.9875	0	0	xreddy89	0.75851	0.78949	0.59131	0.86747	0.93775	0.93333	0.98782	0	0
50-50	en	reddy	minimantics	PPMIthreshold	500	lemmapos	8	0.76078	0.79329	0.60355	0.87356	0.93013	0.9	0.98604	0	0	xreddy89	0.75962	0.7933	0.60256	0.87356	0.93034	0.9	0.98609	0	0
50-50	en	reddy	minimantics	PPMIthreshold	500	surface	1	0.70824	0.73016	0.53102	0.83544	0.91995	0.93333	0.98403	0	0	xreddy89	0.70931	0.73864	0.53862	0.83951	0.92335	0.93333	0.98474	0	0
50-50	en	reddy	minimantics	PPMIthreshold	500	surface	4	0.74935	0.79033	0.58604	0.86747	0.94297	0.93333	0.98897	0	0	xreddy89	0.74697	0.78959	0.58568	0.86747	0.94297	0.93333	0.98897	0	0
50-50	en	reddy	minimantics	PPMIthreshold	500	surface	8	0.75325	0.78962	0.59505	0.86598	0.93807	0.93333	0.98788	0	0	xreddy89	0.75067	0.78823	0.59386	0.86598	0.93807	0.93333	0.98788	0	0
50-50	en	reddy	minimantics	PPMIthreshold	500	surface@stoppy	1	0.68546	0.7021	0.5035	0.86747	0.91938	0.9	0.98359	0	1	xreddy89	0.68904	0.71535	0.51356	0.87805	0.927	0.93333	0.98518	0	0
50-50	en	reddy	minimantics	PPMIthreshold	500	surface@stoppy	4	0.72245	0.76056	0.55703	0.85714	0.93133	0.93333	0.98647	0	0	xreddy89	0.72068	0.76077	0.55652	0.85714	0.93168	0.93333	0.98655	0	0
50-50	en	reddy	minimantics	PPMIthreshold	500	surface@stoppy	8	0.7456	0.79153	0.58855	0.86957	0.94041	0.93333	0.9884	0	0	xreddy89	0.7432	0.79093	0.58824	0.86957	0.94041	0.93333	0.9884	0	0
50-50	en	reddy	dissect	svd	250	lemma	1	0.70661	0.71054	0.52401	0.80435	0.86283	0.8	0.96998	0	0	xreddy89	0.70637	0.71092	0.5243	0.80808	0.86412	0.8	0.97026	0	0
50-50	en	reddy	dissect	svd	250	lemma	4	0.69442	0.69484	0.50901	0.78652	0.84888	0.8	0.9668	0	0	xreddy89	0.69421	0.6958	0.50895	0.78652	0.85031	0.8	0.96711	0	0
50-50	en	reddy	dissect	svd	250	lemma	8	0.70471	0.70241	0.51501	0.80808	0.86179	0.8	0.96983	0	0	xreddy89	0.70321	0.7006	0.51253	0.80808	0.86237	0.8	0.96996	0	0
50-50	en	reddy	dissect	svd	250	lemmapos	1	0.71205	0.70922	0.51901	0.80488	0.86446	0.83333	0.96973	0	0	xreddy89	0.71007	0.70672	0.51611	0.80488	0.86464	0.83333	0.96977	0	0
50-50	en	reddy	dissect	svd	250	lemmapos	4	0.6908	0.68596	0.4915	0.81319	0.85798	0.83333	0.96801	0	0	xreddy89	0.6878	0.68304	0.48849	0.81319	0.85798	0.83333	0.96801	0	0
50-50	en	reddy	dissect	svd	250	lemmapos	8	0.6776	0.66603	0.47599	0.78723	0.85373	0.83333	0.96745	0	0	xreddy89	0.67552	0.66496	0.47468	0.78723	0.85417	0.83333	0.96754	0	0
50-50	en	reddy	dissect	svd	250	surface	1	0.72196	0.72984	0.53102	0.83333	0.88648	0.83333	0.97488	0	0	xreddy89	0.71929	0.72653	0.52685	0.83333	0.88666	0.83333	0.97492	0	0
50-50	en	reddy	dissect	svd	250	surface	4	0.71853	0.71584	0.51201	0.80899	0.87352	0.83333	0.97244	0	0	xreddy89	0.71527	0.7125	0.511	0.80899	0.87352	0.83333	0.97244	0	0
50-50	en	reddy	dissect	svd	250	surface	8	0.7161	0.71535	0.51251	0.80899	0.87807	0.86667	0.97383	0	0	xreddy89	0.71401	0.71141	0.51049	0.80899	0.87807	0.86667	0.97383	0	0
50-50	en	reddy	dissect	svd	250	surface@stoppy	1	0.73036	0.73828	0.54402	0.84706	0.91448	0.93333	0.98138	0	0	xreddy89	0.73418	0.7459	0.5509	0.85714	0.91818	0.93333	0.98213	0	0
50-50	en	reddy	dissect	svd	250	surface@stoppy	4	0.72076	0.72247	0.51601	0.82759	0.8852	0.86667	0.9742	0	0	xreddy89	0.71745	0.71894	0.51253	0.82759	0.8852	0.86667	0.9742	0	0
50-50	en	reddy	dissect	svd	250	surface@stoppy	8	0.71668	0.71983	0.51551	0.81818	0.87412	0.83333	0.97177	0	0	xreddy89	0.71337	0.71629	0.51407	0.81818	0.87412	0.83333	0.97177	0	0
50-50	en	reddy	dissect	svd	750	lemma	1	0.71874	0.73876	0.54602	0.81188	0.87008	0.86667	0.97105	0	0	xreddy89	0.71924	0.74281	0.54987	0.82	0.87282	0.86667	0.97162	0	0
50-50	en	reddy	dissect	svd	750	lemma	4	0.75017	0.76353	0.56453	0.82828	0.88396	0.86667	0.97524	0	0	xreddy89	0.74884	0.76283	0.5642	0.83168	0.88445	0.86667	0.97534	0	0
50-50	en	reddy	dissect	svd	750	lemma	8	0.77554	0.79146	0.59205	0.84211	0.90488	0.9	0.98002	0	0	xreddy89	0.77363	0.7896	0.59028	0.84211	0.90488	0.9	0.98002	0	0
50-50	en	reddy	dissect	svd	750	lemmapos	1	0.71357	0.71465	0.52251	0.81395	0.86847	0.83333	0.97043	0	0	xreddy89	0.71137	0.71172	0.51816	0.81395	0.86864	0.83333	0.97047	0	0
50-50	en	reddy	dissect	svd	750	lemmapos	4	0.69681	0.69522	0.5	0.82353	0.86918	0.86667	0.97094	0	0	xreddy89	0.69393	0.69239	0.49719	0.82353	0.86918	0.86667	0.97094	0	0
50-50	en	reddy	dissect	svd	750	lemmapos	8	0.71191	0.6914	0.495	0.80435	0.87872	0.83333	0.97403	0	0	xreddy89	0.70969	0.68997	0.4931	0.80435	0.87892	0.83333	0.97407	0	0
50-50	en	reddy	dissect	svd	750	surface	1	0.70629	0.71201	0.51451	0.85057	0.88205	0.9	0.97352	0	0	xreddy89	0.70735	0.7151	0.51816	0.85057	0.88359	0.9	0.97385	0	0
50-50	en	reddy	dissect	svd	750	surface	4	0.71735	0.71417	0.51401	0.80952	0.87646	0.86667	0.97311	0	0	xreddy89	0.7138	0.71119	0.51304	0.80952	0.87658	0.86667	0.97315	0	0
50-50	en	reddy	dissect	svd	750	surface	8	0.74108	0.73211	0.53552	0.82759	0.8875	0.9	0.97585	0	0	xreddy89	0.73803	0.7288	0.53402	0.82759	0.8875	0.9	0.97585	0	0
50-50	en	reddy	dissect	svd	750	surface@stoppy	1	0.72743	0.72766	0.53552	0.85714	0.9034	0.93333	0.97846	0	0	xreddy89	0.73123	0.73629	0.54373	0.86747	0.90765	0.93333	0.97932	0	0
50-50	en	reddy	dissect	svd	750	surface@stoppy	4	0.71318	0.70958	0.5035	0.82222	0.87721	0.86667	0.97287	0	0	xreddy89	0.71049	0.70651	0.49974	0.82222	0.87754	0.86667	0.97294	0	0
50-50	en	reddy	dissect	svd	750	surface@stoppy	8	0.71864	0.71095	0.51451	0.80412	0.87172	0.86667	0.97168	0	0	xreddy89	0.71513	0.70738	0.51304	0.80412	0.87172	0.86667	0.97168	0	0
50-50	en	reddy	dissect	svd	500	lemma	1	0.72021	0.73184	0.54352	0.80435	0.86836	0.83333	0.97088	0	0	xreddy89	0.72066	0.73378	0.54578	0.80435	0.86997	0.83333	0.97122	0	0
50-50	en	reddy	dissect	svd	500	lemma	4	0.73099	0.74096	0.54302	0.82828	0.8724	0.9	0.97227	0	0	xreddy89	0.73017	0.73942	0.54118	0.83168	0.87287	0.9	0.97237	0	0
50-50	en	reddy	dissect	svd	500	lemma	8	0.75382	0.75689	0.56153	0.83673	0.89183	0.9	0.97708	0	0	xreddy89	0.75213	0.75601	0.56164	0.83673	0.89206	0.9	0.97713	0	0
50-50	en	reddy	dissect	svd	500	lemmapos	1	0.72104	0.71975	0.52801	0.81319	0.87301	0.83333	0.97186	0	0	xreddy89	0.71884	0.71687	0.52379	0.81319	0.87318	0.83333	0.9719	0	0
50-50	en	reddy	dissect	svd	500	lemmapos	4	0.69993	0.69478	0.499	0.82353	0.87133	0.83333	0.97137	0	0	xreddy89	0.69682	0.69238	0.49616	0.82353	0.87133	0.83333	0.97137	0	0
50-50	en	reddy	dissect	svd	500	lemmapos	8	0.70738	0.69294	0.498	0.80899	0.874	0.83333	0.97253	0	0	xreddy89	0.70498	0.69172	0.49668	0.80899	0.8742	0.83333	0.97257	0	0
50-50	en	reddy	dissect	svd	500	surface	1	0.72037	0.72167	0.52301	0.83721	0.89033	0.9	0.97565	0	0	xreddy89	0.72015	0.72206	0.52379	0.83721	0.89125	0.9	0.97585	0	0
50-50	en	reddy	dissect	svd	500	surface	4	0.72121	0.71641	0.51301	0.80851	0.8741	0.86667	0.97262	0	0	xreddy89	0.71781	0.71289	0.51202	0.80851	0.8741	0.86667	0.97262	0	0
50-50	en	reddy	dissect	svd	500	surface	8	0.72813	0.71613	0.51851	0.8	0.8803	0.9	0.97456	0	0	xreddy89	0.72527	0.71238	0.51662	0.8	0.8803	0.9	0.97456	0	0
50-50	en	reddy	dissect	svd	500	surface@stoppy	1	0.73231	0.73428	0.54052	0.84783	0.90726	0.93333	0.97941	0	0	xreddy89	0.73613	0.74231	0.54834	0.85714	0.91088	0.93333	0.98015	0	0
50-50	en	reddy	dissect	svd	500	surface@stoppy	4	0.71632	0.70951	0.5065	0.82222	0.87856	0.9	0.97274	0	0	xreddy89	0.71368	0.70572	0.5023	0.82222	0.87872	0.9	0.97278	0	0
50-50	en	reddy	dissect	svd	500	surface@stoppy	8	0.71704	0.71599	0.51251	0.8	0.87206	0.86667	0.97179	0	0	xreddy89	0.71364	0.71227	0.511	0.8	0.87206	0.86667	0.97179	0	0
50-50	en	reddy	glove.avg	default	250	lemma	1	0.693273	0.64746	0.445473	0.828087	0.909393	0.9	0.98195	0	0	xreddy89	0.702957	0.660603	0.45627	0.837917	0.916907	0.93333	0.983567	0	0
50-50	en	reddy	glove.avg	default	250	lemma	4	0.76146	0.71131	0.506503	0.835507	0.921047	0.96667	0.984483	0	0	xreddy89	0.761387	0.714583	0.508953	0.83669	0.922297	0.96667	0.984747	0	0
50-50	en	reddy	glove.avg	default	250	lemma	8	0.77281	0.729767	0.520843	0.845057	0.93116	0.944443	0.986593	0	0	xreddy89	0.772173	0.7321	0.52208	0.845057	0.931917	0.944443	0.986753	0	0
50-50	en	reddy	glove.avg	default	250	lemmapos	1	0.690703	0.649273	0.457647	0.805617	0.89894	0.88889	0.979673	3	0	xreddy89	0.703577	0.662413	0.468543	0.81425	0.906463	0.9	0.981327	3	0
50-50	en	reddy	glove.avg	default	250	lemmapos	4	0.771477	0.727843	0.52518	0.836523	0.924977	0.93333	0.985293	3	0	xreddy89	0.77575	0.737257	0.533677	0.845823	0.929603	0.93333	0.98625	3	0
50-50	en	reddy	glove.avg	default	250	lemmapos	8	0.786387	0.757187	0.555363	0.840113	0.92532	0.93333	0.985367	3	0	xreddy89	0.78712	0.761033	0.55959	0.841347	0.92679	0.93333	0.985673	3	0
50-50	en	reddy	glove.avg	default	250	surface	1	0.714213	0.635437	0.444807	0.81633	0.91151	0.92222	0.98243	0	1	xreddy89	0.71794	0.644923	0.452007	0.82474	0.915527	0.92222	0.98329	0	0
50-50	en	reddy	glove.avg	default	250	surface	4	0.756043	0.69743	0.493833	0.847	0.91997	0.92222	0.98423	0	1	xreddy89	0.75999	0.705847	0.50094	0.85614	0.92389	0.92222	0.985043	0	0
50-50	en	reddy	glove.avg	default	250	surface	8	0.526543	0.50895	0.364767	0.77983	0.7852	0.799997	0.91504	0	1	xreddy89	0.529293	0.514753	0.369823	0.788067	0.789417	0.799997	0.915977	0	0
50-50	en	reddy	glove.avg	default	250	surface@stoppy	1	0.67384	0.602127	0.412957	0.795123	0.888713	0.86667	0.977373	0	1	xreddy89	0.677357	0.612657	0.421653	0.80464	0.89358	0.86667	0.97844	0	0
50-50	en	reddy	glove.avg	default	250	surface@stoppy	4	0.73552	0.661973	0.461147	0.83956	0.921723	0.955557	0.984573	0	1	xreddy89	0.739363	0.670537	0.468203	0.84887	0.92549	0.955557	0.98535	0	0
50-50	en	reddy	glove.avg	default	250	surface@stoppy	8	0.725463	0.676697	0.47599	0.83377	0.921923	0.944443	0.984643	0	1	xreddy89	0.72925	0.684897	0.483037	0.84357	0.925463	0.944443	0.98538	0	0
50-50	en	reddy	glove.avg	default	750	lemma	1	0.684987	0.637717	0.438803	0.815933	0.904557	0.9	0.98089	0	0	xreddy89	0.694403	0.650837	0.449277	0.825863	0.911933	0.93333	0.982487	0	0
50-50	en	reddy	glove.avg	default	750	lemma	4	0.742403	0.684983	0.480823	0.837593	0.9146	0.96667	0.983073	0	0	xreddy89	0.741927	0.687447	0.482527	0.837593	0.915393	0.96667	0.983243	0	0
50-50	en	reddy	glove.avg	default	750	lemma	8	0.752517	0.698097	0.492167	0.831933	0.915897	0.93333	0.983363	0	0	xreddy89	0.75177	0.70046	0.49378	0.831933	0.9167	0.93333	0.98354	0	0
50-50	en	reddy	glove.avg	default	750	lemmapos	1	0.678893	0.640713	0.45181	0.800013	0.895613	0.9	0.97896	3	0	xreddy89	0.689317	0.653553	0.462407	0.808377	0.902487	0.92222	0.980473	3	0
50-50	en	reddy	glove.avg	default	750	lemmapos	4	0.754213	0.71112	0.508507	0.830003	0.914897	0.93333	0.98314	3	0	xreddy89	0.757413	0.7175	0.514577	0.8392	0.91761	0.93333	0.983717	3	0
50-50	en	reddy	glove.avg	default	750	lemmapos	8	0.770767	0.7321	0.528683	0.833317	0.91422	0.93333	0.983003	3	0	xreddy89	0.77174	0.73664	0.533503	0.83641	0.915817	0.93333	0.983343	3	0
50-50	en	reddy	glove.avg	default	750	surface	1	0.70757	0.64154	0.450143	0.813293	0.904717	0.91111	0.98095	0	1	xreddy89	0.711263	0.651047	0.45729	0.822337	0.909093	0.91111	0.981883	0	0
50-50	en	reddy	glove.avg	default	750	surface	4	0.754343	0.69863	0.499333	0.84479	0.919697	0.9	0.984147	0	1	xreddy89	0.75828	0.706777	0.506567	0.854037	0.92345	0.9	0.984923	0	0
50-50	en	reddy	glove.avg	default	750	surface	8	0.75444	0.696037	0.497167	0.848627	0.92045	0.9	0.984253	0	1	xreddy89	0.75838	0.70368	0.50401	0.858393	0.92388	0.9	0.98496	0	0
50-50	en	reddy	glove.avg	default	750	surface@stoppy	1	0.68633	0.60905	0.420123	0.80488	0.89076	0.86667	0.977813	0	1	xreddy89	0.68991	0.61858	0.428303	0.81481	0.895007	0.86667	0.978737	0	0
50-50	en	reddy	glove.avg	default	750	surface@stoppy	4	0.724217	0.660643	0.46098	0.84253	0.915857	0.9	0.983283	0	1	xreddy89	0.727997	0.66881	0.46803	0.851897	0.919183	0.9	0.983973	0	0
50-50	en	reddy	glove.avg	default	750	surface@stoppy	8	0.715027	0.670107	0.471653	0.825937	0.914	0.91111	0.982943	0	1	xreddy89	0.718763	0.677283	0.47775	0.831807	0.916823	0.91111	0.983543	0	0
50-50	en	reddy	glove.avg	default	500	lemma	1	0.688983	0.64056	0.441637	0.815437	0.902977	0.9	0.980557	0	0	xreddy89	0.69759	0.653447	0.452173	0.824957	0.909977	0.92222	0.982077	0	0
50-50	en	reddy	glove.avg	default	500	lemma	4	0.74941	0.698567	0.4965	0.84175	0.91896	0.96667	0.984027	0	0	xreddy89	0.748717	0.700823	0.49787	0.84175	0.91981	0.96667	0.984213	0	0
50-50	en	reddy	glove.avg	default	500	lemma	8	0.76176	0.71356	0.50717	0.83146	0.920617	0.93333	0.984377	0	0	xreddy89	0.760877	0.715827	0.50878	0.83146	0.921367	0.93333	0.98454	0	0
50-50	en	reddy	glove.avg	default	500	lemmapos	1	0.682983	0.643987	0.450343	0.81648	0.899683	0.9	0.979827	3	0	xreddy89	0.693817	0.656827	0.46074	0.825757	0.9067	0.92222	0.98136	3	0
50-50	en	reddy	glove.avg	default	500	lemmapos	4	0.764917	0.717497	0.513613	0.832853	0.91743	0.93333	0.983677	3	0	xreddy89	0.76844	0.723967	0.51997	0.83921	0.920167	0.93333	0.984253	3	0
50-50	en	reddy	glove.avg	default	500	lemmapos	8	0.778943	0.74298	0.54052	0.83468	0.918957	0.93333	0.984017	3	0	xreddy89	0.7799	0.747833	0.54595	0.83776	0.920747	0.93333	0.984397	3	0
50-50	en	reddy	glove.avg	default	500	surface	1	0.70937	0.637117	0.446807	0.818873	0.90644	0.9	0.981323	0	1	xreddy89	0.713073	0.646577	0.45405	0.827203	0.910637	0.9	0.98222	0	0
50-50	en	reddy	glove.avg	default	500	surface	4	0.759887	0.703523	0.504167	0.84783	0.92129	0.92222	0.98451	0	1	xreddy89	0.763857	0.711383	0.51066	0.85714	0.925037	0.92222	0.985287	0	0
50-50	en	reddy	glove.avg	default	500	surface	8	0.758867	0.701033	0.502167	0.839443	0.920167	0.9	0.98424	0	1	xreddy89	0.762827	0.709743	0.509803	0.848743	0.924357	0.9	0.985103	0	0
50-50	en	reddy	glove.avg	default	500	surface@stoppy	1	0.672217	0.59559	0.40612	0.798393	0.89244	0.86667	0.97821	0	1	xreddy89	0.67573	0.60549	0.413983	0.807973	0.896717	0.86667	0.97914	0	0
50-50	en	reddy	glove.avg	default	500	surface@stoppy	4	0.729857	0.66201	0.462983	0.83762	0.917987	0.9	0.98376	0	1	xreddy89	0.733667	0.6703	0.469907	0.845923	0.92147	0.9	0.984483	0	0
50-50	en	reddy	glove.avg	default	500	surface@stoppy	8	0.715967	0.673483	0.47282	0.82495	0.91657	0.91111	0.983513	0	1	xreddy89	0.719707	0.680997	0.478943	0.829123	0.919587	0.91111	0.98415	0	0
50-50	en	reddy	glove.run1	default	250	lemma	1	0.6925	0.64404	0.43947	0.83146	0.90775	0.9	0.98159	0	0	xreddy89	0.70241	0.65711	0.45013	0.84091	0.91522	0.93333	0.9832	0	0
50-50	en	reddy	glove.run1	default	250	lemma	4	0.76025	0.70967	0.5055	0.84783	0.92151	0.96667	0.98457	0	0	xreddy89	0.75982	0.71212	0.50691	0.84783	0.92239	0.96667	0.98476	0	0
50-50	en	reddy	glove.run1	default	250	lemma	8	0.7738	0.7314	0.52051	0.83951	0.93012	0.93333	0.9864	0	0	xreddy89	0.77331	0.73499	0.52327	0.83951	0.93142	0.93333	0.98667	0	0
50-50	en	reddy	glove.run1	default	250	lemmapos	1	0.69244	0.65165	0.46198	0.80435	0.8981	0.9	0.97948	3	0	xreddy89	0.70612	0.66513	0.47315	0.81319	0.90589	0.9	0.9812	3	0
50-50	en	reddy	glove.run1	default	250	lemmapos	4	0.76862	0.72454	0.52301	0.83673	0.9258	0.93333	0.98546	3	0	xreddy89	0.77293	0.73382	0.53146	0.84536	0.93045	0.93333	0.98642	3	0
50-50	en	reddy	glove.run1	default	250	lemmapos	8	0.7871	0.75861	0.55553	0.84444	0.92634	0.93333	0.98557	3	0	xreddy89	0.78747	0.76232	0.55959	0.84444	0.92772	0.93333	0.98586	3	0
50-50	en	reddy	glove.run1	default	250	surface	1	0.71353	0.63659	0.44297	0.81633	0.91294	0.93333	0.98274	0	1	xreddy89	0.71725	0.64612	0.45013	0.82474	0.91695	0.93333	0.9836	0	0
50-50	en	reddy	glove.run1	default	250	surface	4	0.75744	0.69576	0.4905	0.85106	0.92249	0.93333	0.98477	0	1	xreddy89	0.76139	0.70405	0.49719	0.86022	0.92644	0.93333	0.98559	0	0
50-50	en	reddy	glove.run1	default	250	surface	8	0.76893	0.71028	0.51101	0.84091	0.92188	0.93333	0.98464	0	1	xreddy89	0.77295	0.71863	0.51816	0.85057	0.92586	0.93333	0.98546	0	0
50-50	en	reddy	glove.run1	default	250	surface@stoppy	1	0.67338	0.59961	0.40745	0.8	0.89005	0.86667	0.9777	0	1	xreddy89	0.67689	0.61041	0.41637	0.80899	0.89534	0.86667	0.97886	0	0
50-50	en	reddy	glove.run1	default	250	surface@stoppy	4	0.74058	0.66707	0.46848	0.84444	0.92547	0.96667	0.98536	0	1	xreddy89	0.74445	0.67611	0.47622	0.85393	0.9295	0.96667	0.98619	0	0
50-50	en	reddy	glove.run1	default	250	surface@stoppy	8	0.74983	0.6858	0.48349	0.82927	0.92159	0.93333	0.98458	0	1	xreddy89	0.75374	0.69425	0.49054	0.83951	0.92552	0.93333	0.98539	0	0
50-50	en	reddy	glove.run1	default	750	lemma	1	0.68146	0.641	0.44647	0.81818	0.90184	0.9	0.98029	0	0	xreddy89	0.692	0.65473	0.45729	0.82759	0.90992	0.93333	0.98206	0	0
50-50	en	reddy	glove.run1	default	750	lemma	4	0.74938	0.69309	0.48649	0.82979	0.91852	0.96667	0.98392	0	0	xreddy89	0.74851	0.69559	0.48798	0.82979	0.91932	0.96667	0.98409	0	0
50-50	en	reddy	glove.run1	default	750	lemma	8	0.75477	0.69588	0.492	0.84783	0.91699	0.93333	0.98358	0	0	xreddy89	0.75398	0.69815	0.49361	0.84783	0.91779	0.93333	0.98376	0	0
50-50	en	reddy	glove.run1	default	750	lemmapos	1	0.6771	0.63569	0.44898	0.80412	0.89359	0.9	0.97852	3	0	xreddy89	0.68709	0.64836	0.45934	0.8125	0.90037	0.93333	0.98002	3	0
50-50	en	reddy	glove.run1	default	750	lemmapos	4	0.75528	0.71505	0.51001	0.82353	0.91492	0.93333	0.98318	3	0	xreddy89	0.7585	0.72143	0.51611	0.83333	0.91759	0.93333	0.98375	3	0
50-50	en	reddy	glove.run1	default	750	lemmapos	8	0.7735	0.73501	0.53152	0.83333	0.9158	0.93333	0.98336	3	0	xreddy89	0.77526	0.74003	0.53657	0.83333	0.9177	0.93333	0.98376	3	0
50-50	en	reddy	glove.run1	default	750	surface	1	0.71384	0.64643	0.45748	0.81818	0.9066	0.9	0.98137	0	1	xreddy89	0.71757	0.6558	0.46445	0.82759	0.91069	0.9	0.98224	0	0
50-50	en	reddy	glove.run1	default	750	surface	4	0.75366	0.6994	0.5005	0.83871	0.92	0.9	0.98421	0	1	xreddy89	0.75759	0.70779	0.50793	0.84783	0.92396	0.9	0.98503	0	0
50-50	en	reddy	glove.run1	default	750	surface	8	0.75446	0.69802	0.5	0.85714	0.92142	0.9	0.98442	0	1	xreddy89	0.7584	0.70573	0.50691	0.86747	0.92491	0.9	0.98514	0	0
50-50	en	reddy	glove.run1	default	750	surface@stoppy	1	0.69256	0.61453	0.42646	0.80488	0.89128	0.86667	0.97792	0	1	xreddy89	0.69617	0.62412	0.43478	0.81481	0.89559	0.86667	0.97885	0	0
50-50	en	reddy	glove.run1	default	750	surface@stoppy	4	0.72725	0.671	0.46899	0.83871	0.91991	0.9	0.98417	0	1	xreddy89	0.73105	0.67936	0.47673	0.84783	0.9232	0.9	0.98485	0	0
50-50	en	reddy	glove.run1	default	750	surface@stoppy	8	0.73598	0.67925	0.48099	0.83951	0.91775	0.9	0.98372	0	1	xreddy89	0.73983	0.6866	0.48747	0.83951	0.92052	0.9	0.9843	0	0
50-50	en	reddy	glove.run1	default	500	lemma	1	0.6947	0.64682	0.44347	0.81818	0.90773	0.9	0.98159	0	0	xreddy89	0.70293	0.65957	0.45371	0.82759	0.91442	0.93333	0.98303	0	0
50-50	en	reddy	glove.run1	default	500	lemma	4	0.74745	0.69875	0.4965	0.84783	0.91764	0.96667	0.98373	0	0	xreddy89	0.74687	0.70084	0.4977	0.84783	0.9185	0.96667	0.98392	0	0
50-50	en	reddy	glove.run1	default	500	lemma	8	0.76084	0.71269	0.505	0.83146	0.92113	0.93333	0.98448	0	0	xreddy89	0.76012	0.7155	0.50742	0.83146	0.92198	0.93333	0.98466	0	0
50-50	en	reddy	glove.run1	default	500	lemmapos	1	0.67642	0.63799	0.44647	0.80899	0.89753	0.9	0.97937	3	0	xreddy89	0.68691	0.65071	0.45678	0.81818	0.90446	0.9	0.98089	3	0
50-50	en	reddy	glove.run1	default	500	lemmapos	4	0.76466	0.71994	0.51601	0.83146	0.9173	0.93333	0.98365	3	0	xreddy89	0.76823	0.72635	0.52225	0.84091	0.92005	0.93333	0.98423	3	0
50-50	en	reddy	glove.run1	default	500	lemmapos	8	0.7795	0.74277	0.53952	0.84091	0.92051	0.93333	0.98434	3	0	xreddy89	0.7804	0.74732	0.54476	0.84091	0.92206	0.93333	0.98467	3	0
50-50	en	reddy	glove.run1	default	500	surface	1	0.70896	0.64778	0.45698	0.82474	0.90787	0.9	0.98162	0	1	xreddy89	0.71267	0.65757	0.46445	0.83333	0.91253	0.9	0.98261	0	0
50-50	en	reddy	glove.run1	default	500	surface	4	0.7618	0.70923	0.5075	0.84783	0.92342	0.9	0.98497	0	1	xreddy89	0.76578	0.71748	0.51458	0.85714	0.92741	0.9	0.98579	0	0
50-50	en	reddy	glove.run1	default	500	surface	8	0.75614	0.69668	0.4985	0.83871	0.92018	0.9	0.98425	0	1	xreddy89	0.76008	0.70516	0.50588	0.84783	0.92416	0.9	0.98507	0	0
50-50	en	reddy	glove.run1	default	500	surface@stoppy	1	0.67071	0.58972	0.40195	0.8	0.89058	0.86667	0.9778	0	1	xreddy89	0.67422	0.59965	0.40972	0.80952	0.89483	0.86667	0.97873	0	0
50-50	en	reddy	glove.run1	default	500	surface@stoppy	4	0.73043	0.66823	0.46899	0.83544	0.92082	0.9	0.98435	0	1	xreddy89	0.73425	0.6763	0.4757	0.84211	0.92417	0.9	0.98504	0	0
50-50	en	reddy	glove.run1	default	500	surface@stoppy	8	0.73601	0.6782	0.47549	0.82979	0.91722	0.9	0.98364	0	1	xreddy89	0.73986	0.68601	0.48133	0.83871	0.92052	0.9	0.98433	0	0
50-50	en	reddy	glove.run2	default	250	lemma	1	0.68993	0.64219	0.44197	0.82927	0.90846	0.9	0.98175	0	0	xreddy89	0.69911	0.65516	0.45269	0.83951	0.91592	0.93333	0.98336	0	0
50-50	en	reddy	glove.run2	default	250	lemma	4	0.7605	0.71239	0.50901	0.82353	0.91838	0.96667	0.98394	0	0	xreddy89	0.76036	0.71597	0.51151	0.82353	0.91993	0.96667	0.98427	0	0
50-50	en	reddy	glove.run2	default	250	lemma	8	0.77089	0.72701	0.52051	0.84783	0.93011	0.93333	0.98635	0	0	xreddy89	0.77007	0.72807	0.52021	0.84783	0.93043	0.93333	0.98642	0	0
50-50	en	reddy	glove.run2	default	250	lemmapos	1	0.69225	0.646	0.45398	0.8125	0.90069	0.86667	0.98004	3	0	xreddy89	0.70475	0.65931	0.46496	0.82105	0.90858	0.9	0.98177	3	0
50-50	en	reddy	glove.run2	default	250	lemmapos	4	0.77382	0.73127	0.52852	0.83951	0.92361	0.93333	0.985	3	0	xreddy89	0.778	0.74072	0.53709	0.85	0.92819	0.93333	0.98595	3	0
50-50	en	reddy	glove.run2	default	250	lemmapos	8	0.78895	0.75999	0.55903	0.84444	0.92684	0.93333	0.98568	3	0	xreddy89	0.78959	0.76376	0.56317	0.84444	0.9282	0.93333	0.98596	3	0
50-50	en	reddy	glove.run2	default	250	surface	1	0.71554	0.63881	0.44948	0.81633	0.91158	0.93333	0.98245	0	1	xreddy89	0.71927	0.64832	0.45678	0.82474	0.91558	0.93333	0.9833	0	0
50-50	en	reddy	glove.run2	default	250	surface	4	0.7551	0.69691	0.49	0.84211	0.92195	0.93333	0.98467	0	1	xreddy89	0.75904	0.70517	0.49668	0.85106	0.9259	0.93333	0.98549	0	0
50-50	en	reddy	glove.run2	default	250	surface	8	0.04396	0.10813	0.07829	0.65152	0.51123	0.53333	0.77573	0	1	xreddy89	0.04419	0.10666	0.07775	0.65649	0.51417	0.53333	0.77652	0	0
50-50	en	reddy	glove.run2	default	250	surface@stoppy	1	0.67225	0.60655	0.41946	0.80488	0.89063	0.86667	0.97774	0	1	xreddy89	0.67576	0.61714	0.42813	0.81481	0.89548	0.86667	0.97879	0	0
50-50	en	reddy	glove.run2	default	250	surface@stoppy	4	0.73598	0.66117	0.45748	0.84091	0.92375	0.96667	0.98501	0	1	xreddy89	0.73982	0.66995	0.46445	0.85057	0.92774	0.96667	0.98583	0	0
50-50	en	reddy	glove.run2	default	250	surface@stoppy	8	0.67183	0.6568	0.45498	0.83871	0.92316	0.96667	0.9849	0	1	xreddy89	0.67534	0.66401	0.46138	0.84783	0.9259	0.96667	0.98548	0	0
50-50	en	reddy	glove.run2	default	750	lemma	1	0.68432	0.63659	0.43397	0.81481	0.90573	0.9	0.98116	0	0	xreddy89	0.69329	0.64905	0.44399	0.825	0.91234	0.93333	0.98258	0	0
50-50	en	reddy	glove.run2	default	750	lemma	4	0.73841	0.68199	0.47849	0.83516	0.91247	0.96667	0.98262	0	0	xreddy89	0.73831	0.68407	0.4798	0.83516	0.91327	0.96667	0.98279	0	0
50-50	en	reddy	glove.run2	default	750	lemma	8	0.75134	0.70062	0.4955	0.82979	0.91561	0.93333	0.9833	0	0	xreddy89	0.75086	0.70307	0.49719	0.82979	0.9164	0.93333	0.98347	0	0
50-50	en	reddy	glove.run2	default	750	lemmapos	1	0.68173	0.64766	0.45798	0.79592	0.89786	0.9	0.97947	3	0	xreddy89	0.69291	0.66053	0.46854	0.80412	0.9048	0.93333	0.98099	3	0
50-50	en	reddy	glove.run2	default	750	lemmapos	4	0.7536	0.7088	0.5055	0.82927	0.91579	0.93333	0.98333	3	0	xreddy89	0.75711	0.71527	0.51151	0.83721	0.9185	0.93333	0.98391	3	0
50-50	en	reddy	glove.run2	default	750	lemmapos	8	0.77113	0.73249	0.53002	0.83516	0.91298	0.93333	0.98273	3	0	xreddy89	0.77175	0.73689	0.53504	0.84444	0.91442	0.93333	0.98304	3	0
50-50	en	reddy	glove.run2	default	750	surface	1	0.70525	0.64111	0.44948	0.81319	0.90577	0.9	0.98119	0	1	xreddy89	0.70893	0.65022	0.45627	0.82222	0.90983	0.9	0.98205	0	0
50-50	en	reddy	glove.run2	default	750	surface	4	0.74928	0.69448	0.497	0.84783	0.91881	0.9	0.98394	0	1	xreddy89	0.75319	0.70269	0.50435	0.85714	0.9227	0.9	0.98475	0	0
50-50	en	reddy	glove.run2	default	750	surface	8	0.75273	0.69354	0.495	0.84091	0.91916	0.9	0.98399	0	1	xreddy89	0.75666	0.7011	0.50179	0.85057	0.92256	0.9	0.98469	0	0
50-50	en	reddy	glove.run2	default	750	surface@stoppy	1	0.68929	0.61914	0.42796	0.80488	0.89234	0.86667	0.97818	0	1	xreddy89	0.69289	0.62876	0.43632	0.81481	0.89656	0.86667	0.9791	0	0
50-50	en	reddy	glove.run2	default	750	surface@stoppy	4	0.71901	0.64439	0.44597	0.84444	0.91117	0.9	0.98227	0	1	xreddy89	0.72276	0.65231	0.45217	0.85393	0.91448	0.9	0.98296	0	0
50-50	en	reddy	glove.run2	default	750	surface@stoppy	8	0.67009	0.64442	0.44497	0.80851	0.90719	0.93333	0.98152	0	1	xreddy89	0.67359	0.65157	0.45115	0.8172	0.91009	0.93333	0.98215	0	0
50-50	en	reddy	glove.run2	default	500	lemma	1	0.68697	0.63774	0.43697	0.82353	0.9038	0.9	0.98073	0	0	xreddy89	0.6953	0.6508	0.44757	0.83333	0.91107	0.9	0.98231	0	0
50-50	en	reddy	glove.run2	default	500	lemma	4	0.75109	0.69709	0.4925	0.83871	0.9212	0.96667	0.98452	0	0	xreddy89	0.75068	0.6993	0.49361	0.83871	0.92202	0.96667	0.9847	0	0
50-50	en	reddy	glove.run2	default	500	lemma	8	0.76004	0.70958	0.5045	0.83146	0.91767	0.93333	0.98375	0	0	xreddy89	0.75918	0.71163	0.50588	0.83146	0.91849	0.93333	0.98393	0	0
50-50	en	reddy	glove.run2	default	500	lemmapos	1	0.68333	0.64931	0.45228	0.80899	0.89867	0.9	0.97961	3	0	xreddy89	0.69362	0.66223	0.46272	0.81818	0.90568	0.93333	0.98115	3	0
50-50	en	reddy	glove.run2	default	500	lemmapos	4	0.76428	0.71774	0.51432	0.83951	0.91897	0.93333	0.984	3	0	xreddy89	0.7676	0.72437	0.52104	0.83951	0.92171	0.93333	0.98458	3	0
50-50	en	reddy	glove.run2	default	500	lemmapos	8	0.77593	0.74204	0.54102	0.82222	0.91576	0.93333	0.98335	3	0	xreddy89	0.7771	0.74749	0.5468	0.83146	0.91806	0.93333	0.98384	3	0
50-50	en	reddy	glove.run2	default	500	surface	1	0.70755	0.62944	0.44097	0.82	0.90642	0.9	0.98133	0	1	xreddy89	0.71124	0.63875	0.44808	0.82828	0.91039	0.9	0.98218	0	0
50-50	en	reddy	glove.run2	default	500	surface	4	0.75988	0.70641	0.507	0.84783	0.92313	0.93333	0.98489	0	1	xreddy89	0.76385	0.71449	0.51356	0.85714	0.92712	0.93333	0.98571	0	0
50-50	en	reddy	glove.run2	default	500	surface	8	0.75911	0.7023	0.503	0.84091	0.92017	0.9	0.98425	0	1	xreddy89	0.76307	0.71159	0.511	0.85057	0.92473	0.9	0.98519	0	0
50-50	en	reddy	glove.run2	default	500	surface@stoppy	1	0.67497	0.60136	0.41346	0.8	0.89196	0.86667	0.97808	0	1	xreddy89	0.6785	0.61189	0.422	0.80952	0.8968	0.86667	0.97913	0	0
50-50	en	reddy	glove.run2	default	500	surface@stoppy	4	0.71941	0.64693	0.44697	0.83871	0.91403	0.9	0.98291	0	1	xreddy89	0.72316	0.65546	0.45371	0.84783	0.9178	0.9	0.9837	0	0
50-50	en	reddy	glove.run2	default	500	surface@stoppy	8	0.67232	0.65579	0.45698	0.81579	0.91442	0.93333	0.98308	0	1	xreddy89	0.67583	0.66338	0.46394	0.8172	0.91738	0.93333	0.98371	0	0
50-50	en	reddy	glove.run3	default	250	lemma	1	0.69739	0.65615	0.45498	0.82353	0.91197	0.9	0.98251	0	0	xreddy89	0.70735	0.66954	0.46599	0.83333	0.91958	0.93333	0.98414	0	0
50-50	en	reddy	glove.run3	default	250	lemma	4	0.76363	0.71187	0.505	0.83516	0.92325	0.96667	0.98494	0	0	xreddy89	0.76398	0.71566	0.50844	0.83871	0.92457	0.96667	0.98521	0	0
50-50	en	reddy	glove.run3	default	250	lemma	8	0.77374	0.73089	0.52151	0.84783	0.93325	0.96667	0.98703	0	0	xreddy89	0.77314	0.73324	0.52276	0.84783	0.9339	0.96667	0.98717	0	0
50-50	en	reddy	glove.run3	default	250	lemmapos	1	0.68742	0.65017	0.45698	0.8	0.89803	0.9	0.9795	3	0	xreddy89	0.69986	0.6628	0.46752	0.80851	0.90492	0.9	0.98101	3	0
50-50	en	reddy	glove.run3	default	250	lemmapos	4	0.77199	0.72772	0.52401	0.83333	0.92552	0.93333	0.98542	3	0	xreddy89	0.77632	0.73723	0.53248	0.84211	0.93017	0.93333	0.98638	3	0
50-50	en	reddy	glove.run3	default	250	lemmapos	8	0.78311	0.75296	0.55153	0.83146	0.92278	0.93333	0.98485	3	0	xreddy89	0.7843	0.75702	0.55601	0.83516	0.92445	0.93333	0.9852	3	0
50-50	en	reddy	glove.run3	default	250	surface	1	0.71357	0.63091	0.44197	0.81633	0.91001	0.9	0.9821	0	1	xreddy89	0.7173	0.64033	0.44911	0.82474	0.91405	0.9	0.98297	0	0
50-50	en	reddy	glove.run3	default	250	surface	4	0.75559	0.69962	0.501	0.84783	0.91547	0.9	0.98325	0	1	xreddy89	0.75954	0.70832	0.50895	0.85714	0.91933	0.9	0.98405	0	0
50-50	en	reddy	glove.run3	default	250	surface	8	0.76674	0.70844	0.505	0.84706	0.92249	0.93333	0.98475	0	1	xreddy89	0.77074	0.71897	0.51356	0.85714	0.92822	0.93333	0.98595	0	0
50-50	en	reddy	glove.run3	default	250	surface@stoppy	1	0.67589	0.60022	0.41196	0.78049	0.88546	0.86667	0.97668	0	1	xreddy89	0.67942	0.61042	0.42046	0.79012	0.88992	0.86667	0.97767	0	0
50-50	en	reddy	glove.run3	default	250	surface@stoppy	4	0.73	0.65768	0.45748	0.83333	0.91595	0.93333	0.98335	0	1	xreddy89	0.73382	0.66555	0.46394	0.84211	0.91923	0.93333	0.98403	0	0
50-50	en	reddy	glove.run3	default	250	surface@stoppy	8	0.75473	0.68749	0.4895	0.83333	0.92102	0.93333	0.98445	0	1	xreddy89	0.75867	0.69643	0.49719	0.84337	0.92497	0.93333	0.98527	0	0
50-50	en	reddy	glove.run3	default	750	lemma	1	0.68918	0.63556	0.43597	0.81481	0.9061	0.9	0.98122	0	0	xreddy89	0.69792	0.64873	0.44655	0.825	0.91354	0.93333	0.98282	0	0
50-50	en	reddy	glove.run3	default	750	lemma	4	0.73942	0.67987	0.47749	0.84783	0.91281	0.96667	0.98268	0	0	xreddy89	0.73896	0.68268	0.4798	0.84783	0.91359	0.96667	0.98285	0	0
50-50	en	reddy	glove.run3	default	750	lemma	8	0.75144	0.69779	0.489	0.81818	0.91509	0.93333	0.98321	0	0	xreddy89	0.75047	0.70016	0.49054	0.81818	0.91591	0.93333	0.98339	0	0
50-50	en	reddy	glove.run3	default	750	lemmapos	1	0.67785	0.63879	0.44847	0.8	0.89539	0.9	0.97889	3	0	xreddy89	0.68795	0.65177	0.45934	0.80851	0.90229	0.9	0.98041	3	0
50-50	en	reddy	glove.run3	default	750	lemmapos	4	0.75376	0.70951	0.51001	0.83721	0.91398	0.93333	0.98291	3	0	xreddy89	0.75663	0.7158	0.51611	0.84706	0.91674	0.93333	0.98349	3	0
50-50	en	reddy	glove.run3	default	750	lemmapos	8	0.76767	0.7288	0.52451	0.83146	0.91388	0.93333	0.98292	3	0	xreddy89	0.76821	0.733	0.5289	0.83146	0.91533	0.93333	0.98323	3	0
50-50	en	reddy	glove.run3	default	750	surface	1	0.70362	0.63708	0.44347	0.80851	0.90178	0.93333	0.98029	0	1	xreddy89	0.70729	0.64712	0.45115	0.8172	0.90676	0.93333	0.98136	0	0
50-50	en	reddy	glove.run3	default	750	surface	4	0.76009	0.70201	0.5005	0.84783	0.92028	0.9	0.98429	0	1	xreddy89	0.76406	0.70985	0.50742	0.85714	0.92369	0.9	0.98499	0	0
50-50	en	reddy	glove.run3	default	750	surface	8	0.75613	0.69655	0.4965	0.84783	0.92077	0.9	0.98435	0	1	xreddy89	0.76008	0.70421	0.50333	0.85714	0.92417	0.9	0.98505	0	0
50-50	en	reddy	glove.run3	default	750	surface@stoppy	1	0.67714	0.59348	0.40595	0.80488	0.88866	0.86667	0.97734	0	1	xreddy89	0.68067	0.60286	0.41381	0.81481	0.89287	0.86667	0.97826	0	0
50-50	en	reddy	glove.run3	default	750	surface@stoppy	4	0.72639	0.66654	0.46798	0.84444	0.91649	0.9	0.98341	0	1	xreddy89	0.73018	0.67476	0.47519	0.85393	0.91987	0.9	0.98411	0	0
50-50	en	reddy	glove.run3	default	750	surface@stoppy	8	0.73901	0.68665	0.489	0.82979	0.91706	0.9	0.98359	0	1	xreddy89	0.74287	0.69368	0.49463	0.83871	0.91986	0.9	0.98418	0	0
50-50	en	reddy	glove.run3	default	500	lemma	1	0.68528	0.63712	0.44447	0.8046	0.8974	0.9	0.97935	0	0	xreddy89	0.69454	0.64997	0.45524	0.81395	0.90444	0.93333	0.98089	0	0
50-50	en	reddy	glove.run3	default	500	lemma	4	0.74969	0.69986	0.5005	0.83871	0.91804	0.96667	0.98383	0	0	xreddy89	0.7486	0.70233	0.5023	0.83871	0.91891	0.96667	0.98402	0	0
50-50	en	reddy	glove.run3	default	500	lemma	8	0.7644	0.71841	0.51201	0.83146	0.92305	0.93333	0.9849	0	0	xreddy89	0.76333	0.72035	0.51304	0.83146	0.92363	0.93333	0.98503	0	0
50-50	en	reddy	glove.run3	default	500	lemmapos	1	0.6892	0.64466	0.45228	0.83146	0.90285	0.9	0.9805	3	0	xreddy89	0.70092	0.65754	0.46272	0.84091	0.90996	0.93333	0.98204	3	0
50-50	en	reddy	glove.run3	default	500	lemmapos	4	0.76581	0.71481	0.51051	0.82759	0.91602	0.93333	0.98338	3	0	xreddy89	0.76949	0.72118	0.51662	0.83721	0.91874	0.93333	0.98395	3	0
50-50	en	reddy	glove.run3	default	500	lemmapos	8	0.7814	0.74413	0.54102	0.84091	0.9206	0.93333	0.98436	3	0	xreddy89	0.7822	0.74869	0.54629	0.84091	0.92212	0.93333	0.98468	3	0
50-50	en	reddy	glove.run3	default	500	surface	1	0.7116	0.63413	0.44247	0.81188	0.90503	0.9	0.98102	0	1	xreddy89	0.71531	0.64341	0.44962	0.82	0.90899	0.9	0.98187	0	0
50-50	en	reddy	glove.run3	default	500	surface	4	0.75798	0.69493	0.498	0.84783	0.91732	0.93333	0.98367	0	1	xreddy89	0.76194	0.70218	0.50384	0.85714	0.92058	0.93333	0.98436	0	0
50-50	en	reddy	glove.run3	default	500	surface	8	0.76135	0.70412	0.505	0.83871	0.92015	0.9	0.98422	0	1	xreddy89	0.76533	0.71248	0.51253	0.84783	0.92418	0.9	0.98505	0	0
50-50	en	reddy	glove.run3	default	500	surface@stoppy	1	0.67097	0.59569	0.40295	0.79518	0.89478	0.86667	0.97875	0	1	xreddy89	0.67447	0.60493	0.41023	0.80488	0.89852	0.86667	0.97956	0	0
50-50	en	reddy	glove.run3	default	500	surface@stoppy	4	0.73973	0.67087	0.47299	0.83871	0.91911	0.9	0.98402	0	1	xreddy89	0.74359	0.67914	0.48031	0.84783	0.92244	0.9	0.98471	0	0
50-50	en	reddy	glove.run3	default	500	surface@stoppy	8	0.73957	0.68646	0.48599	0.82927	0.91807	0.9	0.98382	0	1	xreddy89	0.74343	0.6936	0.49156	0.83146	0.92086	0.9	0.98441	0	0

## Sheet: en-ours90
weight	language	dataset	model	submodel	dimensions	lemmatype	window	pearson	spearman	kendall	bf1	avgprec	prec@	ndcg	misssingle	misscompound	dataset	pearson	spearman	kendall	bf1	avgprec	prec@	ndcg	misssingle	misscompound
50-50	en	ours90	word2vec.avg	cbow	250	lemma	1	0.62546	0.63267	0.43728	0.83164	0.85119	0.86667	0.960063	0	0	xours86	0.618753	0.62787	0.433763	0.83523	0.852587	0.86667	0.960223	0	0
50-50	en	ours90	word2vec.avg	cbow	250	lemma	4	0.62962	0.64194	0.44744	0.824353	0.83698	0.87778	0.9451	0	0	xours86	0.62737	0.63937	0.44344	0.832637	0.84083	0.87778	0.9457	0	0
50-50	en	ours90	word2vec.avg	cbow	250	lemma	8	0.626967	0.646973	0.45144	0.80971	0.835527	0.9	0.944417	0	0	xours86	0.625143	0.645237	0.448737	0.81586	0.840073	0.9	0.94515	0	0
50-50	en	ours90	word2vec.avg	cbow	250	lemmapos	1	0.618217	0.623297	0.428783	0.80206	0.857257	0.88889	0.968157	0	0	xours86	0.621987	0.627333	0.432117	0.812053	0.8612	0.87778	0.96893	0	0
50-50	en	ours90	word2vec.avg	cbow	250	lemmapos	4	0.631337	0.652337	0.452107	0.824353	0.864413	0.88889	0.968797	0	0	xours86	0.63202	0.651523	0.44965	0.829613	0.867023	0.88889	0.969333	0	0
50-50	en	ours90	word2vec.avg	cbow	250	lemmapos	8	0.615993	0.63194	0.43805	0.81921	0.85342	0.855557	0.965437	0	0	xours86	0.618257	0.634427	0.43917	0.82888	0.858817	0.855557	0.96657	0	0
50-50	en	ours90	word2vec.avg	cbow	250	surface	1	0.617313	0.636123	0.43978	0.827663	0.815577	0.844443	0.938567	0	0	xours86	0.60468	0.6237	0.42938	0.82985	0.81489	0.844443	0.938193	0	0
50-50	en	ours90	word2vec.avg	cbow	250	surface	4	0.606897	0.618487	0.418117	0.808683	0.82241	0.87778	0.944073	0	0	xours86	0.59122	0.608143	0.410207	0.804447	0.82018	0.86667	0.943367	0	0
50-50	en	ours90	word2vec.avg	cbow	250	surface	8	0.592617	0.59881	0.401617	0.80148	0.8149	0.86667	0.939487	0	0	xours86	0.57945	0.58737	0.391217	0.796917	0.813917	0.86667	0.939043	0	0
50-50	en	ours90	word2vec.avg	cbow	250	surface@stoppy	1	0.597643	0.609983	0.41605	0.806597	0.81516	0.81111	0.930947	0	0	xours86	0.585993	0.600037	0.409953	0.80787	0.811947	0.81111	0.92956	0	0
50-50	en	ours90	word2vec.avg	cbow	250	surface@stoppy	4	0.606987	0.62388	0.429283	0.806837	0.821593	0.855557	0.937707	0	0	xours86	0.592513	0.612417	0.41934	0.802747	0.818787	0.844443	0.9368	0	0
50-50	en	ours90	word2vec.avg	cbow	250	surface@stoppy	8	0.6067	0.61826	0.419283	0.801087	0.824847	0.844443	0.94715	0	0	xours86	0.592813	0.605823	0.409477	0.797237	0.822357	0.844443	0.946417	0	0
50-50	en	ours90	word2vec.avg	cbow	750	lemma	1	0.629183	0.63097	0.433613	0.818147	0.856957	0.87778	0.965313	0	0	xours86	0.624933	0.632757	0.436687	0.82307	0.86051	0.86667	0.965913	0	0
50-50	en	ours90	word2vec.avg	cbow	750	lemma	4	0.648303	0.66255	0.467607	0.823023	0.85369	0.9	0.959857	0	0	xours86	0.643703	0.657983	0.462797	0.828267	0.857127	0.9	0.96049	0	0
50-50	en	ours90	word2vec.avg	cbow	750	lemma	8	0.64468	0.66064	0.466273	0.817783	0.85187	0.9	0.96014	0	0	xours86	0.64284	0.659343	0.464073	0.827657	0.858097	0.9	0.961373	0	0
50-50	en	ours90	word2vec.avg	cbow	750	lemmapos	1	0.61257	0.61275	0.426113	0.83523	0.85068	0.86667	0.964767	0	0	xours86	0.617767	0.61979	0.433577	0.84098	0.856743	0.86667	0.96599	0	0
50-50	en	ours90	word2vec.avg	cbow	750	lemmapos	4	0.63088	0.636317	0.443943	0.81359	0.858313	0.87778	0.966917	0	0	xours86	0.628563	0.635173	0.440883	0.815207	0.86121	0.87778	0.96752	0	0
50-50	en	ours90	word2vec.avg	cbow	750	lemmapos	8	0.625607	0.635987	0.449107	0.81898	0.85207	0.86667	0.964583	0	0	xours86	0.62738	0.63855	0.450013	0.83203	0.85757	0.86667	0.96573	0	0
50-50	en	ours90	word2vec.avg	cbow	750	surface	1	0.617063	0.63391	0.439113	0.81974	0.827773	0.855557	0.947573	0	0	xours86	0.604387	0.6241	0.431753	0.82448	0.827543	0.855557	0.94728	0	0
50-50	en	ours90	word2vec.avg	cbow	750	surface	4	0.599223	0.6207	0.423783	0.808393	0.8257	0.87778	0.946897	0	0	xours86	0.583843	0.607983	0.41222	0.80421	0.824053	0.855557	0.946367	0	0
50-50	en	ours90	word2vec.avg	cbow	750	surface	8	0.59847	0.620737	0.421383	0.809057	0.819817	0.87778	0.943087	0	0	xours86	0.5863	0.609993	0.412143	0.804667	0.819633	0.87778	0.942857	0	0
50-50	en	ours90	word2vec.avg	cbow	750	surface@stoppy	1	0.61747	0.645093	0.44861	0.823117	0.84497	0.88889	0.95814	0	0	xours86	0.605187	0.636743	0.44399	0.824977	0.843213	0.88889	0.95752	0	0
50-50	en	ours90	word2vec.avg	cbow	750	surface@stoppy	4	0.610373	0.645337	0.445943	0.81726	0.832763	0.86667	0.948517	0	0	xours86	0.595693	0.63393	0.435043	0.81324	0.830963	0.86667	0.94798	0	0
50-50	en	ours90	word2vec.avg	cbow	750	surface@stoppy	8	0.614843	0.64616	0.44188	0.819873	0.836313	0.86667	0.949767	0	0	xours86	0.601937	0.636783	0.432593	0.816407	0.835473	0.86667	0.94944	0	0
50-50	en	ours90	word2vec.avg	cbow	500	lemma	1	0.6359	0.63714	0.436317	0.828177	0.853803	0.9	0.959473	0	0	xours86	0.63047	0.635413	0.434717	0.833447	0.85602	0.88889	0.95982	0	0
50-50	en	ours90	word2vec.avg	cbow	500	lemma	4	0.652267	0.667067	0.46844	0.84211	0.856827	0.9	0.9612	0	0	xours86	0.648077	0.66271	0.463163	0.84783	0.859903	0.9	0.961763	0	0
50-50	en	ours90	word2vec.avg	cbow	500	lemma	8	0.637903	0.653003	0.45794	0.814007	0.84576	0.9	0.95466	0	0	xours86	0.634667	0.650497	0.454763	0.829113	0.850457	0.9	0.955513	0	0
50-50	en	ours90	word2vec.avg	cbow	500	lemmapos	1	0.61693	0.61736	0.425617	0.827	0.85595	0.86667	0.966583	0	0	xours86	0.61823	0.620933	0.42938	0.832267	0.859287	0.86667	0.967187	0	0
50-50	en	ours90	word2vec.avg	cbow	500	lemmapos	4	0.63902	0.653263	0.458607	0.82312	0.86361	0.88889	0.968037	0	0	xours86	0.637443	0.65185	0.455853	0.825243	0.86632	0.88889	0.96859	0	0
50-50	en	ours90	word2vec.avg	cbow	500	lemmapos	8	0.619403	0.62634	0.437283	0.81781	0.853963	0.86667	0.966183	0	0	xours86	0.62234	0.630257	0.43924	0.83647	0.860423	0.86667	0.96754	0	0
50-50	en	ours90	word2vec.avg	cbow	500	surface	1	0.605353	0.6247	0.431113	0.81607	0.819077	0.855557	0.943617	0	0	xours86	0.593627	0.613677	0.422077	0.820707	0.818747	0.83333	0.943297	0	0
50-50	en	ours90	word2vec.avg	cbow	500	surface	4	0.60599	0.627093	0.427783	0.807297	0.824847	0.87778	0.94396	0	0	xours86	0.590153	0.615087	0.416417	0.802997	0.823027	0.86667	0.94335	0	0
50-50	en	ours90	word2vec.avg	cbow	500	surface	8	0.60327	0.626053	0.426783	0.806183	0.81637	0.86667	0.936227	0	0	xours86	0.591217	0.614837	0.417513	0.806327	0.816073	0.86667	0.93589	0	0
50-50	en	ours90	word2vec.avg	cbow	500	surface@stoppy	1	0.614433	0.629913	0.434283	0.81291	0.83807	0.855557	0.958363	0	0	xours86	0.60397	0.621533	0.430293	0.814487	0.83577	0.844443	0.95739	0	0
50-50	en	ours90	word2vec.avg	cbow	500	surface@stoppy	4	0.60954	0.631943	0.434217	0.819417	0.824507	0.86667	0.937873	0	0	xours86	0.59534	0.619523	0.422373	0.815573	0.82188	0.86667	0.937017	0	0
50-50	en	ours90	word2vec.avg	cbow	500	surface@stoppy	8	0.61161	0.632323	0.431117	0.811793	0.822833	0.86667	0.938113	0	0	xours86	0.59748	0.621933	0.42226	0.807753	0.821443	0.86667	0.937547	0	0
50-50	en	ours90	word2vec.avg	skipgram	250	lemma	1	0.609547	0.617187	0.420217	0.823613	0.84678	0.86667	0.959823	0	0	xours86	0.602863	0.61374	0.417987	0.828663	0.84848	0.86667	0.96007	0	0
50-50	en	ours90	word2vec.avg	skipgram	250	lemma	4	0.632523	0.64921	0.453943	0.831687	0.844217	0.87778	0.95408	0	0	xours86	0.629353	0.644977	0.4491	0.83597	0.8472	0.87778	0.954597	0	0
50-50	en	ours90	word2vec.avg	skipgram	250	lemma	8	0.624857	0.640407	0.444777	0.807283	0.834	0.88889	0.94366	0	0	xours86	0.623767	0.639357	0.442163	0.818253	0.838817	0.88889	0.944447	0	0
50-50	en	ours90	word2vec.avg	skipgram	250	lemmapos	1	0.616477	0.61924	0.421283	0.807107	0.86	0.91111	0.96847	0	0	xours86	0.620543	0.623667	0.424633	0.817307	0.864497	0.91111	0.969387	0	0
50-50	en	ours90	word2vec.avg	skipgram	250	lemmapos	4	0.629473	0.651873	0.453273	0.825767	0.864587	0.88889	0.968913	0	0	xours86	0.630393	0.651603	0.451837	0.82794	0.86808	0.88889	0.96964	0	0
50-50	en	ours90	word2vec.avg	skipgram	250	lemmapos	8	0.614723	0.630193	0.438783	0.82183	0.85407	0.855557	0.965957	0	0	xours86	0.618503	0.633047	0.439607	0.82709	0.85996	0.855557	0.967207	0	0
50-50	en	ours90	word2vec.avg	skipgram	250	surface	1	0.616667	0.632483	0.438113	0.815153	0.817177	0.83333	0.940663	0	0	xours86	0.60426	0.61909	0.425363	0.81988	0.816133	0.83333	0.940177	0	0
50-50	en	ours90	word2vec.avg	skipgram	250	surface	4	0.597213	0.61276	0.41395	0.805847	0.815917	0.86667	0.93938	0	0	xours86	0.58015	0.6013	0.404543	0.801563	0.81372	0.86667	0.938643	0	0
50-50	en	ours90	word2vec.avg	skipgram	250	surface	8	0.596473	0.60369	0.403783	0.8093	0.813327	0.86667	0.93583	0	0	xours86	0.58396	0.59225	0.39341	0.80483	0.812383	0.86667	0.93537	0	0
50-50	en	ours90	word2vec.avg	skipgram	250	surface@stoppy	1	0.597693	0.612507	0.418283	0.81424	0.813753	0.83333	0.927303	0	0	xours86	0.585363	0.603043	0.412397	0.818697	0.81117	0.82222	0.92602	0	0
50-50	en	ours90	word2vec.avg	skipgram	250	surface@stoppy	4	0.607897	0.624697	0.429617	0.815043	0.819827	0.855557	0.93726	0	0	xours86	0.59386	0.613497	0.419883	0.811083	0.817133	0.855557	0.93637	0	0
50-50	en	ours90	word2vec.avg	skipgram	250	surface@stoppy	8	0.611427	0.625093	0.42595	0.804963	0.825063	0.855557	0.94414	0	0	xours86	0.596227	0.613617	0.417697	0.802677	0.822527	0.855557	0.94336	0	0
50-50	en	ours90	word2vec.avg	skipgram	750	lemma	1	0.63214	0.639973	0.436447	0.824203	0.863473	0.9	0.966967	0	0	xours86	0.628873	0.642003	0.439423	0.830057	0.866517	0.9	0.967493	0	0
50-50	en	ours90	word2vec.avg	skipgram	750	lemma	4	0.64992	0.66765	0.47344	0.830347	0.853107	0.87778	0.959373	0	0	xours86	0.64463	0.662893	0.46809	0.835843	0.856417	0.87778	0.95998	0	0
50-50	en	ours90	word2vec.avg	skipgram	750	lemma	8	0.639887	0.650627	0.456607	0.811183	0.847503	0.9	0.958227	0	0	xours86	0.637127	0.6484	0.45385	0.815737	0.852193	0.9	0.95913	0	0
50-50	en	ours90	word2vec.avg	skipgram	750	lemmapos	1	0.615327	0.607343	0.416983	0.826043	0.85331	0.86667	0.96594	0	0	xours86	0.621553	0.614823	0.424487	0.840867	0.858987	0.86667	0.967027	0	0
50-50	en	ours90	word2vec.avg	skipgram	750	lemmapos	4	0.63232	0.640063	0.448107	0.817267	0.857223	0.88889	0.966473	0	0	xours86	0.632263	0.641847	0.448007	0.82229	0.862	0.88889	0.967467	0	0
50-50	en	ours90	word2vec.avg	skipgram	750	lemmapos	8	0.62458	0.63111	0.43995	0.820163	0.85479	0.87778	0.96534	0	0	xours86	0.624677	0.633423	0.442163	0.83702	0.859937	0.87778	0.966393	0	0
50-50	en	ours90	word2vec.avg	skipgram	750	surface	1	0.60798	0.625063	0.431283	0.81001	0.82181	0.87778	0.945823	0	0	xours86	0.596657	0.616673	0.42445	0.814153	0.82305	0.86667	0.945883	0	0
50-50	en	ours90	word2vec.avg	skipgram	750	surface	4	0.599517	0.628503	0.433617	0.803783	0.826983	0.86667	0.94912	0	0	xours86	0.585407	0.61621	0.421897	0.803147	0.825647	0.855557	0.948673	0	0
50-50	en	ours90	word2vec.avg	skipgram	750	surface	8	0.600837	0.622507	0.42345	0.797087	0.817837	0.855557	0.939863	0	0	xours86	0.58834	0.611163	0.413493	0.792577	0.817233	0.855557	0.93951	0	0
50-50	en	ours90	word2vec.avg	skipgram	750	surface@stoppy	1	0.623467	0.64812	0.452107	0.8298	0.84994	0.87778	0.96015	0	0	xours86	0.611283	0.63871	0.444353	0.828827	0.84759	0.87778	0.95943	0	0
50-50	en	ours90	word2vec.avg	skipgram	750	surface@stoppy	4	0.617093	0.646417	0.44611	0.824377	0.839767	0.87778	0.952167	0	0	xours86	0.602117	0.636043	0.437417	0.820587	0.837507	0.87778	0.951547	0	0
50-50	en	ours90	word2vec.avg	skipgram	750	surface@stoppy	8	0.610237	0.642813	0.441943	0.822947	0.83429	0.855557	0.949407	0	0	xours86	0.597763	0.633497	0.43431	0.824787	0.833287	0.855557	0.949	0	0
50-50	en	ours90	word2vec.avg	skipgram	500	lemma	1	0.62722	0.625377	0.430117	0.81547	0.849233	0.9	0.959017	0	0	xours86	0.621127	0.62301	0.42792	0.82029	0.850507	0.9	0.959123	0	0
50-50	en	ours90	word2vec.avg	skipgram	500	lemma	4	0.643777	0.65996	0.464377	0.83806	0.84973	0.9	0.958757	0	0	xours86	0.641037	0.65877	0.462907	0.84367	0.855053	0.9	0.959803	0	0
50-50	en	ours90	word2vec.avg	skipgram	500	lemma	8	0.637117	0.651523	0.45744	0.815557	0.842873	0.9	0.95268	0	0	xours86	0.635117	0.650887	0.456773	0.82891	0.848057	0.9	0.953633	0	0
50-50	en	ours90	word2vec.avg	skipgram	500	lemmapos	1	0.608903	0.605603	0.411617	0.814353	0.8486	0.88889	0.964247	0	0	xours86	0.61011	0.60779	0.414407	0.81646	0.85136	0.88889	0.96478	0	0
50-50	en	ours90	word2vec.avg	skipgram	500	lemmapos	4	0.64251	0.65128	0.458773	0.83153	0.862487	0.87778	0.96767	0	0	xours86	0.64118	0.65103	0.456957	0.83702	0.866067	0.87778	0.96841	0	0
50-50	en	ours90	word2vec.avg	skipgram	500	lemmapos	8	0.623643	0.631063	0.44078	0.82273	0.852153	0.86667	0.96504	0	0	xours86	0.624717	0.633307	0.441067	0.832207	0.857383	0.86667	0.966133	0	0
50-50	en	ours90	word2vec.avg	skipgram	500	surface	1	0.60524	0.620073	0.431617	0.817237	0.80988	0.844443	0.937347	0	0	xours86	0.59355	0.606183	0.419887	0.821877	0.80845	0.82222	0.936737	0	0
50-50	en	ours90	word2vec.avg	skipgram	500	surface	4	0.596047	0.624163	0.42195	0.807073	0.82377	0.86667	0.94117	0	0	xours86	0.581493	0.61224	0.410577	0.80857	0.822663	0.86667	0.940677	0	0
50-50	en	ours90	word2vec.avg	skipgram	500	surface	8	0.603547	0.624007	0.42545	0.800067	0.814687	0.87778	0.936147	0	0	xours86	0.59092	0.613137	0.416053	0.795523	0.814233	0.87778	0.93578	0	0
50-50	en	ours90	word2vec.avg	skipgram	500	surface@stoppy	1	0.614633	0.622557	0.423617	0.803193	0.837837	0.87778	0.95698	0	0	xours86	0.6031	0.61317	0.41861	0.80389	0.834923	0.844443	0.955953	0	0
50-50	en	ours90	word2vec.avg	skipgram	500	surface@stoppy	4	0.612627	0.636943	0.43845	0.822837	0.82781	0.86667	0.93851	0	0	xours86	0.59813	0.62601	0.429017	0.81898	0.825587	0.86667	0.93774	0	0
50-50	en	ours90	word2vec.avg	skipgram	500	surface@stoppy	8	0.61371	0.636987	0.43595	0.811703	0.82885	0.86667	0.94365	0	0	xours86	0.60037	0.627187	0.427917	0.81021	0.828043	0.86667	0.943267	0	0
50-50	en	ours90	word2vec.run1	cbow	250	lemma	1	0.62895	0.63618	0.44244	0.83516	0.85395	0.86667	0.9614	0	0	xours86	0.62149	0.62898	0.43632	0.83516	0.85362	0.86667	0.9612	0	0
50-50	en	ours90	word2vec.run1	cbow	250	lemma	4	0.62749	0.6355	0.44544	0.82105	0.83421	0.86667	0.94179	0	0	xours86	0.62717	0.63586	0.44399	0.83516	0.83995	0.86667	0.94275	0	0
50-50	en	ours90	word2vec.run1	cbow	250	lemma	8	0.62595	0.64697	0.44844	0.80808	0.83752	0.9	0.95023	0	0	xours86	0.62469	0.64506	0.44618	0.8125	0.84154	0.9	0.95092	0	0
50-50	en	ours90	word2vec.run1	cbow	250	lemmapos	1	0.61172	0.62113	0.42695	0.79208	0.85798	0.9	0.96846	0	0	xours86	0.61808	0.62716	0.43248	0.80412	0.86337	0.9	0.96958	0	0
50-50	en	ours90	word2vec.run1	cbow	250	lemmapos	4	0.63445	0.65387	0.45644	0.82979	0.86457	0.86667	0.96917	0	0	xours86	0.6347	0.65303	0.4544	0.83516	0.86733	0.86667	0.96973	0	0
50-50	en	ours90	word2vec.run1	cbow	250	lemmapos	8	0.61276	0.62768	0.43545	0.82222	0.85026	0.83333	0.9649	0	0	xours86	0.61659	0.63103	0.43741	0.82759	0.85699	0.83333	0.96634	0	0
50-50	en	ours90	word2vec.run1	cbow	250	surface	1	0.62086	0.6431	0.44844	0.83333	0.80899	0.83333	0.92896	0	0	xours86	0.60971	0.63185	0.43906	0.83871	0.80911	0.83333	0.92868	0	0
50-50	en	ours90	word2vec.run1	cbow	250	surface	4	0.60096	0.61118	0.40995	0.80851	0.81693	0.86667	0.93686	0	0	xours86	0.58652	0.6006	0.40181	0.80435	0.8148	0.86667	0.9361	0	0
50-50	en	ours90	word2vec.run1	cbow	250	surface	8	0.59468	0.59774	0.39845	0.8	0.81427	0.86667	0.9363	0	0	xours86	0.58088	0.585	0.38647	0.79545	0.81333	0.86667	0.93583	0	0
50-50	en	ours90	word2vec.run1	cbow	250	surface@stoppy	1	0.59984	0.61481	0.41775	0.80435	0.81204	0.83333	0.91006	0	0	xours86	0.58716	0.60486	0.412	0.8	0.80757	0.83333	0.90798	0	0
50-50	en	ours90	word2vec.run1	cbow	250	surface@stoppy	4	0.60534	0.6218	0.42845	0.80808	0.81934	0.83333	0.93723	0	0	xours86	0.58982	0.60949	0.41715	0.80412	0.8162	0.83333	0.93623	0	0
50-50	en	ours90	word2vec.run1	cbow	250	surface@stoppy	8	0.60714	0.62156	0.41895	0.80734	0.82387	0.83333	0.94671	0	0	xours86	0.59237	0.60896	0.40893	0.80374	0.82085	0.83333	0.94587	0	0
50-50	en	ours90	word2vec.run1	cbow	750	lemma	1	0.61643	0.61872	0.42345	0.8172	0.85078	0.86667	0.9643	0	0	xours86	0.6122	0.62036	0.42482	0.82222	0.85473	0.86667	0.96503	0	0
50-50	en	ours90	word2vec.run1	cbow	750	lemma	4	0.64148	0.65004	0.45494	0.81319	0.85137	0.9	0.95931	0	0	xours86	0.6361	0.6446	0.44892	0.81818	0.85368	0.9	0.95971	0	0
50-50	en	ours90	word2vec.run1	cbow	750	lemma	8	0.65009	0.66537	0.46944	0.81188	0.85457	0.9	0.96252	0	0	xours86	0.64825	0.66366	0.46426	0.81818	0.86085	0.9	0.96378	0	0
50-50	en	ours90	word2vec.run1	cbow	750	lemmapos	1	0.59799	0.59651	0.41195	0.82609	0.8449	0.86667	0.96358	0	0	xours86	0.60361	0.60317	0.41769	0.83146	0.8512	0.86667	0.96485	0	0
50-50	en	ours90	word2vec.run1	cbow	750	lemmapos	4	0.62703	0.63322	0.44095	0.8046	0.85696	0.86667	0.96732	0	0	xours86	0.62475	0.63327	0.43906	0.80851	0.86041	0.86667	0.96806	0	0
50-50	en	ours90	word2vec.run1	cbow	750	lemmapos	8	0.62409	0.63392	0.44494	0.8125	0.85148	0.86667	0.96495	0	0	xours86	0.62585	0.63644	0.44618	0.82759	0.85867	0.86667	0.96646	0	0
50-50	en	ours90	word2vec.run1	cbow	750	surface	1	0.62577	0.63793	0.43945	0.82828	0.83602	0.83333	0.95001	0	0	xours86	0.61405	0.62899	0.43303	0.83333	0.83573	0.83333	0.94965	0	0
50-50	en	ours90	word2vec.run1	cbow	750	surface	4	0.59697	0.62075	0.42695	0.80808	0.82331	0.86667	0.94694	0	0	xours86	0.58092	0.60757	0.41496	0.80412	0.82123	0.86667	0.9463	0	0
50-50	en	ours90	word2vec.run1	cbow	750	surface	8	0.60145	0.62262	0.42095	0.80899	0.82268	0.86667	0.94654	0	0	xours86	0.58905	0.61348	0.41386	0.8046	0.82266	0.86667	0.94639	0	0
50-50	en	ours90	word2vec.run1	cbow	750	surface@stoppy	1	0.61975	0.65151	0.45644	0.82	0.84718	0.9	0.9593	0	0	xours86	0.60802	0.64318	0.45056	0.81633	0.84503	0.9	0.95865	0	0
50-50	en	ours90	word2vec.run1	cbow	750	surface@stoppy	4	0.60974	0.64371	0.44644	0.8125	0.83059	0.86667	0.94794	0	0	xours86	0.59417	0.6314	0.43468	0.80851	0.82792	0.86667	0.94719	0	0
50-50	en	ours90	word2vec.run1	cbow	750	surface@stoppy	8	0.60957	0.63665	0.43195	0.8172	0.83194	0.86667	0.94883	0	0	xours86	0.59614	0.62719	0.42262	0.81319	0.83103	0.86667	0.94849	0	0
50-50	en	ours90	word2vec.run1	cbow	500	lemma	1	0.62839	0.63003	0.43225	0.81633	0.84794	0.9	0.95777	0	0	xours86	0.62329	0.62835	0.43063	0.82105	0.85024	0.9	0.95816	0	0
50-50	en	ours90	word2vec.run1	cbow	500	lemma	4	0.65327	0.66934	0.47194	0.84211	0.85757	0.9	0.96061	0	0	xours86	0.64731	0.66428	0.46645	0.84783	0.86002	0.9	0.96103	0	0
50-50	en	ours90	word2vec.run1	cbow	500	lemma	8	0.63602	0.65652	0.46344	0.8125	0.84681	0.9	0.95768	0	0	xours86	0.63264	0.65255	0.45878	0.82979	0.85063	0.9	0.95839	0	0
50-50	en	ours90	word2vec.run1	cbow	500	lemmapos	1	0.61386	0.61363	0.42395	0.8125	0.84888	0.86667	0.96433	0	0	xours86	0.61515	0.61584	0.42591	0.8172	0.85118	0.86667	0.96461	0	0
50-50	en	ours90	word2vec.run1	cbow	500	lemmapos	4	0.6369	0.65121	0.45344	0.82105	0.86114	0.9	0.967	0	0	xours86	0.6343	0.64863	0.45001	0.82609	0.86374	0.9	0.96752	0	0
50-50	en	ours90	word2vec.run1	cbow	500	lemmapos	8	0.61671	0.62754	0.44145	0.82222	0.85449	0.86667	0.96616	0	0	xours86	0.62107	0.63071	0.44289	0.84091	0.86072	0.86667	0.96746	0	0
50-50	en	ours90	word2vec.run1	cbow	500	surface	1	0.59914	0.61928	0.42595	0.82	0.8169	0.86667	0.94261	0	0	xours86	0.58644	0.6075	0.41715	0.82474	0.81592	0.83333	0.94215	0	0
50-50	en	ours90	word2vec.run1	cbow	500	surface	4	0.60476	0.62306	0.42345	0.80435	0.82202	0.86667	0.94568	0	0	xours86	0.58888	0.6107	0.41222	0.8	0.82014	0.86667	0.94508	0	0
50-50	en	ours90	word2vec.run1	cbow	500	surface	8	0.60876	0.62999	0.43295	0.8046	0.81515	0.86667	0.93573	0	0	xours86	0.59545	0.61703	0.42208	0.8	0.81415	0.86667	0.93524	0	0
50-50	en	ours90	word2vec.run1	cbow	500	surface@stoppy	1	0.60379	0.61776	0.42245	0.80392	0.83218	0.83333	0.9562	0	0	xours86	0.59227	0.60859	0.41824	0.80808	0.82928	0.83333	0.95489	0	0
50-50	en	ours90	word2vec.run1	cbow	500	surface@stoppy	4	0.61018	0.64018	0.44275	0.82	0.82673	0.86667	0.93845	0	0	xours86	0.5955	0.62775	0.43063	0.81633	0.82445	0.86667	0.93767	0	0
50-50	en	ours90	word2vec.run1	cbow	500	surface@stoppy	8	0.61232	0.62831	0.42645	0.8172	0.82068	0.86667	0.93723	0	0	xours86	0.59773	0.61675	0.41605	0.81319	0.81889	0.86667	0.93657	0	0
50-50	en	ours90	word2vec.run1	skipgram	250	lemma	1	0.61079	0.61703	0.42495	0.82105	0.84572	0.86667	0.95965	0	0	xours86	0.60382	0.61248	0.42208	0.82609	0.84815	0.86667	0.96007	0	0
50-50	en	ours90	word2vec.run1	skipgram	250	lemma	4	0.61912	0.63534	0.43995	0.82474	0.83913	0.86667	0.95587	0	0	xours86	0.61687	0.63349	0.43741	0.82979	0.84446	0.86667	0.95692	0	0
50-50	en	ours90	word2vec.run1	skipgram	250	lemma	8	0.62315	0.64074	0.44794	0.80899	0.83798	0.9	0.95079	0	0	xours86	0.62134	0.64001	0.44454	0.82759	0.84339	0.9	0.95177	0	0
50-50	en	ours90	word2vec.run1	skipgram	250	lemmapos	1	0.60768	0.61264	0.41695	0.80412	0.85816	0.9	0.96811	0	0	xours86	0.61295	0.6187	0.42098	0.8172	0.86325	0.9	0.96914	0	0
50-50	en	ours90	word2vec.run1	skipgram	250	lemmapos	4	0.62984	0.64824	0.45144	0.83871	0.86463	0.86667	0.96908	0	0	xours86	0.62962	0.64622	0.44782	0.83516	0.86676	0.86667	0.96953	0	0
50-50	en	ours90	word2vec.run1	skipgram	250	lemmapos	8	0.61256	0.62918	0.43845	0.82222	0.85396	0.83333	0.96607	0	0	xours86	0.61735	0.6317	0.43961	0.82759	0.85963	0.83333	0.96727	0	0
50-50	en	ours90	word2vec.run1	skipgram	250	surface	1	0.6196	0.63845	0.44394	0.82105	0.81738	0.83333	0.9349	0	0	xours86	0.60781	0.62472	0.43084	0.82609	0.81635	0.83333	0.93436	0	0
50-50	en	ours90	word2vec.run1	skipgram	250	surface	4	0.59601	0.61021	0.41295	0.81319	0.81198	0.86667	0.93517	0	0	xours86	0.57806	0.59819	0.4029	0.80899	0.80912	0.86667	0.93424	0	0
50-50	en	ours90	word2vec.run1	skipgram	250	surface	8	0.59129	0.59251	0.39445	0.8	0.80882	0.86667	0.93468	0	0	xours86	0.5766	0.58118	0.38483	0.79545	0.80769	0.86667	0.93418	0	0
50-50	en	ours90	word2vec.run1	skipgram	250	surface@stoppy	1	0.59533	0.60995	0.41695	0.80392	0.81742	0.83333	0.93778	0	0	xours86	0.5837	0.60095	0.41167	0.80808	0.8141	0.83333	0.9363	0	0
50-50	en	ours90	word2vec.run1	skipgram	250	surface@stoppy	4	0.5957	0.61504	0.41745	0.80435	0.81786	0.86667	0.93671	0	0	xours86	0.58075	0.60396	0.40893	0.8	0.81537	0.86667	0.93587	0	0
50-50	en	ours90	word2vec.run1	skipgram	250	surface@stoppy	8	0.61442	0.62535	0.42345	0.81553	0.83021	0.86667	0.94813	0	0	xours86	0.59944	0.61363	0.41441	0.81188	0.82745	0.86667	0.94736	0	0
50-50	en	ours90	word2vec.run1	skipgram	750	lemma	1	0.64431	0.65435	0.45344	0.83333	0.86715	0.9	0.96855	0	0	xours86	0.64265	0.6573	0.45659	0.83871	0.87121	0.9	0.96933	0	0
50-50	en	ours90	word2vec.run1	skipgram	750	lemma	4	0.6456	0.66089	0.47094	0.82609	0.85073	0.86667	0.95915	0	0	xours86	0.63867	0.65412	0.46371	0.83146	0.8524	0.86667	0.95941	0	0
50-50	en	ours90	word2vec.run1	skipgram	750	lemma	8	0.64247	0.64792	0.45394	0.82105	0.85132	0.9	0.95946	0	0	xours86	0.64072	0.64625	0.45166	0.82609	0.85706	0.9	0.96059	0	0
50-50	en	ours90	word2vec.run1	skipgram	750	lemmapos	1	0.61889	0.6096	0.41825	0.83871	0.86214	0.86667	0.9689	0	0	xours86	0.62436	0.61534	0.42405	0.85393	0.86663	0.86667	0.96969	0	0
50-50	en	ours90	word2vec.run1	skipgram	750	lemmapos	4	0.63307	0.64078	0.44844	0.80851	0.85545	0.9	0.96573	0	0	xours86	0.63199	0.64245	0.44837	0.81319	0.86002	0.9	0.96667	0	0
50-50	en	ours90	word2vec.run1	skipgram	750	lemmapos	8	0.62077	0.62706	0.43945	0.82609	0.84895	0.86667	0.96275	0	0	xours86	0.62131	0.62927	0.44125	0.84444	0.85334	0.86667	0.96364	0	0
50-50	en	ours90	word2vec.run1	skipgram	750	surface	1	0.60883	0.62368	0.43195	0.81081	0.82269	0.9	0.94648	0	0	xours86	0.59676	0.61281	0.42208	0.81481	0.82309	0.86667	0.94635	0	0
50-50	en	ours90	word2vec.run1	skipgram	750	surface	4	0.59908	0.62547	0.43445	0.78723	0.82711	0.86667	0.95205	0	0	xours86	0.58525	0.61317	0.42208	0.78899	0.82645	0.83333	0.95179	0	0
50-50	en	ours90	word2vec.run1	skipgram	750	surface	8	0.60386	0.62001	0.42295	0.79121	0.82243	0.83333	0.94702	0	0	xours86	0.59128	0.60984	0.41496	0.78652	0.8225	0.83333	0.94689	0	0
50-50	en	ours90	word2vec.run1	skipgram	750	surface@stoppy	1	0.62864	0.65688	0.45994	0.83871	0.85482	0.9	0.96126	0	0	xours86	0.61589	0.64659	0.45056	0.84314	0.85243	0.9	0.96057	0	0
50-50	en	ours90	word2vec.run1	skipgram	750	surface@stoppy	4	0.60934	0.63841	0.43845	0.82609	0.83036	0.86667	0.94747	0	0	xours86	0.59416	0.62771	0.4292	0.82222	0.82795	0.86667	0.94678	0	0
50-50	en	ours90	word2vec.run1	skipgram	750	surface@stoppy	8	0.60865	0.64645	0.44394	0.82979	0.83398	0.83333	0.94928	0	0	xours86	0.59749	0.63607	0.43358	0.82609	0.83374	0.83333	0.94909	0	0
50-50	en	ours90	word2vec.run1	skipgram	500	lemma	1	0.62058	0.61965	0.42095	0.8125	0.84815	0.9	0.95858	0	0	xours86	0.61332	0.61637	0.41824	0.8172	0.8491	0.9	0.95864	0	0
50-50	en	ours90	word2vec.run1	skipgram	500	lemma	4	0.64551	0.66521	0.46975	0.85106	0.85237	0.9	0.95932	0	0	xours86	0.6418	0.6638	0.46788	0.85714	0.85807	0.9	0.96045	0	0
50-50	en	ours90	word2vec.run1	skipgram	500	lemma	8	0.63725	0.65067	0.45544	0.8125	0.84199	0.9	0.95239	0	0	xours86	0.63596	0.64972	0.4544	0.82979	0.84749	0.9	0.9534	0	0
50-50	en	ours90	word2vec.run1	skipgram	500	lemmapos	1	0.61099	0.61581	0.42095	0.83516	0.85421	0.9	0.96471	0	0	xours86	0.61311	0.6174	0.42372	0.83146	0.85638	0.9	0.96517	0	0
50-50	en	ours90	word2vec.run1	skipgram	500	lemmapos	4	0.64074	0.65397	0.45744	0.83871	0.86155	0.9	0.96717	0	0	xours86	0.63936	0.65404	0.45714	0.84444	0.8654	0.9	0.96796	0	0
50-50	en	ours90	word2vec.run1	skipgram	500	lemmapos	8	0.61797	0.6191	0.43195	0.82105	0.84906	0.86667	0.96491	0	0	xours86	0.61762	0.61931	0.43029	0.82609	0.8537	0.86667	0.9659	0	0
50-50	en	ours90	word2vec.run1	skipgram	500	surface	1	0.60399	0.61972	0.42945	0.81633	0.80999	0.83333	0.93956	0	0	xours86	0.59263	0.60567	0.41715	0.82105	0.80853	0.83333	0.93898	0	0
50-50	en	ours90	word2vec.run1	skipgram	500	surface	4	0.59288	0.61571	0.41395	0.80412	0.82067	0.86667	0.93778	0	0	xours86	0.57722	0.60284	0.40181	0.8	0.8188	0.86667	0.93709	0	0
50-50	en	ours90	word2vec.run1	skipgram	500	surface	8	0.59933	0.6166	0.41545	0.79121	0.81289	0.9	0.93594	0	0	xours86	0.5879	0.60716	0.40729	0.78652	0.81391	0.9	0.93589	0	0
50-50	en	ours90	word2vec.run1	skipgram	500	surface@stoppy	1	0.61834	0.62955	0.43145	0.8172	0.85001	0.86667	0.96358	0	0	xours86	0.60733	0.62057	0.42646	0.82	0.84728	0.83333	0.96253	0	0
50-50	en	ours90	word2vec.run1	skipgram	500	surface@stoppy	4	0.61044	0.63036	0.43745	0.81633	0.82039	0.86667	0.93692	0	0	xours86	0.59702	0.61771	0.42646	0.8125	0.81809	0.86667	0.93612	0	0
50-50	en	ours90	word2vec.run1	skipgram	500	surface@stoppy	8	0.61252	0.63769	0.43445	0.80374	0.8288	0.86667	0.9395	0	0	xours86	0.59837	0.62732	0.42536	0.80769	0.82756	0.86667	0.93898	0	0
50-50	en	ours90	word2vec.run2	cbow	250	lemma	1	0.61472	0.62289	0.42845	0.82105	0.84332	0.86667	0.95623	0	0	xours86	0.60828	0.61923	0.42646	0.82609	0.84555	0.86667	0.95655	0	0
50-50	en	ours90	word2vec.run2	cbow	250	lemma	4	0.63773	0.65429	0.45444	0.82979	0.84478	0.9	0.95257	0	0	xours86	0.63467	0.64989	0.44892	0.83516	0.84718	0.9	0.95294	0	0
50-50	en	ours90	word2vec.run2	cbow	250	lemma	8	0.62489	0.64405	0.45094	0.8	0.83464	0.9	0.94174	0	0	xours86	0.62247	0.64257	0.44782	0.80899	0.83985	0.9	0.94258	0	0
50-50	en	ours90	word2vec.run2	cbow	250	lemmapos	1	0.61893	0.62301	0.42545	0.81818	0.85792	0.9	0.96806	0	0	xours86	0.62114	0.62631	0.42755	0.82353	0.86122	0.86667	0.96868	0	0
50-50	en	ours90	word2vec.run2	cbow	250	lemmapos	4	0.62753	0.64752	0.44844	0.82105	0.86063	0.9	0.96744	0	0	xours86	0.62785	0.64557	0.44399	0.82609	0.86291	0.9	0.96792	0	0
50-50	en	ours90	word2vec.run2	cbow	250	lemmapos	8	0.61952	0.63586	0.44045	0.82222	0.85484	0.86667	0.96536	0	0	xours86	0.6196	0.63761	0.43961	0.82759	0.85947	0.86667	0.96632	0	0
50-50	en	ours90	word2vec.run2	cbow	250	surface	1	0.61325	0.62993	0.43495	0.81633	0.81438	0.83333	0.94203	0	0	xours86	0.60047	0.61747	0.42536	0.82105	0.81411	0.83333	0.9418	0	0
50-50	en	ours90	word2vec.run2	cbow	250	surface	4	0.60054	0.61574	0.41645	0.80435	0.82208	0.86667	0.94676	0	0	xours86	0.58366	0.60482	0.40783	0.8	0.8197	0.86667	0.94605	0	0
50-50	en	ours90	word2vec.run2	cbow	250	surface	8	0.59482	0.60061	0.40195	0.80899	0.81303	0.86667	0.93602	0	0	xours86	0.58095	0.5898	0.39195	0.8046	0.81178	0.86667	0.93548	0	0
50-50	en	ours90	word2vec.run2	cbow	250	surface@stoppy	1	0.59772	0.60929	0.41745	0.81132	0.81229	0.8	0.93613	0	0	xours86	0.58541	0.59979	0.41112	0.81553	0.80959	0.8	0.93497	0	0
50-50	en	ours90	word2vec.run2	cbow	250	surface@stoppy	4	0.6133	0.62895	0.43545	0.80808	0.82241	0.86667	0.93801	0	0	xours86	0.59891	0.61738	0.42591	0.80412	0.81963	0.83333	0.93711	0	0
50-50	en	ours90	word2vec.run2	cbow	250	surface@stoppy	8	0.60613	0.61393	0.41845	0.79592	0.82434	0.83333	0.94712	0	0	xours86	0.59202	0.60046	0.40783	0.79167	0.82119	0.83333	0.94624	0	0
50-50	en	ours90	word2vec.run2	cbow	750	lemma	1	0.62966	0.63132	0.42945	0.8125	0.8549	0.9	0.963	0	0	xours86	0.62515	0.63368	0.43413	0.8172	0.85837	0.86667	0.96362	0	0
50-50	en	ours90	word2vec.run2	cbow	750	lemma	4	0.65223	0.66484	0.47044	0.82979	0.8523	0.9	0.95951	0	0	xours86	0.64743	0.66071	0.4659	0.83516	0.85651	0.9	0.96031	0	0
50-50	en	ours90	word2vec.run2	cbow	750	lemma	8	0.64514	0.66166	0.46994	0.82828	0.84706	0.9	0.9578	0	0	xours86	0.64329	0.66086	0.46973	0.83333	0.85333	0.9	0.95904	0	0
50-50	en	ours90	word2vec.run2	cbow	750	lemmapos	1	0.60843	0.60536	0.42395	0.83516	0.84444	0.86667	0.96249	0	0	xours86	0.61472	0.6142	0.43248	0.84091	0.85247	0.86667	0.96421	0	0
50-50	en	ours90	word2vec.run2	cbow	750	lemmapos	4	0.63473	0.63979	0.44494	0.81395	0.86233	0.9	0.96877	0	0	xours86	0.63281	0.639	0.44234	0.80952	0.86462	0.9	0.96925	0	0
50-50	en	ours90	word2vec.run2	cbow	750	lemmapos	8	0.6294	0.64224	0.45794	0.82222	0.85356	0.86667	0.96543	0	0	xours86	0.63321	0.64655	0.46097	0.84091	0.86006	0.86667	0.96679	0	0
50-50	en	ours90	word2vec.run2	cbow	750	surface	1	0.61389	0.63497	0.44644	0.82243	0.82351	0.86667	0.94628	0	0	xours86	0.60074	0.62294	0.43687	0.82692	0.82271	0.86667	0.94588	0	0
50-50	en	ours90	word2vec.run2	cbow	750	surface	4	0.59313	0.61706	0.41695	0.8125	0.8263	0.86667	0.9473	0	0	xours86	0.5786	0.60428	0.40455	0.80851	0.82535	0.83333	0.94694	0	0
50-50	en	ours90	word2vec.run2	cbow	750	surface	8	0.59058	0.61295	0.41475	0.8	0.81311	0.9	0.93593	0	0	xours86	0.57925	0.60171	0.40542	0.79545	0.81342	0.9	0.93573	0	0
50-50	en	ours90	word2vec.run2	cbow	750	surface@stoppy	1	0.62527	0.64843	0.45044	0.82243	0.84641	0.9	0.95917	0	0	xours86	0.61331	0.64115	0.44673	0.82692	0.84514	0.9	0.95864	0	0
50-50	en	ours90	word2vec.run2	cbow	750	surface@stoppy	4	0.6124	0.65004	0.45194	0.82609	0.83299	0.86667	0.94831	0	0	xours86	0.59767	0.63912	0.44125	0.82222	0.83163	0.86667	0.94788	0	0
50-50	en	ours90	word2vec.run2	cbow	750	surface@stoppy	8	0.62124	0.65625	0.45044	0.82609	0.84328	0.86667	0.95157	0	0	xours86	0.60968	0.64751	0.44234	0.82353	0.84253	0.86667	0.95127	0	0
50-50	en	ours90	word2vec.run2	cbow	500	lemma	1	0.64119	0.644	0.44275	0.82609	0.85699	0.9	0.9605	0	0	xours86	0.63477	0.64186	0.44104	0.83146	0.85885	0.9	0.96076	0	0
50-50	en	ours90	word2vec.run2	cbow	500	lemma	4	0.65464	0.66718	0.46794	0.84211	0.85937	0.9	0.96332	0	0	xours86	0.65138	0.66222	0.46152	0.84783	0.86214	0.9	0.96384	0	0
50-50	en	ours90	word2vec.run2	cbow	500	lemma	8	0.64423	0.65718	0.46244	0.81633	0.84538	0.9	0.95278	0	0	xours86	0.64094	0.65393	0.45878	0.82609	0.84935	0.9	0.95345	0	0
50-50	en	ours90	word2vec.run2	cbow	500	lemmapos	1	0.61487	0.61573	0.42895	0.82979	0.85091	0.86667	0.96506	0	0	xours86	0.61545	0.61928	0.43358	0.83516	0.85466	0.86667	0.96581	0	0
50-50	en	ours90	word2vec.run2	cbow	500	lemmapos	4	0.63537	0.64963	0.45644	0.82222	0.86186	0.9	0.96797	0	0	xours86	0.63359	0.64853	0.45494	0.81818	0.86447	0.9	0.96851	0	0
50-50	en	ours90	word2vec.run2	cbow	500	lemmapos	8	0.62253	0.62517	0.43195	0.82222	0.85433	0.86667	0.96652	0	0	xours86	0.6261	0.63152	0.43522	0.84091	0.86222	0.86667	0.9682	0	0
50-50	en	ours90	word2vec.run2	cbow	500	surface	1	0.59768	0.61868	0.42345	0.81188	0.81426	0.86667	0.94105	0	0	xours86	0.58666	0.60907	0.4155	0.81633	0.81476	0.83333	0.9409	0	0
50-50	en	ours90	word2vec.run2	cbow	500	surface	4	0.59986	0.62636	0.42395	0.80435	0.82239	0.86667	0.93796	0	0	xours86	0.584	0.61414	0.41167	0.8	0.82085	0.86667	0.93733	0	0
50-50	en	ours90	word2vec.run2	cbow	500	surface	8	0.59593	0.61963	0.41895	0.8	0.81479	0.86667	0.93592	0	0	xours86	0.58376	0.60802	0.40893	0.79545	0.8145	0.86667	0.93559	0	0
50-50	en	ours90	word2vec.run2	cbow	500	surface@stoppy	1	0.6191	0.63589	0.44095	0.82	0.84388	0.86667	0.96111	0	0	xours86	0.60727	0.62455	0.43358	0.81633	0.83994	0.86667	0.95978	0	0
50-50	en	ours90	word2vec.run2	cbow	500	surface@stoppy	4	0.60951	0.62571	0.42845	0.8172	0.82218	0.86667	0.93722	0	0	xours86	0.59617	0.61212	0.41496	0.81319	0.81925	0.86667	0.93629	0	0
50-50	en	ours90	word2vec.run2	cbow	500	surface@stoppy	8	0.60965	0.63477	0.43095	0.8	0.82627	0.86667	0.93937	0	0	xours86	0.59584	0.62445	0.42208	0.79612	0.8246	0.86667	0.93875	0	0
50-50	en	ours90	word2vec.run2	skipgram	250	lemma	1	0.61951	0.62763	0.43125	0.82	0.85446	0.86667	0.96221	0	0	xours86	0.61263	0.62398	0.42898	0.82474	0.85607	0.86667	0.96243	0	0
50-50	en	ours90	word2vec.run2	skipgram	250	lemma	4	0.63906	0.65797	0.46044	0.83516	0.84934	0.9	0.95406	0	0	xours86	0.63553	0.65259	0.4544	0.83721	0.85109	0.9	0.9543	0	0
50-50	en	ours90	word2vec.run2	skipgram	250	lemma	8	0.63379	0.64798	0.44844	0.80851	0.83842	0.9	0.94293	0	0	xours86	0.63158	0.64526	0.44508	0.81818	0.84231	0.9	0.94349	0	0
50-50	en	ours90	word2vec.run2	skipgram	250	lemmapos	1	0.61384	0.61556	0.41745	0.8	0.85935	0.9	0.96867	0	0	xours86	0.61815	0.61772	0.41989	0.8125	0.86236	0.9	0.96926	0	0
50-50	en	ours90	word2vec.run2	skipgram	250	lemmapos	4	0.62331	0.6475	0.44694	0.8125	0.86414	0.9	0.96898	0	0	xours86	0.62476	0.64729	0.44508	0.8172	0.86771	0.9	0.96972	0	0
50-50	en	ours90	word2vec.run2	skipgram	250	lemmapos	8	0.61587	0.63128	0.44095	0.82105	0.85348	0.86667	0.96586	0	0	xours86	0.61721	0.63322	0.4407	0.82609	0.85872	0.86667	0.96697	0	0
50-50	en	ours90	word2vec.run2	skipgram	250	surface	1	0.61706	0.63101	0.43895	0.81633	0.81464	0.83333	0.94237	0	0	xours86	0.60548	0.61824	0.42646	0.82105	0.81406	0.83333	0.942	0	0
50-50	en	ours90	word2vec.run2	skipgram	250	surface	4	0.59688	0.61125	0.41245	0.8	0.81591	0.86667	0.93668	0	0	xours86	0.58104	0.59965	0.4029	0.7957	0.81416	0.86667	0.93601	0	0
50-50	en	ours90	word2vec.run2	skipgram	250	surface	8	0.59371	0.60643	0.40495	0.81395	0.81442	0.86667	0.93598	0	0	xours86	0.58207	0.59501	0.39414	0.80952	0.81352	0.86667	0.93553	0	0
50-50	en	ours90	word2vec.run2	skipgram	250	surface@stoppy	1	0.60296	0.61569	0.42145	0.81188	0.80985	0.83333	0.90882	0	0	xours86	0.59074	0.60602	0.4155	0.81633	0.80713	0.8	0.90734	0	0
50-50	en	ours90	word2vec.run2	skipgram	250	surface@stoppy	4	0.61087	0.62566	0.43245	0.82828	0.82081	0.83333	0.93741	0	0	xours86	0.59734	0.61507	0.42262	0.82474	0.81808	0.83333	0.93649	0	0
50-50	en	ours90	word2vec.run2	skipgram	250	surface@stoppy	8	0.60993	0.62278	0.42445	0.79167	0.82427	0.83333	0.94711	0	0	xours86	0.59492	0.61125	0.4166	0.78846	0.82198	0.83333	0.94641	0	0
50-50	en	ours90	word2vec.run2	skipgram	750	lemma	1	0.6271	0.63033	0.42195	0.82609	0.86197	0.9	0.96618	0	0	xours86	0.62232	0.63154	0.42372	0.83146	0.86526	0.9	0.96681	0	0
50-50	en	ours90	word2vec.run2	skipgram	750	lemma	4	0.64834	0.66651	0.47044	0.83516	0.85426	0.86667	0.95994	0	0	xours86	0.64337	0.66217	0.4648	0.84091	0.85825	0.86667	0.9607	0	0
50-50	en	ours90	word2vec.run2	skipgram	750	lemma	8	0.6365	0.64888	0.45694	0.8	0.8397	0.9	0.95583	0	0	xours86	0.63319	0.64647	0.45385	0.80392	0.84413	0.9	0.95668	0	0
50-50	en	ours90	word2vec.run2	skipgram	750	lemmapos	1	0.60689	0.5968	0.40945	0.82222	0.84857	0.86667	0.96437	0	0	xours86	0.61436	0.60548	0.41824	0.83721	0.85512	0.86667	0.96567	0	0
50-50	en	ours90	word2vec.run2	skipgram	750	lemmapos	4	0.63031	0.64649	0.45194	0.8172	0.85967	0.9	0.96731	0	0	xours86	0.62966	0.64953	0.4544	0.82222	0.86499	0.9	0.96842	0	0
50-50	en	ours90	word2vec.run2	skipgram	750	lemmapos	8	0.6209	0.62499	0.43845	0.8172	0.85123	0.86667	0.96468	0	0	xours86	0.6217	0.62801	0.44125	0.83516	0.85787	0.86667	0.96605	0	0
50-50	en	ours90	word2vec.run2	skipgram	750	surface	1	0.61662	0.6305	0.43045	0.81188	0.82391	0.86667	0.94657	0	0	xours86	0.60688	0.62669	0.42865	0.81633	0.82705	0.86667	0.94706	0	0
50-50	en	ours90	word2vec.run2	skipgram	750	surface	4	0.59756	0.62906	0.43095	0.82	0.83007	0.86667	0.94855	0	0	xours86	0.58365	0.61679	0.41989	0.81633	0.82774	0.86667	0.94786	0	0
50-50	en	ours90	word2vec.run2	skipgram	750	surface	8	0.59065	0.61608	0.41245	0.7957	0.81483	0.86667	0.9361	0	0	xours86	0.57869	0.60431	0.4029	0.79121	0.81426	0.86667	0.93572	0	0
50-50	en	ours90	word2vec.run2	skipgram	750	surface@stoppy	1	0.62073	0.64957	0.45394	0.83516	0.84911	0.86667	0.95873	0	0	xours86	0.60972	0.64119	0.44673	0.83146	0.84705	0.86667	0.95803	0	0
50-50	en	ours90	word2vec.run2	skipgram	750	surface@stoppy	4	0.61441	0.64596	0.44794	0.81188	0.83903	0.9	0.94982	0	0	xours86	0.59938	0.63516	0.43906	0.80808	0.83675	0.9	0.94918	0	0
50-50	en	ours90	word2vec.run2	skipgram	750	surface@stoppy	8	0.60842	0.64275	0.44294	0.81905	0.83198	0.86667	0.94826	0	0	xours86	0.59418	0.63373	0.43632	0.82353	0.83037	0.86667	0.94768	0	0
50-50	en	ours90	word2vec.run2	skipgram	500	lemma	1	0.62776	0.62124	0.42995	0.80412	0.84392	0.9	0.95768	0	0	xours86	0.61962	0.6151	0.42208	0.80851	0.84481	0.9	0.95776	0	0
50-50	en	ours90	word2vec.run2	skipgram	500	lemma	4	0.63816	0.65518	0.45644	0.83333	0.84921	0.9	0.95871	0	0	xours86	0.63436	0.65402	0.45494	0.83871	0.85416	0.9	0.95968	0	0
50-50	en	ours90	word2vec.run2	skipgram	500	lemma	8	0.64475	0.65957	0.46394	0.82609	0.84683	0.9	0.95347	0	0	xours86	0.64255	0.65917	0.46371	0.84444	0.85217	0.9	0.95445	0	0
50-50	en	ours90	word2vec.run2	skipgram	500	lemmapos	1	0.61254	0.60877	0.41545	0.8172	0.85272	0.9	0.96588	0	0	xours86	0.61334	0.61235	0.41934	0.82222	0.85718	0.9	0.96681	0	0
50-50	en	ours90	word2vec.run2	skipgram	500	lemmapos	4	0.64784	0.65923	0.46594	0.82609	0.86491	0.86667	0.96854	0	0	xours86	0.64689	0.65833	0.46426	0.83146	0.86828	0.86667	0.96924	0	0
50-50	en	ours90	word2vec.run2	skipgram	500	lemmapos	8	0.62435	0.63338	0.44195	0.82609	0.85401	0.86667	0.96611	0	0	xours86	0.62704	0.6374	0.44399	0.84444	0.85949	0.86667	0.96725	0	0
50-50	en	ours90	word2vec.run2	skipgram	500	surface	1	0.60947	0.62178	0.43145	0.81905	0.8142	0.83333	0.93472	0	0	xours86	0.59827	0.60862	0.42043	0.82353	0.81273	0.8	0.93404	0	0
50-50	en	ours90	word2vec.run2	skipgram	500	surface	4	0.59758	0.62994	0.42695	0.8046	0.82964	0.86667	0.9481	0	0	xours86	0.5846	0.61779	0.41496	0.80851	0.82884	0.86667	0.94776	0	0
50-50	en	ours90	word2vec.run2	skipgram	500	surface	8	0.60286	0.62686	0.43195	0.8	0.81372	0.86667	0.93583	0	0	xours86	0.58966	0.61512	0.42153	0.79545	0.81259	0.86667	0.93532	0	0
50-50	en	ours90	word2vec.run2	skipgram	500	surface@stoppy	1	0.60935	0.61653	0.41545	0.79592	0.83387	0.86667	0.95496	0	0	xours86	0.5978	0.60716	0.41222	0.79167	0.83023	0.83333	0.95369	0	0
50-50	en	ours90	word2vec.run2	skipgram	500	surface@stoppy	4	0.61561	0.63876	0.44045	0.82609	0.82947	0.86667	0.93902	0	0	xours86	0.60289	0.62774	0.42975	0.82222	0.82756	0.86667	0.93832	0	0
50-50	en	ours90	word2vec.run2	skipgram	500	surface@stoppy	8	0.61013	0.63311	0.43245	0.81319	0.83309	0.86667	0.95298	0	0	xours86	0.59784	0.62388	0.42591	0.80899	0.83281	0.86667	0.95281	0	0
50-50	en	ours90	word2vec.run3	cbow	250	lemma	1	0.63271	0.63894	0.44095	0.83871	0.8563	0.86667	0.96256	0	0	xours86	0.62649	0.6354	0.43851	0.84444	0.85859	0.86667	0.96292	0	0
50-50	en	ours90	word2vec.run3	cbow	250	lemma	4	0.62364	0.63603	0.44244	0.82222	0.83195	0.86667	0.94094	0	0	xours86	0.62027	0.63236	0.43741	0.82759	0.83536	0.86667	0.94141	0	0
50-50	en	ours90	word2vec.run3	cbow	250	lemma	8	0.63006	0.6499	0.45494	0.82105	0.83442	0.9	0.94128	0	0	xours86	0.62827	0.64808	0.45221	0.82609	0.83883	0.9	0.94195	0	0
50-50	en	ours90	word2vec.run3	cbow	250	lemmapos	1	0.624	0.62575	0.43395	0.79592	0.85587	0.86667	0.96795	0	0	xours86	0.62674	0.62853	0.43632	0.80851	0.85901	0.86667	0.96853	0	0
50-50	en	ours90	word2vec.run3	cbow	250	lemmapos	4	0.63203	0.65562	0.45144	0.82222	0.86804	0.9	0.96978	0	0	xours86	0.63351	0.65597	0.45056	0.82759	0.87083	0.9	0.97035	0	0
50-50	en	ours90	word2vec.run3	cbow	250	lemmapos	8	0.6157	0.63228	0.43825	0.81319	0.85516	0.86667	0.96605	0	0	xours86	0.61858	0.63464	0.44049	0.83146	0.85999	0.86667	0.96705	0	0
50-50	en	ours90	word2vec.run3	cbow	250	surface	1	0.61783	0.63534	0.43595	0.83333	0.82336	0.86667	0.94471	0	0	xours86	0.60386	0.62178	0.42372	0.82979	0.82145	0.86667	0.9441	0	0
50-50	en	ours90	word2vec.run3	cbow	250	surface	4	0.61919	0.62854	0.42795	0.81319	0.82822	0.9	0.9486	0	0	xours86	0.60348	0.61901	0.42098	0.80899	0.82604	0.86667	0.94795	0	0
50-50	en	ours90	word2vec.run3	cbow	250	surface	8	0.58835	0.59808	0.40445	0.79545	0.8174	0.86667	0.94614	0	0	xours86	0.57652	0.58731	0.39523	0.7907	0.81664	0.86667	0.94582	0	0
50-50	en	ours90	word2vec.run3	cbow	250	surface@stoppy	1	0.59537	0.60585	0.41295	0.80412	0.82115	0.8	0.94665	0	0	xours86	0.58541	0.59546	0.40674	0.80808	0.81868	0.8	0.94573	0	0
50-50	en	ours90	word2vec.run3	cbow	250	surface@stoppy	4	0.60232	0.62089	0.42395	0.80435	0.82303	0.86667	0.93788	0	0	xours86	0.58881	0.61038	0.41496	0.8	0.82053	0.86667	0.93706	0	0
50-50	en	ours90	word2vec.run3	cbow	250	surface@stoppy	8	0.60683	0.61929	0.42045	0.8	0.82633	0.86667	0.94762	0	0	xours86	0.59405	0.60805	0.41167	0.7963	0.82503	0.86667	0.94714	0	0
50-50	en	ours90	word2vec.run3	cbow	750	lemma	1	0.64146	0.64287	0.44794	0.82474	0.86519	0.86667	0.96864	0	0	xours86	0.63745	0.64423	0.45111	0.82979	0.86843	0.86667	0.96909	0	0
50-50	en	ours90	word2vec.run3	cbow	750	lemma	4	0.6512	0.67277	0.47744	0.82609	0.8574	0.9	0.96075	0	0	xours86	0.64758	0.66864	0.47357	0.83146	0.86119	0.9	0.96145	0	0
50-50	en	ours90	word2vec.run3	cbow	750	lemma	8	0.63881	0.65489	0.45944	0.81319	0.85398	0.9	0.9601	0	0	xours86	0.63698	0.65351	0.45823	0.83146	0.86011	0.9	0.9613	0	0
50-50	en	ours90	word2vec.run3	cbow	750	lemmapos	1	0.63129	0.63638	0.44244	0.84444	0.8627	0.86667	0.96823	0	0	xours86	0.63497	0.642	0.45056	0.85057	0.86656	0.86667	0.96891	0	0
50-50	en	ours90	word2vec.run3	cbow	750	lemmapos	4	0.63088	0.63594	0.44594	0.82222	0.85565	0.86667	0.96466	0	0	xours86	0.62813	0.63325	0.44125	0.82759	0.8586	0.86667	0.96525	0	0
50-50	en	ours90	word2vec.run3	cbow	750	lemmapos	8	0.62333	0.6318	0.44444	0.82222	0.85117	0.86667	0.96337	0	0	xours86	0.62308	0.63266	0.44289	0.82759	0.85398	0.86667	0.96394	0	0
50-50	en	ours90	word2vec.run3	cbow	750	surface	1	0.61153	0.62883	0.43145	0.80851	0.82379	0.86667	0.94643	0	0	xours86	0.59837	0.62037	0.42536	0.81319	0.82419	0.86667	0.94631	0	0
50-50	en	ours90	word2vec.run3	cbow	750	surface	4	0.60757	0.62429	0.42745	0.8046	0.82749	0.9	0.94645	0	0	xours86	0.59201	0.6121	0.41715	0.8	0.82558	0.86667	0.94586	0	0
50-50	en	ours90	word2vec.run3	cbow	750	surface	8	0.60338	0.62664	0.42845	0.81818	0.82366	0.86667	0.94679	0	0	xours86	0.5906	0.61479	0.41715	0.81395	0.82282	0.86667	0.94645	0	0
50-50	en	ours90	word2vec.run3	cbow	750	surface@stoppy	1	0.60739	0.63534	0.43895	0.82692	0.84132	0.86667	0.95595	0	0	xours86	0.59423	0.6259	0.43468	0.83168	0.83947	0.86667	0.95527	0	0
50-50	en	ours90	word2vec.run3	cbow	750	surface@stoppy	4	0.60898	0.64226	0.43945	0.81319	0.83471	0.86667	0.9493	0	0	xours86	0.59524	0.63127	0.4292	0.80899	0.83334	0.86667	0.94887	0	0
50-50	en	ours90	word2vec.run3	cbow	750	surface@stoppy	8	0.61372	0.64558	0.44325	0.81633	0.83372	0.86667	0.9489	0	0	xours86	0.59999	0.63565	0.43282	0.8125	0.83286	0.86667	0.94856	0	0
50-50	en	ours90	word2vec.run3	cbow	500	lemma	1	0.63812	0.63739	0.43395	0.84211	0.85648	0.9	0.96015	0	0	xours86	0.63335	0.63603	0.43248	0.84783	0.85897	0.86667	0.96054	0	0
50-50	en	ours90	word2vec.run3	cbow	500	lemma	4	0.64889	0.66468	0.46544	0.84211	0.85354	0.9	0.95967	0	0	xours86	0.64554	0.66163	0.46152	0.84783	0.85755	0.9	0.96042	0	0
50-50	en	ours90	word2vec.run3	cbow	500	lemma	8	0.63346	0.64531	0.44794	0.81319	0.84509	0.9	0.95352	0	0	xours86	0.63042	0.64501	0.44673	0.83146	0.85139	0.9	0.9547	0	0
50-50	en	ours90	word2vec.run3	cbow	500	lemmapos	1	0.62206	0.62272	0.42395	0.83871	0.86806	0.86667	0.97036	0	0	xours86	0.62409	0.62768	0.42865	0.84444	0.87202	0.86667	0.97114	0	0
50-50	en	ours90	word2vec.run3	cbow	500	lemmapos	4	0.64479	0.65895	0.46594	0.82609	0.86783	0.86667	0.96914	0	0	xours86	0.64444	0.65839	0.46261	0.83146	0.87075	0.86667	0.96974	0	0
50-50	en	ours90	word2vec.run3	cbow	500	lemmapos	8	0.61897	0.62631	0.43845	0.80899	0.85307	0.86667	0.96587	0	0	xours86	0.61985	0.62854	0.43961	0.82759	0.85833	0.86667	0.96696	0	0
50-50	en	ours90	word2vec.run3	cbow	500	surface	1	0.61924	0.63614	0.44394	0.81633	0.82607	0.83333	0.94719	0	0	xours86	0.60778	0.62446	0.43358	0.82105	0.82556	0.83333	0.94684	0	0
50-50	en	ours90	word2vec.run3	cbow	500	surface	4	0.61335	0.63186	0.43595	0.81319	0.83013	0.9	0.94824	0	0	xours86	0.59758	0.62042	0.42536	0.80899	0.82809	0.86667	0.94764	0	0
50-50	en	ours90	word2vec.run3	cbow	500	surface	8	0.60512	0.62854	0.42845	0.81395	0.81917	0.86667	0.93703	0	0	xours86	0.59444	0.61946	0.42153	0.82353	0.81957	0.86667	0.93684	0	0
50-50	en	ours90	word2vec.run3	cbow	500	surface@stoppy	1	0.62041	0.63609	0.43945	0.81481	0.83815	0.86667	0.95778	0	0	xours86	0.61237	0.63146	0.43906	0.81905	0.83809	0.83333	0.9575	0	0
50-50	en	ours90	word2vec.run3	cbow	500	surface@stoppy	4	0.60893	0.62994	0.43145	0.82105	0.82461	0.86667	0.93795	0	0	xours86	0.59435	0.6187	0.42153	0.8172	0.82194	0.86667	0.93709	0	0
50-50	en	ours90	word2vec.run3	cbow	500	surface@stoppy	8	0.61286	0.63389	0.43595	0.81818	0.82155	0.86667	0.93774	0	0	xours86	0.59887	0.6246	0.42865	0.81395	0.82084	0.86667	0.93732	0	0
50-50	en	ours90	word2vec.run3	skipgram	250	lemma	1	0.59834	0.6069	0.40445	0.82979	0.84016	0.86667	0.95761	0	0	xours86	0.59214	0.60476	0.4029	0.83516	0.84122	0.86667	0.95771	0	0
50-50	en	ours90	word2vec.run3	skipgram	250	lemma	4	0.63939	0.65432	0.46144	0.83516	0.84418	0.86667	0.95231	0	0	xours86	0.63566	0.64885	0.45549	0.84091	0.84605	0.86667	0.95257	0	0
50-50	en	ours90	word2vec.run3	skipgram	250	lemma	8	0.61763	0.6325	0.43795	0.80435	0.8256	0.86667	0.93726	0	0	xours86	0.61838	0.6328	0.43687	0.80899	0.83075	0.86667	0.93808	0	0
50-50	en	ours90	word2vec.run3	skipgram	250	lemmapos	1	0.62791	0.62952	0.42945	0.8172	0.86249	0.93333	0.96863	0	0	xours86	0.63053	0.63458	0.43303	0.82222	0.86788	0.93333	0.96976	0	0
50-50	en	ours90	word2vec.run3	skipgram	250	lemmapos	4	0.63527	0.65988	0.46144	0.82609	0.86499	0.9	0.96868	0	0	xours86	0.6368	0.6613	0.46261	0.83146	0.86977	0.9	0.96967	0	0
50-50	en	ours90	word2vec.run3	skipgram	250	lemmapos	8	0.61574	0.63012	0.43695	0.82222	0.85477	0.86667	0.96594	0	0	xours86	0.62095	0.63422	0.43851	0.82759	0.86153	0.86667	0.96738	0	0
50-50	en	ours90	word2vec.run3	skipgram	250	surface	1	0.61334	0.62799	0.43145	0.80808	0.81951	0.83333	0.94472	0	0	xours86	0.59949	0.61431	0.41879	0.8125	0.81799	0.83333	0.94417	0	0
50-50	en	ours90	word2vec.run3	skipgram	250	surface	4	0.59875	0.61682	0.41645	0.80435	0.81986	0.86667	0.94629	0	0	xours86	0.58135	0.60606	0.40783	0.8	0.81788	0.86667	0.94568	0	0
50-50	en	ours90	word2vec.run3	skipgram	250	surface	8	0.60442	0.61213	0.41195	0.81395	0.81674	0.86667	0.93683	0	0	xours86	0.59321	0.60056	0.40126	0.80952	0.81594	0.86667	0.9364	0	0
50-50	en	ours90	word2vec.run3	skipgram	250	surface@stoppy	1	0.59479	0.61188	0.41645	0.82692	0.81399	0.83333	0.93531	0	0	xours86	0.58165	0.60216	0.41002	0.83168	0.81228	0.83333	0.93442	0	0
50-50	en	ours90	word2vec.run3	skipgram	250	surface@stoppy	4	0.61712	0.63339	0.43895	0.8125	0.82081	0.86667	0.93766	0	0	xours86	0.60349	0.62146	0.4281	0.80851	0.81795	0.86667	0.93675	0	0
50-50	en	ours90	word2vec.run3	skipgram	250	surface@stoppy	8	0.60993	0.62715	0.42995	0.80769	0.82071	0.86667	0.93718	0	0	xours86	0.59432	0.61597	0.42208	0.80769	0.81815	0.86667	0.93631	0	0
50-50	en	ours90	word2vec.run3	skipgram	750	lemma	1	0.62501	0.63524	0.43395	0.81319	0.8613	0.9	0.96617	0	0	xours86	0.62165	0.63717	0.43796	0.82	0.86308	0.9	0.96634	0	0
50-50	en	ours90	word2vec.run3	skipgram	750	lemma	4	0.65582	0.67555	0.47894	0.82979	0.85433	0.9	0.95903	0	0	xours86	0.65185	0.67239	0.47576	0.83516	0.8586	0.9	0.95983	0	0
50-50	en	ours90	word2vec.run3	skipgram	750	lemma	8	0.64069	0.65508	0.45894	0.8125	0.85149	0.9	0.95939	0	0	xours86	0.63747	0.65248	0.45604	0.8172	0.85539	0.9	0.96012	0	0
50-50	en	ours90	word2vec.run3	skipgram	750	lemmapos	1	0.6202	0.61563	0.42325	0.8172	0.84922	0.86667	0.96455	0	0	xours86	0.62594	0.62365	0.43117	0.83146	0.85521	0.86667	0.96572	0	0
50-50	en	ours90	word2vec.run3	skipgram	750	lemmapos	4	0.63358	0.63292	0.44394	0.82609	0.85655	0.86667	0.96638	0	0	xours86	0.63514	0.63356	0.44125	0.83146	0.86099	0.86667	0.96731	0	0
50-50	en	ours90	word2vec.run3	skipgram	750	lemmapos	8	0.63207	0.64128	0.44195	0.8172	0.86419	0.9	0.96859	0	0	xours86	0.63102	0.64299	0.44399	0.83146	0.8686	0.9	0.96949	0	0
50-50	en	ours90	word2vec.run3	skipgram	750	surface	1	0.59849	0.62101	0.43145	0.80734	0.81883	0.86667	0.94442	0	0	xours86	0.58633	0.61052	0.42262	0.81132	0.81901	0.86667	0.94424	0	0
50-50	en	ours90	word2vec.run3	skipgram	750	surface	4	0.60191	0.63098	0.43545	0.80412	0.82377	0.86667	0.94676	0	0	xours86	0.58732	0.61867	0.42372	0.80412	0.82275	0.86667	0.94637	0	0
50-50	en	ours90	word2vec.run3	skipgram	750	surface	8	0.608	0.63143	0.43495	0.80435	0.81625	0.86667	0.93647	0	0	xours86	0.59505	0.61934	0.42262	0.8	0.81494	0.86667	0.93592	0	0
50-50	en	ours90	word2vec.run3	skipgram	750	surface@stoppy	1	0.62103	0.63791	0.44244	0.81553	0.84589	0.86667	0.96046	0	0	xours86	0.60824	0.62835	0.43577	0.81188	0.84329	0.86667	0.95969	0	0
50-50	en	ours90	word2vec.run3	skipgram	750	surface@stoppy	4	0.62753	0.65488	0.45194	0.83516	0.84991	0.86667	0.95921	0	0	xours86	0.61281	0.64526	0.44399	0.83146	0.84782	0.86667	0.95868	0	0
50-50	en	ours90	word2vec.run3	skipgram	750	surface@stoppy	8	0.61364	0.63924	0.43895	0.82	0.83691	0.86667	0.95068	0	0	xours86	0.60162	0.63069	0.43303	0.82474	0.83575	0.86667	0.95023	0	0
50-50	en	ours90	word2vec.run3	skipgram	500	lemma	1	0.63332	0.63524	0.43945	0.82979	0.85563	0.9	0.96079	0	0	xours86	0.63044	0.63756	0.44344	0.83516	0.85761	0.9	0.96097	0	0
50-50	en	ours90	word2vec.run3	skipgram	500	lemma	4	0.64766	0.65949	0.46694	0.82979	0.84761	0.9	0.95824	0	0	xours86	0.64695	0.65849	0.4659	0.83516	0.85293	0.9	0.95928	0	0
50-50	en	ours90	word2vec.run3	skipgram	500	lemma	8	0.62935	0.64433	0.45294	0.80808	0.8398	0.9	0.95218	0	0	xours86	0.62684	0.64377	0.45221	0.8125	0.84451	0.9	0.95305	0	0
50-50	en	ours90	word2vec.run3	skipgram	500	lemmapos	1	0.60318	0.59223	0.39845	0.7907	0.83887	0.86667	0.96215	0	0	xours86	0.60388	0.59362	0.40016	0.7957	0.84052	0.86667	0.96236	0	0
50-50	en	ours90	word2vec.run3	skipgram	500	lemmapos	4	0.63895	0.64064	0.45294	0.82979	0.861	0.86667	0.9673	0	0	xours86	0.63729	0.64072	0.44947	0.83516	0.86452	0.86667	0.96803	0	0
50-50	en	ours90	word2vec.run3	skipgram	500	lemmapos	8	0.62861	0.64071	0.44844	0.82105	0.85339	0.86667	0.9641	0	0	xours86	0.62949	0.64321	0.44892	0.82609	0.85896	0.86667	0.96525	0	0
50-50	en	ours90	word2vec.run3	skipgram	500	surface	1	0.60226	0.61872	0.43395	0.81633	0.80545	0.86667	0.93776	0	0	xours86	0.58975	0.60426	0.42208	0.82105	0.80409	0.83333	0.93719	0	0
50-50	en	ours90	word2vec.run3	skipgram	500	surface	4	0.59768	0.62684	0.42495	0.8125	0.821	0.86667	0.93763	0	0	xours86	0.58266	0.61609	0.41496	0.8172	0.82035	0.86667	0.93718	0	0
50-50	en	ours90	word2vec.run3	skipgram	500	surface	8	0.60845	0.62856	0.42895	0.80899	0.81745	0.86667	0.93667	0	0	xours86	0.5952	0.61713	0.41934	0.8046	0.8162	0.86667	0.93613	0	0
50-50	en	ours90	word2vec.run3	skipgram	500	surface@stoppy	1	0.61621	0.62159	0.42395	0.79646	0.82963	0.9	0.9524	0	0	xours86	0.60417	0.61178	0.41715	0.8	0.82726	0.86667	0.95164	0	0
50-50	en	ours90	word2vec.run3	skipgram	500	surface@stoppy	4	0.61183	0.64171	0.43745	0.82609	0.83357	0.86667	0.93959	0	0	xours86	0.59448	0.63258	0.43084	0.82222	0.83111	0.86667	0.93878	0	0
50-50	en	ours90	word2vec.run3	skipgram	500	surface@stoppy	8	0.61848	0.64016	0.44095	0.81818	0.82466	0.86667	0.93847	0	0	xours86	0.6049	0.63036	0.43248	0.81395	0.82376	0.86667	0.93801	0	0
50-50	en	ours90	minimantics	salehi	1000	lemma	1	0.43962	0.46989	0.31746	0.7234	0.72793	0.73333	0.92269	0	0	xours86	0.43943	0.48023	0.32512	0.73913	0.74113	0.76667	0.92583	0	0
50-50	en	ours90	minimantics	salehi	1000	lemma	4	0.5438	0.56385	0.38995	0.75	0.78547	0.83333	0.94449	0	0	xours86	0.54466	0.56516	0.39085	0.75789	0.79418	0.83333	0.94644	0	0
50-50	en	ours90	minimantics	salehi	1000	lemma	8	0.541	0.55725	0.38175	0.74336	0.79354	0.8	0.94916	0	0	xours86	0.53781	0.55715	0.38132	0.74545	0.80065	0.8	0.95074	0	0
50-50	en	ours90	minimantics	salehi	1000	lemmapos	1	0.40247	0.42978	0.27697	0.7191	0.72101	0.8	0.91079	0	0	xours86	0.40157	0.43781	0.28184	0.73563	0.7352	0.8	0.91413	0	0
50-50	en	ours90	minimantics	salehi	1000	lemmapos	4	0.50928	0.53772	0.36245	0.77083	0.77855	0.83333	0.93639	0	0	xours86	0.50913	0.5417	0.36565	0.78723	0.78861	0.83333	0.93855	0	0
50-50	en	ours90	minimantics	salehi	1000	lemmapos	8	0.50838	0.54391	0.36645	0.74747	0.79872	0.83333	0.94684	0	0	xours86	0.50436	0.54572	0.36839	0.76404	0.80643	0.83333	0.94847	0	0
50-50	en	ours90	minimantics	salehi	1000	surface	1	0.37238	0.36419	0.23697	0.69841	0.6988	0.76667	0.90389	0	0	xours86	0.36344	0.3559	0.2309	0.70769	0.70292	0.76667	0.90462	0	0
50-50	en	ours90	minimantics	salehi	1000	surface	4	0.49022	0.51621	0.35146	0.76	0.77086	0.83333	0.93757	0	0	xours86	0.47438	0.5022	0.33936	0.7551	0.77178	0.83333	0.93769	0	0
50-50	en	ours90	minimantics	salehi	1000	surface	8	0.48446	0.50157	0.33346	0.74157	0.77571	0.83333	0.93767	0	0	xours86	0.47278	0.49589	0.32731	0.75	0.7803	0.83333	0.93859	0	0
50-50	en	ours90	minimantics	salehi	1000	surface@stoppy	1	0.3519	0.36628	0.22425	0.71154	0.70513	0.76667	0.91168	0	1	xours86	0.35443	0.37214	0.22925	0.72549	0.71307	0.76667	0.9134	0	1
50-50	en	ours90	minimantics	salehi	1000	surface@stoppy	4	0.48978	0.50501	0.34396	0.73913	0.74302	0.8	0.91515	0	0	xours86	0.48263	0.50555	0.34429	0.74725	0.74755	0.8	0.91591	0	0
50-50	en	ours90	minimantics	salehi	1000	surface@stoppy	8	0.53232	0.54858	0.38275	0.76	0.78191	0.83333	0.93568	0	0	xours86	0.52607	0.54965	0.38428	0.76768	0.78725	0.83333	0.93672	0	0
50-50	en	ours90	minimantics	PPMIthreshold	250	lemma	1	0.47331	0.52214	0.35196	0.80392	0.78546	0.83333	0.9397	0	0	xours86	0.46702	0.5192	0.34867	0.80808	0.79024	0.83333	0.94067	0	0
50-50	en	ours90	minimantics	PPMIthreshold	250	lemma	4	0.53416	0.57193	0.38945	0.80899	0.80581	0.83333	0.94575	0	0	xours86	0.53086	0.56782	0.38318	0.8046	0.80798	0.83333	0.94613	0	0
50-50	en	ours90	minimantics	PPMIthreshold	250	lemma	8	0.54147	0.5718	0.39145	0.78261	0.79479	0.83333	0.93678	0	0	xours86	0.53592	0.56655	0.38537	0.77778	0.7964	0.83333	0.93696	0	0
50-50	en	ours90	minimantics	PPMIthreshold	250	lemmapos	1	0.4993	0.5306	0.35846	0.80808	0.80347	0.8	0.94948	0	0	xours86	0.49366	0.52607	0.35196	0.8125	0.8079	0.8	0.95041	0	0
50-50	en	ours90	minimantics	PPMIthreshold	250	lemmapos	4	0.55261	0.56117	0.37745	0.79545	0.81228	0.83333	0.9526	0	0	xours86	0.55008	0.55694	0.37004	0.7957	0.81485	0.83333	0.95314	0	0
50-50	en	ours90	minimantics	PPMIthreshold	250	lemmapos	8	0.56571	0.57084	0.38945	0.8	0.81026	0.83333	0.94494	0	0	xours86	0.56158	0.5671	0.38483	0.79545	0.81255	0.83333	0.94531	0	0
50-50	en	ours90	minimantics	PPMIthreshold	250	surface	1	0.46611	0.55167	0.37275	0.78351	0.79348	0.83333	0.93604	0	0	xours86	0.45251	0.54027	0.36543	0.77895	0.79276	0.83333	0.9357	0	0
50-50	en	ours90	minimantics	PPMIthreshold	250	surface	4	0.46651	0.54328	0.37195	0.79167	0.76527	0.8	0.91407	0	0	xours86	0.45405	0.52873	0.36127	0.78788	0.76436	0.8	0.9135	0	0
50-50	en	ours90	minimantics	PPMIthreshold	250	surface	8	0.46075	0.53244	0.36495	0.79167	0.75391	0.83333	0.90435	0	0	xours86	0.44739	0.51609	0.35032	0.78723	0.75344	0.83333	0.9038	0	0
50-50	en	ours90	minimantics	PPMIthreshold	250	surface@stoppy	1	0.41529	0.42912	0.28546	0.76	0.78078	0.76667	0.94325	0	0	xours86	0.40266	0.41359	0.27472	0.76596	0.78231	0.76667	0.94354	0	0
50-50	en	ours90	minimantics	PPMIthreshold	250	surface@stoppy	4	0.46578	0.54752	0.36845	0.79592	0.78566	0.83333	0.93544	0	0	xours86	0.45357	0.53564	0.36072	0.79167	0.78421	0.8	0.93492	0	0
50-50	en	ours90	minimantics	PPMIthreshold	250	surface@stoppy	8	0.4834	0.5439	0.36595	0.79167	0.78395	0.86667	0.93084	0	0	xours86	0.46912	0.53133	0.35634	0.78723	0.78252	0.83333	0.93029	0	0
50-50	en	ours90	minimantics	PPMIthreshold	750	lemma	1	0.53092	0.55408	0.37845	0.79208	0.80662	0.8	0.94598	0	0	xours86	0.52723	0.54532	0.37058	0.8	0.81032	0.8	0.94668	0	0
50-50	en	ours90	minimantics	PPMIthreshold	750	lemma	4	0.53947	0.58154	0.39195	0.78652	0.80883	0.86667	0.94194	0	0	xours86	0.53784	0.58223	0.38921	0.8046	0.81581	0.86667	0.94329	0	0
50-50	en	ours90	minimantics	PPMIthreshold	750	lemma	8	0.5331	0.58853	0.40395	0.78351	0.79086	0.86667	0.92626	0	0	xours86	0.52509	0.5823	0.39743	0.78723	0.79274	0.86667	0.92637	0	0
50-50	en	ours90	minimantics	PPMIthreshold	750	lemmapos	1	0.55166	0.58396	0.40045	0.8	0.81332	0.86667	0.94441	0	0	xours86	0.54934	0.58162	0.39797	0.80412	0.81886	0.86667	0.94547	0	0
50-50	en	ours90	minimantics	PPMIthreshold	750	lemmapos	4	0.55994	0.5975	0.40795	0.78261	0.81631	0.86667	0.94428	0	0	xours86	0.55887	0.59805	0.40729	0.8	0.82176	0.86667	0.94529	0	0
50-50	en	ours90	minimantics	PPMIthreshold	750	lemmapos	8	0.55836	0.60206	0.41495	0.78351	0.80591	0.86667	0.9332	0	0	xours86	0.55265	0.59831	0.41112	0.8	0.80886	0.86667	0.93357	0	0
50-50	en	ours90	minimantics	PPMIthreshold	750	surface	1	0.52317	0.566	0.37595	0.80808	0.82131	0.86667	0.9515	0	0	xours86	0.5109	0.55355	0.36511	0.80412	0.8221	0.86667	0.95159	0	0
50-50	en	ours90	minimantics	PPMIthreshold	750	surface	4	0.49905	0.59536	0.41195	0.79167	0.79869	0.83333	0.92703	0	0	xours86	0.48854	0.58565	0.40455	0.78846	0.79931	0.83333	0.92685	0	0
50-50	en	ours90	minimantics	PPMIthreshold	750	surface	8	0.47497	0.5733	0.39745	0.7957	0.77258	0.8	0.89285	0	0	xours86	0.46026	0.56018	0.38757	0.79121	0.77181	0.8	0.89201	0	0
50-50	en	ours90	minimantics	PPMIthreshold	750	surface@stoppy	1	0.49264	0.5098	0.34396	0.77273	0.80248	0.83333	0.94687	0	0	xours86	0.47901	0.49218	0.33005	0.78161	0.80198	0.83333	0.94665	0	0
50-50	en	ours90	minimantics	PPMIthreshold	750	surface@stoppy	4	0.51279	0.57383	0.37945	0.82	0.81302	0.86667	0.9418	0	0	xours86	0.50257	0.56526	0.37113	0.81633	0.81332	0.86667	0.9417	0	0
50-50	en	ours90	minimantics	PPMIthreshold	750	surface@stoppy	8	0.50617	0.60108	0.41595	0.80392	0.80834	0.86667	0.93902	0	0	xours86	0.49277	0.5887	0.40509	0.8	0.80702	0.86667	0.93856	0	0
50-50	en	ours90	minimantics	PPMIthreshold	500	lemma	1	0.51473	0.525	0.35146	0.79612	0.79592	0.76667	0.94449	0	0	xours86	0.51176	0.52501	0.34812	0.8	0.80407	0.76667	0.94628	0	0
50-50	en	ours90	minimantics	PPMIthreshold	500	lemma	4	0.53334	0.58544	0.40245	0.78351	0.81154	0.86667	0.94614	0	0	xours86	0.53017	0.58546	0.40071	0.79545	0.8176	0.86667	0.94734	0	0
50-50	en	ours90	minimantics	PPMIthreshold	500	lemma	8	0.53923	0.58682	0.40295	0.77083	0.79047	0.86667	0.92691	0	0	xours86	0.53241	0.58059	0.39578	0.77419	0.79215	0.86667	0.92698	0	0
50-50	en	ours90	minimantics	PPMIthreshold	500	lemmapos	1	0.50584	0.53068	0.35296	0.79592	0.79445	0.8	0.94343	0	0	xours86	0.50234	0.52901	0.35086	0.8	0.80165	0.8	0.94498	0	0
50-50	en	ours90	minimantics	PPMIthreshold	500	lemmapos	4	0.54581	0.57824	0.39395	0.77551	0.81408	0.83333	0.95109	0	0	xours86	0.5445	0.57959	0.3925	0.79121	0.82049	0.83333	0.95242	0	0
50-50	en	ours90	minimantics	PPMIthreshold	500	lemmapos	8	0.55458	0.59442	0.41245	0.7957	0.80309	0.86667	0.9323	0	0	xours86	0.54879	0.58899	0.40783	0.79121	0.80498	0.86667	0.93244	0	0
50-50	en	ours90	minimantics	PPMIthreshold	500	surface	1	0.49864	0.55263	0.37145	0.80392	0.80656	0.86667	0.94069	0	0	xours86	0.48482	0.53597	0.35744	0.8	0.80561	0.86667	0.94032	0	0
50-50	en	ours90	minimantics	PPMIthreshold	500	surface	4	0.47518	0.58144	0.40295	0.79167	0.8044	0.86667	0.94381	0	0	xours86	0.46379	0.57058	0.3925	0.79245	0.80517	0.86667	0.94387	0	0
50-50	en	ours90	minimantics	PPMIthreshold	500	surface	8	0.47393	0.56202	0.38595	0.80851	0.7878	0.83333	0.93561	0	0	xours86	0.45874	0.54875	0.37551	0.80435	0.78667	0.83333	0.9352	0	0
50-50	en	ours90	minimantics	PPMIthreshold	500	surface@stoppy	1	0.45771	0.47751	0.31296	0.7619	0.79917	0.83333	0.94801	0	0	xours86	0.44154	0.45918	0.29773	0.7619	0.79832	0.83333	0.94774	0	0
50-50	en	ours90	minimantics	PPMIthreshold	500	surface@stoppy	4	0.47095	0.54993	0.36495	0.80808	0.7943	0.83333	0.92709	0	0	xours86	0.45835	0.53683	0.35196	0.80412	0.79305	0.83333	0.92653	0	0
50-50	en	ours90	minimantics	PPMIthreshold	500	surface@stoppy	8	0.48451	0.56776	0.38345	0.80851	0.80021	0.83333	0.93812	0	0	xours86	0.47095	0.55583	0.37332	0.80435	0.79903	0.83333	0.93767	0	0
50-50	en	ours90	dissect	svd	250	lemma	1	0.60068	0.60273	0.42095	0.78788	0.81641	0.86667	0.95411	0	0	xours86	0.59577	0.59741	0.41496	0.79167	0.81894	0.86667	0.95463	0	0
50-50	en	ours90	dissect	svd	250	lemma	4	0.60302	0.61574	0.42795	0.7957	0.8233	0.86667	0.95592	0	0	xours86	0.59644	0.60972	0.42208	0.8	0.82718	0.86667	0.95673	0	0
50-50	en	ours90	dissect	svd	250	lemma	8	0.60689	0.63173	0.44794	0.82105	0.83334	0.83333	0.95866	0	0	xours86	0.59883	0.6258	0.44289	0.82609	0.83628	0.83333	0.95926	0	0
50-50	en	ours90	dissect	svd	250	lemmapos	1	0.56549	0.58137	0.41195	0.8	0.80844	0.83333	0.93623	0	0	xours86	0.5474	0.57045	0.40455	0.79545	0.80819	0.83333	0.93592	0	0
50-50	en	ours90	dissect	svd	250	lemmapos	4	0.60691	0.61769	0.43895	0.80899	0.85154	0.93333	0.95997	0	0	xours86	0.59451	0.61095	0.43687	0.81319	0.84973	0.9	0.95934	0	0
50-50	en	ours90	dissect	svd	250	lemmapos	8	0.63705	0.64106	0.45944	0.81188	0.85272	0.86667	0.96294	0	0	xours86	0.62652	0.63267	0.45494	0.81633	0.85021	0.86667	0.9622	0	0
50-50	en	ours90	dissect	svd	250	surface	1	0.62585	0.62386	0.44644	0.82474	0.80548	0.8	0.9408	0	0	xours86	0.61192	0.61164	0.43632	0.82105	0.80507	0.8	0.94058	0	0
50-50	en	ours90	dissect	svd	250	surface	4	0.61684	0.61927	0.43795	0.7963	0.80356	0.8	0.94418	0	0	xours86	0.60204	0.60858	0.43029	0.8	0.80284	0.8	0.94393	0	0
50-50	en	ours90	dissect	svd	250	surface	8	0.61399	0.61519	0.43395	0.8125	0.80552	0.8	0.94515	0	0	xours86	0.59996	0.60525	0.42701	0.80851	0.80511	0.8	0.94498	0	0
50-50	en	ours90	dissect	svd	250	surface@stoppy	1	0.51808	0.51847	0.35396	0.78788	0.79933	0.86667	0.90793	0	0	xours86	0.49819	0.50388	0.34374	0.78351	0.79806	0.86667	0.90704	0	0
50-50	en	ours90	dissect	svd	250	surface@stoppy	4	0.61739	0.61304	0.43495	0.8172	0.80507	0.8	0.94414	0	0	xours86	0.60272	0.60254	0.42646	0.81319	0.80379	0.8	0.94377	0	0
50-50	en	ours90	dissect	svd	250	surface@stoppy	8	0.61759	0.61638	0.43145	0.80851	0.80938	0.8	0.94752	0	0	xours86	0.60275	0.60768	0.42701	0.80435	0.8089	0.8	0.94735	0	0
50-50	en	ours90	dissect	svd	750	lemma	1	0.6413	0.63945	0.45144	0.82	0.85824	0.86667	0.96885	0	0	xours86	0.63823	0.63725	0.44947	0.82474	0.86185	0.86667	0.96962	0	0
50-50	en	ours90	dissect	svd	750	lemma	4	0.63284	0.63997	0.44594	0.82828	0.85356	0.83333	0.96575	0	0	xours86	0.63295	0.64603	0.45001	0.83333	0.86396	0.86667	0.96812	0	0
50-50	en	ours90	dissect	svd	750	lemma	8	0.63889	0.65255	0.45794	0.84848	0.85546	0.83333	0.96547	0	0	xours86	0.63614	0.65591	0.45878	0.85417	0.86445	0.86667	0.96748	0	0
50-50	en	ours90	dissect	svd	750	lemmapos	1	0.53937	0.57203	0.40695	0.80435	0.80664	0.8	0.93528	0	0	xours86	0.51992	0.55745	0.39523	0.8	0.8055	0.8	0.93479	0	0
50-50	en	ours90	dissect	svd	750	lemmapos	4	0.58662	0.59651	0.42145	0.78652	0.83917	0.86667	0.96084	0	0	xours86	0.57508	0.58755	0.4155	0.7907	0.83984	0.86667	0.96092	0	0
50-50	en	ours90	dissect	svd	750	lemmapos	8	0.62437	0.63426	0.45094	0.8	0.84959	0.9	0.96332	0	0	xours86	0.61125	0.62481	0.44454	0.79592	0.84777	0.9	0.96283	0	0
50-50	en	ours90	dissect	svd	750	surface	1	0.65137	0.65965	0.47025	0.82474	0.84603	0.86667	0.96372	0	0	xours86	0.64211	0.65073	0.46405	0.82105	0.84718	0.86667	0.96397	0	0
50-50	en	ours90	dissect	svd	750	surface	4	0.67171	0.68221	0.48044	0.82692	0.8515	0.86667	0.96216	0	0	xours86	0.6618	0.67576	0.47412	0.83168	0.85209	0.86667	0.96222	0	0
50-50	en	ours90	dissect	svd	750	surface	8	0.67104	0.68138	0.48025	0.82	0.86185	0.86667	0.9647	0	0	xours86	0.66062	0.67671	0.47665	0.82474	0.86244	0.86667	0.96474	0	0
50-50	en	ours90	dissect	svd	750	surface@stoppy	1	0.55484	0.54271	0.37095	0.80808	0.83123	0.83333	0.95928	0	0	xours86	0.5386	0.52915	0.36072	0.80412	0.83115	0.83333	0.95922	0	0
50-50	en	ours90	dissect	svd	750	surface@stoppy	4	0.64538	0.64563	0.45344	0.83673	0.8402	0.83333	0.96134	0	0	xours86	0.63464	0.63772	0.44837	0.83333	0.84018	0.83333	0.96134	0	0
50-50	en	ours90	dissect	svd	750	surface@stoppy	8	0.6694	0.67916	0.47844	0.81553	0.85432	0.86667	0.96432	0	0	xours86	0.65866	0.67065	0.47028	0.82	0.85408	0.86667	0.96422	0	0
50-50	en	ours90	dissect	svd	500	lemma	1	0.63475	0.63739	0.45444	0.80412	0.84393	0.86667	0.96375	0	0	xours86	0.63106	0.63611	0.4533	0.80851	0.84757	0.86667	0.96453	0	0
50-50	en	ours90	dissect	svd	500	lemma	4	0.62766	0.63588	0.44894	0.82828	0.84517	0.86667	0.96284	0	0	xours86	0.62515	0.6352	0.44782	0.83333	0.85106	0.86667	0.9641	0	0
50-50	en	ours90	dissect	svd	500	lemma	8	0.63121	0.63789	0.45375	0.84	0.84678	0.83333	0.96282	0	0	xours86	0.62781	0.63678	0.4509	0.84536	0.85343	0.83333	0.96426	0	0
50-50	en	ours90	dissect	svd	500	lemmapos	1	0.56159	0.58799	0.41795	0.82222	0.81105	0.8	0.93649	0	0	xours86	0.54292	0.57529	0.40729	0.81818	0.8103	0.8	0.93608	0	0
50-50	en	ours90	dissect	svd	500	lemmapos	4	0.6074	0.62265	0.44145	0.82222	0.85171	0.9	0.96359	0	0	xours86	0.59613	0.61641	0.43961	0.82759	0.8526	0.86667	0.9637	0	0
50-50	en	ours90	dissect	svd	500	lemmapos	8	0.64011	0.64536	0.46006	0.8	0.85639	0.9	0.96581	0	0	xours86	0.62932	0.63782	0.45638	0.79592	0.85502	0.9	0.96544	0	0
50-50	en	ours90	dissect	svd	500	surface	1	0.64861	0.65275	0.47094	0.83673	0.83664	0.83333	0.95909	0	0	xours86	0.63749	0.64315	0.46426	0.83333	0.83701	0.83333	0.95916	0	0
50-50	en	ours90	dissect	svd	500	surface	4	0.6486	0.6465	0.45694	0.81188	0.83247	0.83333	0.95708	0	0	xours86	0.63687	0.63623	0.44782	0.80808	0.83203	0.83333	0.95693	0	0
50-50	en	ours90	dissect	svd	500	surface	8	0.64484	0.64535	0.45044	0.81188	0.83631	0.83333	0.95784	0	0	xours86	0.63267	0.63731	0.44289	0.81633	0.8363	0.83333	0.95777	0	0
50-50	en	ours90	dissect	svd	500	surface@stoppy	1	0.53193	0.52727	0.35896	0.79592	0.81041	0.83333	0.94944	0	0	xours86	0.51329	0.5111	0.34648	0.79167	0.80928	0.83333	0.9491	0	0
50-50	en	ours90	dissect	svd	500	surface@stoppy	4	0.63206	0.62766	0.44244	0.81553	0.82837	0.8	0.9579	0	0	xours86	0.62077	0.61861	0.43632	0.81188	0.82802	0.8	0.95782	0	0
50-50	en	ours90	dissect	svd	500	surface@stoppy	8	0.65048	0.6484	0.45725	0.81633	0.83576	0.83333	0.95786	0	0	xours86	0.63825	0.63938	0.4498	0.8125	0.83555	0.83333	0.95778	0	0
50-50	en	ours90	glove.avg	default	250	lemma	1	0.40736	0.43976	0.28796	0.73913	0.7591	0.8	0.93339	0	0	xours86	0.38206	0.42509	0.27746	0.74157	0.75889	0.8	0.93305	0	0
50-50	en	ours90	glove.avg	default	250	lemma	4	0.47979	0.49549	0.33696	0.72917	0.78479	0.83333	0.94659	0	0	xours86	0.46179	0.48137	0.32402	0.73118	0.7872	0.83333	0.94708	0	0
50-50	en	ours90	glove.avg	default	250	lemma	8	0.48836	0.50298	0.34696	0.73786	0.7804	0.83333	0.94349	0	0	xours86	0.47228	0.49017	0.33552	0.74	0.78349	0.83333	0.94413	0	0
50-50	en	ours90	glove.avg	default	250	lemmapos	1	0.40716	0.4495	0.29146	0.72941	0.78434	0.83333	0.94911	0	0	xours86	0.38247	0.43893	0.28294	0.73171	0.78293	0.86667	0.94759	0	0
50-50	en	ours90	glove.avg	default	250	lemmapos	4	0.49583	0.49141	0.32646	0.73469	0.78799	0.83333	0.94864	0	0	xours86	0.47894	0.48261	0.318	0.73684	0.7916	0.83333	0.94945	0	0
50-50	en	ours90	glove.avg	default	250	lemmapos	8	0.51818	0.52123	0.35425	0.76	0.79506	0.83333	0.94998	0	0	xours86	0.50163	0.50751	0.34297	0.76289	0.79534	0.83333	0.94998	0	0
50-50	en	ours90	glove.avg	default	250	surface	1	0.38719	0.41198	0.26997	0.73469	0.751	0.83333	0.92786	0	1	xours86	0.36944	0.40139	0.26102	0.75	0.7566	0.83333	0.92899	0	0
50-50	en	ours90	glove.avg	default	250	surface	4	0.39775	0.45049	0.29296	0.72941	0.75694	0.86667	0.92687	0	1	xours86	0.37758	0.44168	0.28622	0.7381	0.76189	0.86667	0.92781	0	0
50-50	en	ours90	glove.avg	default	250	surface	8	-0.00083	0.05059	0.0265	0.69767	0.50807	0.53333	0.70349	0	1	xours86	0.00127	0.05662	0.0304	0.704	0.52085	0.56667	0.70707	0	0
50-50	en	ours90	glove.avg	default	250	surface@stoppy	1	0.36466	0.3703	0.24966	0.6963	0.73212	0.8	0.918	0	4	xours86	0.37196	0.38151	0.25445	0.70769	0.74344	0.8	0.92055	0	0
50-50	en	ours90	glove.avg	default	250	surface@stoppy	4	0.39198	0.41808	0.27717	0.71429	0.77316	0.86667	0.93864	0	4	xours86	0.39984	0.42612	0.28129	0.72289	0.783	0.86667	0.94082	0	0
50-50	en	ours90	glove.avg	default	250	surface@stoppy	8	0.37685	0.39169	0.25666	0.69118	0.73318	0.83333	0.91302	0	4	xours86	0.3844	0.39553	0.25719	0.70476	0.74216	0.83333	0.91488	0	0
50-50	en	ours90	glove.avg	default	750	lemma	1	0.42384	0.45653	0.30096	0.73684	0.76828	0.8	0.94117	0	0	xours86	0.39974	0.4456	0.29334	0.73913	0.76695	0.83333	0.93976	0	0
50-50	en	ours90	glove.avg	default	750	lemma	4	0.47488	0.49011	0.33196	0.74747	0.78595	0.83333	0.94463	0	0	xours86	0.45536	0.47302	0.31745	0.75	0.78608	0.83333	0.94456	0	0
50-50	en	ours90	glove.avg	default	750	lemma	8	0.49707	0.51719	0.35546	0.74	0.79667	0.86667	0.94998	0	0	xours86	0.48019	0.50215	0.34265	0.74227	0.79764	0.86667	0.95013	0	0
50-50	en	ours90	glove.avg	default	750	lemmapos	1	0.41498	0.44781	0.28646	0.74	0.78036	0.83333	0.94643	0	0	xours86	0.39166	0.43824	0.27801	0.74227	0.77728	0.8	0.94361	0	0
50-50	en	ours90	glove.avg	default	750	lemmapos	4	0.50873	0.51618	0.34896	0.7551	0.80783	0.8	0.95538	0	0	xours86	0.49251	0.50721	0.3421	0.75789	0.8102	0.8	0.9558	0	0
50-50	en	ours90	glove.avg	default	750	lemmapos	8	0.52613	0.53251	0.35746	0.76289	0.81304	0.83333	0.95662	0	0	xours86	0.50935	0.51947	0.34812	0.76596	0.81242	0.8	0.95631	0	0
50-50	en	ours90	glove.avg	default	750	surface	1	0.40021	0.42886	0.28596	0.7451	0.76842	0.8	0.93934	0	1	xours86	0.37933	0.41271	0.27308	0.74747	0.7713	0.8	0.93993	0	0
50-50	en	ours90	glove.avg	default	750	surface	4	0.398	0.44176	0.28746	0.74725	0.75985	0.8	0.93052	0	1	xours86	0.37596	0.42992	0.27965	0.75556	0.76424	0.8	0.93137	0	0
50-50	en	ours90	glove.avg	default	750	surface	8	0.42187	0.47241	0.30646	0.75862	0.77883	0.86667	0.93772	0	1	xours86	0.40144	0.46231	0.29827	0.76744	0.7837	0.86667	0.93868	0	0
50-50	en	ours90	glove.avg	default	750	surface@stoppy	1	0.34621	0.34696	0.23615	0.70149	0.72316	0.76667	0.92032	0	4	xours86	0.35315	0.35014	0.23637	0.71318	0.73221	0.76667	0.92236	0	0
50-50	en	ours90	glove.avg	default	750	surface@stoppy	4	0.36624	0.39488	0.25966	0.72289	0.76695	0.83333	0.93717	0	4	xours86	0.37358	0.39703	0.26102	0.73171	0.77475	0.83333	0.93888	0	0
50-50	en	ours90	glove.avg	default	750	surface@stoppy	8	0.35754	0.40195	0.26467	0.7033	0.74519	0.83333	0.92741	0	4	xours86	0.3647	0.40111	0.26267	0.71698	0.75322	0.83333	0.92916	0	0
50-50	en	ours90	glove.avg	default	500	lemma	1	0.41901	0.46466	0.31096	0.74	0.78105	0.8	0.94725	0	0	xours86	0.39674	0.45662	0.3054	0.74227	0.78429	0.83333	0.94781	0	0
50-50	en	ours90	glove.avg	default	500	lemma	4	0.48205	0.50271	0.34346	0.7551	0.78555	0.83333	0.94203	0	0	xours86	0.46299	0.48751	0.33005	0.75789	0.7862	0.83333	0.94205	0	0
50-50	en	ours90	glove.avg	default	500	lemma	8	0.48321	0.49907	0.34146	0.7451	0.78515	0.86667	0.94704	0	0	xours86	0.46715	0.48742	0.33114	0.74747	0.78911	0.86667	0.94791	0	0
50-50	en	ours90	glove.avg	default	500	lemmapos	1	0.41866	0.45122	0.28546	0.72727	0.78594	0.83333	0.94954	0	0	xours86	0.39447	0.44161	0.27691	0.72917	0.785	0.83333	0.94808	0	0
50-50	en	ours90	glove.avg	default	500	lemmapos	4	0.50655	0.51826	0.34596	0.75	0.80895	0.8	0.95498	0	0	xours86	0.49134	0.51184	0.34045	0.75294	0.81322	0.83333	0.95589	0	0
50-50	en	ours90	glove.avg	default	500	lemmapos	8	0.52379	0.53065	0.35596	0.76404	0.80844	0.83333	0.9546	0	0	xours86	0.50692	0.51845	0.34703	0.76744	0.80925	0.83333	0.95473	0	0
50-50	en	ours90	glove.avg	default	500	surface	1	0.40976	0.4356	0.28796	0.75248	0.76398	0.8	0.93594	0	1	xours86	0.39082	0.42062	0.27527	0.7551	0.76752	0.8	0.93666	0	0
50-50	en	ours90	glove.avg	default	500	surface	4	0.40064	0.44808	0.29046	0.72727	0.75998	0.83333	0.9298	0	1	xours86	0.37972	0.43691	0.28239	0.73563	0.76437	0.83333	0.93063	0	0
50-50	en	ours90	glove.avg	default	500	surface	8	0.4156	0.46602	0.30246	0.74157	0.76223	0.86667	0.927	0	1	xours86	0.39421	0.45644	0.29499	0.75	0.76705	0.86667	0.92788	0	0
50-50	en	ours90	glove.avg	default	500	surface@stoppy	1	0.37275	0.37213	0.25166	0.69697	0.73547	0.76667	0.92404	0	4	xours86	0.38022	0.3741	0.25007	0.70866	0.74362	0.76667	0.92583	0	0
50-50	en	ours90	glove.avg	default	500	surface@stoppy	4	0.3717	0.40721	0.26917	0.72165	0.76379	0.83333	0.93147	0	4	xours86	0.37914	0.41211	0.27253	0.73913	0.77298	0.83333	0.93344	0	0
50-50	en	ours90	glove.avg	default	500	surface@stoppy	8	0.3611	0.39666	0.25616	0.69725	0.73315	0.83333	0.88733	0	4	xours86	0.36833	0.39944	0.25555	0.71154	0.74179	0.83333	0.88874	0	0
50-50	en	ours90	glove.run1	default	250	lemma	1	0.39485	0.42589	0.27947	0.72549	0.75486	0.8	0.9362	0	0	xours86	0.36806	0.41284	0.27088	0.72727	0.75547	0.8	0.9361	0	0
50-50	en	ours90	glove.run1	default	250	lemma	4	0.47548	0.48383	0.32925	0.73118	0.77879	0.83333	0.94165	0	0	xours86	0.45838	0.47018	0.31667	0.73333	0.78197	0.83333	0.94228	0	0
50-50	en	ours90	glove.run1	default	250	lemma	8	0.49699	0.51064	0.35046	0.74468	0.7902	0.86667	0.94757	0	0	xours86	0.48115	0.49683	0.33772	0.74725	0.79206	0.86667	0.94793	0	0
50-50	en	ours90	glove.run1	default	250	lemmapos	1	0.41077	0.44667	0.29446	0.72941	0.78317	0.8	0.94864	0	0	xours86	0.38542	0.4372	0.28677	0.73171	0.78205	0.8	0.94717	0	0
50-50	en	ours90	glove.run1	default	250	lemmapos	4	0.51191	0.50824	0.34125	0.74227	0.79834	0.8	0.9528	0	0	xours86	0.49722	0.50158	0.33443	0.74468	0.80338	0.83333	0.95398	0	0
50-50	en	ours90	glove.run1	default	250	lemmapos	8	0.51617	0.5185	0.35096	0.76	0.79515	0.83333	0.94996	0	0	xours86	0.49968	0.50495	0.33936	0.76289	0.79556	0.83333	0.94999	0	0
50-50	en	ours90	glove.run1	default	250	surface	1	0.38548	0.40715	0.26547	0.75	0.75041	0.83333	0.92912	0	1	xours86	0.36694	0.39568	0.25609	0.76596	0.75591	0.83333	0.93024	0	0
50-50	en	ours90	glove.run1	default	250	surface	4	0.39552	0.44405	0.28946	0.72941	0.75967	0.83333	0.92809	0	1	xours86	0.37568	0.4369	0.28403	0.7381	0.76507	0.83333	0.92914	0	0
50-50	en	ours90	glove.run1	default	250	surface	8	0.4239	0.47251	0.30296	0.74747	0.77001	0.86667	0.93491	0	1	xours86	0.40532	0.46434	0.29554	0.76289	0.77526	0.86667	0.93596	0	0
50-50	en	ours90	glove.run1	default	250	surface@stoppy	1	0.36001	0.35536	0.23865	0.69697	0.72829	0.76667	0.91949	0	4	xours86	0.36723	0.35924	0.23911	0.70866	0.73673	0.76667	0.92134	0	0
50-50	en	ours90	glove.run1	default	250	surface@stoppy	4	0.38145	0.40654	0.27167	0.70588	0.7691	0.83333	0.93777	0	4	xours86	0.38909	0.41369	0.27527	0.72165	0.77867	0.83333	0.9399	0	0
50-50	en	ours90	glove.run1	default	250	surface@stoppy	8	0.38523	0.43301	0.28018	0.73585	0.76274	0.83333	0.92999	0	4	xours86	0.39295	0.43431	0.2791	0.75248	0.77083	0.83333	0.93169	0	0
50-50	en	ours90	glove.run1	default	750	lemma	1	0.42702	0.47549	0.31746	0.73913	0.78166	0.83333	0.94558	0	0	xours86	0.40318	0.46589	0.31033	0.74157	0.78346	0.83333	0.94585	0	0
50-50	en	ours90	glove.run1	default	750	lemma	4	0.48205	0.50164	0.34046	0.74227	0.79542	0.86667	0.94982	0	0	xours86	0.46404	0.48854	0.3295	0.74468	0.79716	0.86667	0.95014	0	0
50-50	en	ours90	glove.run1	default	750	lemma	8	0.48428	0.50208	0.34275	0.7451	0.78586	0.83333	0.94466	0	0	xours86	0.46507	0.48584	0.33037	0.74747	0.78612	0.83333	0.94463	0	0
50-50	en	ours90	glove.run1	default	750	lemmapos	1	0.42754	0.465	0.29946	0.75	0.7865	0.83333	0.94893	0	0	xours86	0.40262	0.45589	0.2928	0.75269	0.7834	0.8	0.9466	0	0
50-50	en	ours90	glove.run1	default	750	lemmapos	4	0.51331	0.52545	0.35346	0.76471	0.8085	0.83333	0.95511	0	0	xours86	0.49699	0.51574	0.34593	0.76768	0.81016	0.83333	0.9554	0	0
50-50	en	ours90	glove.run1	default	750	lemmapos	8	0.53104	0.5383	0.36445	0.76289	0.81332	0.83333	0.95663	0	0	xours86	0.51412	0.52552	0.35634	0.76596	0.81359	0.8	0.9566	0	0
50-50	en	ours90	glove.run1	default	750	surface	1	0.40118	0.44135	0.29196	0.7451	0.77578	0.83333	0.94359	0	1	xours86	0.38067	0.42753	0.28075	0.74747	0.77934	0.83333	0.94435	0	0
50-50	en	ours90	glove.run1	default	750	surface	4	0.39885	0.43931	0.28496	0.73333	0.7638	0.83333	0.93152	0	1	xours86	0.37667	0.42681	0.27582	0.74157	0.76832	0.83333	0.93239	0	0
50-50	en	ours90	glove.run1	default	750	surface	8	0.41805	0.47642	0.31146	0.75556	0.77341	0.86667	0.932	0	1	xours86	0.39683	0.46811	0.30485	0.76404	0.77851	0.86667	0.93296	0	0
50-50	en	ours90	glove.run1	default	750	surface@stoppy	1	0.35599	0.36507	0.24765	0.69697	0.73377	0.76667	0.92423	0	4	xours86	0.36312	0.36719	0.24678	0.70866	0.742	0.76667	0.92606	0	0
50-50	en	ours90	glove.run1	default	750	surface@stoppy	4	0.36576	0.39781	0.25966	0.7033	0.76758	0.83333	0.94034	0	4	xours86	0.37308	0.40164	0.26212	0.71739	0.77572	0.83333	0.94218	0	0
50-50	en	ours90	glove.run1	default	750	surface@stoppy	8	0.37469	0.41662	0.26445	0.73171	0.78562	0.86667	0.94762	0	4	xours86	0.3822	0.42255	0.26736	0.74074	0.7952	0.86667	0.94981	0	0
50-50	en	ours90	glove.run1	default	500	lemma	1	0.41652	0.45741	0.30146	0.73469	0.7763	0.8	0.94246	0	0	xours86	0.39299	0.44817	0.29608	0.73684	0.77755	0.8	0.94249	0	0
50-50	en	ours90	glove.run1	default	500	lemma	4	0.4819	0.49008	0.33446	0.72549	0.78413	0.83333	0.94187	0	0	xours86	0.46306	0.4752	0.32183	0.72727	0.78553	0.83333	0.94207	0	0
50-50	en	ours90	glove.run1	default	500	lemma	8	0.4921	0.5063	0.34896	0.74725	0.78587	0.86667	0.94524	0	0	xours86	0.47584	0.49375	0.33881	0.75	0.78861	0.86667	0.9458	0	0
50-50	en	ours90	glove.run1	default	500	lemmapos	1	0.42076	0.46636	0.29846	0.73469	0.7945	0.83333	0.9526	0	0	xours86	0.39635	0.45577	0.29006	0.73684	0.79256	0.83333	0.95119	0	0
50-50	en	ours90	glove.run1	default	500	lemmapos	4	0.51397	0.51617	0.34696	0.75248	0.80586	0.8	0.95488	0	0	xours86	0.4982	0.50591	0.33881	0.7551	0.80779	0.8	0.95523	0	0
50-50	en	ours90	glove.run1	default	500	lemmapos	8	0.52992	0.53559	0.36295	0.7551	0.81011	0.83333	0.95543	0	0	xours86	0.51305	0.52236	0.3536	0.75789	0.81025	0.83333	0.95537	0	0
50-50	en	ours90	glove.run1	default	500	surface	1	0.39491	0.42865	0.28146	0.76	0.77034	0.8	0.9406	0	1	xours86	0.37351	0.41316	0.26869	0.76289	0.77347	0.8	0.94125	0	0
50-50	en	ours90	glove.run1	default	500	surface	4	0.39989	0.4455	0.28946	0.72727	0.75946	0.83333	0.92965	0	1	xours86	0.37845	0.43277	0.2802	0.73563	0.76375	0.83333	0.93046	0	0
50-50	en	ours90	glove.run1	default	500	surface	8	0.41271	0.46077	0.29746	0.73913	0.76399	0.86667	0.92763	0	1	xours86	0.39129	0.4503	0.28951	0.74725	0.7686	0.86667	0.92847	0	0
50-50	en	ours90	glove.run1	default	500	surface@stoppy	1	0.35831	0.35268	0.23815	0.69421	0.72882	0.76667	0.92287	0	4	xours86	0.36549	0.36199	0.24295	0.7069	0.73946	0.76667	0.92532	0	0
50-50	en	ours90	glove.run1	default	500	surface@stoppy	4	0.36967	0.40484	0.26617	0.70455	0.76861	0.83333	0.93929	0	4	xours86	0.37708	0.4092	0.26924	0.71739	0.77755	0.83333	0.9413	0	0
50-50	en	ours90	glove.run1	default	500	surface@stoppy	8	0.37079	0.41179	0.26417	0.71429	0.77145	0.83333	0.94178	0	4	xours86	0.37822	0.41621	0.26595	0.72549	0.78041	0.83333	0.94381	0	0
50-50	en	ours90	glove.run2	default	250	lemma	1	0.40736	0.43976	0.28796	0.73913	0.7591	0.8	0.93339	0	0	xours86	0.38206	0.42509	0.27746	0.74157	0.75889	0.8	0.93305	0	0
50-50	en	ours90	glove.run2	default	250	lemma	4	0.47979	0.49549	0.33696	0.72917	0.78479	0.83333	0.94659	0	0	xours86	0.46179	0.48137	0.32402	0.73118	0.7872	0.83333	0.94708	0	0
50-50	en	ours90	glove.run2	default	250	lemma	8	0.48836	0.50298	0.34696	0.73786	0.7804	0.83333	0.94349	0	0	xours86	0.47228	0.49017	0.33552	0.74	0.78349	0.83333	0.94413	0	0
50-50	en	ours90	glove.run2	default	250	lemmapos	1	0.40716	0.4495	0.29146	0.72941	0.78434	0.83333	0.94911	0	0	xours86	0.38247	0.43893	0.28294	0.73171	0.78293	0.86667	0.94759	0	0
50-50	en	ours90	glove.run2	default	250	lemmapos	4	0.49583	0.49141	0.32646	0.73469	0.78799	0.83333	0.94864	0	0	xours86	0.47894	0.48261	0.318	0.73684	0.7916	0.83333	0.94945	0	0
50-50	en	ours90	glove.run2	default	250	lemmapos	8	0.51818	0.52123	0.35425	0.76	0.79506	0.83333	0.94998	0	0	xours86	0.50163	0.50751	0.34297	0.76289	0.79534	0.83333	0.94998	0	0
50-50	en	ours90	glove.run2	default	250	surface	1	0.38719	0.41198	0.26997	0.73469	0.751	0.83333	0.92786	0	1	xours86	0.36944	0.40139	0.26102	0.75	0.7566	0.83333	0.92899	0	0
50-50	en	ours90	glove.run2	default	250	surface	4	0.39775	0.45049	0.29296	0.72941	0.75694	0.86667	0.92687	0	1	xours86	0.37758	0.44168	0.28622	0.7381	0.76189	0.86667	0.92781	0	0
50-50	en	ours90	glove.run2	default	250	surface	8	-0.00083	0.05059	0.0265	0.69767	0.50807	0.53333	0.70349	0	1	xours86	0.00127	0.05662	0.0304	0.704	0.52085	0.56667	0.70707	0	0
50-50	en	ours90	glove.run2	default	250	surface@stoppy	1	0.36466	0.3703	0.24966	0.6963	0.73212	0.8	0.918	0	4	xours86	0.37196	0.38151	0.25445	0.70769	0.74344	0.8	0.92055	0	0
50-50	en	ours90	glove.run2	default	250	surface@stoppy	4	0.39198	0.41808	0.27717	0.71429	0.77316	0.86667	0.93864	0	4	xours86	0.39984	0.42612	0.28129	0.72289	0.783	0.86667	0.94082	0	0
50-50	en	ours90	glove.run2	default	250	surface@stoppy	8	0.37685	0.39169	0.25666	0.69118	0.73318	0.83333	0.91302	0	4	xours86	0.3844	0.39553	0.25719	0.70476	0.74216	0.83333	0.91488	0	0
50-50	en	ours90	glove.run2	default	750	lemma	1	0.42384	0.45653	0.30096	0.73684	0.76828	0.8	0.94117	0	0	xours86	0.39974	0.4456	0.29334	0.73913	0.76695	0.83333	0.93976	0	0
50-50	en	ours90	glove.run2	default	750	lemma	4	0.47488	0.49011	0.33196	0.74747	0.78595	0.83333	0.94463	0	0	xours86	0.45536	0.47302	0.31745	0.75	0.78608	0.83333	0.94456	0	0
50-50	en	ours90	glove.run2	default	750	lemma	8	0.49707	0.51719	0.35546	0.74	0.79667	0.86667	0.94998	0	0	xours86	0.48019	0.50215	0.34265	0.74227	0.79764	0.86667	0.95013	0	0
50-50	en	ours90	glove.run2	default	750	lemmapos	1	0.41498	0.44781	0.28646	0.74	0.78036	0.83333	0.94643	0	0	xours86	0.39166	0.43824	0.27801	0.74227	0.77728	0.8	0.94361	0	0
50-50	en	ours90	glove.run2	default	750	lemmapos	4	0.50873	0.51618	0.34896	0.7551	0.80783	0.8	0.95538	0	0	xours86	0.49251	0.50721	0.3421	0.75789	0.8102	0.8	0.9558	0	0
50-50	en	ours90	glove.run2	default	750	lemmapos	8	0.52613	0.53251	0.35746	0.76289	0.81304	0.83333	0.95662	0	0	xours86	0.50935	0.51947	0.34812	0.76596	0.81242	0.8	0.95631	0	0
50-50	en	ours90	glove.run2	default	750	surface	1	0.40021	0.42886	0.28596	0.7451	0.76842	0.8	0.93934	0	1	xours86	0.37933	0.41271	0.27308	0.74747	0.7713	0.8	0.93993	0	0
50-50	en	ours90	glove.run2	default	750	surface	4	0.398	0.44176	0.28746	0.74725	0.75985	0.8	0.93052	0	1	xours86	0.37596	0.42992	0.27965	0.75556	0.76424	0.8	0.93137	0	0
50-50	en	ours90	glove.run2	default	750	surface	8	0.42187	0.47241	0.30646	0.75862	0.77883	0.86667	0.93772	0	1	xours86	0.40144	0.46231	0.29827	0.76744	0.7837	0.86667	0.93868	0	0
50-50	en	ours90	glove.run2	default	750	surface@stoppy	1	0.34621	0.34696	0.23615	0.70149	0.72316	0.76667	0.92032	0	4	xours86	0.35315	0.35014	0.23637	0.71318	0.73221	0.76667	0.92236	0	0
50-50	en	ours90	glove.run2	default	750	surface@stoppy	4	0.36624	0.39488	0.25966	0.72289	0.76695	0.83333	0.93717	0	4	xours86	0.37358	0.39703	0.26102	0.73171	0.77475	0.83333	0.93888	0	0
50-50	en	ours90	glove.run2	default	750	surface@stoppy	8	0.35754	0.40195	0.26467	0.7033	0.74519	0.83333	0.92741	0	4	xours86	0.3647	0.40111	0.26267	0.71698	0.75322	0.83333	0.92916	0	0
50-50	en	ours90	glove.run2	default	500	lemma	1	0.41901	0.46466	0.31096	0.74	0.78105	0.8	0.94725	0	0	xours86	0.39674	0.45662	0.3054	0.74227	0.78429	0.83333	0.94781	0	0
50-50	en	ours90	glove.run2	default	500	lemma	4	0.48205	0.50271	0.34346	0.7551	0.78555	0.83333	0.94203	0	0	xours86	0.46299	0.48751	0.33005	0.75789	0.7862	0.83333	0.94205	0	0
50-50	en	ours90	glove.run2	default	500	lemma	8	0.48321	0.49907	0.34146	0.7451	0.78515	0.86667	0.94704	0	0	xours86	0.46715	0.48742	0.33114	0.74747	0.78911	0.86667	0.94791	0	0
50-50	en	ours90	glove.run2	default	500	lemmapos	1	0.41866	0.45122	0.28546	0.72727	0.78594	0.83333	0.94954	0	0	xours86	0.39447	0.44161	0.27691	0.72917	0.785	0.83333	0.94808	0	0
50-50	en	ours90	glove.run2	default	500	lemmapos	4	0.50655	0.51826	0.34596	0.75	0.80895	0.8	0.95498	0	0	xours86	0.49134	0.51184	0.34045	0.75294	0.81322	0.83333	0.95589	0	0
50-50	en	ours90	glove.run2	default	500	lemmapos	8	0.52379	0.53065	0.35596	0.76404	0.80844	0.83333	0.9546	0	0	xours86	0.50692	0.51845	0.34703	0.76744	0.80925	0.83333	0.95473	0	0
50-50	en	ours90	glove.run2	default	500	surface	1	0.40976	0.4356	0.28796	0.75248	0.76398	0.8	0.93594	0	1	xours86	0.39082	0.42062	0.27527	0.7551	0.76752	0.8	0.93666	0	0
50-50	en	ours90	glove.run2	default	500	surface	4	0.40064	0.44808	0.29046	0.72727	0.75998	0.83333	0.9298	0	1	xours86	0.37972	0.43691	0.28239	0.73563	0.76437	0.83333	0.93063	0	0
50-50	en	ours90	glove.run2	default	500	surface	8	0.4156	0.46602	0.30246	0.74157	0.76223	0.86667	0.927	0	1	xours86	0.39421	0.45644	0.29499	0.75	0.76705	0.86667	0.92788	0	0
50-50	en	ours90	glove.run2	default	500	surface@stoppy	1	0.37275	0.37213	0.25166	0.69697	0.73547	0.76667	0.92404	0	4	xours86	0.38022	0.3741	0.25007	0.70866	0.74362	0.76667	0.92583	0	0
50-50	en	ours90	glove.run2	default	500	surface@stoppy	4	0.3717	0.40721	0.26917	0.72165	0.76379	0.83333	0.93147	0	4	xours86	0.37914	0.41211	0.27253	0.73913	0.77298	0.83333	0.93344	0	0
50-50	en	ours90	glove.run2	default	500	surface@stoppy	8	0.3611	0.39666	0.25616	0.69725	0.73315	0.83333	0.88733	0	4	xours86	0.36833	0.39944	0.25555	0.71154	0.74179	0.83333	0.88874	0	0
50-50	en	ours90	glove.run3	default	250	lemma	1	0.40064	0.43242	0.28396	0.74	0.77013	0.76667	0.94124	0	0	xours86	0.37695	0.4227	0.27582	0.74227	0.77348	0.8	0.94177	0	0
50-50	en	ours90	glove.run3	default	250	lemma	4	0.47764	0.49004	0.33446	0.72941	0.77933	0.83333	0.9432	0	0	xours86	0.45844	0.47428	0.32128	0.72917	0.78013	0.83333	0.9433	0	0
50-50	en	ours90	glove.run3	default	250	lemma	8	0.48987	0.50425	0.34546	0.73913	0.78258	0.83333	0.94427	0	0	xours86	0.47312	0.49079	0.33388	0.74157	0.7852	0.83333	0.9448	0	0
50-50	en	ours90	glove.run3	default	250	lemmapos	1	0.41388	0.45719	0.29596	0.74419	0.79176	0.8	0.95098	0	0	xours86	0.38929	0.44739	0.28841	0.74699	0.79078	0.83333	0.94959	0	0
50-50	en	ours90	glove.run3	default	250	lemmapos	4	0.50397	0.49747	0.33546	0.74227	0.79162	0.8	0.94971	0	0	xours86	0.4893	0.49002	0.32895	0.74468	0.79641	0.83333	0.95083	0	0
50-50	en	ours90	glove.run3	default	250	lemmapos	8	0.51856	0.52415	0.35246	0.75556	0.79454	0.83333	0.94925	0	0	xours86	0.50284	0.51108	0.34155	0.75862	0.79496	0.83333	0.94929	0	0
50-50	en	ours90	glove.run3	default	250	surface	1	0.3811	0.40228	0.26247	0.73684	0.74581	0.83333	0.92605	0	1	xours86	0.36275	0.39067	0.25281	0.75269	0.7512	0.83333	0.92714	0	0
50-50	en	ours90	glove.run3	default	250	surface	4	0.40354	0.45446	0.29796	0.72727	0.76253	0.86667	0.92981	0	1	xours86	0.38375	0.44642	0.29115	0.74	0.76775	0.86667	0.93082	0	0
50-50	en	ours90	glove.run3	default	250	surface	8	0.43181	0.47902	0.31096	0.76289	0.76945	0.86667	0.93068	0	1	xours86	0.41296	0.47027	0.30375	0.77895	0.77433	0.86667	0.93159	0	0
50-50	en	ours90	glove.run3	default	250	surface@stoppy	1	0.36485	0.37242	0.25516	0.704	0.73206	0.83333	0.91783	0	4	xours86	0.37216	0.38213	0.26048	0.71667	0.74245	0.83333	0.92013	0	0
50-50	en	ours90	glove.run3	default	250	surface@stoppy	4	0.39454	0.42589	0.28068	0.71429	0.77911	0.83333	0.94399	0	4	xours86	0.40244	0.43147	0.28294	0.72527	0.78815	0.83333	0.94602	0	0
50-50	en	ours90	glove.run3	default	250	surface@stoppy	8	0.37392	0.42154	0.27167	0.72289	0.75872	0.83333	0.92805	0	4	xours86	0.38141	0.42408	0.27198	0.73684	0.76689	0.83333	0.92976	0	0
50-50	en	ours90	glove.run3	default	750	lemma	1	0.42608	0.4686	0.31146	0.74	0.77313	0.8	0.94111	0	0	xours86	0.40125	0.45782	0.3043	0.74227	0.77318	0.8	0.94071	0	0
50-50	en	ours90	glove.run3	default	750	lemma	4	0.47689	0.48976	0.32896	0.73267	0.79485	0.86667	0.95089	0	0	xours86	0.45662	0.47359	0.3158	0.73469	0.7955	0.86667	0.95098	0	0
50-50	en	ours90	glove.run3	default	750	lemma	8	0.48485	0.50205	0.34346	0.73913	0.78803	0.83333	0.94631	0	0	xours86	0.4671	0.48776	0.33169	0.74157	0.78949	0.83333	0.94657	0	0
50-50	en	ours90	glove.run3	default	750	lemmapos	1	0.42557	0.45704	0.29346	0.73469	0.78843	0.83333	0.94977	0	0	xours86	0.40168	0.44768	0.28622	0.73684	0.7856	0.8	0.94759	0	0
50-50	en	ours90	glove.run3	default	750	lemmapos	4	0.51224	0.52278	0.35396	0.75248	0.80658	0.8	0.9547	0	0	xours86	0.4962	0.5119	0.34593	0.7551	0.80767	0.8	0.95484	0	0
50-50	en	ours90	glove.run3	default	750	lemmapos	8	0.52496	0.52921	0.35646	0.75789	0.80784	0.8	0.95515	0	0	xours86	0.50802	0.51545	0.34648	0.76087	0.80788	0.8	0.95506	0	0
50-50	en	ours90	glove.run3	default	750	surface	1	0.38992	0.41946	0.28097	0.73786	0.76587	0.8	0.94044	0	1	xours86	0.36895	0.40584	0.27034	0.74	0.76987	0.8	0.94132	0	0
50-50	en	ours90	glove.run3	default	750	surface	4	0.39842	0.43735	0.28196	0.74157	0.7681	0.83333	0.93679	0	1	xours86	0.37691	0.42551	0.27362	0.75	0.77272	0.83333	0.93774	0	0
50-50	en	ours90	glove.run3	default	750	surface	8	0.42177	0.47688	0.30996	0.76404	0.77219	0.86667	0.93232	0	1	xours86	0.40053	0.46709	0.30211	0.77273	0.7768	0.86667	0.93318	0	0
50-50	en	ours90	glove.run3	default	750	surface@stoppy	1	0.34971	0.35204	0.24115	0.6963	0.72625	0.76667	0.92078	0	4	xours86	0.35672	0.3554	0.23966	0.70769	0.73501	0.76667	0.92273	0	0
50-50	en	ours90	glove.run3	default	750	surface@stoppy	4	0.37679	0.40722	0.27067	0.70455	0.76863	0.83333	0.94002	0	4	xours86	0.38433	0.41158	0.27308	0.71264	0.77707	0.83333	0.94192	0	0
50-50	en	ours90	glove.run3	default	750	surface@stoppy	8	0.38375	0.42611	0.26867	0.725	0.7839	0.86667	0.94529	0	4	xours86	0.39144	0.43384	0.27308	0.73418	0.79352	0.86667	0.94746	0	0
50-50	en	ours90	glove.run3	default	500	lemma	1	0.4282	0.46659	0.30796	0.73118	0.77865	0.8	0.94624	0	0	xours86	0.40566	0.45791	0.30101	0.73333	0.78093	0.8	0.94654	0	0
50-50	en	ours90	glove.run3	default	500	lemma	4	0.47785	0.49278	0.33496	0.72941	0.78668	0.86667	0.94459	0	0	xours86	0.45873	0.47713	0.32073	0.72727	0.7877	0.86667	0.94472	0	0
50-50	en	ours90	glove.run3	default	500	lemma	8	0.49036	0.50388	0.34496	0.73333	0.78541	0.83333	0.94616	0	0	xours86	0.47343	0.48963	0.33279	0.73563	0.78741	0.83333	0.94656	0	0
50-50	en	ours90	glove.run3	default	500	lemmapos	1	0.41689	0.44735	0.28746	0.72917	0.78676	0.8	0.95091	0	0	xours86	0.39321	0.43745	0.2791	0.73118	0.78604	0.83333	0.94988	0	0
50-50	en	ours90	glove.run3	default	500	lemmapos	4	0.51308	0.52375	0.35446	0.7451	0.81054	0.83333	0.95624	0	0	xours86	0.49729	0.51476	0.34812	0.74747	0.8132	0.83333	0.95678	0	0
50-50	en	ours90	glove.run3	default	500	lemmapos	8	0.52862	0.534	0.35896	0.76289	0.81046	0.83333	0.95574	0	0	xours86	0.51166	0.52216	0.35141	0.76596	0.81129	0.83333	0.95589	0	0
50-50	en	ours90	glove.run3	default	500	surface	1	0.40799	0.43697	0.28896	0.7551	0.76386	0.8	0.93606	0	1	xours86	0.38836	0.42298	0.27746	0.75789	0.76734	0.8	0.93677	0	0
50-50	en	ours90	glove.run3	default	500	surface	4	0.40381	0.45213	0.29496	0.74725	0.76318	0.83333	0.9341	0	1	xours86	0.38377	0.44045	0.28568	0.75556	0.76765	0.83333	0.93499	0	0
50-50	en	ours90	glove.run3	default	500	surface	8	0.41686	0.47058	0.30796	0.75	0.77449	0.86667	0.93763	0	1	xours86	0.39578	0.46051	0.29992	0.76596	0.77918	0.86667	0.93856	0	0
50-50	en	ours90	glove.run3	default	500	surface@stoppy	1	0.36046	0.35132	0.23615	0.6963	0.7292	0.73333	0.92319	0	4	xours86	0.36768	0.35906	0.24076	0.70769	0.73904	0.73333	0.92544	0	0
50-50	en	ours90	glove.run3	default	500	surface@stoppy	4	0.35385	0.3843	0.25066	0.70455	0.76284	0.8	0.93898	0	4	xours86	0.36093	0.38737	0.25226	0.71264	0.77141	0.8	0.94094	0	0
50-50	en	ours90	glove.run3	default	500	surface@stoppy	8	0.37408	0.4229	0.27017	0.72289	0.7734	0.86667	0.94081	0	4	xours86	0.38157	0.42802	0.27253	0.73171	0.78237	0.86667	0.94281	0	0

## Sheet: en-ours
weight	language	dataset	model	submodel	dimensions	lemmatype	window	pearson	spearman	kendall	bf1	avgprec	prec@	ndcg	misssingle	misscompound	dataset	pearson	spearman	kendall	bf1	avgprec	prec@	ndcg	misssingle	misscompound
50-50	en	ours	word2vec.avg	cbow	250	lemma	1	0.674567	0.668747	0.469373	0.82358	0.88165	0.894443	0.97675	0	0	xours175	0.672633	0.669497	0.469607	0.82622	0.883073	0.894443	0.97701	0	0
50-50	en	ours	word2vec.avg	cbow	250	lemma	4	0.67741	0.679553	0.478363	0.814543	0.879963	0.9	0.976083	0	0	xours175	0.677627	0.681523	0.479643	0.818823	0.88296	0.9	0.97666	0	0
50-50	en	ours	word2vec.avg	cbow	250	lemma	8	0.68227	0.687323	0.486177	0.808433	0.878727	0.91667	0.97576	0	0	xours175	0.682433	0.68925	0.487053	0.810713	0.881957	0.91667	0.976383	0	0
50-50	en	ours	word2vec.avg	cbow	250	lemmapos	1	0.67787	0.67586	0.47259	0.804417	0.886207	0.911113	0.97874	3	0	xours175	0.68241	0.683557	0.479103	0.80821	0.889767	0.91667	0.979423	3	0
50-50	en	ours	word2vec.avg	cbow	250	lemmapos	4	0.683503	0.694337	0.49017	0.815557	0.889723	0.905557	0.979253	3	0	xours175	0.686073	0.698783	0.493667	0.818077	0.892407	0.905557	0.97977	3	0
50-50	en	ours	word2vec.avg	cbow	250	lemmapos	8	0.681157	0.690823	0.488357	0.81647	0.885383	0.888887	0.978147	3	0	xours175	0.683787	0.695203	0.491663	0.818817	0.888693	0.888887	0.978787	3	0
50-50	en	ours	word2vec.avg	cbow	250	surface	1	0.694043	0.70538	0.502553	0.824803	0.877993	0.888887	0.974653	0	1	xours175	0.691243	0.70391	0.501247	0.83185	0.87983	0.888887	0.97499	0	0
50-50	en	ours	word2vec.avg	cbow	250	surface	4	0.685453	0.693593	0.489487	0.826017	0.87787	0.88333	0.975657	0	1	xours175	0.681483	0.691583	0.48782	0.8271	0.87816	0.877777	0.975693	0	0
50-50	en	ours	word2vec.avg	cbow	250	surface	8	0.676417	0.68168	0.478403	0.806113	0.871967	0.9	0.97449	0	1	xours175	0.673533	0.680013	0.476797	0.805377	0.87293	0.894443	0.97467	0	0
50-50	en	ours	word2vec.avg	cbow	250	surface@stoppy	1	0.68678	0.69532	0.488563	0.819603	0.876247	0.883333	0.97416	0	1	xours175	0.685047	0.69625	0.490347	0.819077	0.876917	0.883333	0.97423	0	0
50-50	en	ours	word2vec.avg	cbow	250	surface@stoppy	4	0.684857	0.69586	0.492403	0.815203	0.876987	0.888887	0.974853	0	1	xours175	0.68139	0.693373	0.490203	0.813067	0.87681	0.888887	0.9748	0	0
50-50	en	ours	word2vec.avg	cbow	250	surface@stoppy	8	0.68538	0.698817	0.494587	0.809883	0.879977	0.905557	0.976083	0	1	xours175	0.682143	0.696903	0.493033	0.81119	0.88039	0.9	0.976147	0	0
50-50	en	ours	word2vec.avg	cbow	750	lemma	1	0.705303	0.702803	0.499737	0.813763	0.897013	0.911113	0.98079	0	0	xours175	0.70441	0.7067	0.5034	0.81648	0.899347	0.905557	0.981217	0	0
50-50	en	ours	word2vec.avg	cbow	750	lemma	4	0.72256	0.72537	0.521053	0.827353	0.89823	0.916667	0.980413	0	0	xours175	0.72132	0.72589	0.52091	0.830063	0.9005	0.916667	0.980837	0	0
50-50	en	ours	word2vec.avg	cbow	750	lemma	8	0.716783	0.718023	0.515893	0.823207	0.893113	0.91667	0.97956	0	0	xours175	0.716647	0.71979	0.516633	0.825713	0.89671	0.91667	0.980237	0	0
50-50	en	ours	word2vec.avg	cbow	750	lemmapos	1	0.70644	0.694563	0.490667	0.824937	0.896653	0.916667	0.980767	3	0	xours175	0.710547	0.703483	0.498667	0.82776	0.900827	0.92222	0.981557	3	0
50-50	en	ours	word2vec.avg	cbow	750	lemmapos	4	0.715523	0.709113	0.503797	0.82585	0.8996	0.911113	0.981267	3	0	xours175	0.716013	0.712453	0.505763	0.828473	0.901847	0.911113	0.981703	3	0
50-50	en	ours	word2vec.avg	cbow	750	lemmapos	8	0.7164	0.709767	0.507357	0.83798	0.898533	0.905557	0.980927	3	0	xours175	0.718693	0.71497	0.51111	0.843957	0.90205	0.905557	0.981597	3	0
50-50	en	ours	word2vec.avg	cbow	750	surface	1	0.71373	0.72631	0.52213	0.837523	0.89207	0.91667	0.978207	0	1	xours175	0.711467	0.72726	0.523057	0.845	0.89432	0.9	0.978603	0	0
50-50	en	ours	word2vec.avg	cbow	750	surface	4	0.70669	0.716007	0.510613	0.830147	0.892523	0.91667	0.97901	0	1	xours175	0.70351	0.715043	0.509163	0.832823	0.89391	0.91667	0.979263	0	0
50-50	en	ours	word2vec.avg	cbow	750	surface	8	0.703617	0.71102	0.50519	0.82702	0.887253	0.905557	0.97812	0	1	xours175	0.701687	0.710167	0.504037	0.82817	0.88907	0.905557	0.978463	0	0
50-50	en	ours	word2vec.avg	cbow	750	surface@stoppy	1	0.71274	0.73014	0.523347	0.831887	0.899413	0.93333	0.98083	0	1	xours175	0.710657	0.732423	0.52566	0.836193	0.901173	0.93333	0.98114	0	0
50-50	en	ours	word2vec.avg	cbow	750	surface@stoppy	4	0.7085	0.72389	0.516343	0.82798	0.894223	0.911113	0.97932	0	1	xours175	0.705473	0.723493	0.515537	0.829187	0.89528	0.911113	0.979513	0	0
50-50	en	ours	word2vec.avg	cbow	750	surface@stoppy	8	0.70619	0.719587	0.509867	0.824247	0.893977	0.922223	0.979373	0	1	xours175	0.70377	0.719503	0.50969	0.825907	0.895283	0.922223	0.979623	0	0
50-50	en	ours	word2vec.avg	cbow	500	lemma	1	0.700527	0.693723	0.490287	0.821433	0.89078	0.927777	0.97887	0	0	xours175	0.69876	0.69501	0.491313	0.823977	0.89206	0.927777	0.979107	0	0
50-50	en	ours	word2vec.avg	cbow	500	lemma	4	0.71642	0.71793	0.51176	0.833027	0.897333	0.91667	0.980117	0	0	xours175	0.715383	0.718917	0.512083	0.835887	0.899733	0.91667	0.980567	0	0
50-50	en	ours	word2vec.avg	cbow	500	lemma	8	0.708737	0.709443	0.505823	0.81785	0.891463	0.91667	0.9789	0	0	xours175	0.708227	0.71059	0.505937	0.824017	0.89442	0.91667	0.97946	0	0
50-50	en	ours	word2vec.avg	cbow	500	lemmapos	1	0.699163	0.690483	0.486963	0.822683	0.894753	0.916667	0.980373	3	0	xours175	0.70244	0.69765	0.493343	0.825377	0.897687	0.911113	0.98093	3	0
50-50	en	ours	word2vec.avg	cbow	500	lemmapos	4	0.70869	0.709307	0.50388	0.82504	0.89839	0.92222	0.980967	3	0	xours175	0.709517	0.712203	0.505457	0.82736	0.9006	0.92222	0.981393	3	0
50-50	en	ours	word2vec.avg	cbow	500	lemmapos	8	0.702373	0.6972	0.494767	0.82548	0.894147	0.9	0.980033	3	0	xours175	0.705377	0.70254	0.49849	0.82821	0.898003	0.9	0.98077	3	0
50-50	en	ours	word2vec.avg	cbow	500	surface	1	0.708857	0.72471	0.523057	0.845443	0.887003	0.911113	0.97674	0	1	xours175	0.70699	0.72614	0.52452	0.852967	0.889687	0.905557	0.977223	0	0
50-50	en	ours	word2vec.avg	cbow	500	surface	4	0.704987	0.713147	0.50831	0.826957	0.889127	0.911113	0.977973	0	1	xours175	0.701393	0.711503	0.506157	0.829627	0.890113	0.911113	0.978153	0	0
50-50	en	ours	word2vec.avg	cbow	500	surface	8	0.696923	0.705763	0.501103	0.825763	0.882053	0.905557	0.976413	0	1	xours175	0.694753	0.704253	0.499497	0.828223	0.883633	0.905557	0.976713	0	0
50-50	en	ours	word2vec.avg	cbow	500	surface@stoppy	1	0.709243	0.720243	0.513153	0.81656	0.89371	0.911113	0.979773	0	1	xours175	0.707913	0.722427	0.51558	0.82057	0.89519	0.905557	0.980007	0	0
50-50	en	ours	word2vec.avg	cbow	500	surface@stoppy	4	0.7042	0.716557	0.511223	0.82375	0.88751	0.911113	0.977387	0	1	xours175	0.701227	0.71492	0.50963	0.82321	0.887973	0.9	0.977463	0	0
50-50	en	ours	word2vec.avg	cbow	500	surface@stoppy	8	0.701143	0.712963	0.50603	0.825837	0.88592	0.911113	0.977187	0	1	xours175	0.698077	0.7122	0.505853	0.82543	0.88683	0.911113	0.977357	0	0
50-50	en	ours	word2vec.avg	skipgram	250	lemma	1	0.668417	0.661987	0.461653	0.81991	0.87931	0.905557	0.976423	0	0	xours175	0.66672	0.663957	0.462977	0.82251	0.881087	0.9	0.976753	0	0
50-50	en	ours	word2vec.avg	skipgram	250	lemma	4	0.682007	0.687133	0.485807	0.81753	0.882657	0.9	0.97682	0	0	xours175	0.6816	0.688177	0.486027	0.820047	0.885183	0.9	0.977303	0	0
50-50	en	ours	word2vec.avg	skipgram	250	lemma	8	0.679823	0.683927	0.483377	0.804203	0.87776	0.905557	0.97563	0	0	xours175	0.680397	0.686007	0.484157	0.807283	0.881067	0.905557	0.976263	0	0
50-50	en	ours	word2vec.avg	skipgram	250	lemmapos	1	0.6789	0.676113	0.47248	0.80942	0.88707	0.905557	0.978923	3	0	xours175	0.683337	0.68385	0.478943	0.814717	0.89069	0.905557	0.97962	3	0
50-50	en	ours	word2vec.avg	skipgram	250	lemmapos	4	0.682687	0.69441	0.491353	0.81815	0.890003	0.905557	0.979373	3	0	xours175	0.68528	0.69901	0.495097	0.82078	0.892953	0.905557	0.979943	3	0
50-50	en	ours	word2vec.avg	skipgram	250	lemmapos	8	0.679347	0.68975	0.488703	0.814717	0.88714	0.894443	0.978657	3	0	xours175	0.682743	0.694723	0.492467	0.81851	0.890947	0.894443	0.979397	3	0
50-50	en	ours	word2vec.avg	skipgram	250	surface	1	0.696973	0.709253	0.506983	0.827167	0.87937	0.894443	0.975103	0	1	xours175	0.694323	0.707867	0.505063	0.834167	0.88113	0.883333	0.97542	0	0
50-50	en	ours	word2vec.avg	skipgram	250	surface	4	0.682577	0.692207	0.48924	0.82199	0.875013	0.9	0.974997	0	1	xours175	0.678117	0.689997	0.486947	0.824603	0.875563	0.9	0.975083	0	0
50-50	en	ours	word2vec.avg	skipgram	250	surface	8	0.676533	0.682827	0.478487	0.813013	0.87077	0.888887	0.97408	0	1	xours175	0.67379	0.681187	0.47684	0.813923	0.8719	0.888887	0.974297	0	0
50-50	en	ours	word2vec.avg	skipgram	250	surface@stoppy	1	0.689133	0.699853	0.49294	0.813187	0.87752	0.9	0.974097	0	1	xours175	0.687237	0.70117	0.495067	0.816037	0.87853	0.9	0.974237	0	0
50-50	en	ours	word2vec.avg	skipgram	250	surface@stoppy	4	0.68683	0.698063	0.494973	0.812207	0.876597	0.894443	0.9748	0	1	xours175	0.683553	0.69587	0.49327	0.811543	0.87655	0.88333	0.97477	0	0
50-50	en	ours	word2vec.avg	skipgram	250	surface@stoppy	8	0.685617	0.69832	0.494997	0.805877	0.878497	0.911113	0.975593	0	1	xours175	0.681707	0.696333	0.493563	0.806563	0.87877	0.905557	0.975627	0	0
50-50	en	ours	word2vec.avg	skipgram	750	lemma	1	0.70293	0.700217	0.495843	0.81727	0.89564	0.911113	0.980467	0	0	xours175	0.702363	0.704907	0.500287	0.82184	0.897793	0.911113	0.980863	0	0
50-50	en	ours	word2vec.avg	skipgram	750	lemma	4	0.722923	0.725993	0.522237	0.828277	0.897633	0.911113	0.980137	0	0	xours175	0.721307	0.726203	0.521373	0.83286	0.89983	0.911113	0.98055	0	0
50-50	en	ours	word2vec.avg	skipgram	750	lemma	8	0.716927	0.715817	0.512893	0.823597	0.89311	0.91667	0.97935	0	0	xours175	0.71648	0.717507	0.513503	0.826157	0.896013	0.91667	0.979903	0	0
50-50	en	ours	word2vec.avg	skipgram	750	lemmapos	1	0.703053	0.69084	0.486533	0.823287	0.898993	0.927777	0.981283	3	0	xours175	0.707487	0.70015	0.494467	0.830747	0.90312	0.927777	0.982063	3	0
50-50	en	ours	word2vec.avg	skipgram	750	lemmapos	4	0.718217	0.712013	0.506403	0.832253	0.901973	0.927777	0.981733	3	0	xours175	0.719603	0.716727	0.50971	0.83496	0.905073	0.927777	0.982327	3	0
50-50	en	ours	word2vec.avg	skipgram	750	lemmapos	8	0.71579	0.709227	0.50425	0.839343	0.900443	0.905557	0.981317	3	0	xours175	0.71729	0.713813	0.507647	0.84676	0.903703	0.905557	0.981937	3	0
50-50	en	ours	word2vec.avg	skipgram	750	surface	1	0.713767	0.72516	0.520017	0.843963	0.89011	0.905557	0.97774	0	1	xours175	0.712193	0.7273	0.52174	0.851707	0.893347	0.905557	0.978323	0	0
50-50	en	ours	word2vec.avg	skipgram	750	surface	4	0.706887	0.717887	0.512537	0.83184	0.894223	0.911113	0.979383	0	1	xours175	0.704233	0.717527	0.51124	0.83457	0.895973	0.911113	0.97971	0	0
50-50	en	ours	word2vec.avg	skipgram	750	surface	8	0.702427	0.709837	0.504707	0.82246	0.88419	0.9	0.977123	0	1	xours175	0.700253	0.709417	0.50423	0.824243	0.886117	0.9	0.977487	0	0
50-50	en	ours	word2vec.avg	skipgram	750	surface@stoppy	1	0.716393	0.731247	0.525073	0.84555	0.90193	0.927777	0.981277	0	1	xours175	0.714347	0.733257	0.526697	0.8486	0.903377	0.922223	0.98153	0	0
50-50	en	ours	word2vec.avg	skipgram	750	surface@stoppy	4	0.713907	0.72913	0.521527	0.837283	0.897887	0.916667	0.980087	0	1	xours175	0.710717	0.72848	0.52106	0.83794	0.8985	0.911113	0.980193	0	0
50-50	en	ours	word2vec.avg	skipgram	750	surface@stoppy	8	0.704287	0.720363	0.513033	0.82562	0.892443	0.911113	0.97915	0	1	xours175	0.702067	0.720843	0.51383	0.829823	0.894053	0.911113	0.979443	0	0
50-50	en	ours	word2vec.avg	skipgram	500	lemma	1	0.694173	0.68271	0.4813	0.81066	0.88861	0.911113	0.978657	0	0	xours175	0.692373	0.684717	0.4828	0.81316	0.889807	0.905557	0.97887	0	0
50-50	en	ours	word2vec.avg	skipgram	500	lemma	4	0.7117	0.715453	0.509623	0.834893	0.895873	0.911113	0.9798	0	0	xours175	0.711537	0.717707	0.511357	0.837753	0.8989	0.911113	0.98037	0	0
50-50	en	ours	word2vec.avg	skipgram	500	lemma	8	0.707717	0.70921	0.506387	0.81498	0.889363	0.91667	0.978323	0	0	xours175	0.708003	0.711667	0.507983	0.822043	0.892697	0.91667	0.978957	0	0
50-50	en	ours	word2vec.avg	skipgram	500	lemmapos	1	0.696603	0.687253	0.483193	0.8185	0.892823	0.916667	0.979933	3	0	xours175	0.700303	0.69459	0.489797	0.820997	0.895737	0.905557	0.98049	3	0
50-50	en	ours	word2vec.avg	skipgram	500	lemmapos	4	0.71211	0.710163	0.505933	0.832687	0.899567	0.922223	0.981223	3	0	xours175	0.713237	0.713567	0.508113	0.835513	0.901997	0.922223	0.98169	3	0
50-50	en	ours	word2vec.avg	skipgram	500	lemmapos	8	0.704963	0.700393	0.497237	0.83143	0.893897	0.9	0.9799	3	0	xours175	0.70706	0.705073	0.50049	0.836437	0.897227	0.9	0.980543	3	0
50-50	en	ours	word2vec.avg	skipgram	500	surface	1	0.707237	0.722383	0.522503	0.84024	0.88214	0.911113	0.975343	0	1	xours175	0.705277	0.72285	0.522927	0.8473	0.88434	0.9	0.97574	0	0
50-50	en	ours	word2vec.avg	skipgram	500	surface	4	0.700953	0.712613	0.507023	0.82918	0.888373	0.91667	0.97766	0	1	xours175	0.697983	0.71137	0.505367	0.833913	0.889747	0.911113	0.977917	0	0
50-50	en	ours	word2vec.avg	skipgram	500	surface	8	0.698957	0.706527	0.501957	0.829183	0.881857	0.911113	0.97645	0	1	xours175	0.696583	0.704957	0.500443	0.830777	0.883153	0.911113	0.976693	0	0
50-50	en	ours	word2vec.avg	skipgram	500	surface@stoppy	1	0.70743	0.71565	0.50763	0.82154	0.895677	0.922223	0.9801	0	1	xours175	0.705603	0.71722	0.509297	0.824157	0.896707	0.922223	0.980263	0	0
50-50	en	ours	word2vec.avg	skipgram	500	surface@stoppy	4	0.704467	0.7166	0.511707	0.827963	0.889417	0.905557	0.977737	0	1	xours175	0.701307	0.715683	0.510847	0.830753	0.89016	0.905557	0.977863	0	0
50-50	en	ours	word2vec.avg	skipgram	500	surface@stoppy	8	0.701753	0.71544	0.508213	0.82587	0.88857	0.905557	0.978053	0	1	xours175	0.699043	0.71504	0.50829	0.826073	0.88987	0.9	0.978293	0	0
50-50	en	ours	word2vec.run1	cbow	250	lemma	1	0.67795	0.67443	0.47687	0.82286	0.88396	0.9	0.9774	0	0	xours175	0.67607	0.67463	0.47679	0.82558	0.88469	0.9	0.97753	0	0
50-50	en	ours	word2vec.run1	cbow	250	lemma	4	0.67631	0.6765	0.47687	0.80874	0.88	0.9	0.97612	0	0	xours175	0.67753	0.67994	0.47903	0.81657	0.88393	0.9	0.97687	0	0
50-50	en	ours	word2vec.run1	cbow	250	lemma	8	0.68103	0.68671	0.4849	0.81081	0.87935	0.91667	0.97601	0	0	xours175	0.68183	0.68938	0.48679	0.81319	0.88251	0.91667	0.97662	0	0
50-50	en	ours	word2vec.run1	cbow	250	lemmapos	1	0.67722	0.67688	0.47401	0.80214	0.88636	0.9	0.97882	3	0	xours175	0.68255	0.68521	0.48074	0.80874	0.89048	0.91667	0.97962	3	0
50-50	en	ours	word2vec.run1	cbow	250	lemmapos	4	0.68495	0.69589	0.49216	0.81564	0.88966	0.9	0.97927	3	0	xours175	0.68715	0.69985	0.49546	0.81818	0.89225	0.9	0.97977	3	0
50-50	en	ours	word2vec.run1	cbow	250	lemmapos	8	0.67963	0.68944	0.48851	0.81443	0.88302	0.88333	0.97773	3	0	xours175	0.68283	0.69437	0.49226	0.81675	0.88684	0.88333	0.97847	3	0
50-50	en	ours	word2vec.run1	cbow	250	surface	1	0.69436	0.70839	0.5062	0.82796	0.87633	0.88333	0.97375	0	1	xours175	0.69211	0.70695	0.50506	0.83516	0.8784	0.88333	0.97413	0	0
50-50	en	ours	word2vec.run1	cbow	250	surface	4	0.68197	0.68946	0.48515	0.82558	0.8749	0.88333	0.97487	0	1	xours175	0.6786	0.68763	0.48384	0.82353	0.87526	0.88333	0.97491	0	0
50-50	en	ours	word2vec.run1	cbow	250	surface	8	0.67599	0.6792	0.476	0.8	0.86916	0.9	0.97384	0	1	xours175	0.67269	0.6767	0.47377	0.79769	0.87024	0.9	0.97404	0	0
50-50	en	ours	word2vec.run1	cbow	250	surface@stoppy	1	0.68978	0.69737	0.48896	0.81657	0.87559	0.9	0.97296	0	1	xours175	0.68768	0.69841	0.49089	0.81437	0.87596	0.9	0.97295	0	0
50-50	en	ours	word2vec.run1	cbow	250	surface@stoppy	4	0.68241	0.69459	0.49203	0.80925	0.87544	0.88333	0.97457	0	1	xours175	0.67839	0.69171	0.48928	0.80702	0.87525	0.88333	0.97451	0	0
50-50	en	ours	word2vec.run1	cbow	250	surface@stoppy	8	0.68617	0.70146	0.49671	0.80447	0.88055	0.9	0.97617	0	1	xours175	0.68253	0.69959	0.49528	0.80682	0.88078	0.9	0.97619	0	0
50-50	en	ours	word2vec.run1	cbow	750	lemma	1	0.69676	0.69447	0.49352	0.80851	0.89273	0.91667	0.97996	0	0	xours175	0.69622	0.69863	0.49757	0.81159	0.89524	0.91667	0.98042	0	0
50-50	en	ours	word2vec.run1	cbow	750	lemma	4	0.7151	0.71464	0.51212	0.82105	0.89466	0.9	0.97969	0	0	xours175	0.71405	0.71541	0.51264	0.82353	0.89666	0.9	0.98006	0	0
50-50	en	ours	word2vec.run1	cbow	750	lemma	8	0.72195	0.72213	0.51987	0.81443	0.89399	0.91667	0.97985	0	0	xours175	0.72167	0.72366	0.52018	0.81675	0.89738	0.91667	0.98049	0	0
50-50	en	ours	word2vec.run1	cbow	750	lemmapos	1	0.69884	0.68616	0.4847	0.81871	0.89352	0.93333	0.98014	3	0	xours175	0.70345	0.69577	0.49297	0.82143	0.8981	0.93333	0.98102	3	0
50-50	en	ours	word2vec.run1	cbow	750	lemmapos	4	0.71574	0.70938	0.50421	0.82723	0.90103	0.91667	0.98159	3	0	xours175	0.71602	0.71311	0.50625	0.82979	0.90352	0.91667	0.98207	3	0
50-50	en	ours	word2vec.run1	cbow	750	lemmapos	8	0.71591	0.70766	0.50657	0.83333	0.89691	0.91667	0.9806	3	0	xours175	0.71814	0.71255	0.50993	0.8427	0.90105	0.91667	0.98139	3	0
50-50	en	ours	word2vec.run1	cbow	750	surface	1	0.71238	0.723	0.51788	0.8377	0.89469	0.91667	0.97862	0	1	xours175	0.71026	0.72378	0.5186	0.84492	0.8967	0.9	0.97896	0	0
50-50	en	ours	word2vec.run1	cbow	750	surface	4	0.70485	0.71306	0.50913	0.82105	0.89116	0.91667	0.97874	0	1	xours175	0.70139	0.71174	0.50738	0.82353	0.89245	0.91667	0.97897	0	0
50-50	en	ours	word2vec.run1	cbow	750	surface	8	0.7057	0.71095	0.50421	0.82955	0.88713	0.9	0.97816	0	1	xours175	0.70368	0.71039	0.50362	0.83237	0.88909	0.9	0.97853	0	0
50-50	en	ours	word2vec.run1	cbow	750	surface@stoppy	1	0.71308	0.73012	0.52384	0.8254	0.89702	0.93333	0.98036	0	1	xours175	0.71121	0.73211	0.5257	0.82796	0.89849	0.93333	0.98062	0	0
50-50	en	ours	word2vec.run1	cbow	750	surface@stoppy	4	0.70928	0.72552	0.51862	0.82143	0.89569	0.91667	0.97979	0	1	xours175	0.70592	0.7248	0.51742	0.82424	0.89634	0.91667	0.9799	0	0
50-50	en	ours	word2vec.run1	cbow	750	surface@stoppy	8	0.70675	0.71785	0.50719	0.82081	0.89297	0.91667	0.97916	0	1	xours175	0.70426	0.71834	0.50769	0.82353	0.89458	0.91667	0.97947	0	0
50-50	en	ours	word2vec.run1	cbow	500	lemma	1	0.69899	0.69534	0.49169	0.82126	0.89032	0.93333	0.97873	0	0	xours175	0.6974	0.69681	0.49318	0.82353	0.89152	0.93333	0.97895	0	0
50-50	en	ours	word2vec.run1	cbow	500	lemma	4	0.71507	0.71574	0.51125	0.83616	0.8965	0.91667	0.97989	0	0	xours175	0.71309	0.71621	0.51106	0.83908	0.89861	0.91667	0.98028	0	0
50-50	en	ours	word2vec.run1	cbow	500	lemma	8	0.70864	0.71235	0.50955	0.8172	0.89255	0.91667	0.97926	0	0	xours175	0.70816	0.71334	0.50953	0.82222	0.89529	0.91667	0.97978	0	0
50-50	en	ours	word2vec.run1	cbow	500	lemmapos	1	0.69835	0.69065	0.48714	0.81564	0.89143	0.91667	0.97962	3	0	xours175	0.70166	0.6974	0.49279	0.81818	0.8941	0.91667	0.98012	3	0
50-50	en	ours	word2vec.run1	cbow	500	lemmapos	4	0.71177	0.71122	0.50446	0.82873	0.89924	0.93333	0.98111	3	0	xours175	0.71235	0.71368	0.50546	0.83146	0.90151	0.93333	0.98155	3	0
50-50	en	ours	word2vec.run1	cbow	500	lemmapos	8	0.70366	0.69979	0.49812	0.82418	0.89376	0.9	0.97987	3	0	xours175	0.70722	0.70496	0.50191	0.82682	0.89745	0.9	0.98058	3	0
50-50	en	ours	word2vec.run1	cbow	500	surface	1	0.70212	0.71933	0.51751	0.85106	0.88499	0.9	0.97625	0	1	xours175	0.69972	0.72075	0.51926	0.8587	0.88739	0.9	0.97668	0	0
50-50	en	ours	word2vec.run1	cbow	500	surface	4	0.70706	0.71547	0.51179	0.82873	0.8893	0.9	0.97813	0	1	xours175	0.70352	0.71393	0.50953	0.83146	0.89053	0.9	0.97836	0	0
50-50	en	ours	word2vec.run1	cbow	500	surface	8	0.7009	0.71006	0.5067	0.83146	0.88187	0.9	0.97638	0	1	xours175	0.69818	0.708	0.5044	0.83429	0.88332	0.9	0.97666	0	0
50-50	en	ours	word2vec.run1	cbow	500	surface@stoppy	1	0.70506	0.71662	0.51017	0.81395	0.89226	0.9	0.97945	0	1	xours175	0.70334	0.71869	0.51295	0.81657	0.89361	0.9	0.97965	0	0
50-50	en	ours	word2vec.run1	cbow	500	surface@stoppy	4	0.70248	0.71642	0.51224	0.81437	0.88708	0.9	0.97727	0	1	xours175	0.6992	0.71494	0.51027	0.81212	0.88784	0.9	0.9774	0	0
50-50	en	ours	word2vec.run1	cbow	500	surface@stoppy	8	0.70071	0.70776	0.50023	0.82558	0.88445	0.9	0.97691	0	1	xours175	0.69742	0.70635	0.49928	0.82353	0.88508	0.9	0.97703	0	0
50-50	en	ours	word2vec.run1	skipgram	250	lemma	1	0.66749	0.66098	0.46233	0.82682	0.87957	0.9	0.97638	0	0	xours175	0.66555	0.66198	0.4626	0.82955	0.88151	0.9	0.97674	0	0
50-50	en	ours	word2vec.run1	skipgram	250	lemma	4	0.67399	0.68103	0.48085	0.81319	0.8784	0.9	0.9761	0	0	xours175	0.67425	0.68289	0.48179	0.81564	0.88173	0.9	0.97674	0	0
50-50	en	ours	word2vec.run1	skipgram	250	lemma	8	0.68041	0.68425	0.48545	0.81053	0.87931	0.9	0.97614	0	0	xours175	0.68014	0.6857	0.48521	0.81522	0.88277	0.9	0.9768	0	0
50-50	en	ours	word2vec.run1	skipgram	250	lemmapos	1	0.67394	0.67132	0.46867	0.80214	0.88567	0.91667	0.97869	3	0	xours175	0.67863	0.67904	0.47456	0.80874	0.88916	0.9	0.97935	3	0
50-50	en	ours	word2vec.run1	skipgram	250	lemmapos	4	0.6827	0.69516	0.49203	0.82486	0.89155	0.91667	0.97969	3	0	xours175	0.68473	0.69908	0.4952	0.82759	0.89386	0.91667	0.98014	3	0
50-50	en	ours	word2vec.run1	skipgram	250	lemmapos	8	0.67995	0.68976	0.48893	0.81564	0.88725	0.88333	0.97868	3	0	xours175	0.68373	0.69509	0.4931	0.81818	0.89104	0.88333	0.97942	3	0
50-50	en	ours	word2vec.run1	skipgram	250	surface	1	0.69702	0.71194	0.51104	0.81915	0.87915	0.9	0.97502	0	1	xours175	0.69451	0.71047	0.50901	0.82609	0.88103	0.88333	0.97536	0	0
50-50	en	ours	word2vec.run1	skipgram	250	surface	4	0.68026	0.68905	0.48664	0.82022	0.87287	0.9	0.97445	0	1	xours175	0.67538	0.68644	0.48424	0.82286	0.87299	0.9	0.97444	0	0
50-50	en	ours	word2vec.run1	skipgram	250	surface	8	0.67503	0.67913	0.47414	0.81356	0.86915	0.9	0.97367	0	1	xours175	0.67141	0.67705	0.47246	0.81609	0.87001	0.9	0.97384	0	0
50-50	en	ours	word2vec.run1	skipgram	250	surface@stoppy	1	0.69009	0.6992	0.4924	0.80952	0.87867	0.9	0.9747	0	1	xours175	0.68868	0.70118	0.4952	0.81283	0.87957	0.9	0.9748	0	0
50-50	en	ours	word2vec.run1	skipgram	250	surface@stoppy	4	0.68071	0.69324	0.48917	0.81356	0.87434	0.9	0.97425	0	1	xours175	0.67713	0.69066	0.48744	0.81143	0.87423	0.88333	0.97421	0	0
50-50	en	ours	word2vec.run1	skipgram	250	surface@stoppy	8	0.69011	0.70523	0.50073	0.81143	0.88328	0.91667	0.97672	0	1	xours175	0.68631	0.70291	0.49888	0.81356	0.88321	0.9	0.97669	0	0
50-50	en	ours	word2vec.run1	skipgram	750	lemma	1	0.70918	0.70757	0.50322	0.82022	0.89993	0.9	0.98152	0	0	xours175	0.70938	0.71281	0.50822	0.82474	0.90255	0.9	0.98201	0	0
50-50	en	ours	word2vec.run1	skipgram	750	lemma	4	0.7218	0.72616	0.52367	0.82759	0.897	0.9	0.97997	0	0	xours175	0.71984	0.72588	0.52276	0.83041	0.89851	0.9	0.98026	0	0
50-50	en	ours	word2vec.run1	skipgram	750	lemma	8	0.71681	0.71229	0.50955	0.82796	0.89323	0.91667	0.97944	0	0	xours175	0.7168	0.71421	0.51045	0.8306	0.89648	0.91667	0.98006	0	0
50-50	en	ours	word2vec.run1	skipgram	750	lemmapos	1	0.70592	0.69392	0.48875	0.82486	0.90431	0.93333	0.9824	3	0	xours175	0.70963	0.70211	0.49541	0.83237	0.90761	0.93333	0.98302	3	0
50-50	en	ours	word2vec.run1	skipgram	750	lemmapos	4	0.71951	0.71392	0.50843	0.82902	0.90121	0.93333	0.98156	3	0	xours175	0.72077	0.71857	0.51177	0.83158	0.90429	0.93333	0.98215	3	0
50-50	en	ours	word2vec.run1	skipgram	750	lemmapos	8	0.7143	0.70797	0.50346	0.84571	0.89941	0.9	0.981	3	0	xours175	0.71602	0.71241	0.50664	0.85549	0.90229	0.9	0.98155	3	0
50-50	en	ours	word2vec.run1	skipgram	750	surface	1	0.71651	0.72837	0.52397	0.84946	0.89249	0.91667	0.97836	0	1	xours175	0.71474	0.72979	0.52491	0.85714	0.8956	0.91667	0.97893	0	0
50-50	en	ours	word2vec.run1	skipgram	750	surface	4	0.70712	0.7177	0.51415	0.82796	0.89475	0.91667	0.97978	0	1	xours175	0.70461	0.71759	0.51282	0.8306	0.89683	0.91667	0.98017	0	0
50-50	en	ours	word2vec.run1	skipgram	750	surface	8	0.70254	0.70676	0.50259	0.80723	0.88225	0.88333	0.97699	0	1	xours175	0.70028	0.7066	0.5027	0.80702	0.88418	0.88333	0.97736	0	0
50-50	en	ours	word2vec.run1	skipgram	750	surface@stoppy	1	0.72168	0.74093	0.53585	0.85876	0.90529	0.93333	0.98192	0	1	xours175	0.71944	0.7425	0.53657	0.86207	0.90675	0.93333	0.98217	0	0
50-50	en	ours	word2vec.run1	skipgram	750	surface@stoppy	4	0.71018	0.72469	0.51751	0.83333	0.89292	0.93333	0.97877	0	1	xours175	0.70694	0.72389	0.51703	0.83429	0.89356	0.91667	0.97888	0	0
50-50	en	ours	word2vec.run1	skipgram	750	surface@stoppy	8	0.70389	0.71882	0.5103	0.83041	0.89288	0.91667	0.97924	0	1	xours175	0.70231	0.71977	0.51098	0.83333	0.89518	0.91667	0.97967	0	0
50-50	en	ours	word2vec.run1	skipgram	500	lemma	1	0.69146	0.68271	0.48097	0.81356	0.88885	0.91667	0.97842	0	0	xours175	0.68915	0.68371	0.48192	0.81609	0.88961	0.9	0.97854	0	0
50-50	en	ours	word2vec.run1	skipgram	500	lemma	4	0.71242	0.71781	0.51187	0.84091	0.89759	0.9	0.98023	0	0	xours175	0.71198	0.71974	0.5133	0.84393	0.90079	0.9	0.98083	0	0
50-50	en	ours	word2vec.run1	skipgram	500	lemma	8	0.70701	0.70821	0.50508	0.80682	0.89048	0.91667	0.9788	0	0	xours175	0.70792	0.71083	0.50664	0.81609	0.89414	0.91667	0.9795	0	0
50-50	en	ours	word2vec.run1	skipgram	500	lemmapos	1	0.69986	0.69591	0.49037	0.83721	0.89739	0.93333	0.98072	3	0	xours175	0.70453	0.7031	0.49726	0.83529	0.89983	0.91667	0.9812	3	0
50-50	en	ours	word2vec.run1	skipgram	500	lemmapos	4	0.71395	0.71317	0.50632	0.82955	0.89999	0.93333	0.98128	3	0	xours175	0.71505	0.71648	0.50835	0.83237	0.90251	0.93333	0.98176	3	0
50-50	en	ours	word2vec.run1	skipgram	500	lemmapos	8	0.7047	0.69666	0.49452	0.82873	0.89382	0.9	0.97998	3	0	xours175	0.70603	0.7002	0.49652	0.83146	0.89669	0.9	0.98054	3	0
50-50	en	ours	word2vec.run1	skipgram	500	surface	1	0.70456	0.71877	0.51763	0.8377	0.88129	0.91667	0.97515	0	1	xours175	0.70271	0.71902	0.51755	0.84492	0.88345	0.9	0.97554	0	0
50-50	en	ours	word2vec.run1	skipgram	500	surface	4	0.69954	0.7088	0.50284	0.82979	0.88763	0.91667	0.97736	0	1	xours175	0.69611	0.70704	0.50072	0.83243	0.88869	0.91667	0.97756	0	0
50-50	en	ours	word2vec.run1	skipgram	500	surface	8	0.69908	0.70453	0.49849	0.82955	0.88016	0.9	0.97613	0	1	xours175	0.69735	0.70381	0.49809	0.83237	0.88215	0.9	0.9765	0	0
50-50	en	ours	word2vec.run1	skipgram	500	surface@stoppy	1	0.70979	0.7199	0.51174	0.82759	0.89943	0.91667	0.98101	0	1	xours175	0.70823	0.72192	0.51356	0.83041	0.90057	0.91667	0.98118	0	0
50-50	en	ours	word2vec.run1	skipgram	500	surface@stoppy	4	0.703	0.71426	0.51104	0.81818	0.88624	0.9	0.97709	0	1	xours175	0.70031	0.71325	0.51019	0.82081	0.88697	0.9	0.97722	0	0
50-50	en	ours	word2vec.run1	skipgram	500	surface@stoppy	8	0.70328	0.71744	0.50806	0.8284	0.89064	0.9	0.97821	0	1	xours175	0.70028	0.71626	0.5073	0.8284	0.89153	0.9	0.97837	0	0
50-50	en	ours	word2vec.run2	cbow	250	lemma	1	0.66877	0.66184	0.46159	0.81915	0.8784	0.9	0.97578	0	0	xours175	0.66685	0.66299	0.46194	0.82162	0.88028	0.9	0.97613	0	0
50-50	en	ours	word2vec.run2	cbow	250	lemma	4	0.68173	0.68504	0.48197	0.81967	0.8825	0.9	0.97681	0	0	xours175	0.68125	0.68612	0.48258	0.82222	0.88492	0.9	0.97728	0	0
50-50	en	ours	word2vec.run2	cbow	250	lemma	8	0.68353	0.68725	0.48669	0.81026	0.87877	0.91667	0.97566	0	0	xours175	0.68303	0.68845	0.48666	0.8125	0.88199	0.91667	0.97628	0	0
50-50	en	ours	word2vec.run2	cbow	250	lemmapos	1	0.67726	0.6757	0.47223	0.81111	0.88788	0.91667	0.97901	3	0	xours175	0.68181	0.6837	0.47951	0.81356	0.89132	0.91667	0.97967	3	0
50-50	en	ours	word2vec.run2	cbow	250	lemmapos	4	0.68427	0.69588	0.49166	0.82022	0.89017	0.91667	0.9793	3	0	xours175	0.68642	0.70001	0.49468	0.82286	0.89282	0.91667	0.97981	3	0
50-50	en	ours	word2vec.run2	cbow	250	lemmapos	8	0.68184	0.6903	0.48656	0.81633	0.88561	0.9	0.97806	3	0	xours175	0.68343	0.69411	0.48942	0.81865	0.88853	0.9	0.97862	3	0
50-50	en	ours	word2vec.run2	cbow	250	surface	1	0.69238	0.70491	0.50123	0.8254	0.8779	0.88333	0.97508	0	1	xours175	0.68958	0.70415	0.50059	0.83243	0.88009	0.88333	0.97549	0	0
50-50	en	ours	word2vec.run2	cbow	250	surface	4	0.68294	0.69265	0.48917	0.82955	0.87608	0.88333	0.97531	0	1	xours175	0.67847	0.69044	0.48744	0.83237	0.87648	0.88333	0.97538	0	0
50-50	en	ours	word2vec.run2	cbow	250	surface	8	0.67805	0.68336	0.47923	0.81111	0.87104	0.88333	0.97418	0	1	xours175	0.67481	0.68185	0.47785	0.81356	0.87187	0.88333	0.97433	0	0
50-50	en	ours	word2vec.run2	cbow	250	surface@stoppy	1	0.68965	0.6967	0.49153	0.81871	0.87598	0.88333	0.97452	0	1	xours175	0.6877	0.69758	0.49297	0.82143	0.87685	0.88333	0.97464	0	0
50-50	en	ours	word2vec.run2	cbow	250	surface@stoppy	4	0.68701	0.69664	0.49377	0.81818	0.87612	0.88333	0.97475	0	1	xours175	0.68349	0.69392	0.49165	0.81609	0.87588	0.88333	0.97468	0	0
50-50	en	ours	word2vec.run2	cbow	250	surface@stoppy	8	0.68606	0.69718	0.49402	0.81437	0.87956	0.9	0.976	0	1	xours175	0.68274	0.69454	0.49191	0.81356	0.87961	0.9	0.976	0	0
50-50	en	ours	word2vec.run2	cbow	750	lemma	1	0.70661	0.6992	0.49477	0.80925	0.89526	0.91667	0.98028	0	0	xours175	0.70518	0.703	0.49823	0.81176	0.89719	0.9	0.98064	0	0
50-50	en	ours	word2vec.run2	cbow	750	lemma	4	0.72691	0.73026	0.52484	0.8306	0.90014	0.93333	0.98098	0	0	xours175	0.72513	0.73039	0.5236	0.83333	0.90265	0.93333	0.98145	0	0
50-50	en	ours	word2vec.run2	cbow	750	lemma	8	0.71486	0.71829	0.51726	0.82723	0.89033	0.91667	0.97894	0	0	xours175	0.7146	0.71969	0.51782	0.82979	0.89394	0.91667	0.97962	0	0
50-50	en	ours	word2vec.run2	cbow	750	lemmapos	1	0.70565	0.69316	0.49017	0.82081	0.89622	0.91667	0.98065	3	0	xours175	0.71019	0.70252	0.49836	0.82353	0.90103	0.93333	0.98157	3	0
50-50	en	ours	word2vec.run2	cbow	750	lemmapos	4	0.71795	0.71264	0.50508	0.82474	0.89964	0.91667	0.98139	3	0	xours175	0.71854	0.71621	0.50756	0.82723	0.90156	0.91667	0.98177	3	0
50-50	en	ours	word2vec.run2	cbow	750	lemmapos	8	0.71935	0.71422	0.51191	0.84153	0.90069	0.9	0.98144	3	0	xours175	0.72281	0.72063	0.51689	0.84706	0.90476	0.9	0.98221	3	0
50-50	en	ours	word2vec.run2	cbow	750	surface	1	0.71709	0.73334	0.53299	0.83871	0.89224	0.91667	0.97803	0	1	xours175	0.71478	0.73373	0.53341	0.84615	0.89442	0.9	0.97842	0	0
50-50	en	ours	word2vec.run2	cbow	750	surface	4	0.70326	0.7131	0.5062	0.83243	0.8919	0.91667	0.97897	0	1	xours175	0.70044	0.71244	0.5044	0.83516	0.89366	0.91667	0.9793	0	0
50-50	en	ours	word2vec.run2	cbow	750	surface	8	0.69978	0.7088	0.50367	0.81818	0.88482	0.91667	0.97747	0	1	xours175	0.69827	0.7084	0.5033	0.82081	0.88694	0.91667	0.97787	0	0
50-50	en	ours	word2vec.run2	cbow	750	surface@stoppy	1	0.71632	0.73199	0.52372	0.82873	0.89852	0.93333	0.98073	0	1	xours175	0.71432	0.73449	0.52623	0.83146	0.90022	0.93333	0.98103	0	0
50-50	en	ours	word2vec.run2	cbow	750	surface@stoppy	4	0.70916	0.72302	0.51564	0.83616	0.89415	0.91667	0.97933	0	1	xours175	0.70607	0.72296	0.51492	0.83908	0.89547	0.91667	0.97957	0	0
50-50	en	ours	word2vec.run2	cbow	750	surface@stoppy	8	0.7084	0.72318	0.5139	0.82353	0.89644	0.93333	0.97996	0	1	xours175	0.70646	0.72301	0.51374	0.82286	0.89756	0.93333	0.98017	0	0
50-50	en	ours	word2vec.run2	cbow	500	lemma	1	0.70044	0.69355	0.49	0.81818	0.8914	0.93333	0.97915	0	0	xours175	0.6983	0.69419	0.49029	0.82081	0.89262	0.93333	0.97938	0	0
50-50	en	ours	word2vec.run2	cbow	500	lemma	4	0.71675	0.71753	0.51005	0.83146	0.89797	0.91667	0.98038	0	0	xours175	0.71621	0.7188	0.51032	0.83429	0.90051	0.91667	0.98086	0	0
50-50	en	ours	word2vec.run2	cbow	500	lemma	8	0.7109	0.71017	0.5062	0.8172	0.89069	0.91667	0.97865	0	0	xours175	0.71012	0.71055	0.50532	0.82143	0.89339	0.91667	0.97916	0	0
50-50	en	ours	word2vec.run2	cbow	500	lemmapos	1	0.70338	0.6988	0.49675	0.82286	0.8969	0.93333	0.98072	3	0	xours175	0.7065	0.70616	0.50335	0.82558	0.90009	0.91667	0.98133	3	0
50-50	en	ours	word2vec.run2	cbow	500	lemmapos	4	0.71338	0.71422	0.50819	0.82081	0.90071	0.93333	0.98145	3	0	xours175	0.71423	0.71746	0.51019	0.82222	0.90305	0.93333	0.9819	3	0
50-50	en	ours	word2vec.run2	cbow	500	lemmapos	8	0.70123	0.69422	0.49191	0.82873	0.893	0.9	0.97993	3	0	xours175	0.70449	0.70034	0.49612	0.83146	0.89752	0.9	0.98079	3	0
50-50	en	ours	word2vec.run2	cbow	500	surface	1	0.70895	0.72496	0.52372	0.84656	0.88738	0.91667	0.97671	0	1	xours175	0.70758	0.72704	0.52584	0.85405	0.89057	0.91667	0.97728	0	0
50-50	en	ours	word2vec.run2	cbow	500	surface	4	0.70488	0.71682	0.51104	0.82796	0.8895	0.91667	0.97774	0	1	xours175	0.70141	0.7154	0.50887	0.8306	0.8907	0.91667	0.97796	0	0
50-50	en	ours	word2vec.run2	cbow	500	surface	8	0.69267	0.7014	0.49663	0.81437	0.87995	0.91667	0.97597	0	1	xours175	0.69049	0.6998	0.49481	0.81609	0.8814	0.91667	0.97624	0	0
50-50	en	ours	word2vec.run2	cbow	500	surface@stoppy	1	0.71322	0.72472	0.518	0.82051	0.89653	0.91667	0.98037	0	1	xours175	0.7113	0.72566	0.51847	0.82292	0.89748	0.91667	0.9805	0	0
50-50	en	ours	word2vec.run2	cbow	500	surface@stoppy	4	0.70685	0.71929	0.51254	0.83721	0.89076	0.91667	0.97814	0	1	xours175	0.70428	0.71765	0.51137	0.83529	0.89123	0.9	0.97822	0	0
50-50	en	ours	word2vec.run2	cbow	500	surface@stoppy	8	0.70094	0.71451	0.50781	0.82353	0.88798	0.91667	0.97773	0	1	xours175	0.69807	0.71361	0.50743	0.82143	0.88876	0.91667	0.97788	0	0
50-50	en	ours	word2vec.run2	skipgram	250	lemma	1	0.67288	0.66547	0.46564	0.82609	0.88262	0.9	0.97723	0	0	xours175	0.67087	0.66677	0.46636	0.82873	0.88421	0.88333	0.97752	0	0
50-50	en	ours	word2vec.run2	skipgram	250	lemma	4	0.6863	0.69096	0.48719	0.81522	0.88551	0.9	0.97746	0	0	xours175	0.68549	0.69149	0.48705	0.81768	0.88765	0.9	0.97787	0	0
50-50	en	ours	word2vec.run2	skipgram	250	lemma	8	0.68509	0.68746	0.48545	0.8	0.87998	0.91667	0.97619	0	0	xours175	0.68552	0.68932	0.48613	0.8024	0.88299	0.91667	0.97676	0	0
50-50	en	ours	word2vec.run2	skipgram	250	lemmapos	1	0.67622	0.67375	0.47016	0.80645	0.88524	0.9	0.97861	3	0	xours175	0.68077	0.68075	0.47627	0.81319	0.88836	0.9	0.97921	3	0
50-50	en	ours	word2vec.run2	skipgram	250	lemmapos	4	0.6805	0.69098	0.48806	0.81564	0.88823	0.9	0.97904	3	0	xours175	0.68364	0.69585	0.49191	0.81818	0.89134	0.9	0.97964	3	0
50-50	en	ours	word2vec.run2	skipgram	250	lemmapos	8	0.68281	0.69317	0.49203	0.81218	0.88821	0.9	0.97888	3	0	xours175	0.68523	0.69678	0.49441	0.81443	0.89132	0.9	0.97948	3	0
50-50	en	ours	word2vec.run2	skipgram	250	surface	1	0.69736	0.70816	0.50483	0.83077	0.87774	0.88333	0.97472	0	1	xours175	0.69511	0.70707	0.50335	0.8377	0.87971	0.86667	0.97507	0	0
50-50	en	ours	word2vec.run2	skipgram	250	surface	4	0.68362	0.69293	0.48955	0.82353	0.87579	0.9	0.97509	0	1	xours175	0.67973	0.69091	0.48718	0.82609	0.8767	0.9	0.97526	0	0
50-50	en	ours	word2vec.run2	skipgram	250	surface	8	0.6741	0.6831	0.47898	0.81111	0.87176	0.88333	0.97433	0	1	xours175	0.67173	0.68166	0.47719	0.81356	0.87297	0.88333	0.97456	0	0
50-50	en	ours	word2vec.run2	skipgram	250	surface@stoppy	1	0.69378	0.70364	0.49675	0.81609	0.87711	0.9	0.97313	0	1	xours175	0.69185	0.70502	0.49901	0.81871	0.87805	0.9	0.97326	0	0
50-50	en	ours	word2vec.run2	skipgram	250	surface@stoppy	4	0.69137	0.70105	0.49688	0.81871	0.87946	0.88333	0.97542	0	1	xours175	0.68834	0.69916	0.49546	0.81657	0.87937	0.88333	0.97538	0	0
50-50	en	ours	word2vec.run2	skipgram	250	surface@stoppy	8	0.68297	0.69422	0.49186	0.79769	0.87624	0.9	0.97534	0	1	xours175	0.67912	0.69235	0.49068	0.79532	0.87664	0.9	0.9754	0	0
50-50	en	ours	word2vec.run2	skipgram	750	lemma	1	0.70254	0.69694	0.49079	0.80925	0.8947	0.91667	0.98025	0	0	xours175	0.70126	0.70024	0.49402	0.81176	0.89655	0.91667	0.9806	0	0
50-50	en	ours	word2vec.run2	skipgram	750	lemma	4	0.7218	0.72497	0.51808	0.84091	0.89923	0.91667	0.98055	0	0	xours175	0.72027	0.72559	0.51737	0.84393	0.90154	0.91667	0.98098	0	0
50-50	en	ours	word2vec.run2	skipgram	750	lemma	8	0.71458	0.71392	0.51254	0.81865	0.89086	0.91667	0.97897	0	0	xours175	0.71388	0.71568	0.51321	0.82105	0.89394	0.91667	0.97956	0	0
50-50	en	ours	word2vec.run2	skipgram	750	lemmapos	1	0.69683	0.68297	0.47911	0.82682	0.89605	0.93333	0.98067	3	0	xours175	0.70222	0.69317	0.48797	0.83429	0.90074	0.93333	0.98156	3	0
50-50	en	ours	word2vec.run2	skipgram	750	lemmapos	4	0.7172	0.71342	0.50632	0.83158	0.90285	0.93333	0.98197	3	0	xours175	0.71833	0.71852	0.51019	0.83422	0.90608	0.93333	0.98259	3	0
50-50	en	ours	word2vec.run2	skipgram	750	lemmapos	8	0.71341	0.7074	0.50396	0.83616	0.8997	0.9	0.98121	3	0	xours175	0.71532	0.71238	0.50756	0.84571	0.90376	0.9	0.98198	3	0
50-50	en	ours	word2vec.run2	skipgram	750	surface	1	0.71197	0.71872	0.51199	0.83799	0.88842	0.9	0.97775	0	1	xours175	0.71081	0.72211	0.51461	0.84571	0.89217	0.9	0.97843	0	0
50-50	en	ours	word2vec.run2	skipgram	750	surface	4	0.70662	0.71782	0.51142	0.83696	0.89562	0.91667	0.97961	0	1	xours175	0.70405	0.71749	0.51058	0.83978	0.89706	0.91667	0.97988	0	0
50-50	en	ours	word2vec.run2	skipgram	750	surface	8	0.7005	0.70947	0.50322	0.82682	0.884	0.91667	0.97667	0	1	xours175	0.69871	0.70867	0.50256	0.82955	0.88589	0.91667	0.97702	0	0
50-50	en	ours	word2vec.run2	skipgram	750	surface@stoppy	1	0.7148	0.73227	0.52509	0.84916	0.90195	0.91667	0.98123	0	1	xours175	0.71326	0.73509	0.52768	0.85227	0.90361	0.91667	0.98152	0	0
50-50	en	ours	word2vec.run2	skipgram	750	surface@stoppy	4	0.71434	0.72988	0.52347	0.83146	0.89972	0.91667	0.98043	0	1	xours175	0.71125	0.72979	0.5236	0.83429	0.90051	0.91667	0.98057	0	0
50-50	en	ours	word2vec.run2	skipgram	750	surface@stoppy	8	0.70238	0.72049	0.51316	0.82353	0.89142	0.9	0.97899	0	1	xours175	0.69932	0.72043	0.51348	0.82635	0.89252	0.9	0.97918	0	0
50-50	en	ours	word2vec.run2	skipgram	500	lemma	1	0.69928	0.6912	0.49004	0.80447	0.88882	0.91667	0.97875	0	0	xours175	0.69632	0.69123	0.48942	0.80682	0.88976	0.91667	0.97892	0	0
50-50	en	ours	word2vec.run2	skipgram	500	lemma	4	0.71055	0.71179	0.50496	0.82955	0.89609	0.91667	0.97983	0	0	xours175	0.70985	0.71391	0.50677	0.83237	0.89875	0.91667	0.98033	0	0
50-50	en	ours	word2vec.run2	skipgram	500	lemma	8	0.7124	0.71344	0.50843	0.82759	0.8926	0.91667	0.9789	0	0	xours175	0.71238	0.71572	0.5098	0.83721	0.89593	0.91667	0.97953	0	0
50-50	en	ours	word2vec.run2	skipgram	500	lemmapos	1	0.70195	0.69563	0.49191	0.81609	0.89461	0.9	0.98033	3	0	xours175	0.70554	0.70329	0.49862	0.81871	0.89836	0.9	0.98104	3	0
50-50	en	ours	word2vec.run2	skipgram	500	lemmapos	4	0.71413	0.71376	0.51092	0.83422	0.8998	0.91667	0.98126	3	0	xours175	0.7155	0.71693	0.51308	0.83696	0.90231	0.91667	0.98174	3	0
50-50	en	ours	word2vec.run2	skipgram	500	lemmapos	8	0.70701	0.70324	0.49887	0.8427	0.8956	0.9	0.98028	3	0	xours175	0.70987	0.70877	0.50296	0.85227	0.89916	0.9	0.98096	3	0
50-50	en	ours	word2vec.run2	skipgram	500	surface	1	0.70912	0.72542	0.52658	0.83978	0.88312	0.9	0.97532	0	1	xours175	0.7073	0.72598	0.52728	0.84615	0.88518	0.9	0.97569	0	0
50-50	en	ours	word2vec.run2	skipgram	500	surface	4	0.70123	0.71671	0.51104	0.82902	0.88973	0.91667	0.97826	0	1	xours175	0.69891	0.71551	0.5094	0.83598	0.8913	0.91667	0.97856	0	0
50-50	en	ours	word2vec.run2	skipgram	500	surface	8	0.69674	0.70503	0.50292	0.82759	0.88099	0.91667	0.97625	0	1	xours175	0.69405	0.70295	0.50081	0.82955	0.88188	0.91667	0.97642	0	0
50-50	en	ours	word2vec.run2	skipgram	500	surface@stoppy	1	0.70663	0.71282	0.50483	0.82222	0.89501	0.91667	0.97997	0	1	xours175	0.70485	0.71453	0.50664	0.82486	0.89598	0.91667	0.98012	0	0
50-50	en	ours	word2vec.run2	skipgram	500	surface@stoppy	4	0.70527	0.71651	0.51179	0.82955	0.89023	0.91667	0.97789	0	1	xours175	0.70284	0.71595	0.51111	0.83237	0.89124	0.91667	0.97807	0	0
50-50	en	ours	word2vec.run2	skipgram	500	surface@stoppy	8	0.69875	0.71149	0.50583	0.82286	0.88901	0.9	0.97846	0	1	xours175	0.6965	0.71217	0.5073	0.82558	0.89086	0.9	0.9788	0	0
50-50	en	ours	word2vec.run3	cbow	250	lemma	1	0.67698	0.66997	0.46966	0.82873	0.88259	0.88333	0.97707	0	0	xours175	0.67498	0.67087	0.47009	0.83146	0.88425	0.88333	0.97737	0	0
50-50	en	ours	word2vec.run3	cbow	250	lemma	4	0.67419	0.67712	0.47625	0.81522	0.87739	0.9	0.97532	0	0	xours175	0.6741	0.67851	0.47732	0.81768	0.88003	0.9	0.97583	0	0
50-50	en	ours	word2vec.run3	cbow	250	lemma	8	0.68225	0.68801	0.48694	0.80423	0.87806	0.91667	0.97561	0	0	xours175	0.68244	0.68992	0.48771	0.80645	0.88137	0.91667	0.97625	0	0
50-50	en	ours	word2vec.run3	cbow	250	lemmapos	1	0.67913	0.675	0.47153	0.8	0.88438	0.91667	0.97839	3	0	xours175	0.68287	0.68176	0.47706	0.80233	0.8875	0.91667	0.97898	3	0
50-50	en	ours	word2vec.run3	cbow	250	lemmapos	4	0.68129	0.69124	0.48669	0.81081	0.88934	0.9	0.97919	3	0	xours175	0.68465	0.69649	0.49086	0.81319	0.89215	0.9	0.97973	3	0
50-50	en	ours	word2vec.run3	cbow	250	lemmapos	8	0.682	0.69273	0.49	0.81865	0.88752	0.88333	0.97865	3	0	xours175	0.6851	0.69713	0.49331	0.82105	0.89071	0.88333	0.97927	3	0
50-50	en	ours	word2vec.run3	cbow	250	surface	1	0.69539	0.70284	0.50023	0.82105	0.87975	0.9	0.97513	0	1	xours175	0.69204	0.70063	0.49809	0.82796	0.881	0.9	0.97535	0	0
50-50	en	ours	word2vec.run3	cbow	250	surface	4	0.69145	0.69867	0.49414	0.82292	0.88263	0.88333	0.97679	0	1	xours175	0.68738	0.69668	0.49218	0.8254	0.88274	0.86667	0.97679	0	0
50-50	en	ours	word2vec.run3	cbow	250	surface	8	0.67521	0.68248	0.47998	0.80723	0.8757	0.91667	0.97545	0	1	xours175	0.6731	0.68149	0.47877	0.80488	0.87668	0.9	0.97564	0	0
50-50	en	ours	word2vec.run3	cbow	250	surface@stoppy	1	0.68091	0.69189	0.4852	0.82353	0.87717	0.86667	0.975	0	1	xours175	0.67976	0.69276	0.48718	0.82143	0.87794	0.86667	0.9751	0	0
50-50	en	ours	word2vec.run3	cbow	250	surface@stoppy	4	0.68515	0.69635	0.49141	0.81818	0.8794	0.9	0.97524	0	1	xours175	0.68229	0.69449	0.48968	0.81609	0.8793	0.9	0.97521	0	0
50-50	en	ours	word2vec.run3	cbow	250	surface@stoppy	8	0.68391	0.69781	0.49303	0.81081	0.87982	0.91667	0.97608	0	1	xours175	0.68116	0.69658	0.49191	0.81319	0.88078	0.9	0.97625	0	0
50-50	en	ours	word2vec.run3	cbow	750	lemma	1	0.71254	0.71474	0.51092	0.82353	0.90305	0.9	0.98213	0	0	xours175	0.71183	0.71847	0.5144	0.82609	0.90561	0.9	0.98259	0	0
50-50	en	ours	word2vec.run3	cbow	750	lemma	4	0.72567	0.73121	0.5262	0.83041	0.89989	0.91667	0.98057	0	0	xours175	0.72478	0.73187	0.52649	0.83333	0.90219	0.91667	0.981	0	0
50-50	en	ours	word2vec.run3	cbow	750	lemma	8	0.71354	0.71365	0.51055	0.82796	0.89502	0.91667	0.97989	0	0	xours175	0.71367	0.71602	0.5119	0.8306	0.89881	0.91667	0.9806	0	0
50-50	en	ours	word2vec.run3	cbow	750	lemmapos	1	0.71483	0.70437	0.49713	0.83529	0.90022	0.9	0.98151	3	0	xours175	0.718	0.71216	0.50467	0.83832	0.90335	0.9	0.98208	3	0
50-50	en	ours	word2vec.run3	cbow	750	lemmapos	4	0.71288	0.70532	0.5021	0.82558	0.89813	0.9	0.98082	3	0	xours175	0.71348	0.70804	0.50348	0.8284	0.90046	0.9	0.98127	3	0
50-50	en	ours	word2vec.run3	cbow	750	lemmapos	8	0.71394	0.70742	0.50359	0.83908	0.898	0.9	0.98074	3	0	xours175	0.71513	0.71173	0.50651	0.84211	0.90034	0.9	0.98119	3	0
50-50	en	ours	word2vec.run3	cbow	750	surface	1	0.71172	0.72259	0.51552	0.83616	0.88928	0.91667	0.97797	0	1	xours175	0.70936	0.72427	0.51716	0.84393	0.89184	0.9	0.97843	0	0
50-50	en	ours	word2vec.run3	cbow	750	surface	4	0.71196	0.72186	0.51651	0.83696	0.89451	0.91667	0.97932	0	1	xours175	0.7087	0.72095	0.51571	0.83978	0.89562	0.91667	0.97952	0	0
50-50	en	ours	word2vec.run3	cbow	750	surface	8	0.70537	0.71331	0.50769	0.83333	0.88981	0.9	0.97873	0	1	xours175	0.70311	0.71171	0.50519	0.83133	0.89118	0.9	0.97899	0	0
50-50	en	ours	word2vec.run3	cbow	750	surface@stoppy	1	0.70882	0.72831	0.52248	0.84153	0.9027	0.93333	0.9814	0	1	xours175	0.70644	0.73067	0.52505	0.84916	0.90481	0.93333	0.98177	0	0
50-50	en	ours	word2vec.run3	cbow	750	surface@stoppy	4	0.70706	0.72313	0.51477	0.82635	0.89283	0.9	0.97884	0	1	xours175	0.70443	0.72272	0.51427	0.82424	0.89403	0.9	0.97907	0	0
50-50	en	ours	word2vec.run3	cbow	750	surface@stoppy	8	0.70342	0.71773	0.50851	0.8284	0.89252	0.91667	0.979	0	1	xours175	0.70059	0.71716	0.50764	0.83133	0.89371	0.91667	0.97923	0	0
50-50	en	ours	word2vec.run3	cbow	500	lemma	1	0.70215	0.69228	0.48917	0.82486	0.89062	0.91667	0.97873	0	0	xours175	0.70058	0.69403	0.49047	0.82759	0.89204	0.91667	0.97899	0	0
50-50	en	ours	word2vec.run3	cbow	500	lemma	4	0.71744	0.72052	0.51398	0.83146	0.89753	0.91667	0.98008	0	0	xours175	0.71685	0.72174	0.51487	0.83429	0.90008	0.91667	0.98056	0	0
50-50	en	ours	word2vec.run3	cbow	500	lemma	8	0.70667	0.70581	0.50172	0.81915	0.89115	0.91667	0.97879	0	0	xours175	0.7064	0.70788	0.50296	0.8284	0.89458	0.91667	0.97944	0	0
50-50	en	ours	word2vec.run3	cbow	500	lemmapos	1	0.69576	0.682	0.477	0.82955	0.89593	0.9	0.98078	3	0	xours175	0.69916	0.68939	0.48389	0.83237	0.89887	0.9	0.98134	3	0
50-50	en	ours	word2vec.run3	cbow	500	lemmapos	4	0.70092	0.70248	0.49899	0.82558	0.89522	0.9	0.98034	3	0	xours175	0.70197	0.70547	0.50072	0.8284	0.89724	0.9	0.98073	3	0
50-50	en	ours	word2vec.run3	cbow	500	lemmapos	8	0.70223	0.69759	0.49427	0.82353	0.89568	0.9	0.9803	3	0	xours175	0.70442	0.70232	0.49744	0.82635	0.89904	0.9	0.98094	3	0
50-50	en	ours	word2vec.run3	cbow	500	surface	1	0.7155	0.72984	0.52794	0.83871	0.88864	0.91667	0.97726	0	1	xours175	0.71367	0.73063	0.52846	0.84615	0.8911	0.9	0.97771	0	0
50-50	en	ours	word2vec.run3	cbow	500	surface	4	0.70302	0.70715	0.5021	0.82418	0.88858	0.91667	0.97805	0	1	xours175	0.69925	0.70518	0.50007	0.82682	0.88911	0.91667	0.97814	0	0
50-50	en	ours	word2vec.run3	cbow	500	surface	8	0.6972	0.70583	0.49998	0.83146	0.88434	0.9	0.97689	0	1	xours175	0.69559	0.70496	0.49928	0.83429	0.88618	0.9	0.97724	0	0
50-50	en	ours	word2vec.run3	cbow	500	surface@stoppy	1	0.70945	0.71939	0.51129	0.81522	0.89234	0.91667	0.9795	0	1	xours175	0.7091	0.72293	0.51532	0.82222	0.89448	0.9	0.97987	0	0
50-50	en	ours	word2vec.run3	cbow	500	surface@stoppy	4	0.70327	0.71396	0.50889	0.81967	0.88469	0.91667	0.97675	0	1	xours175	0.7002	0.71217	0.50725	0.82222	0.88485	0.9	0.97677	0	0
50-50	en	ours	word2vec.run3	cbow	500	surface@stoppy	8	0.70178	0.71662	0.51005	0.8284	0.88533	0.91667	0.97692	0	1	xours175	0.69874	0.71664	0.51085	0.83133	0.88665	0.91667	0.97716	0	0
50-50	en	ours	word2vec.run3	skipgram	250	lemma	1	0.66488	0.65951	0.45699	0.80682	0.87574	0.91667	0.97566	0	0	xours175	0.66374	0.66312	0.45997	0.80925	0.87754	0.91667	0.976	0	0
50-50	en	ours	word2vec.run3	skipgram	250	lemma	4	0.68573	0.68941	0.48938	0.82418	0.88406	0.9	0.9769	0	0	xours175	0.68506	0.69015	0.48924	0.82682	0.88617	0.9	0.9773	0	0
50-50	en	ours	word2vec.run3	skipgram	250	lemma	8	0.67397	0.68007	0.47923	0.80208	0.87399	0.9	0.97456	0	0	xours175	0.67553	0.683	0.48113	0.80423	0.87744	0.9	0.97523	0	0
50-50	en	ours	word2vec.run3	skipgram	250	lemmapos	1	0.68654	0.68327	0.47861	0.81967	0.8903	0.9	0.97947	3	0	xours175	0.69061	0.69176	0.486	0.82222	0.89455	0.91667	0.9803	3	0
50-50	en	ours	word2vec.run3	skipgram	250	lemmapos	4	0.68486	0.69709	0.49397	0.81395	0.89023	0.9	0.97939	3	0	xours175	0.68747	0.7021	0.49818	0.81657	0.89366	0.9	0.98005	3	0
50-50	en	ours	word2vec.run3	skipgram	250	lemmapos	8	0.67528	0.68632	0.48515	0.81633	0.88596	0.9	0.97841	3	0	xours175	0.67927	0.6923	0.48989	0.82292	0.89048	0.9	0.97929	3	0
50-50	en	ours	word2vec.run3	skipgram	250	surface	1	0.69654	0.70766	0.50508	0.83158	0.88122	0.9	0.97557	0	1	xours175	0.69335	0.70606	0.50283	0.83871	0.88265	0.9	0.97583	0	0
50-50	en	ours	word2vec.run3	skipgram	250	surface	4	0.68385	0.69464	0.49153	0.82222	0.87638	0.9	0.97545	0	1	xours175	0.67924	0.69264	0.48942	0.82486	0.877	0.9	0.97555	0	0
50-50	en	ours	word2vec.run3	skipgram	250	surface	8	0.68047	0.68625	0.48234	0.81437	0.8714	0.88333	0.97424	0	1	xours175	0.67823	0.68485	0.48087	0.81212	0.87272	0.88333	0.97449	0	0
50-50	en	ours	word2vec.run3	skipgram	250	surface@stoppy	1	0.68353	0.69672	0.48967	0.81395	0.87678	0.9	0.97446	0	1	xours175	0.68118	0.69731	0.49099	0.81657	0.87797	0.9	0.97465	0	0
50-50	en	ours	word2vec.run3	skipgram	250	surface@stoppy	4	0.68841	0.6999	0.49887	0.80435	0.87599	0.9	0.97473	0	1	xours175	0.68519	0.69779	0.49691	0.80663	0.87605	0.88333	0.97472	0	0
50-50	en	ours	word2vec.run3	skipgram	250	surface@stoppy	8	0.68377	0.69551	0.4924	0.80851	0.87597	0.91667	0.97472	0	1	xours175	0.67969	0.69374	0.49113	0.81081	0.87646	0.91667	0.97479	0	0
50-50	en	ours	word2vec.run3	skipgram	750	lemma	1	0.69707	0.69614	0.49352	0.82234	0.89229	0.91667	0.97963	0	0	xours175	0.69645	0.70167	0.49862	0.82902	0.89428	0.91667	0.97998	0	0
50-50	en	ours	word2vec.run3	skipgram	750	lemma	4	0.72517	0.72685	0.52496	0.81633	0.89667	0.91667	0.97989	0	0	xours175	0.72381	0.72714	0.52399	0.82424	0.89944	0.91667	0.98041	0	0
50-50	en	ours	word2vec.run3	skipgram	750	lemma	8	0.71939	0.72124	0.51659	0.82418	0.89524	0.91667	0.97964	0	0	xours175	0.71876	0.72263	0.51685	0.82682	0.89762	0.91667	0.98009	0	0
50-50	en	ours	word2vec.run3	skipgram	750	lemmapos	1	0.70641	0.69563	0.49174	0.81818	0.89662	0.91667	0.98078	3	0	xours175	0.71061	0.70517	0.50002	0.82558	0.90101	0.91667	0.98161	3	0
50-50	en	ours	word2vec.run3	skipgram	750	lemmapos	4	0.71794	0.7087	0.50446	0.83616	0.90186	0.91667	0.98167	3	0	xours175	0.71971	0.71309	0.50717	0.83908	0.90485	0.91667	0.98224	3	0
50-50	en	ours	word2vec.run3	skipgram	750	lemmapos	8	0.71966	0.71231	0.50533	0.83616	0.90222	0.91667	0.98174	3	0	xours175	0.72053	0.71665	0.50874	0.83908	0.90506	0.91667	0.98228	3	0
50-50	en	ours	word2vec.run3	skipgram	750	surface	1	0.71282	0.72839	0.52409	0.84444	0.88942	0.9	0.97711	0	1	xours175	0.71103	0.73	0.5257	0.85227	0.89227	0.9	0.97761	0	0
50-50	en	ours	word2vec.run3	skipgram	750	surface	4	0.70692	0.71814	0.51204	0.8306	0.8923	0.9	0.97876	0	1	xours175	0.70404	0.7175	0.51032	0.83333	0.89403	0.9	0.97908	0	0
50-50	en	ours	word2vec.run3	skipgram	750	surface	8	0.70424	0.71328	0.50831	0.83333	0.88632	0.9	0.97771	0	1	xours175	0.70177	0.71298	0.50743	0.83616	0.88828	0.9	0.97808	0	0
50-50	en	ours	word2vec.run3	skipgram	750	surface@stoppy	1	0.7127	0.72054	0.51428	0.82873	0.89855	0.93333	0.98068	0	1	xours175	0.71034	0.72218	0.51584	0.83146	0.89977	0.91667	0.9809	0	0
50-50	en	ours	word2vec.run3	skipgram	750	surface@stoppy	4	0.7172	0.73282	0.5236	0.84706	0.90102	0.9	0.98106	0	1	xours175	0.71396	0.73176	0.52255	0.84524	0.90143	0.9	0.98113	0	0
50-50	en	ours	word2vec.run3	skipgram	750	surface@stoppy	8	0.70659	0.72178	0.51564	0.82292	0.89303	0.91667	0.97922	0	1	xours175	0.70457	0.72233	0.51703	0.82979	0.89446	0.91667	0.97948	0	0
50-50	en	ours	word2vec.run3	skipgram	500	lemma	1	0.69178	0.67422	0.47289	0.81395	0.88816	0.9	0.9788	0	0	xours175	0.69165	0.67921	0.47706	0.81657	0.89005	0.9	0.97915	0	0
50-50	en	ours	word2vec.run3	skipgram	500	lemma	4	0.71213	0.71676	0.51204	0.83422	0.89394	0.91667	0.97934	0	0	xours175	0.71278	0.71947	0.514	0.83696	0.89716	0.91667	0.97995	0	0
50-50	en	ours	word2vec.run3	skipgram	500	lemma	8	0.70374	0.70598	0.50565	0.81053	0.88501	0.91667	0.97727	0	0	xours175	0.70371	0.70845	0.50751	0.81283	0.88802	0.91667	0.97784	0	0
50-50	en	ours	word2vec.run3	skipgram	500	lemmapos	1	0.688	0.67022	0.4673	0.8022	0.88647	0.91667	0.97875	3	0	xours175	0.69084	0.67738	0.47351	0.80899	0.88902	0.9	0.97923	3	0
50-50	en	ours	word2vec.run3	skipgram	500	lemmapos	4	0.70825	0.70356	0.50056	0.83429	0.89891	0.91667	0.98113	3	0	xours175	0.70916	0.70729	0.50291	0.83721	0.90117	0.91667	0.98157	3	0
50-50	en	ours	word2vec.run3	skipgram	500	lemmapos	8	0.70318	0.70128	0.49832	0.82286	0.89227	0.9	0.97944	3	0	xours175	0.70528	0.70625	0.50199	0.82558	0.89583	0.9	0.98013	3	0
50-50	en	ours	word2vec.run3	skipgram	500	surface	1	0.70803	0.72296	0.5233	0.84324	0.88201	0.91667	0.97556	0	1	xours175	0.70582	0.72355	0.52395	0.85083	0.88439	0.9	0.97599	0	0
50-50	en	ours	word2vec.run3	skipgram	500	surface	4	0.70209	0.71233	0.50719	0.82873	0.88776	0.91667	0.97736	0	1	xours175	0.69893	0.71156	0.50598	0.83333	0.88925	0.9	0.97763	0	0
50-50	en	ours	word2vec.run3	skipgram	500	surface	8	0.70105	0.71002	0.50446	0.83041	0.88442	0.91667	0.97697	0	1	xours175	0.69835	0.70811	0.50243	0.83041	0.88543	0.91667	0.97716	0	0
50-50	en	ours	word2vec.run3	skipgram	500	surface@stoppy	1	0.70587	0.71423	0.50632	0.81481	0.89259	0.93333	0.97932	0	1	xours175	0.70373	0.71521	0.50769	0.8172	0.89357	0.93333	0.97949	0	0
50-50	en	ours	word2vec.run3	skipgram	500	surface@stoppy	4	0.70513	0.71903	0.51229	0.83616	0.89178	0.9	0.97823	0	1	xours175	0.70077	0.71785	0.51124	0.83908	0.89227	0.9	0.9783	0	0
50-50	en	ours	word2vec.run3	skipgram	500	surface@stoppy	8	0.70323	0.71739	0.51075	0.82635	0.88606	0.91667	0.97749	0	1	xours175	0.70035	0.71669	0.51027	0.82424	0.88722	0.9	0.97771	0	0
50-50	en	ours	minimantics	salehi	1000	lemma	1	0.58009	0.57994	0.40157	0.78161	0.82371	0.83333	0.96365	0	0	xours175	0.58023	0.58586	0.4054	0.7907	0.83146	0.85	0.96526	0	0
50-50	en	ours	minimantics	salehi	1000	lemma	4	0.62369	0.62653	0.4417	0.78075	0.84584	0.83333	0.96915	0	0	xours175	0.62347	0.62922	0.44366	0.78919	0.85129	0.85	0.97025	0	0
50-50	en	ours	minimantics	salehi	1000	lemma	8	0.62529	0.62574	0.44016	0.78261	0.85027	0.85	0.97042	0	0	xours175	0.62343	0.62604	0.43993	0.79121	0.85437	0.85	0.97123	0	0
50-50	en	ours	minimantics	salehi	1000	lemmapos	1	0.56815	0.56264	0.38454	0.77273	0.82	0.88333	0.96262	0	0	xours175	0.56843	0.56829	0.38818	0.78161	0.82782	0.88333	0.96425	0	0
50-50	en	ours	minimantics	salehi	1000	lemmapos	4	0.61666	0.63023	0.44108	0.79787	0.85388	0.86667	0.9708	0	0	xours175	0.61644	0.63377	0.44393	0.80645	0.85968	0.86667	0.97194	0	0
50-50	en	ours	minimantics	salehi	1000	lemmapos	8	0.61657	0.63167	0.4417	0.78723	0.85814	0.88333	0.97211	0	0	xours175	0.61476	0.63404	0.44379	0.7957	0.86289	0.88333	0.97305	0	0
50-50	en	ours	minimantics	salehi	1000	surface	1	0.53847	0.50861	0.34353	0.74286	0.7982	0.81667	0.95775	0	1	xours175	0.5406	0.51132	0.34466	0.75145	0.80336	0.81667	0.95884	0	0
50-50	en	ours	minimantics	salehi	1000	surface	4	0.61341	0.60575	0.4248	0.78392	0.84509	0.86667	0.96914	0	0	xours175	0.60739	0.60033	0.41908	0.78571	0.84636	0.86667	0.96938	0	0
50-50	en	ours	minimantics	salehi	1000	surface	8	0.61736	0.60892	0.42729	0.7931	0.84942	0.86667	0.97018	0	0	xours175	0.6139	0.60754	0.42499	0.79769	0.85242	0.86667	0.97078	0	0
50-50	en	ours	minimantics	salehi	1000	surface@stoppy	1	0.51718	0.49142	0.32839	0.72642	0.78116	0.78333	0.95303	0	2	xours175	0.52226	0.50017	0.33506	0.73684	0.78776	0.78333	0.95445	0	1
50-50	en	ours	minimantics	salehi	1000	surface@stoppy	4	0.59858	0.59125	0.41213	0.77907	0.82775	0.85	0.96451	0	0	xours175	0.59566	0.59194	0.41224	0.78363	0.83104	0.85	0.96517	0	0
50-50	en	ours	minimantics	salehi	1000	surface@stoppy	8	0.63014	0.62408	0.43937	0.78613	0.85125	0.86667	0.9703	0	0	xours175	0.62793	0.62417	0.43901	0.7907	0.85456	0.86667	0.97095	0	0
50-50	en	ours	minimantics	PPMIthreshold	250	lemma	1	0.61762	0.65163	0.46047	0.80851	0.8599	0.86667	0.97224	0	0	xours175	0.61673	0.65484	0.46273	0.81081	0.86318	0.86667	0.97288	0	0
50-50	en	ours	minimantics	PPMIthreshold	250	lemma	4	0.63393	0.66404	0.4714	0.82558	0.8576	0.86667	0.9708	0	0	xours175	0.63297	0.66577	0.47232	0.82353	0.85923	0.86667	0.97113	0	0
50-50	en	ours	minimantics	PPMIthreshold	250	lemma	8	0.63367	0.66309	0.47078	0.82022	0.85158	0.86667	0.96877	0	0	xours175	0.63149	0.6629	0.46956	0.81818	0.8529	0.86667	0.96903	0	0
50-50	en	ours	minimantics	PPMIthreshold	250	lemmapos	1	0.63032	0.66136	0.46743	0.81915	0.86988	0.86667	0.97481	0	0	xours175	0.62941	0.66377	0.46877	0.82162	0.87296	0.86667	0.97541	0	0
50-50	en	ours	minimantics	PPMIthreshold	250	lemmapos	4	0.645	0.66652	0.46974	0.81818	0.8625	0.86667	0.97281	0	0	xours175	0.64439	0.66898	0.47057	0.82081	0.86473	0.86667	0.97326	0	0
50-50	en	ours	minimantics	PPMIthreshold	250	lemmapos	8	0.65118	0.66594	0.47322	0.82286	0.86189	0.86667	0.97225	0	0	xours175	0.64961	0.66738	0.47385	0.82081	0.86381	0.86667	0.97263	0	0
50-50	en	ours	minimantics	PPMIthreshold	250	surface	1	0.59101	0.65169	0.45533	0.81437	0.85783	0.86667	0.97045	0	0	xours175	0.58985	0.65566	0.45834	0.81707	0.86327	0.86667	0.97155	0	0
50-50	en	ours	minimantics	PPMIthreshold	250	surface	4	0.60791	0.66351	0.47178	0.8125	0.8558	0.86667	0.97014	0	0	xours175	0.60337	0.65942	0.46759	0.81481	0.85638	0.86667	0.97025	0	0
50-50	en	ours	minimantics	PPMIthreshold	250	surface	8	0.61387	0.6514	0.46171	0.80851	0.8512	0.88333	0.96902	0	0	xours175	0.60868	0.64558	0.45523	0.80645	0.85136	0.88333	0.96905	0	0
50-50	en	ours	minimantics	PPMIthreshold	250	surface@stoppy	1	0.55605	0.59147	0.40984	0.81768	0.86255	0.83333	0.97319	0	1	xours175	0.55446	0.59486	0.41127	0.82682	0.86792	0.85	0.97425	0	0
50-50	en	ours	minimantics	PPMIthreshold	250	surface@stoppy	4	0.59979	0.65765	0.45935	0.81675	0.85621	0.86667	0.97072	0	0	xours175	0.59563	0.65434	0.45589	0.81481	0.85632	0.86667	0.97074	0	0
50-50	en	ours	minimantics	PPMIthreshold	250	surface@stoppy	8	0.61711	0.65921	0.46465	0.80628	0.86057	0.88333	0.97179	0	0	xours175	0.61152	0.65538	0.46057	0.80423	0.86053	0.88333	0.97178	0	0
50-50	en	ours	minimantics	PPMIthreshold	750	lemma	1	0.62857	0.66589	0.46917	0.82474	0.87318	0.85	0.97528	0	0	xours175	0.6274	0.66572	0.46838	0.82723	0.87647	0.85	0.97591	0	0
50-50	en	ours	minimantics	PPMIthreshold	750	lemma	4	0.64992	0.69056	0.48955	0.82	0.88196	0.88333	0.97665	0	0	xours175	0.65004	0.69403	0.49165	0.82558	0.886	0.88333	0.97742	0	0
50-50	en	ours	minimantics	PPMIthreshold	750	lemma	8	0.65162	0.69648	0.50019	0.83422	0.87568	0.88333	0.97462	0	0	xours175	0.64911	0.69634	0.4991	0.83696	0.87755	0.88333	0.97498	0	0
50-50	en	ours	minimantics	PPMIthreshold	750	lemmapos	1	0.64163	0.68491	0.48888	0.82902	0.87559	0.88333	0.97584	0	0	xours175	0.64138	0.68675	0.48989	0.83158	0.87952	0.88333	0.9766	0	0
50-50	en	ours	minimantics	PPMIthreshold	750	lemmapos	4	0.66391	0.70011	0.50064	0.8172	0.88281	0.9	0.97701	0	0	xours175	0.66456	0.70439	0.50436	0.82609	0.88684	0.9	0.97777	0	0
50-50	en	ours	minimantics	PPMIthreshold	750	lemmapos	8	0.66526	0.70356	0.50533	0.83871	0.88173	0.9	0.97642	0	0	xours175	0.664	0.70496	0.50638	0.84153	0.88405	0.9	0.97685	0	0
50-50	en	ours	minimantics	PPMIthreshold	750	surface	1	0.61382	0.66044	0.45873	0.81218	0.87582	0.9	0.97587	0	0	xours175	0.61044	0.6584	0.45563	0.81443	0.87794	0.9	0.97627	0	0
50-50	en	ours	minimantics	PPMIthreshold	750	surface	4	0.63297	0.69803	0.49874	0.82162	0.8829	0.91667	0.97646	0	0	xours175	0.62908	0.69505	0.49573	0.82081	0.88369	0.91667	0.9766	0	0
50-50	en	ours	minimantics	PPMIthreshold	750	surface	8	0.6298	0.69938	0.50384	0.83516	0.87049	0.9	0.973	0	0	xours175	0.62419	0.69451	0.49967	0.83333	0.87042	0.9	0.97298	0	0
50-50	en	ours	minimantics	PPMIthreshold	750	surface@stoppy	1	0.59583	0.6224	0.43238	0.81818	0.86897	0.88333	0.97453	0	1	xours175	0.59337	0.62148	0.42973	0.82353	0.87233	0.88333	0.97518	0	0
50-50	en	ours	minimantics	PPMIthreshold	750	surface@stoppy	4	0.6218	0.67312	0.46991	0.83077	0.87982	0.9	0.97626	0	0	xours175	0.61803	0.67074	0.46601	0.82902	0.88064	0.9	0.97641	0	0
50-50	en	ours	minimantics	PPMIthreshold	750	surface@stoppy	8	0.63172	0.69854	0.49738	0.82486	0.88193	0.9	0.9765	0	0	xours175	0.62646	0.69387	0.49257	0.82286	0.8817	0.9	0.97646	0	0
50-50	en	ours	minimantics	PPMIthreshold	500	lemma	1	0.62421	0.65782	0.46303	0.81633	0.86772	0.85	0.9741	0	0	xours175	0.62379	0.66059	0.46452	0.81865	0.87228	0.85	0.97499	0	0
50-50	en	ours	minimantics	PPMIthreshold	500	lemma	4	0.64842	0.6862	0.48843	0.82412	0.88149	0.88333	0.97667	0	0	xours175	0.64793	0.68902	0.49073	0.82759	0.88469	0.88333	0.97727	0	0
50-50	en	ours	minimantics	PPMIthreshold	500	lemma	8	0.64588	0.68731	0.49054	0.81218	0.86811	0.88333	0.97364	0	0	xours175	0.6436	0.68684	0.48902	0.81443	0.86973	0.88333	0.97396	0	0
50-50	en	ours	minimantics	PPMIthreshold	500	lemmapos	1	0.62869	0.66607	0.47004	0.83243	0.87003	0.88333	0.9747	0	0	xours175	0.62812	0.66803	0.47114	0.83516	0.87422	0.88333	0.97552	0	0
50-50	en	ours	minimantics	PPMIthreshold	500	lemmapos	4	0.65593	0.68926	0.49079	0.81609	0.88027	0.88333	0.97682	0	0	xours175	0.65669	0.69387	0.49468	0.82558	0.88444	0.88333	0.97762	0	0
50-50	en	ours	minimantics	PPMIthreshold	500	lemmapos	8	0.66144	0.69675	0.50185	0.82609	0.87527	0.88333	0.97541	0	0	xours175	0.65975	0.69729	0.50217	0.82873	0.87721	0.88333	0.97579	0	0
50-50	en	ours	minimantics	PPMIthreshold	500	surface	1	0.60234	0.65168	0.4552	0.81407	0.87093	0.9	0.97457	0	0	xours175	0.59939	0.65014	0.45321	0.81633	0.87342	0.9	0.97504	0	0
50-50	en	ours	minimantics	PPMIthreshold	500	surface	4	0.62024	0.69234	0.4931	0.81818	0.87875	0.9	0.97597	0	0	xours175	0.61598	0.68868	0.48924	0.81633	0.87919	0.9	0.97606	0	0
50-50	en	ours	minimantics	PPMIthreshold	500	surface	8	0.62205	0.6854	0.49129	0.8254	0.86931	0.88333	0.97366	0	0	xours175	0.61599	0.67969	0.48534	0.82353	0.86886	0.88333	0.97357	0	0
50-50	en	ours	minimantics	PPMIthreshold	500	surface@stoppy	1	0.57719	0.60496	0.41536	0.79769	0.8643	0.9	0.9735	0	1	xours175	0.57402	0.6041	0.41303	0.80488	0.86733	0.9	0.97409	0	0
50-50	en	ours	minimantics	PPMIthreshold	500	surface@stoppy	4	0.60286	0.66718	0.46755	0.82292	0.87164	0.9	0.97353	0	0	xours175	0.59859	0.66325	0.46273	0.82105	0.87193	0.9	0.97358	0	0
50-50	en	ours	minimantics	PPMIthreshold	500	surface@stoppy	8	0.62263	0.69143	0.49091	0.83146	0.8769	0.9	0.97488	0	0	xours175	0.61732	0.68766	0.48744	0.82955	0.87664	0.9	0.97483	0	0
50-50	en	ours	dissect	svd	250	lemma	1	0.654	0.65997	0.47289	0.79227	0.84289	0.83333	0.96834	0	0	xours175	0.65223	0.65833	0.47088	0.79803	0.84488	0.83333	0.96874	0	0
50-50	en	ours	dissect	svd	250	lemma	4	0.6488	0.65488	0.46867	0.78919	0.83772	0.81667	0.96719	0	0	xours175	0.64617	0.65345	0.46654	0.79121	0.84061	0.81667	0.96777	0	0
50-50	en	ours	dissect	svd	250	lemma	8	0.65568	0.66518	0.47886	0.80435	0.84868	0.83333	0.96965	0	0	xours175	0.65178	0.66242	0.47561	0.80663	0.85075	0.83333	0.97006	0	0
50-50	en	ours	dissect	svd	250	lemmapos	1	0.64042	0.64438	0.46246	0.8	0.8349	0.81667	0.96443	0	0	xours175	0.63205	0.63828	0.45655	0.79769	0.83523	0.81667	0.96449	0	0
50-50	en	ours	dissect	svd	250	lemmapos	4	0.64848	0.65355	0.46402	0.79558	0.85156	0.88333	0.96941	0	0	xours175	0.64161	0.64976	0.46162	0.79775	0.85099	0.88333	0.96924	0	0
50-50	en	ours	dissect	svd	250	lemmapos	8	0.65532	0.65607	0.46544	0.79793	0.85159	0.86667	0.96999	0	0	xours175	0.64903	0.65146	0.46168	0.8	0.85084	0.85	0.96978	0	0
50-50	en	ours	dissect	svd	250	surface	1	0.67457	0.68298	0.49228	0.81967	0.84907	0.83333	0.96795	0	0	xours175	0.66715	0.67669	0.48587	0.81768	0.84911	0.83333	0.96795	0	0
50-50	en	ours	dissect	svd	250	surface	4	0.66847	0.67126	0.477	0.8022	0.84296	0.81667	0.96753	0	0	xours175	0.66037	0.66527	0.47246	0.8	0.84289	0.81667	0.96751	0	0
50-50	en	ours	dissect	svd	250	surface	8	0.66586	0.67239	0.47836	0.8022	0.84684	0.85	0.96864	0	0	xours175	0.65875	0.66626	0.47403	0.8	0.84656	0.83333	0.96857	0	0
50-50	en	ours	dissect	svd	250	surface@stoppy	1	0.62631	0.63524	0.45098	0.80874	0.8616	0.9	0.97063	0	0	xours175	0.62055	0.6317	0.44782	0.81111	0.86253	0.9	0.9708	0	0
50-50	en	ours	dissect	svd	250	surface@stoppy	4	0.66983	0.6758	0.48184	0.82222	0.84869	0.85	0.96769	0	0	xours175	0.66174	0.66997	0.4764	0.82022	0.84816	0.85	0.96758	0	0
50-50	en	ours	dissect	svd	250	surface@stoppy	8	0.66788	0.67361	0.47874	0.81319	0.8454	0.83333	0.96772	0	0	xours175	0.65967	0.66793	0.47509	0.81111	0.84495	0.81667	0.96761	0	0
50-50	en	ours	dissect	svd	750	lemma	1	0.67967	0.68957	0.49713	0.80214	0.86074	0.86667	0.97234	0	0	xours175	0.67906	0.69056	0.49783	0.80435	0.86342	0.86667	0.97286	0	0
50-50	en	ours	dissect	svd	750	lemma	4	0.69212	0.69954	0.50135	0.81373	0.86949	0.85	0.97444	0	0	xours175	0.69231	0.70339	0.5048	0.81592	0.87402	0.86667	0.97534	0	0
50-50	en	ours	dissect	svd	750	lemma	8	0.70848	0.72126	0.5231	0.82902	0.88141	0.86667	0.9769	0	0	xours175	0.70714	0.72354	0.52452	0.83158	0.88548	0.88333	0.97771	0	0
50-50	en	ours	dissect	svd	750	lemmapos	1	0.63002	0.65032	0.46651	0.80226	0.83254	0.81667	0.96061	0	0	xours175	0.62134	0.64378	0.45965	0.8	0.83267	0.81667	0.96061	0	0
50-50	en	ours	dissect	svd	750	lemmapos	4	0.64271	0.65039	0.46146	0.8	0.8492	0.85	0.96937	0	0	xours175	0.63654	0.64639	0.45799	0.80233	0.85013	0.85	0.96955	0	0
50-50	en	ours	dissect	svd	750	lemmapos	8	0.66784	0.66876	0.47533	0.8	0.86123	0.86667	0.97244	0	0	xours175	0.66101	0.66433	0.47109	0.79775	0.86093	0.86667	0.97237	0	0
50-50	en	ours	dissect	svd	750	surface	1	0.67762	0.69428	0.49753	0.8306	0.86355	0.88333	0.97221	0	0	xours175	0.67412	0.69127	0.49528	0.82873	0.86489	0.88333	0.97247	0	0
50-50	en	ours	dissect	svd	750	surface	4	0.69297	0.6998	0.49961	0.80769	0.86269	0.86667	0.97245	0	0	xours175	0.68671	0.69527	0.49546	0.80976	0.86311	0.86667	0.97252	0	0
50-50	en	ours	dissect	svd	750	surface	8	0.70512	0.71061	0.50988	0.80899	0.87318	0.88333	0.97473	0	0	xours175	0.699	0.70667	0.50672	0.80682	0.87308	0.86667	0.97469	0	0
50-50	en	ours	dissect	svd	750	surface@stoppy	1	0.64402	0.64587	0.45885	0.82022	0.86701	0.88333	0.97306	0	0	xours175	0.63961	0.64379	0.45668	0.82286	0.86866	0.88333	0.97337	0	0
50-50	en	ours	dissect	svd	750	surface@stoppy	4	0.67915	0.68447	0.48644	0.82105	0.85742	0.85	0.97096	0	0	xours175	0.67302	0.67994	0.48232	0.81915	0.85767	0.85	0.97101	0	0
50-50	en	ours	dissect	svd	750	surface@stoppy	8	0.69303	0.6997	0.50172	0.80412	0.86229	0.86667	0.97231	0	0	xours175	0.68639	0.6942	0.49678	0.80392	0.86224	0.86667	0.97228	0	0
50-50	en	ours	dissect	svd	500	lemma	1	0.67762	0.68527	0.49539	0.80412	0.85497	0.85	0.97092	0	0	xours175	0.6767	0.6854	0.49546	0.80628	0.85715	0.85	0.97135	0	0
50-50	en	ours	dissect	svd	500	lemma	4	0.67973	0.68454	0.48905	0.80976	0.85951	0.88333	0.9722	0	0	xours175	0.67889	0.68527	0.48915	0.81188	0.86288	0.88333	0.97286	0	0
50-50	en	ours	dissect	svd	500	lemma	8	0.69348	0.69537	0.50205	0.82	0.86902	0.86667	0.97416	0	0	xours175	0.69193	0.69618	0.50265	0.82234	0.87251	0.86667	0.97484	0	0
50-50	en	ours	dissect	svd	500	lemmapos	1	0.64404	0.65881	0.47409	0.81143	0.83872	0.81667	0.96394	0	0	xours175	0.63555	0.65266	0.46715	0.80925	0.83892	0.81667	0.96396	0	0
50-50	en	ours	dissect	svd	500	lemmapos	4	0.65388	0.66256	0.47128	0.81818	0.85605	0.86667	0.97073	0	0	xours175	0.64756	0.65954	0.46917	0.82081	0.85705	0.86667	0.97092	0	0
50-50	en	ours	dissect	svd	500	lemmapos	8	0.67252	0.67247	0.47777	0.8	0.86201	0.86667	0.97252	0	0	xours175	0.66641	0.66845	0.47438	0.8022	0.86169	0.86667	0.97243	0	0
50-50	en	ours	dissect	svd	500	surface	1	0.68426	0.69397	0.50085	0.83158	0.8606	0.86667	0.97112	0	0	xours175	0.67935	0.68978	0.4973	0.82979	0.8613	0.86667	0.97126	0	0
50-50	en	ours	dissect	svd	500	surface	4	0.68468	0.68697	0.48893	0.80412	0.85417	0.85	0.97047	0	0	xours175	0.67778	0.68093	0.4835	0.80208	0.85407	0.85	0.97044	0	0
50-50	en	ours	dissect	svd	500	surface	8	0.68651	0.68883	0.4895	0.8	0.86052	0.86667	0.97219	0	0	xours175	0.67971	0.68374	0.48516	0.80198	0.86043	0.86667	0.97216	0	0
50-50	en	ours	dissect	svd	500	surface@stoppy	1	0.63493	0.63686	0.4504	0.81675	0.86042	0.88333	0.97129	0	0	xours175	0.6297	0.63414	0.448	0.81915	0.86194	0.88333	0.97158	0	0
50-50	en	ours	dissect	svd	500	surface@stoppy	4	0.67456	0.67856	0.48159	0.81026	0.85417	0.85	0.97002	0	0	xours175	0.66833	0.67351	0.47732	0.80829	0.85423	0.85	0.97004	0	0
50-50	en	ours	dissect	svd	500	surface@stoppy	8	0.68358	0.68684	0.48987	0.80829	0.85466	0.83333	0.97046	0	0	xours175	0.67634	0.68068	0.48463	0.80628	0.8545	0.83333	0.97042	0	0
50-50	en	ours	glove.avg	default	250	lemma	1	0.54333	0.55245	0.3751	0.76923	0.84182	0.83333	0.96938	0	0	xours175	0.53965	0.55495	0.37543	0.77528	0.84821	0.85	0.97074	0	0
50-50	en	ours	glove.avg	default	250	lemma	4	0.61964	0.61607	0.42741	0.77005	0.85884	0.88333	0.97319	0	0	xours175	0.61516	0.61312	0.42342	0.77174	0.86151	0.88333	0.97371	0	0
50-50	en	ours	glove.avg	default	250	lemma	8	0.62914	0.62994	0.43748	0.78534	0.86547	0.9	0.97447	0	0	xours175	0.62505	0.62695	0.43301	0.78723	0.86806	0.9	0.97498	0	0
50-50	en	ours	glove.avg	default	250	lemmapos	1	0.54684	0.55085	0.37298	0.75294	0.84083	0.85	0.9694	3	0	xours175	0.54532	0.5542	0.37385	0.75904	0.84703	0.83333	0.9707	3	0
50-50	en	ours	glove.avg	default	250	lemmapos	4	0.63425	0.62484	0.43238	0.7772	0.86155	0.88333	0.97368	3	0	xours175	0.63207	0.62589	0.43196	0.78307	0.86541	0.88333	0.97444	3	0
50-50	en	ours	glove.avg	default	250	lemmapos	8	0.65417	0.64838	0.45669	0.79188	0.86674	0.86667	0.97478	3	0	xours175	0.64979	0.64595	0.454	0.79793	0.8684	0.86667	0.9751	3	0
50-50	en	ours	glove.avg	default	250	surface	1	0.54632	0.53366	0.36834	0.76684	0.83844	0.83333	0.9685	0	2	xours175	0.54361	0.53595	0.36899	0.77895	0.84399	0.83333	0.96962	0	0
50-50	en	ours	glove.avg	default	250	surface	4	0.56552	0.57648	0.39331	0.77457	0.84332	0.85	0.96925	0	2	xours175	0.56381	0.5784	0.3937	0.78613	0.84858	0.85	0.97031	0	0
50-50	en	ours	glove.avg	default	250	surface	8	0.02071	0.07709	0.05393	0.66667	0.49551	0.53333	0.75125	0	2	xours175	0.02232	0.07997	0.05568	0.67424	0.50285	0.55	0.75292	0	0
50-50	en	ours	glove.avg	default	250	surface@stoppy	1	0.5072	0.47879	0.32798	0.72626	0.80617	0.86667	0.96071	0	5	xours175	0.51377	0.49062	0.3373	0.73988	0.81345	0.86667	0.96226	0	0
50-50	en	ours	glove.avg	default	250	surface@stoppy	4	0.56157	0.55558	0.38006	0.78107	0.85338	0.85	0.97168	0	5	xours175	0.56885	0.56364	0.38621	0.78571	0.85862	0.85	0.97274	0	0
50-50	en	ours	glove.avg	default	250	surface@stoppy	8	0.51259	0.52825	0.35868	0.75145	0.83602	0.88333	0.96731	0	5	xours175	0.51923	0.53588	0.36451	0.75581	0.84138	0.88333	0.96842	0	0
50-50	en	ours	glove.avg	default	750	lemma	1	0.54986	0.563	0.38206	0.76684	0.84224	0.85	0.96954	0	0	xours175	0.54627	0.56594	0.38305	0.77249	0.84727	0.86667	0.97053	0	0
50-50	en	ours	glove.avg	default	750	lemma	4	0.60509	0.6024	0.41275	0.78756	0.85636	0.88333	0.97245	0	0	xours175	0.59939	0.5974	0.40724	0.78947	0.85794	0.88333	0.97276	0	0
50-50	en	ours	glove.avg	default	750	lemma	8	0.62318	0.62395	0.43325	0.78173	0.86352	0.9	0.97415	0	0	xours175	0.61823	0.62014	0.42867	0.78351	0.86538	0.9	0.97451	0	0
50-50	en	ours	glove.avg	default	750	lemmapos	1	0.54554	0.5528	0.37634	0.76382	0.83938	0.85	0.9691	3	0	xours175	0.54321	0.55647	0.37766	0.76923	0.84434	0.83333	0.97011	3	0
50-50	en	ours	glove.avg	default	750	lemmapos	4	0.62987	0.62625	0.43375	0.77714	0.8646	0.86667	0.97442	3	0	xours175	0.62706	0.62647	0.43288	0.78363	0.86782	0.86667	0.97505	3	0
50-50	en	ours	glove.avg	default	750	lemmapos	8	0.64833	0.64428	0.44948	0.7957	0.8656	0.88333	0.97461	3	0	xours175	0.64321	0.64126	0.4469	0.8	0.86641	0.86667	0.97476	3	0
50-50	en	ours	glove.avg	default	750	surface	1	0.54456	0.54014	0.37219	0.7644	0.83587	0.83333	0.96791	0	2	xours175	0.53983	0.53905	0.37004	0.77005	0.84011	0.83333	0.96878	0	0
50-50	en	ours	glove.avg	default	750	surface	4	0.56242	0.57826	0.39779	0.78495	0.84339	0.88333	0.96932	0	2	xours175	0.5591	0.57835	0.39725	0.79781	0.84803	0.88333	0.97024	0	0
50-50	en	ours	glove.avg	default	750	surface	8	0.57671	0.58817	0.40425	0.78889	0.85078	0.86667	0.97086	0	2	xours175	0.5743	0.58935	0.40396	0.80226	0.85574	0.86667	0.97185	0	0
50-50	en	ours	glove.avg	default	750	surface@stoppy	1	0.50614	0.47526	0.32201	0.71579	0.80772	0.85	0.96161	0	5	xours175	0.5127	0.4876	0.33204	0.72826	0.81476	0.85	0.96312	0	0
50-50	en	ours	glove.avg	default	750	surface@stoppy	4	0.53843	0.52918	0.36117	0.78363	0.84089	0.83333	0.96887	0	5	xours175	0.54541	0.53589	0.36622	0.78824	0.84569	0.83333	0.96985	0	0
50-50	en	ours	glove.avg	default	750	surface@stoppy	8	0.50152	0.52645	0.35875	0.74872	0.82731	0.85	0.9653	0	5	xours175	0.50801	0.53572	0.36446	0.7619	0.83364	0.85	0.96661	0	0
50-50	en	ours	glove.avg	default	500	lemma	1	0.54727	0.56508	0.38516	0.76	0.84403	0.83333	0.97003	0	0	xours175	0.54423	0.5692	0.38687	0.76531	0.85086	0.85	0.97144	0	0
50-50	en	ours	glove.avg	default	500	lemma	4	0.61581	0.61648	0.4258	0.79167	0.8633	0.9	0.97392	0	0	xours175	0.61011	0.61164	0.42013	0.79365	0.86444	0.9	0.97413	0	0
50-50	en	ours	glove.avg	default	500	lemma	8	0.62162	0.62316	0.43201	0.78173	0.86106	0.88333	0.97364	0	0	xours175	0.61728	0.62082	0.42841	0.78351	0.86412	0.88333	0.97424	0	0
50-50	en	ours	glove.avg	default	500	lemmapos	1	0.54841	0.55297	0.37256	0.76142	0.8395	0.83333	0.9691	3	0	xours175	0.5458	0.55647	0.37353	0.76684	0.84491	0.85	0.97019	3	0
50-50	en	ours	glove.avg	default	500	lemmapos	4	0.63489	0.63183	0.43731	0.78173	0.86801	0.88333	0.97516	3	0	xours175	0.63243	0.63291	0.43691	0.78824	0.87172	0.88333	0.97589	3	0
50-50	en	ours	glove.avg	default	500	lemmapos	8	0.6504	0.64581	0.45189	0.78857	0.86611	0.88333	0.97472	3	0	xours175	0.64599	0.64355	0.44984	0.79096	0.86767	0.86667	0.97502	3	0
50-50	en	ours	glove.avg	default	500	surface	1	0.55079	0.54519	0.37728	0.77612	0.8381	0.85	0.96847	0	2	xours175	0.54679	0.54559	0.37648	0.78173	0.84319	0.85	0.9695	0	0
50-50	en	ours	glove.avg	default	500	surface	4	0.56986	0.58282	0.4001	0.78453	0.84535	0.86667	0.96977	0	2	xours175	0.56733	0.58471	0.40114	0.79775	0.85086	0.86667	0.97086	0	0
50-50	en	ours	glove.avg	default	500	surface	8	0.57762	0.58974	0.40611	0.78689	0.84668	0.86667	0.96983	0	2	xours175	0.57524	0.59133	0.40672	0.8	0.85178	0.86667	0.97084	0	0
50-50	en	ours	glove.avg	default	500	surface@stoppy	1	0.51389	0.48017	0.32686	0.72251	0.80958	0.85	0.962	0	5	xours175	0.52055	0.49217	0.33625	0.73514	0.81683	0.85	0.96355	0	0
50-50	en	ours	glove.avg	default	500	surface@stoppy	4	0.54455	0.54351	0.36999	0.77907	0.84539	0.85	0.9699	0	5	xours175	0.5516	0.55095	0.37569	0.78363	0.85056	0.85	0.97095	0	0
50-50	en	ours	glove.avg	default	500	surface@stoppy	8	0.504	0.53106	0.36042	0.73418	0.8294	0.86667	0.9651	0	5	xours175	0.51053	0.53883	0.3653	0.74595	0.83503	0.86667	0.96626	0	0
50-50	en	ours	glove.run1	default	250	lemma	1	0.54106	0.54812	0.37013	0.75978	0.8385	0.86667	0.96872	0	0	xours175	0.53795	0.55147	0.37122	0.76571	0.84532	0.86667	0.97017	0	0
50-50	en	ours	glove.run1	default	250	lemma	4	0.61751	0.6122	0.42297	0.78307	0.85858	0.9	0.97298	0	0	xours175	0.61341	0.60954	0.41897	0.78495	0.86154	0.9	0.97356	0	0
50-50	en	ours	glove.run1	default	250	lemma	8	0.63523	0.63541	0.44021	0.78534	0.86864	0.9	0.97513	0	0	xours175	0.63151	0.63234	0.43604	0.78723	0.87093	0.9	0.97557	0	0
50-50	en	ours	glove.run1	default	250	lemmapos	1	0.54916	0.55439	0.37858	0.75294	0.83972	0.83333	0.96914	3	0	xours175	0.54812	0.5587	0.38016	0.75904	0.8464	0.85	0.97054	3	0
50-50	en	ours	glove.run1	default	250	lemmapos	4	0.63861	0.62628	0.43457	0.78161	0.8642	0.88333	0.97432	3	0	xours175	0.63721	0.62785	0.4342	0.78824	0.86858	0.88333	0.97518	3	0
50-50	en	ours	glove.run1	default	250	lemmapos	8	0.65185	0.64722	0.45425	0.79381	0.86689	0.86667	0.9748	3	0	xours175	0.64741	0.64473	0.45129	0.8	0.86842	0.86667	0.97509	3	0
50-50	en	ours	glove.run1	default	250	surface	1	0.54425	0.52948	0.36312	0.76684	0.83748	0.83333	0.96831	0	2	xours175	0.54115	0.53048	0.36241	0.77895	0.84259	0.83333	0.96935	0	0
50-50	en	ours	glove.run1	default	250	surface	4	0.56578	0.57481	0.39282	0.77838	0.84263	0.85	0.96889	0	2	xours175	0.56439	0.57787	0.3941	0.79121	0.84836	0.85	0.97004	0	0
50-50	en	ours	glove.run1	default	250	surface	8	0.58573	0.59545	0.41109	0.77844	0.85152	0.86667	0.97126	0	2	xours175	0.58472	0.59937	0.41329	0.79121	0.85737	0.86667	0.97243	0	0
50-50	en	ours	glove.run1	default	250	surface@stoppy	1	0.50692	0.47875	0.32524	0.72	0.80763	0.85	0.96151	0	5	xours175	0.51349	0.48956	0.33388	0.73373	0.81413	0.85	0.9629	0	0
50-50	en	ours	glove.run1	default	250	surface@stoppy	4	0.56068	0.55218	0.37981	0.77095	0.85262	0.86667	0.97161	0	5	xours175	0.56794	0.56199	0.38739	0.78613	0.85882	0.86667	0.97286	0	0
50-50	en	ours	glove.run1	default	250	surface@stoppy	8	0.56309	0.56977	0.38777	0.77844	0.84948	0.86667	0.97064	0	5	xours175	0.57039	0.57823	0.39397	0.78313	0.85507	0.86667	0.97177	0	0
50-50	en	ours	glove.run1	default	750	lemma	1	0.54929	0.56745	0.38926	0.76571	0.84399	0.85	0.96984	0	0	xours175	0.54648	0.57135	0.39094	0.77193	0.85058	0.86667	0.97122	0	0
50-50	en	ours	glove.run1	default	750	lemma	4	0.61275	0.61386	0.4217	0.78534	0.8618	0.9	0.9737	0	0	xours175	0.6075	0.60985	0.41684	0.78723	0.86349	0.9	0.97403	0	0
50-50	en	ours	glove.run1	default	750	lemma	8	0.61918	0.61669	0.42513	0.78571	0.86081	0.88333	0.97345	0	0	xours175	0.61335	0.61172	0.41995	0.78756	0.86197	0.88333	0.97368	0	0
50-50	en	ours	glove.run1	default	750	lemmapos	1	0.54891	0.55792	0.37932	0.77551	0.84099	0.83333	0.96943	3	0	xours175	0.54532	0.56115	0.38095	0.78125	0.84529	0.83333	0.97028	3	0
50-50	en	ours	glove.run1	default	750	lemmapos	4	0.63358	0.63386	0.44009	0.78173	0.86543	0.88333	0.97459	3	0	xours175	0.63051	0.63359	0.43893	0.78756	0.86812	0.88333	0.97512	3	0
50-50	en	ours	glove.run1	default	750	lemmapos	8	0.65095	0.65017	0.45475	0.79144	0.86822	0.88333	0.97518	3	0	xours175	0.64668	0.64789	0.45287	0.79781	0.86958	0.88333	0.97543	3	0
50-50	en	ours	glove.run1	default	750	surface	1	0.54894	0.54638	0.37654	0.76	0.83739	0.83333	0.96838	0	2	xours175	0.54441	0.54654	0.37543	0.76757	0.84224	0.83333	0.96936	0	0
50-50	en	ours	glove.run1	default	750	surface	4	0.56545	0.58027	0.39791	0.77838	0.84497	0.86667	0.96954	0	2	xours175	0.56205	0.58055	0.39659	0.79121	0.84971	0.86667	0.97049	0	0
50-50	en	ours	glove.run1	default	750	surface	8	0.57663	0.59231	0.40823	0.79012	0.85107	0.88333	0.9707	0	2	xours175	0.57403	0.59414	0.40869	0.8	0.85603	0.88333	0.97168	0	0
50-50	en	ours	glove.run1	default	750	surface@stoppy	1	0.51337	0.48261	0.32785	0.71795	0.80976	0.85	0.96198	0	5	xours175	0.52002	0.49458	0.33756	0.73016	0.81666	0.85	0.96345	0	0
50-50	en	ours	glove.run1	default	750	surface@stoppy	4	0.54343	0.54199	0.37061	0.7619	0.84287	0.88333	0.96949	0	5	xours175	0.55047	0.55177	0.37806	0.77596	0.84918	0.88333	0.97078	0	0
50-50	en	ours	glove.run1	default	750	surface@stoppy	8	0.5531	0.56097	0.38001	0.77381	0.85295	0.86667	0.9718	0	5	xours175	0.56026	0.56938	0.38629	0.78212	0.85848	0.86667	0.97292	0	0
50-50	en	ours	glove.run1	default	500	lemma	1	0.54986	0.56418	0.38417	0.76836	0.84543	0.86667	0.97022	0	0	xours175	0.54597	0.56753	0.38542	0.77457	0.85103	0.88333	0.97137	0	0
50-50	en	ours	glove.run1	default	500	lemma	4	0.61354	0.61153	0.42369	0.77895	0.85883	0.9	0.97294	0	0	xours175	0.60801	0.60752	0.41895	0.78075	0.86093	0.9	0.97335	0	0
50-50	en	ours	glove.run1	default	500	lemma	8	0.62597	0.62819	0.43636	0.78889	0.86323	0.9	0.97399	0	0	xours175	0.62148	0.62515	0.43275	0.79096	0.86555	0.9	0.97445	0	0
50-50	en	ours	glove.run1	default	500	lemmapos	1	0.54558	0.55738	0.37758	0.76142	0.84299	0.83333	0.96987	3	0	xours175	0.54257	0.56036	0.37832	0.76684	0.84804	0.83333	0.97089	3	0
50-50	en	ours	glove.run1	default	500	lemmapos	4	0.6398	0.63202	0.43748	0.7772	0.86583	0.88333	0.97472	3	0	xours175	0.63728	0.63219	0.43643	0.78307	0.86893	0.88333	0.97533	3	0
50-50	en	ours	glove.run1	default	500	lemmapos	8	0.65449	0.6513	0.45682	0.79167	0.86983	0.88333	0.97548	3	0	xours175	0.64976	0.64886	0.45452	0.79787	0.87116	0.88333	0.97573	3	0
50-50	en	ours	glove.run1	default	500	surface	1	0.54361	0.54619	0.37741	0.77487	0.83881	0.83333	0.96869	0	2	xours175	0.53869	0.54505	0.37516	0.78075	0.84329	0.83333	0.9696	0	0
50-50	en	ours	glove.run1	default	500	surface	4	0.57066	0.58383	0.40134	0.78453	0.84442	0.86667	0.96947	0	2	xours175	0.56806	0.5845	0.4018	0.79775	0.84948	0.86667	0.97048	0	0
50-50	en	ours	glove.run1	default	500	surface	8	0.57446	0.58578	0.40338	0.78161	0.8466	0.86667	0.96969	0	2	xours175	0.572	0.58624	0.40291	0.79348	0.8512	0.86667	0.9706	0	0
50-50	en	ours	glove.run1	default	500	surface@stoppy	1	0.50583	0.4673	0.31629	0.71698	0.8063	0.85	0.96117	0	5	xours175	0.51239	0.47976	0.32573	0.72251	0.81365	0.85	0.96275	0	0
50-50	en	ours	glove.run1	default	500	surface@stoppy	4	0.54951	0.54524	0.3726	0.76289	0.84557	0.88333	0.96998	0	5	xours175	0.55663	0.55507	0.37977	0.7766	0.85178	0.88333	0.97124	0	0
50-50	en	ours	glove.run1	default	500	surface@stoppy	8	0.55027	0.55854	0.37864	0.77193	0.84821	0.85	0.97074	0	5	xours175	0.5574	0.56676	0.3851	0.78212	0.8537	0.85	0.97185	0	0
50-50	en	ours	glove.run2	default	250	lemma	1	0.54333	0.55245	0.3751	0.76923	0.84182	0.83333	0.96938	0	0	xours175	0.53965	0.55495	0.37543	0.77528	0.84821	0.85	0.97074	0	0
50-50	en	ours	glove.run2	default	250	lemma	4	0.61964	0.61607	0.42741	0.77005	0.85884	0.88333	0.97319	0	0	xours175	0.61516	0.61312	0.42342	0.77174	0.86151	0.88333	0.97371	0	0
50-50	en	ours	glove.run2	default	250	lemma	8	0.62914	0.62994	0.43748	0.78534	0.86547	0.9	0.97447	0	0	xours175	0.62505	0.62695	0.43301	0.78723	0.86806	0.9	0.97498	0	0
50-50	en	ours	glove.run2	default	250	lemmapos	1	0.54684	0.55085	0.37298	0.75294	0.84083	0.85	0.9694	3	0	xours175	0.54532	0.5542	0.37385	0.75904	0.84703	0.83333	0.9707	3	0
50-50	en	ours	glove.run2	default	250	lemmapos	4	0.63425	0.62484	0.43238	0.7772	0.86155	0.88333	0.97368	3	0	xours175	0.63207	0.62589	0.43196	0.78307	0.86541	0.88333	0.97444	3	0
50-50	en	ours	glove.run2	default	250	lemmapos	8	0.65417	0.64838	0.45669	0.79188	0.86674	0.86667	0.97478	3	0	xours175	0.64979	0.64595	0.454	0.79793	0.8684	0.86667	0.9751	3	0
50-50	en	ours	glove.run2	default	250	surface	1	0.54632	0.53366	0.36834	0.76684	0.83844	0.83333	0.9685	0	2	xours175	0.54361	0.53595	0.36899	0.77895	0.84399	0.83333	0.96962	0	0
50-50	en	ours	glove.run2	default	250	surface	4	0.56552	0.57648	0.39331	0.77457	0.84332	0.85	0.96925	0	2	xours175	0.56381	0.5784	0.3937	0.78613	0.84858	0.85	0.97031	0	0
50-50	en	ours	glove.run2	default	250	surface	8	0.02071	0.07709	0.05393	0.66667	0.49551	0.53333	0.75125	0	2	xours175	0.02232	0.07997	0.05568	0.67424	0.50285	0.55	0.75292	0	0
50-50	en	ours	glove.run2	default	250	surface@stoppy	1	0.5072	0.47879	0.32798	0.72626	0.80617	0.86667	0.96071	0	5	xours175	0.51377	0.49062	0.3373	0.73988	0.81345	0.86667	0.96226	0	0
50-50	en	ours	glove.run2	default	250	surface@stoppy	4	0.56157	0.55558	0.38006	0.78107	0.85338	0.85	0.97168	0	5	xours175	0.56885	0.56364	0.38621	0.78571	0.85862	0.85	0.97274	0	0
50-50	en	ours	glove.run2	default	250	surface@stoppy	8	0.51259	0.52825	0.35868	0.75145	0.83602	0.88333	0.96731	0	5	xours175	0.51923	0.53588	0.36451	0.75581	0.84138	0.88333	0.96842	0	0
50-50	en	ours	glove.run2	default	750	lemma	1	0.54986	0.563	0.38206	0.76684	0.84224	0.85	0.96954	0	0	xours175	0.54627	0.56594	0.38305	0.77249	0.84727	0.86667	0.97053	0	0
50-50	en	ours	glove.run2	default	750	lemma	4	0.60509	0.6024	0.41275	0.78756	0.85636	0.88333	0.97245	0	0	xours175	0.59939	0.5974	0.40724	0.78947	0.85794	0.88333	0.97276	0	0
50-50	en	ours	glove.run2	default	750	lemma	8	0.62318	0.62395	0.43325	0.78173	0.86352	0.9	0.97415	0	0	xours175	0.61823	0.62014	0.42867	0.78351	0.86538	0.9	0.97451	0	0
50-50	en	ours	glove.run2	default	750	lemmapos	1	0.54554	0.5528	0.37634	0.76382	0.83938	0.85	0.9691	3	0	xours175	0.54321	0.55647	0.37766	0.76923	0.84434	0.83333	0.97011	3	0
50-50	en	ours	glove.run2	default	750	lemmapos	4	0.62987	0.62625	0.43375	0.77714	0.8646	0.86667	0.97442	3	0	xours175	0.62706	0.62647	0.43288	0.78363	0.86782	0.86667	0.97505	3	0
50-50	en	ours	glove.run2	default	750	lemmapos	8	0.64833	0.64428	0.44948	0.7957	0.8656	0.88333	0.97461	3	0	xours175	0.64321	0.64126	0.4469	0.8	0.86641	0.86667	0.97476	3	0
50-50	en	ours	glove.run2	default	750	surface	1	0.54456	0.54014	0.37219	0.7644	0.83587	0.83333	0.96791	0	2	xours175	0.53983	0.53905	0.37004	0.77005	0.84011	0.83333	0.96878	0	0
50-50	en	ours	glove.run2	default	750	surface	4	0.56242	0.57826	0.39779	0.78495	0.84339	0.88333	0.96932	0	2	xours175	0.5591	0.57835	0.39725	0.79781	0.84803	0.88333	0.97024	0	0
50-50	en	ours	glove.run2	default	750	surface	8	0.57671	0.58817	0.40425	0.78889	0.85078	0.86667	0.97086	0	2	xours175	0.5743	0.58935	0.40396	0.80226	0.85574	0.86667	0.97185	0	0
50-50	en	ours	glove.run2	default	750	surface@stoppy	1	0.50614	0.47526	0.32201	0.71579	0.80772	0.85	0.96161	0	5	xours175	0.5127	0.4876	0.33204	0.72826	0.81476	0.85	0.96312	0	0
50-50	en	ours	glove.run2	default	750	surface@stoppy	4	0.53843	0.52918	0.36117	0.78363	0.84089	0.83333	0.96887	0	5	xours175	0.54541	0.53589	0.36622	0.78824	0.84569	0.83333	0.96985	0	0
50-50	en	ours	glove.run2	default	750	surface@stoppy	8	0.50152	0.52645	0.35875	0.74872	0.82731	0.85	0.9653	0	5	xours175	0.50801	0.53572	0.36446	0.7619	0.83364	0.85	0.96661	0	0
50-50	en	ours	glove.run2	default	500	lemma	1	0.54727	0.56508	0.38516	0.76	0.84403	0.83333	0.97003	0	0	xours175	0.54423	0.5692	0.38687	0.76531	0.85086	0.85	0.97144	0	0
50-50	en	ours	glove.run2	default	500	lemma	4	0.61581	0.61648	0.4258	0.79167	0.8633	0.9	0.97392	0	0	xours175	0.61011	0.61164	0.42013	0.79365	0.86444	0.9	0.97413	0	0
50-50	en	ours	glove.run2	default	500	lemma	8	0.62162	0.62316	0.43201	0.78173	0.86106	0.88333	0.97364	0	0	xours175	0.61728	0.62082	0.42841	0.78351	0.86412	0.88333	0.97424	0	0
50-50	en	ours	glove.run2	default	500	lemmapos	1	0.54841	0.55297	0.37256	0.76142	0.8395	0.83333	0.9691	3	0	xours175	0.5458	0.55647	0.37353	0.76684	0.84491	0.85	0.97019	3	0
50-50	en	ours	glove.run2	default	500	lemmapos	4	0.63489	0.63183	0.43731	0.78173	0.86801	0.88333	0.97516	3	0	xours175	0.63243	0.63291	0.43691	0.78824	0.87172	0.88333	0.97589	3	0
50-50	en	ours	glove.run2	default	500	lemmapos	8	0.6504	0.64581	0.45189	0.78857	0.86611	0.88333	0.97472	3	0	xours175	0.64599	0.64355	0.44984	0.79096	0.86767	0.86667	0.97502	3	0
50-50	en	ours	glove.run2	default	500	surface	1	0.55079	0.54519	0.37728	0.77612	0.8381	0.85	0.96847	0	2	xours175	0.54679	0.54559	0.37648	0.78173	0.84319	0.85	0.9695	0	0
50-50	en	ours	glove.run2	default	500	surface	4	0.56986	0.58282	0.4001	0.78453	0.84535	0.86667	0.96977	0	2	xours175	0.56733	0.58471	0.40114	0.79775	0.85086	0.86667	0.97086	0	0
50-50	en	ours	glove.run2	default	500	surface	8	0.57762	0.58974	0.40611	0.78689	0.84668	0.86667	0.96983	0	2	xours175	0.57524	0.59133	0.40672	0.8	0.85178	0.86667	0.97084	0	0
50-50	en	ours	glove.run2	default	500	surface@stoppy	1	0.51389	0.48017	0.32686	0.72251	0.80958	0.85	0.962	0	5	xours175	0.52055	0.49217	0.33625	0.73514	0.81683	0.85	0.96355	0	0
50-50	en	ours	glove.run2	default	500	surface@stoppy	4	0.54455	0.54351	0.36999	0.77907	0.84539	0.85	0.9699	0	5	xours175	0.5516	0.55095	0.37569	0.78363	0.85056	0.85	0.97095	0	0
50-50	en	ours	glove.run2	default	500	surface@stoppy	8	0.504	0.53106	0.36042	0.73418	0.8294	0.86667	0.9651	0	5	xours175	0.51053	0.53883	0.3653	0.74595	0.83503	0.86667	0.96626	0	0
50-50	en	ours	glove.run3	default	250	lemma	1	0.54395	0.55497	0.37634	0.7644	0.84492	0.85	0.97017	0	0	xours175	0.54168	0.55924	0.37766	0.77005	0.85254	0.86667	0.97178	0	0
50-50	en	ours	glove.run3	default	250	lemma	4	0.62022	0.61716	0.42766	0.7772	0.86018	0.9	0.97332	0	0	xours175	0.61575	0.61394	0.42407	0.78307	0.86236	0.9	0.97374	0	0
50-50	en	ours	glove.run3	default	250	lemma	8	0.63137	0.63288	0.43855	0.78756	0.86814	0.9	0.97502	0	0	xours175	0.62723	0.63011	0.43467	0.78947	0.87071	0.9	0.97553	0	0
50-50	en	ours	glove.run3	default	250	lemmapos	1	0.5492	0.55604	0.37771	0.76023	0.8419	0.81667	0.96961	3	0	xours175	0.54763	0.55964	0.37885	0.76647	0.84781	0.83333	0.97083	3	0
50-50	en	ours	glove.run3	default	250	lemmapos	4	0.63696	0.62575	0.43499	0.78075	0.86409	0.88333	0.97426	3	0	xours175	0.63603	0.62737	0.43525	0.78689	0.86847	0.88333	0.97512	3	0
50-50	en	ours	glove.run3	default	250	lemmapos	8	0.64989	0.64914	0.45475	0.78857	0.86657	0.86667	0.97476	3	0	xours175	0.64606	0.6472	0.45247	0.7907	0.86834	0.86667	0.9751	3	0
50-50	en	ours	glove.run3	default	250	surface	1	0.54195	0.5267	0.36337	0.77083	0.83496	0.83333	0.96774	0	2	xours175	0.53894	0.52896	0.36386	0.78307	0.84058	0.83333	0.96888	0	0
50-50	en	ours	glove.run3	default	250	surface	4	0.56816	0.57993	0.40127	0.78453	0.8401	0.85	0.9683	0	2	xours175	0.56655	0.58321	0.40356	0.79775	0.84579	0.85	0.96945	0	0
50-50	en	ours	glove.run3	default	250	surface	8	0.58729	0.60107	0.41543	0.78534	0.85125	0.85	0.97084	0	2	xours175	0.5858	0.6041	0.41737	0.79787	0.85671	0.85	0.97192	0	0
50-50	en	ours	glove.run3	default	250	surface@stoppy	1	0.50993	0.47696	0.32748	0.70899	0.80338	0.83333	0.96029	0	5	xours175	0.51653	0.48896	0.33704	0.72131	0.81026	0.83333	0.96177	0	0
50-50	en	ours	glove.run3	default	250	surface@stoppy	4	0.56055	0.55165	0.37695	0.77083	0.84788	0.86667	0.9706	0	5	xours175	0.56781	0.56242	0.38489	0.78495	0.85433	0.86667	0.97191	0	0
50-50	en	ours	glove.run3	default	250	surface@stoppy	8	0.56032	0.5649	0.38702	0.78107	0.84777	0.85	0.97032	0	5	xours175	0.56758	0.57337	0.39357	0.78571	0.85321	0.85	0.97142	0	0
50-50	en	ours	glove.run3	default	750	lemma	1	0.5513	0.56866	0.38864	0.7644	0.84492	0.85	0.96998	0	0	xours175	0.54719	0.57143	0.38976	0.77005	0.84981	0.86667	0.97095	0	0
50-50	en	ours	glove.run3	default	750	lemma	4	0.60521	0.60252	0.41238	0.77949	0.85847	0.9	0.97304	0	0	xours175	0.59906	0.59756	0.40724	0.78125	0.85979	0.9	0.9733	0	0
50-50	en	ours	glove.run3	default	750	lemma	8	0.61743	0.61742	0.42629	0.77778	0.86048	0.9	0.97347	0	0	xours175	0.61204	0.61378	0.42158	0.77966	0.86261	0.9	0.97388	0	0
50-50	en	ours	glove.run3	default	750	lemmapos	1	0.54891	0.55478	0.37671	0.76531	0.83976	0.85	0.96914	3	0	xours175	0.5456	0.5583	0.37832	0.77083	0.84439	0.85	0.97007	3	0
50-50	en	ours	glove.run3	default	750	lemmapos	4	0.63244	0.63121	0.43909	0.78351	0.86467	0.86667	0.9744	3	0	xours175	0.6293	0.63086	0.43788	0.78947	0.86739	0.86667	0.97493	3	0
50-50	en	ours	glove.run3	default	750	lemmapos	8	0.64582	0.64453	0.44879	0.79348	0.86623	0.86667	0.97475	3	0	xours175	0.64069	0.64162	0.4459	0.79558	0.86736	0.86667	0.97496	3	0
50-50	en	ours	glove.run3	default	750	surface	1	0.53902	0.53535	0.36858	0.75962	0.83162	0.81667	0.96711	0	2	xours175	0.53435	0.53478	0.36675	0.76471	0.83651	0.81667	0.96811	0	0
50-50	en	ours	glove.run3	default	750	surface	4	0.56858	0.58025	0.39804	0.78689	0.84611	0.86667	0.96998	0	2	xours175	0.5658	0.58157	0.39817	0.8	0.85126	0.86667	0.97101	0	0
50-50	en	ours	glove.run3	default	750	surface	8	0.57879	0.59267	0.40649	0.79348	0.85072	0.86667	0.97075	0	2	xours175	0.57617	0.59339	0.40619	0.80682	0.8553	0.86667	0.97165	0	0
50-50	en	ours	glove.run3	default	750	surface@stoppy	1	0.50307	0.46823	0.31617	0.71717	0.80567	0.83333	0.96097	0	5	xours175	0.50959	0.48085	0.32586	0.72917	0.81336	0.83333	0.96261	0	0
50-50	en	ours	glove.run3	default	750	surface@stoppy	4	0.54756	0.54493	0.3736	0.76923	0.84279	0.86667	0.96946	0	5	xours175	0.55465	0.55472	0.38121	0.78409	0.84879	0.86667	0.97068	0	0
50-50	en	ours	glove.run3	default	750	surface@stoppy	8	0.5589	0.56813	0.38466	0.77844	0.85193	0.86667	0.97147	0	5	xours175	0.56614	0.57689	0.39134	0.78313	0.85755	0.86667	0.97261	0	0
50-50	en	ours	glove.run3	default	500	lemma	1	0.55096	0.56316	0.38516	0.75789	0.84033	0.85	0.96921	0	0	xours175	0.54833	0.56737	0.38687	0.76344	0.84723	0.86667	0.97066	0	0
50-50	en	ours	glove.run3	default	500	lemma	4	0.61298	0.61289	0.42456	0.77895	0.86014	0.9	0.97323	0	0	xours175	0.60705	0.6087	0.41973	0.78075	0.86203	0.9	0.9736	0	0
50-50	en	ours	glove.run3	default	500	lemma	8	0.62776	0.62802	0.43574	0.78022	0.86285	0.9	0.97397	0	0	xours175	0.62285	0.62432	0.43117	0.78212	0.8649	0.9	0.97437	0	0
50-50	en	ours	glove.run3	default	500	lemmapos	1	0.55059	0.55601	0.37803	0.76289	0.84227	0.81667	0.96975	3	0	xours175	0.54884	0.55979	0.37906	0.76842	0.84807	0.83333	0.97095	3	0
50-50	en	ours	glove.run3	default	500	lemmapos	4	0.64061	0.63384	0.43922	0.77895	0.86694	0.88333	0.97494	3	0	xours175	0.63817	0.63431	0.43854	0.78495	0.87024	0.88333	0.97559	3	0
50-50	en	ours	glove.run3	default	500	lemmapos	8	0.65509	0.64954	0.455	0.79144	0.86889	0.88333	0.97529	3	0	xours175	0.65038	0.64689	0.45313	0.79781	0.87015	0.88333	0.97553	3	0
50-50	en	ours	glove.run3	default	500	surface	1	0.55188	0.54705	0.3789	0.78392	0.83663	0.85	0.96816	0	2	xours175	0.54763	0.54813	0.37832	0.78974	0.84189	0.85	0.96924	0	0
50-50	en	ours	glove.run3	default	500	surface	4	0.57109	0.58105	0.39953	0.78919	0.84348	0.85	0.96941	0	2	xours175	0.56901	0.58279	0.39988	0.8022	0.8487	0.85	0.97045	0	0
50-50	en	ours	glove.run3	default	500	surface	8	0.57944	0.59503	0.41109	0.78351	0.85139	0.86667	0.97114	0	2	xours175	0.5773	0.59693	0.41198	0.79581	0.85641	0.86667	0.97214	0	0
50-50	en	ours	glove.run3	default	500	surface@stoppy	1	0.50551	0.46758	0.31555	0.70647	0.80758	0.85	0.96165	0	5	xours175	0.51206	0.48083	0.3256	0.71795	0.81538	0.85	0.96333	0	0
50-50	en	ours	glove.run3	default	500	surface@stoppy	4	0.54473	0.53503	0.36539	0.76757	0.84055	0.86667	0.96897	0	5	xours175	0.55179	0.54543	0.37346	0.78212	0.84747	0.86667	0.97038	0	0
50-50	en	ours	glove.run3	default	500	surface@stoppy	8	0.55461	0.5648	0.3828	0.77647	0.84839	0.86667	0.97063	0	5	xours175	0.56179	0.57268	0.38831	0.78107	0.85369	0.86667	0.97171	0	0

## Sheet: en-farahmand
weight	language	dataset	model	submodel	dimensions	lemmatype	window	pearson	spearman	kendall	bf1	avgprec	prec@	ndcg	misssingle	misscompound	dataset	pearson	spearman	kendall	bf1	avgprec	prec@	ndcg	misssingle	misscompound
50-50	en	farahmand	word2vec.avg	cbow	250	lemma	1	0.327937	0.296127	0.232853	0.460127	0.381253	0.453333	0.811367	0	20	xfarahmand913	0.39883	0.35982	0.282123	0.499973	0.477953	0.546667	0.867973	0	0
50-50	en	farahmand	word2vec.avg	cbow	250	lemma	4	0.348387	0.30832	0.242367	0.464913	0.401097	0.46	0.84106	0	20	xfarahmand913	0.418833	0.37288	0.292153	0.507613	0.481687	0.573333	0.87226	0	0
50-50	en	farahmand	word2vec.avg	cbow	250	lemma	8	0.339943	0.30361	0.23888	0.453877	0.3901	0.44	0.834777	0	20	xfarahmand913	0.41214	0.369617	0.289787	0.49485	0.470937	0.523333	0.867787	0	0
50-50	en	farahmand	word2vec.avg	cbow	250	lemmapos	1	0.33255	0.298493	0.236203	0.45153	0.374587	0.473333	0.802173	5	15	xfarahmand913	0.41488	0.370467	0.29226	0.497603	0.48703	0.576667	0.874863	15	0
50-50	en	farahmand	word2vec.avg	cbow	250	lemmapos	4	0.35137	0.316917	0.250443	0.45765	0.37966	0.473333	0.805717	5	15	xfarahmand913	0.43594	0.389437	0.306853	0.50138	0.4848	0.623333	0.86965	15	0
50-50	en	farahmand	word2vec.avg	cbow	250	lemmapos	8	0.350823	0.315037	0.248797	0.45356	0.384113	0.473333	0.810077	5	15	xfarahmand913	0.434157	0.387663	0.305397	0.498603	0.48547	0.62	0.87225	15	0
50-50	en	farahmand	word2vec.avg	cbow	250	surface	1	0.29853	0.27154	0.214237	0.434677	0.358503	0.416667	0.81857	0	20	xfarahmand913	0.36308	0.3275	0.257817	0.47363	0.445227	0.513333	0.86031	0	0
50-50	en	farahmand	word2vec.avg	cbow	250	surface	4	0.307143	0.278083	0.218547	0.420967	0.365473	0.423333	0.8264	0	20	xfarahmand913	0.372783	0.336287	0.26367	0.45759	0.44162	0.516667	0.85881	0	0
50-50	en	farahmand	word2vec.avg	cbow	250	surface	8	0.30721	0.275393	0.216957	0.42876	0.369967	0.43	0.829277	0	20	xfarahmand913	0.37218	0.336793	0.264697	0.46838	0.439213	0.493333	0.856997	0	0
50-50	en	farahmand	word2vec.avg	cbow	250	surface@stoppy	1	0.303093	0.272477	0.21476	0.434067	0.375207	0.47	0.812283	0	20	xfarahmand913	0.364307	0.331177	0.260297	0.471453	0.453203	0.553333	0.864847	0	0
50-50	en	farahmand	word2vec.avg	cbow	250	surface@stoppy	4	0.316437	0.276397	0.217677	0.442737	0.385533	0.456667	0.832657	0	20	xfarahmand913	0.38169	0.338897	0.26635	0.487163	0.45933	0.543333	0.866053	0	0
50-50	en	farahmand	word2vec.avg	cbow	250	surface@stoppy	8	0.319897	0.280123	0.22028	0.438433	0.391393	0.48	0.838527	0	20	xfarahmand913	0.384157	0.340673	0.267313	0.481783	0.463053	0.566667	0.867867	0	0
50-50	en	farahmand	word2vec.avg	cbow	750	lemma	1	0.33291	0.302697	0.238413	0.466687	0.410603	0.496667	0.837443	0	20	xfarahmand913	0.392147	0.36277	0.28509	0.504983	0.50158	0.6	0.88119	0	0
50-50	en	farahmand	word2vec.avg	cbow	750	lemma	4	0.32333	0.28303	0.22216	0.461507	0.400343	0.476667	0.842683	0	20	xfarahmand913	0.387573	0.347243	0.27207	0.502457	0.478847	0.576667	0.87167	0	0
50-50	en	farahmand	word2vec.avg	cbow	750	lemma	8	0.318923	0.2834	0.22253	0.45685	0.386027	0.453333	0.826297	0	20	xfarahmand913	0.38584	0.34857	0.273087	0.500733	0.471077	0.566667	0.868937	0	0
50-50	en	farahmand	word2vec.avg	cbow	750	lemmapos	1	0.328323	0.299993	0.23702	0.447397	0.38364	0.49	0.80984	5	15	xfarahmand913	0.395963	0.36492	0.28776	0.48835	0.485347	0.61	0.872373	15	0
50-50	en	farahmand	word2vec.avg	cbow	750	lemmapos	4	0.32941	0.29789	0.235553	0.450127	0.37629	0.49	0.806293	5	15	xfarahmand913	0.405873	0.36756	0.28983	0.491947	0.48381	0.613333	0.871523	15	0
50-50	en	farahmand	word2vec.avg	cbow	750	lemmapos	8	0.3191	0.28599	0.22582	0.43862	0.3728	0.46	0.803013	5	15	xfarahmand913	0.396127	0.357523	0.281537	0.48674	0.47833	0.616667	0.87173	15	0
50-50	en	farahmand	word2vec.avg	cbow	750	surface	1	0.283577	0.26309	0.207167	0.428093	0.371717	0.45	0.826883	0	33.3333	xfarahmand913	0.33679	0.314653	0.247083	0.464097	0.454357	0.556667	0.86451	0	0
50-50	en	farahmand	word2vec.avg	cbow	750	surface	4	0.281153	0.255907	0.200673	0.420637	0.363343	0.426667	0.825347	0	20	xfarahmand913	0.341007	0.311817	0.244	0.45954	0.438557	0.53	0.857187	0	0
50-50	en	farahmand	word2vec.avg	cbow	750	surface	8	0.262857	0.236127	0.185417	0.419723	0.35426	0.42	0.82097	0	20	xfarahmand913	0.323237	0.29413	0.23052	0.45934	0.424663	0.476667	0.85195	0	0
50-50	en	farahmand	word2vec.avg	cbow	750	surface@stoppy	1	0.282547	0.261257	0.20566	0.42545	0.381883	0.466667	0.819863	0	20	xfarahmand913	0.33552	0.317057	0.248883	0.464523	0.455103	0.55	0.866383	0	0
50-50	en	farahmand	word2vec.avg	cbow	750	surface@stoppy	4	0.284413	0.253363	0.198587	0.431147	0.38353	0.46	0.83362	0	20	xfarahmand913	0.344123	0.313713	0.245493	0.476717	0.457193	0.556667	0.86655	0	0
50-50	en	farahmand	word2vec.avg	cbow	750	surface@stoppy	8	0.271673	0.242407	0.18992	0.416023	0.37217	0.456667	0.831257	0	20	xfarahmand913	0.330793	0.30104	0.235357	0.45766	0.442967	0.52	0.861783	0	0
50-50	en	farahmand	word2vec.avg	cbow	500	lemma	1	0.323003	0.289707	0.227713	0.465077	0.389867	0.466667	0.82084	0	27	xfarahmand913	0.38797	0.353277	0.277173	0.508297	0.48774	0.583333	0.87552	0	0
50-50	en	farahmand	word2vec.avg	cbow	500	lemma	4	0.326757	0.285117	0.223927	0.464207	0.392603	0.456667	0.836927	0	27	xfarahmand913	0.396047	0.35225	0.275867	0.5055	0.477873	0.586667	0.87107	0	0
50-50	en	farahmand	word2vec.avg	cbow	500	lemma	8	0.320047	0.281047	0.220803	0.45453	0.382287	0.443333	0.830833	0	27	xfarahmand913	0.389923	0.347797	0.272563	0.496557	0.466693	0.543333	0.867557	0	0
50-50	en	farahmand	word2vec.avg	cbow	500	lemmapos	1	0.328847	0.295163	0.232917	0.446243	0.387737	0.5	0.814573	5	15	xfarahmand913	0.401433	0.362853	0.285773	0.488537	0.49285	0.603333	0.87735	15	0
50-50	en	farahmand	word2vec.avg	cbow	500	lemmapos	4	0.33873	0.30289	0.239583	0.45158	0.37809	0.486667	0.804013	5	15	xfarahmand913	0.42025	0.37432	0.29521	0.49672	0.48796	0.616667	0.872453	15	0
50-50	en	farahmand	word2vec.avg	cbow	500	lemmapos	8	0.329727	0.294283	0.23261	0.445033	0.373603	0.45	0.80611	5	15	xfarahmand913	0.410513	0.36703	0.289197	0.491673	0.481107	0.61	0.872407	15	0
50-50	en	farahmand	word2vec.avg	cbow	500	surface	1	0.28191	0.25927	0.204273	0.424887	0.357423	0.413333	0.814087	0	33.3333	xfarahmand913	0.33984	0.31343	0.246343	0.462153	0.44383	0.533333	0.85922	0	0
50-50	en	farahmand	word2vec.avg	cbow	500	surface	4	0.28534	0.25795	0.202783	0.422473	0.355803	0.41	0.820633	0	33.3333	xfarahmand913	0.348307	0.315673	0.24755	0.459697	0.431193	0.51	0.85296	0	0
50-50	en	farahmand	word2vec.avg	cbow	500	surface	8	0.271	0.242563	0.190637	0.417233	0.34872	0.4	0.81493	0	33.3333	xfarahmand913	0.333007	0.30217	0.236987	0.45736	0.417257	0.486667	0.843583	0	0
50-50	en	farahmand	word2vec.avg	cbow	500	surface@stoppy	1	0.288157	0.26432	0.207953	0.42637	0.37504	0.476667	0.812977	0	20	xfarahmand913	0.34366	0.321017	0.25189	0.463897	0.44798	0.536667	0.863393	0	0
50-50	en	farahmand	word2vec.avg	cbow	500	surface@stoppy	4	0.290623	0.25611	0.201153	0.43399	0.37827	0.436667	0.83177	0	20	xfarahmand913	0.352833	0.317867	0.249173	0.480513	0.451777	0.546667	0.864247	0	0
50-50	en	farahmand	word2vec.avg	cbow	500	surface@stoppy	8	0.292997	0.25947	0.203497	0.43063	0.379403	0.463333	0.831003	0	20	xfarahmand913	0.35512	0.319557	0.250053	0.47464	0.453537	0.546667	0.865193	0	0
50-50	en	farahmand	word2vec.avg	skipgram	250	lemma	1	0.32907	0.296777	0.233383	0.455487	0.382547	0.46	0.81327	0	20	xfarahmand913	0.39905	0.360393	0.282567	0.495217	0.477883	0.563333	0.868147	0	0
50-50	en	farahmand	word2vec.avg	skipgram	250	lemma	4	0.341807	0.300747	0.23633	0.45788	0.394907	0.456667	0.837643	0	20	xfarahmand913	0.41265	0.36615	0.286787	0.499657	0.477107	0.573333	0.870087	0	0
50-50	en	farahmand	word2vec.avg	skipgram	250	lemma	8	0.341013	0.30453	0.239537	0.45397	0.39078	0.436667	0.835317	0	20	xfarahmand913	0.41331	0.37091	0.290763	0.495377	0.471637	0.533333	0.867597	0	0
50-50	en	farahmand	word2vec.avg	skipgram	250	lemmapos	1	0.332063	0.296247	0.23429	0.449727	0.375483	0.466667	0.804103	5	15	xfarahmand913	0.41369	0.369087	0.291	0.496847	0.483763	0.596667	0.872753	15	0
50-50	en	farahmand	word2vec.avg	skipgram	250	lemmapos	4	0.34994	0.31625	0.250007	0.456407	0.377917	0.463333	0.80275	5	15	xfarahmand913	0.43601	0.389427	0.306953	0.501317	0.48551	0.626667	0.870207	15	0
50-50	en	farahmand	word2vec.avg	skipgram	250	lemmapos	8	0.353983	0.319387	0.25228	0.458777	0.38638	0.466667	0.812547	5	15	xfarahmand913	0.43737	0.39177	0.308633	0.502617	0.487643	0.63	0.87306	15	0
50-50	en	farahmand	word2vec.avg	skipgram	250	surface	1	0.304243	0.276377	0.218	0.43595	0.362843	0.443333	0.82221	0	20	xfarahmand913	0.367987	0.332997	0.26201	0.476347	0.447767	0.52	0.862323	0	0
50-50	en	farahmand	word2vec.avg	skipgram	250	surface	4	0.305507	0.27453	0.215677	0.423617	0.365647	0.42	0.827077	0	20	xfarahmand913	0.371317	0.33334	0.261257	0.459997	0.442723	0.5	0.85928	0	0
50-50	en	farahmand	word2vec.avg	skipgram	250	surface	8	0.303217	0.271083	0.213597	0.424123	0.366143	0.41	0.8265	0	20	xfarahmand913	0.368097	0.33241	0.261247	0.464133	0.43641	0.513333	0.85492	0	0
50-50	en	farahmand	word2vec.avg	skipgram	250	surface@stoppy	1	0.300587	0.2693	0.212327	0.434677	0.37279	0.463333	0.80986	0	20	xfarahmand913	0.362073	0.32817	0.258033	0.47271	0.451387	0.553333	0.863613	0	0
50-50	en	farahmand	word2vec.avg	skipgram	250	surface@stoppy	4	0.31644	0.275947	0.21736	0.440837	0.384473	0.436667	0.831167	0	20	xfarahmand913	0.381077	0.338533	0.266153	0.48445	0.457407	0.54	0.8653	0	0
50-50	en	farahmand	word2vec.avg	skipgram	250	surface@stoppy	8	0.32428	0.28361	0.223007	0.439517	0.394803	0.476667	0.8403	0	20	xfarahmand913	0.388433	0.344437	0.270173	0.481563	0.46752	0.57	0.869507	0	0
50-50	en	farahmand	word2vec.avg	skipgram	750	lemma	1	0.323863	0.294903	0.23202	0.454163	0.40379	0.503333	0.826493	0	27	xfarahmand913	0.382873	0.355333	0.27904	0.491527	0.49688	0.62	0.87945	0	0
50-50	en	farahmand	word2vec.avg	skipgram	750	lemma	4	0.323583	0.284323	0.223117	0.465563	0.399677	0.493333	0.842027	0	27	xfarahmand913	0.38816	0.34845	0.272813	0.509513	0.480927	0.566667	0.872353	0	0
50-50	en	farahmand	word2vec.avg	skipgram	750	lemma	8	0.31748	0.280453	0.220057	0.45405	0.384987	0.456667	0.828353	0	20	xfarahmand913	0.38393	0.345843	0.270733	0.496793	0.467633	0.53	0.867183	0	0
50-50	en	farahmand	word2vec.avg	skipgram	750	lemmapos	1	0.32842	0.29882	0.236247	0.442863	0.389757	0.51	0.813157	5	15	xfarahmand913	0.39622	0.363747	0.286897	0.48484	0.492363	0.6	0.87595	15	0
50-50	en	farahmand	word2vec.avg	skipgram	750	lemmapos	4	0.33113	0.297653	0.23528	0.45247	0.37994	0.516667	0.806543	5	15	xfarahmand913	0.407057	0.367077	0.289433	0.493073	0.484627	0.613333	0.87004	15	0
50-50	en	farahmand	word2vec.avg	skipgram	750	lemmapos	8	0.32866	0.29446	0.232673	0.441867	0.37977	0.48	0.808127	5	15	xfarahmand913	0.40529	0.365093	0.28771	0.489067	0.485853	0.623333	0.874233	15	0
50-50	en	farahmand	word2vec.avg	skipgram	750	surface	1	0.285493	0.268857	0.212057	0.432877	0.368743	0.446667	0.823247	0	33.3333	xfarahmand913	0.339217	0.319757	0.251483	0.468007	0.453107	0.54	0.86298	0	0
50-50	en	farahmand	word2vec.avg	skipgram	750	surface	4	0.270733	0.24619	0.19294	0.415	0.354437	0.41	0.82197	0	33.3333	xfarahmand913	0.330713	0.302653	0.23671	0.451067	0.429537	0.5	0.854687	0	0
50-50	en	farahmand	word2vec.avg	skipgram	750	surface	8	0.27276	0.244527	0.192297	0.419957	0.362297	0.413333	0.824977	0	20	xfarahmand913	0.33262	0.302887	0.23759	0.460537	0.429623	0.493333	0.85232	0	0
50-50	en	farahmand	word2vec.avg	skipgram	750	surface@stoppy	1	0.278817	0.258273	0.20332	0.432183	0.37561	0.456667	0.816477	0	20	xfarahmand913	0.331517	0.314783	0.247167	0.473393	0.44953	0.54	0.864407	0	0
50-50	en	farahmand	word2vec.avg	skipgram	750	surface@stoppy	4	0.283947	0.253783	0.19912	0.433733	0.385113	0.45	0.834843	0	20	xfarahmand913	0.342897	0.313257	0.245347	0.478363	0.459023	0.563333	0.867643	0	0
50-50	en	farahmand	word2vec.avg	skipgram	750	surface@stoppy	8	0.281313	0.25243	0.197873	0.423593	0.38058	0.463333	0.835573	0	20	xfarahmand913	0.33982	0.309607	0.24218	0.466687	0.449633	0.533333	0.863633	0	0
50-50	en	farahmand	word2vec.avg	skipgram	500	lemma	1	0.336367	0.302093	0.237583	0.473093	0.406613	0.506667	0.82885	0	27	xfarahmand913	0.400293	0.364667	0.2862	0.513287	0.505673	0.603333	0.881793	0	0
50-50	en	farahmand	word2vec.avg	skipgram	500	lemma	4	0.32728	0.2846	0.22339	0.469603	0.394203	0.443333	0.83916	0	27	xfarahmand913	0.39595	0.35141	0.27515	0.51145	0.47693	0.576667	0.8701	0	0
50-50	en	farahmand	word2vec.avg	skipgram	500	lemma	8	0.325393	0.287033	0.22556	0.463183	0.386967	0.453333	0.834303	0	27	xfarahmand913	0.39509	0.35407	0.277543	0.505443	0.469733	0.546667	0.867697	0	0
50-50	en	farahmand	word2vec.avg	skipgram	500	lemmapos	1	0.327737	0.29507	0.23302	0.445573	0.385277	0.49	0.80862	5	15	xfarahmand913	0.40143	0.363587	0.28655	0.4891	0.495313	0.61	0.87826	15	0
50-50	en	farahmand	word2vec.avg	skipgram	500	lemmapos	4	0.338667	0.303743	0.24022	0.451617	0.375563	0.48	0.804603	5	15	xfarahmand913	0.419747	0.37532	0.296023	0.496777	0.48346	0.613333	0.871007	15	0
50-50	en	farahmand	word2vec.avg	skipgram	500	lemmapos	8	0.339063	0.304507	0.240597	0.448123	0.382283	0.48	0.809363	5	15	xfarahmand913	0.418707	0.376243	0.296463	0.49331	0.48739	0.613333	0.874723	15	0
50-50	en	farahmand	word2vec.avg	skipgram	500	surface	1	0.275837	0.253743	0.199777	0.41702	0.35254	0.413333	0.81158	0	33.3333	xfarahmand913	0.334103	0.307183	0.24117	0.456117	0.43717	0.506667	0.857747	0	0
50-50	en	farahmand	word2vec.avg	skipgram	500	surface	4	0.279587	0.25207	0.197857	0.414083	0.353077	0.416667	0.82044	0	33.3333	xfarahmand913	0.342447	0.3103	0.243017	0.454323	0.427043	0.513333	0.852117	0	0
50-50	en	farahmand	word2vec.avg	skipgram	500	surface	8	0.272663	0.243813	0.19149	0.416267	0.35104	0.4	0.818197	0	33.3333	xfarahmand913	0.334833	0.303393	0.23782	0.45561	0.4187	0.466667	0.846637	0	0
50-50	en	farahmand	word2vec.avg	skipgram	500	surface@stoppy	1	0.286703	0.260483	0.20501	0.42777	0.37603	0.456667	0.818143	0	20	xfarahmand913	0.34305	0.31863	0.250057	0.46924	0.449787	0.546667	0.86465	0	0
50-50	en	farahmand	word2vec.avg	skipgram	500	surface@stoppy	4	0.294837	0.26215	0.20621	0.43539	0.380617	0.446667	0.830207	0	20	xfarahmand913	0.35765	0.324007	0.254237	0.480517	0.456617	0.543333	0.865863	0	0
50-50	en	farahmand	word2vec.avg	skipgram	500	surface@stoppy	8	0.29734	0.263257	0.206617	0.43176	0.383223	0.463333	0.83536	0	20	xfarahmand913	0.358977	0.32316	0.253063	0.47405	0.452217	0.55	0.863827	0	0
50-50	en	farahmand	word2vec.run1	cbow	250	lemma	1	0.34472	0.3127	0.2462	0.46296	0.39463	0.46	0.81812	0	20	xfarahmand913	0.41457	0.37571	0.29493	0.50262	0.4921	0.56	0.87445	0	0
50-50	en	farahmand	word2vec.run1	cbow	250	lemma	4	0.35034	0.30894	0.24282	0.46186	0.40421	0.47	0.84221	0	20	xfarahmand913	0.41892	0.37314	0.29234	0.50467	0.48141	0.57	0.87225	0	0
50-50	en	farahmand	word2vec.run1	cbow	250	lemma	8	0.35062	0.31332	0.24669	0.46067	0.39953	0.46	0.83905	0	20	xfarahmand913	0.41995	0.37658	0.29537	0.50107	0.47504	0.52	0.86913	0	0
50-50	en	farahmand	word2vec.run1	cbow	250	lemmapos	1	0.32866	0.29394	0.23251	0.44974	0.37376	0.47	0.80322	5	15	xfarahmand913	0.41077	0.36477	0.28752	0.49615	0.48398	0.58	0.87424	15	0
50-50	en	farahmand	word2vec.run1	cbow	250	lemmapos	4	0.34826	0.31529	0.24926	0.45184	0.3776	0.47	0.80749	5	15	xfarahmand913	0.43213	0.38786	0.30563	0.4952	0.47886	0.61	0.86717	15	0
50-50	en	farahmand	word2vec.run1	cbow	250	lemmapos	8	0.3517	0.31595	0.24945	0.45455	0.38624	0.48	0.81164	5	15	xfarahmand913	0.43448	0.38834	0.30584	0.5011	0.48538	0.62	0.87186	15	0
50-50	en	farahmand	word2vec.run1	cbow	250	surface	1	0.29558	0.27082	0.21385	0.42485	0.35624	0.44	0.81512	0	20	xfarahmand913	0.36101	0.32694	0.2575	0.46429	0.44466	0.54	0.85855	0	0
50-50	en	farahmand	word2vec.run1	cbow	250	surface	4	0.30487	0.27618	0.21687	0.41633	0.36494	0.43	0.82694	0	20	xfarahmand913	0.36975	0.33456	0.26218	0.45176	0.43952	0.52	0.85812	0	0
50-50	en	farahmand	word2vec.run1	cbow	250	surface	8	0.30654	0.27359	0.21541	0.42903	0.37103	0.42	0.83099	0	20	xfarahmand913	0.37025	0.33387	0.26231	0.46995	0.43728	0.5	0.85708	0	0
50-50	en	farahmand	word2vec.run1	cbow	250	surface@stoppy	1	0.29688	0.26871	0.21173	0.42636	0.36961	0.47	0.80777	0	20	xfarahmand913	0.3587	0.32697	0.25684	0.46389	0.44733	0.53	0.86257	0	0
50-50	en	farahmand	word2vec.run1	cbow	250	surface@stoppy	4	0.31648	0.27521	0.21688	0.44571	0.38392	0.44	0.83395	0	20	xfarahmand913	0.38163	0.33758	0.26523	0.49024	0.45607	0.54	0.86471	0	0
50-50	en	farahmand	word2vec.run1	cbow	250	surface@stoppy	8	0.31628	0.27693	0.2177	0.4386	0.3909	0.47	0.83915	0	20	xfarahmand913	0.38053	0.3382	0.26534	0.48363	0.4624	0.55	0.86837	0	0
50-50	en	farahmand	word2vec.run1	cbow	750	lemma	1	0.34505	0.31696	0.24985	0.47134	0.42598	0.49	0.85058	0	20	xfarahmand913	0.40224	0.37497	0.29496	0.50952	0.50932	0.61	0.88461	0	0
50-50	en	farahmand	word2vec.run1	cbow	750	lemma	4	0.33868	0.29841	0.23451	0.46022	0.41515	0.5	0.84973	0	20	xfarahmand913	0.40129	0.3612	0.28342	0.50249	0.48975	0.58	0.87586	0	0
50-50	en	farahmand	word2vec.run1	cbow	750	lemma	8	0.33462	0.29997	0.23573	0.46186	0.39948	0.45	0.82579	0	20	xfarahmand913	0.3985	0.36314	0.28477	0.50831	0.47961	0.57	0.87271	0	0
50-50	en	farahmand	word2vec.run1	cbow	750	lemmapos	1	0.32784	0.29791	0.23506	0.44556	0.38745	0.48	0.81244	5	15	xfarahmand913	0.39417	0.36184	0.2849	0.48496	0.48639	0.62	0.87424	15	0
50-50	en	farahmand	word2vec.run1	cbow	750	lemmapos	4	0.32119	0.2895	0.22896	0.44498	0.37248	0.47	0.80757	5	15	xfarahmand913	0.39718	0.35923	0.2833	0.48352	0.47661	0.61	0.86844	15	0
50-50	en	farahmand	word2vec.run1	cbow	750	lemmapos	8	0.32114	0.28774	0.22729	0.4408	0.37313	0.46	0.79981	5	15	xfarahmand913	0.39846	0.35924	0.28301	0.48861	0.48159	0.6	0.87405	15	0
50-50	en	farahmand	word2vec.run1	cbow	750	surface	1	0.28616	0.26321	0.20689	0.43433	0.37587	0.49	0.82925	0	20	xfarahmand913	0.33756	0.3148	0.24676	0.46899	0.45409	0.54	0.86331	0	0
50-50	en	farahmand	word2vec.run1	cbow	750	surface	4	0.27955	0.25335	0.19869	0.41498	0.36157	0.43	0.8247	0	20	xfarahmand913	0.3391	0.31017	0.24277	0.45676	0.43648	0.51	0.85627	0	0
50-50	en	farahmand	word2vec.run1	cbow	750	surface	8	0.26371	0.23749	0.1866	0.42743	0.35423	0.43	0.82047	0	20	xfarahmand913	0.32406	0.29552	0.23167	0.46763	0.428	0.49	0.85279	0	0
50-50	en	farahmand	word2vec.run1	cbow	750	surface@stoppy	1	0.27755	0.25617	0.20147	0.42339	0.38099	0.48	0.82034	0	20	xfarahmand913	0.33023	0.31164	0.24435	0.46154	0.45263	0.54	0.86626	0	0
50-50	en	farahmand	word2vec.run1	cbow	750	surface@stoppy	4	0.28075	0.24761	0.19379	0.43231	0.38484	0.46	0.83318	0	20	xfarahmand913	0.34121	0.30986	0.24223	0.48101	0.46101	0.55	0.86893	0	0
50-50	en	farahmand	word2vec.run1	cbow	750	surface@stoppy	8	0.26917	0.24106	0.18864	0.41929	0.37163	0.45	0.83182	0	20	xfarahmand913	0.32806	0.29989	0.23417	0.46377	0.44069	0.52	0.86089	0	0
50-50	en	farahmand	word2vec.run1	cbow	500	lemma	1	0.32309	0.28892	0.22688	0.46667	0.39224	0.46	0.82943	0	41	xfarahmand913	0.38696	0.35188	0.27587	0.51185	0.48409	0.59	0.87254	0	0
50-50	en	farahmand	word2vec.run1	cbow	500	lemma	4	0.32506	0.28263	0.22182	0.45536	0.39587	0.46	0.841	0	41	xfarahmand913	0.39402	0.34992	0.27394	0.49888	0.47844	0.59	0.87164	0	0
50-50	en	farahmand	word2vec.run1	cbow	500	lemma	8	0.32026	0.28194	0.22149	0.45492	0.38272	0.44	0.83179	0	41	xfarahmand913	0.39033	0.34827	0.27299	0.49882	0.46679	0.54	0.8679	0	0
50-50	en	farahmand	word2vec.run1	cbow	500	lemmapos	1	0.32429	0.2933	0.23122	0.44444	0.38263	0.51	0.81111	5	15	xfarahmand913	0.39715	0.36024	0.28351	0.48718	0.48516	0.61	0.87264	15	0
50-50	en	farahmand	word2vec.run1	cbow	500	lemmapos	4	0.33265	0.29675	0.23483	0.44444	0.37115	0.48	0.7979	5	15	xfarahmand913	0.41524	0.36841	0.29055	0.49219	0.48472	0.64	0.87007	15	0
50-50	en	farahmand	word2vec.run1	cbow	500	lemmapos	8	0.32991	0.29418	0.23268	0.44444	0.37228	0.43	0.80391	5	15	xfarahmand913	0.41085	0.36667	0.28916	0.4898	0.47898	0.6	0.872	15	0
50-50	en	farahmand	word2vec.run1	cbow	500	surface	1	0.27772	0.25489	0.20069	0.4186	0.35607	0.41	0.81829	0	60	xfarahmand913	0.33581	0.30903	0.24283	0.45755	0.44103	0.52	0.85855	0	0
50-50	en	farahmand	word2vec.run1	cbow	500	surface	4	0.2762	0.25013	0.19655	0.41402	0.34483	0.4	0.8143	0	60	xfarahmand913	0.34039	0.30888	0.24202	0.4486	0.42153	0.5	0.84799	0	0
50-50	en	farahmand	word2vec.run1	cbow	500	surface	8	0.27111	0.24203	0.19033	0.42338	0.35097	0.42	0.81865	0	60	xfarahmand913	0.33385	0.30232	0.23725	0.46429	0.42005	0.48	0.84785	0	0
50-50	en	farahmand	word2vec.run1	cbow	500	surface@stoppy	1	0.28296	0.25922	0.20379	0.42458	0.36906	0.48	0.80769	0	20	xfarahmand913	0.33922	0.31672	0.24834	0.46224	0.44422	0.53	0.86118	0	0
50-50	en	farahmand	word2vec.run1	cbow	500	surface@stoppy	4	0.28631	0.25217	0.19812	0.43197	0.37443	0.41	0.82912	0	20	xfarahmand913	0.34882	0.31458	0.24662	0.47761	0.44965	0.54	0.86414	0	0
50-50	en	farahmand	word2vec.run1	cbow	500	surface@stoppy	8	0.28732	0.25326	0.19836	0.43021	0.3716	0.46	0.82487	0	20	xfarahmand913	0.35006	0.31467	0.24598	0.47396	0.44882	0.53	0.86338	0	0
50-50	en	farahmand	word2vec.run1	skipgram	250	lemma	1	0.32077	0.29113	0.22888	0.46058	0.37313	0.45	0.80648	0	20	xfarahmand913	0.3913	0.35447	0.27784	0.49765	0.47159	0.55	0.86114	0	0
50-50	en	farahmand	word2vec.run1	skipgram	250	lemma	4	0.33758	0.29597	0.23247	0.45228	0.39394	0.46	0.8378	0	20	xfarahmand913	0.4071	0.35993	0.28185	0.49412	0.47326	0.58	0.86856	0	0
50-50	en	farahmand	word2vec.run1	skipgram	250	lemma	8	0.33649	0.3	0.23605	0.44978	0.3898	0.44	0.83534	0	20	xfarahmand913	0.40953	0.36726	0.288	0.49048	0.47083	0.54	0.86741	0	0
50-50	en	farahmand	word2vec.run1	skipgram	250	lemmapos	1	0.32795	0.29395	0.23237	0.4484	0.37377	0.47	0.80319	5	15	xfarahmand913	0.4094	0.36628	0.28862	0.49609	0.47979	0.59	0.87056	15	0
50-50	en	farahmand	word2vec.run1	skipgram	250	lemmapos	4	0.34634	0.3127	0.24708	0.45421	0.37335	0.46	0.801	5	15	xfarahmand913	0.43354	0.3869	0.3048	0.49798	0.48287	0.63	0.86959	15	0
50-50	en	farahmand	word2vec.run1	skipgram	250	lemmapos	8	0.34836	0.31474	0.24855	0.45522	0.38134	0.46	0.80968	5	15	xfarahmand913	0.43216	0.38792	0.3056	0.50108	0.48234	0.63	0.87131	15	0
50-50	en	farahmand	word2vec.run1	skipgram	250	surface	1	0.29919	0.27322	0.21541	0.43411	0.35534	0.44	0.81643	0	20	xfarahmand913	0.36467	0.33047	0.25977	0.47516	0.44203	0.52	0.85989	0	0
50-50	en	farahmand	word2vec.run1	skipgram	250	surface	4	0.30982	0.27914	0.21947	0.42722	0.36914	0.43	0.82863	0	20	xfarahmand913	0.37582	0.3387	0.26555	0.46493	0.44635	0.5	0.86092	0	0
50-50	en	farahmand	word2vec.run1	skipgram	250	surface	8	0.30522	0.27254	0.21479	0.42581	0.37063	0.42	0.82829	0	20	xfarahmand913	0.36993	0.33319	0.26203	0.46461	0.44059	0.53	0.85599	0	0
50-50	en	farahmand	word2vec.run1	skipgram	250	surface@stoppy	1	0.30062	0.26857	0.21175	0.43595	0.37171	0.45	0.81146	0	20	xfarahmand913	0.36301	0.32809	0.25797	0.47414	0.45159	0.57	0.86389	0	0
50-50	en	farahmand	word2vec.run1	skipgram	250	surface@stoppy	4	0.31504	0.27542	0.21705	0.43265	0.38438	0.44	0.83139	0	20	xfarahmand913	0.37936	0.33778	0.26576	0.47664	0.45569	0.54	0.86476	0	0
50-50	en	farahmand	word2vec.run1	skipgram	250	surface@stoppy	8	0.31484	0.274	0.21548	0.43077	0.38796	0.46	0.83646	0	20	xfarahmand913	0.3794	0.33423	0.26218	0.47407	0.46109	0.54	0.86794	0	0
50-50	en	farahmand	word2vec.run1	skipgram	750	lemma	1	0.32537	0.29521	0.23215	0.45188	0.40154	0.49	0.82604	0	41	xfarahmand913	0.38485	0.356	0.27941	0.48941	0.49393	0.62	0.87885	0	0
50-50	en	farahmand	word2vec.run1	skipgram	750	lemma	4	0.3241	0.28249	0.22169	0.46522	0.4039	0.52	0.84456	0	41	xfarahmand913	0.38798	0.34591	0.2708	0.50739	0.4862	0.56	0.87505	0	0
50-50	en	farahmand	word2vec.run1	skipgram	750	lemma	8	0.31377	0.27676	0.21713	0.45852	0.38707	0.45	0.83542	0	20	xfarahmand913	0.38123	0.34303	0.26846	0.50125	0.46936	0.53	0.86783	0	0
50-50	en	farahmand	word2vec.run1	skipgram	750	lemmapos	1	0.3291	0.30163	0.23826	0.4408	0.38947	0.51	0.81271	5	15	xfarahmand913	0.39649	0.36513	0.28775	0.48219	0.49325	0.6	0.87865	15	0
50-50	en	farahmand	word2vec.run1	skipgram	750	lemmapos	4	0.32135	0.28996	0.22932	0.44635	0.36799	0.49	0.80138	5	15	xfarahmand913	0.39851	0.35989	0.28384	0.48515	0.4739	0.59	0.86577	15	0
50-50	en	farahmand	word2vec.run1	skipgram	750	lemmapos	8	0.32147	0.28547	0.22542	0.4356	0.37259	0.47	0.80445	5	15	xfarahmand913	0.39914	0.35715	0.2814	0.484	0.48164	0.62	0.87331	15	0
50-50	en	farahmand	word2vec.run1	skipgram	750	surface	1	0.27588	0.25843	0.20373	0.42357	0.35789	0.42	0.81879	0	60	xfarahmand913	0.32954	0.30937	0.24311	0.45714	0.44047	0.54	0.8582	0	0
50-50	en	farahmand	word2vec.run1	skipgram	750	surface	4	0.26681	0.24407	0.19133	0.40976	0.35122	0.42	0.82049	0	60	xfarahmand913	0.32703	0.29981	0.23451	0.44526	0.42724	0.49	0.8539	0	0
50-50	en	farahmand	word2vec.run1	skipgram	750	surface	8	0.27017	0.24271	0.19084	0.41955	0.36098	0.4	0.82638	0	20	xfarahmand913	0.3304	0.30212	0.23697	0.46262	0.42765	0.45	0.85372	0	0
50-50	en	farahmand	word2vec.run1	skipgram	750	surface@stoppy	1	0.27806	0.25692	0.20236	0.42656	0.37671	0.46	0.8165	0	20	xfarahmand913	0.33078	0.314	0.24661	0.46712	0.45109	0.55	0.86453	0	0
50-50	en	farahmand	word2vec.run1	skipgram	750	surface@stoppy	4	0.28077	0.24942	0.19548	0.43312	0.3864	0.47	0.83287	0	20	xfarahmand913	0.34053	0.30923	0.24205	0.47922	0.46245	0.58	0.86942	0	0
50-50	en	farahmand	word2vec.run1	skipgram	750	surface@stoppy	8	0.27094	0.24128	0.18889	0.42013	0.36885	0.45	0.82958	0	20	xfarahmand913	0.33007	0.29875	0.23327	0.46348	0.44137	0.51	0.86068	0	0
50-50	en	farahmand	word2vec.run1	skipgram	500	lemma	1	0.33361	0.29756	0.23382	0.46544	0.4043	0.51	0.82697	0	41	xfarahmand913	0.39828	0.36063	0.28277	0.50521	0.50231	0.59	0.88133	0	0
50-50	en	farahmand	word2vec.run1	skipgram	500	lemma	4	0.32385	0.28284	0.22178	0.46781	0.39151	0.44	0.83856	0	41	xfarahmand913	0.39263	0.34893	0.27292	0.50732	0.47406	0.58	0.87028	0	0
50-50	en	farahmand	word2vec.run1	skipgram	500	lemma	8	0.31829	0.28014	0.22034	0.46407	0.38208	0.44	0.83284	0	41	xfarahmand913	0.38844	0.34718	0.27233	0.50597	0.46511	0.53	0.86625	0	0
50-50	en	farahmand	word2vec.run1	skipgram	500	lemmapos	1	0.32422	0.29063	0.22927	0.44483	0.38559	0.5	0.81361	5	15	xfarahmand913	0.39727	0.3585	0.28231	0.48828	0.49585	0.6	0.87857	15	0
50-50	en	farahmand	word2vec.run1	skipgram	500	lemmapos	4	0.3338	0.29886	0.23632	0.44395	0.37264	0.49	0.80674	5	15	xfarahmand913	0.41455	0.3707	0.29236	0.49027	0.47842	0.59	0.8695	15	0
50-50	en	farahmand	word2vec.run1	skipgram	500	lemmapos	8	0.33138	0.29466	0.23263	0.44128	0.37862	0.48	0.8098	5	15	xfarahmand913	0.41047	0.36712	0.28909	0.48971	0.48216	0.6	0.87392	15	0
50-50	en	farahmand	word2vec.run1	skipgram	500	surface	1	0.27714	0.25595	0.20144	0.41542	0.35185	0.41	0.81433	0	60	xfarahmand913	0.33463	0.30861	0.24219	0.45455	0.43627	0.51	0.85729	0	0
50-50	en	farahmand	word2vec.run1	skipgram	500	surface	4	0.27998	0.25223	0.19798	0.416	0.35374	0.42	0.82121	0	60	xfarahmand913	0.34244	0.31014	0.24292	0.45805	0.42666	0.5	0.85198	0	0
50-50	en	farahmand	word2vec.run1	skipgram	500	surface	8	0.27263	0.24542	0.19293	0.41694	0.3472	0.4	0.81495	0	60	xfarahmand913	0.33478	0.30441	0.2388	0.45683	0.4146	0.44	0.84362	0	0
50-50	en	farahmand	word2vec.run1	skipgram	500	surface@stoppy	1	0.28255	0.25659	0.20204	0.42777	0.36898	0.43	0.81492	0	20	xfarahmand913	0.33923	0.31621	0.24818	0.47034	0.4417	0.52	0.86157	0	0
50-50	en	farahmand	word2vec.run1	skipgram	500	surface@stoppy	4	0.28844	0.25458	0.20034	0.4292	0.37584	0.45	0.82829	0	20	xfarahmand913	0.35156	0.31739	0.24918	0.4745	0.45248	0.54	0.86446	0	0
50-50	en	farahmand	word2vec.run1	skipgram	500	surface@stoppy	8	0.28606	0.252	0.19775	0.41894	0.37243	0.45	0.82698	0	20	xfarahmand913	0.34882	0.31334	0.24527	0.45963	0.44638	0.53	0.86224	0	0
50-50	en	farahmand	word2vec.run2	cbow	250	lemma	1	0.31912	0.28786	0.2262	0.45622	0.37421	0.45	0.80661	0	20	xfarahmand913	0.38956	0.35093	0.27492	0.49479	0.4684	0.53	0.86157	0	0
50-50	en	farahmand	word2vec.run2	cbow	250	lemma	4	0.34005	0.30289	0.23804	0.47134	0.3932	0.43	0.83709	0	20	xfarahmand913	0.41381	0.36862	0.28877	0.51332	0.47881	0.58	0.87119	0	0
50-50	en	farahmand	word2vec.run2	cbow	250	lemma	8	0.33452	0.29888	0.23523	0.45138	0.38457	0.44	0.83045	0	20	xfarahmand913	0.40827	0.36603	0.28706	0.4916	0.47136	0.53	0.86781	0	0
50-50	en	farahmand	word2vec.run2	cbow	250	lemmapos	1	0.33039	0.29834	0.23614	0.45	0.37102	0.48	0.79809	5	15	xfarahmand913	0.41278	0.37029	0.29229	0.49761	0.48709	0.56	0.87555	15	0
50-50	en	farahmand	word2vec.run2	cbow	250	lemmapos	4	0.34668	0.31113	0.24572	0.45385	0.37537	0.47	0.80223	5	15	xfarahmand913	0.43136	0.38412	0.30254	0.49778	0.48016	0.63	0.86745	15	0
50-50	en	farahmand	word2vec.run2	cbow	250	lemmapos	8	0.34818	0.31348	0.24762	0.45322	0.3808	0.46	0.80522	5	15	xfarahmand913	0.43188	0.38667	0.30467	0.5012	0.48171	0.6	0.87046	15	0
50-50	en	farahmand	word2vec.run2	cbow	250	surface	1	0.29678	0.26806	0.21136	0.4316	0.35838	0.4	0.81945	0	20	xfarahmand913	0.36004	0.32248	0.25364	0.46781	0.44498	0.52	0.86152	0	0
50-50	en	farahmand	word2vec.run2	cbow	250	surface	4	0.30085	0.27188	0.21364	0.4204	0.3606	0.42	0.82416	0	20	xfarahmand913	0.36584	0.32972	0.25852	0.45754	0.43574	0.48	0.85669	0	0
50-50	en	farahmand	word2vec.run2	cbow	250	surface	8	0.30091	0.27	0.21254	0.42157	0.36443	0.45	0.82476	0	20	xfarahmand913	0.36629	0.33129	0.26025	0.46211	0.43667	0.48	0.85496	0	0
50-50	en	farahmand	word2vec.run2	cbow	250	surface@stoppy	1	0.30166	0.2702	0.21293	0.43529	0.37632	0.45	0.81419	0	20	xfarahmand913	0.363	0.32908	0.25863	0.47345	0.45512	0.58	0.86603	0	0
50-50	en	farahmand	word2vec.run2	cbow	250	surface@stoppy	4	0.31239	0.27349	0.2152	0.43762	0.38452	0.46	0.83169	0	20	xfarahmand913	0.37751	0.33592	0.26391	0.48246	0.45756	0.53	0.86559	0	0
50-50	en	farahmand	word2vec.run2	cbow	250	surface@stoppy	8	0.31584	0.27449	0.21585	0.43352	0.38612	0.48	0.83487	0	20	xfarahmand913	0.38217	0.336	0.26365	0.47465	0.46337	0.57	0.8684	0	0
50-50	en	farahmand	word2vec.run2	cbow	750	lemma	1	0.32032	0.29128	0.22934	0.45676	0.39909	0.48	0.83423	0	20	xfarahmand913	0.3807	0.3518	0.27627	0.49624	0.49437	0.6	0.87807	0	0
50-50	en	farahmand	word2vec.run2	cbow	750	lemma	4	0.31626	0.27563	0.21628	0.46681	0.39041	0.46	0.83658	0	20	xfarahmand913	0.38111	0.34049	0.26658	0.50739	0.47196	0.59	0.86775	0	0
50-50	en	farahmand	word2vec.run2	cbow	750	lemma	8	0.31164	0.27757	0.21794	0.45666	0.37994	0.45	0.82766	0	20	xfarahmand913	0.37995	0.34328	0.26891	0.5	0.46746	0.56	0.86665	0	0
50-50	en	farahmand	word2vec.run2	cbow	750	lemmapos	1	0.32282	0.29574	0.23359	0.44604	0.3769	0.49	0.80523	5	15	xfarahmand913	0.39114	0.36029	0.28398	0.48682	0.48189	0.6	0.87036	15	0
50-50	en	farahmand	word2vec.run2	cbow	750	lemmapos	4	0.32085	0.28857	0.22812	0.44091	0.36899	0.5	0.80399	5	15	xfarahmand913	0.39849	0.35906	0.28302	0.48571	0.47557	0.6	0.86706	15	0
50-50	en	farahmand	word2vec.run2	cbow	750	lemmapos	8	0.3149	0.28402	0.22413	0.43604	0.36748	0.46	0.79934	5	15	xfarahmand913	0.39242	0.35599	0.28016	0.48319	0.47111	0.64	0.86704	15	0
50-50	en	farahmand	word2vec.run2	cbow	750	surface	1	0.2738	0.25659	0.20196	0.41912	0.35948	0.42	0.8207	0	60	xfarahmand913	0.32858	0.30709	0.24104	0.45503	0.44458	0.54	0.8615	0	0
50-50	en	farahmand	word2vec.run2	cbow	750	surface	4	0.27086	0.24762	0.19402	0.41401	0.35279	0.41	0.82081	0	20	xfarahmand913	0.3309	0.30323	0.23705	0.45009	0.42587	0.52	0.8521	0	0
50-50	en	farahmand	word2vec.run2	cbow	750	surface	8	0.26308	0.23503	0.18448	0.41521	0.3571	0.44	0.82397	0	20	xfarahmand913	0.32362	0.29339	0.22989	0.45438	0.42614	0.48	0.85342	0	0
50-50	en	farahmand	word2vec.run2	cbow	750	surface@stoppy	1	0.27944	0.25838	0.20324	0.42238	0.37789	0.45	0.81757	0	20	xfarahmand913	0.33344	0.31519	0.2473	0.4625	0.45588	0.54	0.86781	0	0
50-50	en	farahmand	word2vec.run2	cbow	750	surface@stoppy	4	0.28133	0.25011	0.19622	0.42581	0.38184	0.46	0.8363	0	20	xfarahmand913	0.34117	0.31096	0.24357	0.46914	0.45508	0.56	0.86587	0	0
50-50	en	farahmand	word2vec.run2	cbow	750	surface@stoppy	8	0.27469	0.24327	0.19085	0.4159	0.37475	0.47	0.83268	0	20	xfarahmand913	0.33297	0.30128	0.23583	0.45662	0.44401	0.51	0.86209	0	0
50-50	en	farahmand	word2vec.run2	cbow	500	lemma	1	0.32018	0.28924	0.2274	0.46531	0.38646	0.47	0.81532	0	20	xfarahmand913	0.38583	0.35275	0.27685	0.50926	0.48563	0.59	0.87523	0	0
50-50	en	farahmand	word2vec.run2	cbow	500	lemma	4	0.32751	0.28693	0.22539	0.47059	0.38814	0.46	0.83184	0	20	xfarahmand913	0.39699	0.35369	0.27698	0.51044	0.47617	0.59	0.87077	0	0
50-50	en	farahmand	word2vec.run2	cbow	500	lemma	8	0.31973	0.27809	0.21852	0.45059	0.3853	0.46	0.83527	0	20	xfarahmand913	0.38943	0.34425	0.26981	0.49203	0.46721	0.55	0.8679	0	0
50-50	en	farahmand	word2vec.run2	cbow	500	lemmapos	1	0.32639	0.29149	0.23015	0.44182	0.38567	0.5	0.8142	5	15	xfarahmand913	0.39896	0.3596	0.28325	0.48381	0.49382	0.61	0.87836	15	0
50-50	en	farahmand	word2vec.run2	cbow	500	lemmapos	4	0.33098	0.29499	0.23334	0.44765	0.37158	0.48	0.80588	5	15	xfarahmand913	0.41256	0.36749	0.28984	0.49372	0.4798	0.6	0.86979	15	0
50-50	en	farahmand	word2vec.run2	cbow	500	lemmapos	8	0.32995	0.29304	0.23146	0.44664	0.37722	0.46	0.80822	5	15	xfarahmand913	0.41018	0.36575	0.28799	0.49423	0.48351	0.63	0.87371	15	0
50-50	en	farahmand	word2vec.run2	cbow	500	surface	1	0.27792	0.25519	0.20104	0.42353	0.35079	0.39	0.80111	0	20	xfarahmand913	0.33631	0.30928	0.24294	0.45952	0.44206	0.53	0.85744	0	0
50-50	en	farahmand	word2vec.run2	cbow	500	surface	4	0.27861	0.25158	0.19751	0.4126	0.3542	0.39	0.82182	0	20	xfarahmand913	0.34061	0.30851	0.24177	0.45	0.4268	0.51	0.85286	0	0
50-50	en	farahmand	word2vec.run2	cbow	500	surface	8	0.27296	0.2451	0.19247	0.41475	0.35027	0.39	0.81459	0	20	xfarahmand913	0.33512	0.30479	0.23881	0.45407	0.42028	0.5	0.84354	0	0
50-50	en	farahmand	word2vec.run2	cbow	500	surface@stoppy	1	0.28546	0.26002	0.20438	0.4237	0.37494	0.47	0.81161	0	20	xfarahmand913	0.34211	0.31799	0.24921	0.46278	0.45095	0.53	0.86567	0	0
50-50	en	farahmand	word2vec.run2	cbow	500	surface@stoppy	4	0.28778	0.25318	0.19876	0.43299	0.3748	0.44	0.82831	0	20	xfarahmand913	0.35021	0.31436	0.2463	0.47867	0.44979	0.57	0.86306	0	0
50-50	en	farahmand	word2vec.run2	cbow	500	surface@stoppy	8	0.2829	0.25061	0.19651	0.42017	0.37364	0.45	0.82779	0	20	xfarahmand913	0.34593	0.31124	0.24341	0.46602	0.4496	0.53	0.86472	0	0
50-50	en	farahmand	word2vec.run2	skipgram	250	lemma	1	0.32109	0.28722	0.22578	0.45	0.37377	0.44	0.80834	0	20	xfarahmand913	0.39237	0.35213	0.27606	0.4902	0.47085	0.56	0.86669	0	0
50-50	en	farahmand	word2vec.run2	skipgram	250	lemma	4	0.34139	0.30171	0.23703	0.46681	0.39565	0.45	0.8374	0	20	xfarahmand913	0.41395	0.36791	0.28815	0.50608	0.48099	0.57	0.87224	0	0
50-50	en	farahmand	word2vec.run2	skipgram	250	lemma	8	0.33522	0.29899	0.23494	0.44737	0.38564	0.42	0.83311	0	20	xfarahmand913	0.40924	0.36664	0.28726	0.4913	0.46846	0.52	0.86686	0	0
50-50	en	farahmand	word2vec.run2	skipgram	250	lemmapos	1	0.32856	0.29092	0.22991	0.44218	0.37362	0.48	0.80172	5	15	xfarahmand913	0.41048	0.36321	0.28614	0.48837	0.48455	0.6	0.87395	15	0
50-50	en	farahmand	word2vec.run2	skipgram	250	lemmapos	4	0.34772	0.31478	0.24875	0.45347	0.37449	0.46	0.80103	5	15	xfarahmand913	0.43349	0.38811	0.30572	0.5	0.48124	0.64	0.86707	15	0
50-50	en	farahmand	word2vec.run2	skipgram	250	lemmapos	8	0.349	0.31187	0.24632	0.45261	0.38564	0.46	0.81392	5	15	xfarahmand913	0.43388	0.38536	0.30353	0.49776	0.4879	0.64	0.87375	15	0
50-50	en	farahmand	word2vec.run2	skipgram	250	surface	1	0.29894	0.26825	0.21161	0.43636	0.36071	0.43	0.82117	0	20	xfarahmand913	0.36204	0.3248	0.25565	0.47748	0.44658	0.53	0.86268	0	0
50-50	en	farahmand	word2vec.run2	skipgram	250	surface	4	0.30067	0.27076	0.21265	0.41948	0.36215	0.41	0.82546	0	20	xfarahmand913	0.36639	0.32896	0.25783	0.45474	0.43871	0.5	0.85776	0	0
50-50	en	farahmand	word2vec.run2	skipgram	250	surface	8	0.30312	0.2705	0.213	0.42454	0.36604	0.41	0.82772	0	20	xfarahmand913	0.36752	0.33157	0.26037	0.46529	0.43509	0.5	0.85548	0	0
50-50	en	farahmand	word2vec.run2	skipgram	250	surface@stoppy	1	0.30004	0.26916	0.21208	0.43364	0.37183	0.45	0.8086	0	20	xfarahmand913	0.36125	0.32796	0.25772	0.47158	0.44913	0.54	0.86309	0	0
50-50	en	farahmand	word2vec.run2	skipgram	250	surface@stoppy	4	0.31127	0.27249	0.21466	0.44186	0.38012	0.43	0.82918	0	20	xfarahmand913	0.37734	0.33541	0.26364	0.48673	0.45549	0.55	0.86449	0	0
50-50	en	farahmand	word2vec.run2	skipgram	250	surface@stoppy	8	0.32816	0.28793	0.22641	0.44156	0.39922	0.5	0.84313	0	20	xfarahmand913	0.39313	0.34976	0.27428	0.48523	0.47325	0.58	0.87115	0	0
50-50	en	farahmand	word2vec.run2	skipgram	750	lemma	1	0.31796	0.28947	0.22784	0.44907	0.39847	0.51	0.82505	0	20	xfarahmand913	0.37822	0.35082	0.27559	0.48636	0.4945	0.62	0.87825	0	0
50-50	en	farahmand	word2vec.run2	skipgram	750	lemma	4	0.31713	0.27847	0.21833	0.46606	0.39132	0.47	0.83686	0	20	xfarahmand913	0.38211	0.34324	0.26857	0.51163	0.47282	0.58	0.86818	0	0
50-50	en	farahmand	word2vec.run2	skipgram	750	lemma	8	0.31012	0.27422	0.21528	0.45041	0.37603	0.47	0.81557	0	20	xfarahmand913	0.37786	0.34023	0.26644	0.49282	0.4639	0.52	0.86671	0	0
50-50	en	farahmand	word2vec.run2	skipgram	750	lemmapos	1	0.32679	0.29619	0.23372	0.44147	0.39084	0.54	0.812	5	15	xfarahmand913	0.39297	0.35981	0.28326	0.48302	0.48805	0.6	0.86894	15	0
50-50	en	farahmand	word2vec.run2	skipgram	750	lemmapos	4	0.32548	0.28959	0.22892	0.44717	0.37714	0.5	0.80924	5	15	xfarahmand913	0.40208	0.35973	0.28359	0.4878	0.48441	0.62	0.87033	15	0
50-50	en	farahmand	word2vec.run2	skipgram	750	lemmapos	8	0.32063	0.28777	0.22748	0.43678	0.37538	0.49	0.80562	5	15	xfarahmand913	0.39782	0.35854	0.2826	0.48438	0.48449	0.62	0.87439	15	0
50-50	en	farahmand	word2vec.run2	skipgram	750	surface	1	0.30491	0.2868	0.22651	0.45304	0.38791	0.49	0.83012	0	20	xfarahmand913	0.35918	0.33922	0.26721	0.4888	0.47874	0.56	0.87203	0	0
50-50	en	farahmand	word2vec.run2	skipgram	750	surface	4	0.27219	0.24552	0.19233	0.41639	0.35527	0.41	0.82121	0	20	xfarahmand913	0.33219	0.30213	0.23623	0.45304	0.43191	0.52	0.85553	0	0
50-50	en	farahmand	word2vec.run2	skipgram	750	surface	8	0.26203	0.23575	0.18498	0.41083	0.35105	0.41	0.81826	0	20	xfarahmand913	0.32169	0.29374	0.22994	0.44883	0.41842	0.51	0.84636	0	0
50-50	en	farahmand	word2vec.run2	skipgram	750	surface@stoppy	1	0.28033	0.26343	0.20766	0.44008	0.37671	0.46	0.8149	0	20	xfarahmand913	0.33337	0.31949	0.25128	0.48444	0.45134	0.54	0.86547	0	0
50-50	en	farahmand	word2vec.run2	skipgram	750	surface@stoppy	4	0.28018	0.25161	0.19754	0.4346	0.38102	0.44	0.83274	0	20	xfarahmand913	0.33988	0.31135	0.24384	0.48058	0.4589	0.56	0.86759	0	0
50-50	en	farahmand	word2vec.run2	skipgram	750	surface@stoppy	8	0.28322	0.2555	0.20036	0.42484	0.3818	0.46	0.83664	0	20	xfarahmand913	0.34129	0.31367	0.24565	0.4686	0.44906	0.52	0.86343	0	0
50-50	en	farahmand	word2vec.run2	skipgram	500	lemma	1	0.32891	0.29433	0.23142	0.47702	0.40089	0.5	0.83066	0	20	xfarahmand913	0.393	0.35589	0.27933	0.51852	0.50204	0.61	0.88124	0	0
50-50	en	farahmand	word2vec.run2	skipgram	500	lemma	4	0.32635	0.28226	0.22173	0.46835	0.39327	0.45	0.83899	0	20	xfarahmand913	0.39672	0.34978	0.27407	0.50962	0.48035	0.58	0.87225	0	0
50-50	en	farahmand	word2vec.run2	skipgram	500	lemma	8	0.32375	0.28836	0.22671	0.46091	0.38124	0.44	0.83055	0	20	xfarahmand913	0.39585	0.35688	0.27984	0.50472	0.4674	0.55	0.86592	0	0
50-50	en	farahmand	word2vec.run2	skipgram	500	lemmapos	1	0.32297	0.2916	0.22993	0.43934	0.38341	0.5	0.81095	5	15	xfarahmand913	0.39618	0.35905	0.28252	0.48417	0.48971	0.62	0.87486	15	0
50-50	en	farahmand	word2vec.run2	skipgram	500	lemmapos	4	0.33465	0.29912	0.23654	0.44749	0.37325	0.49	0.80397	5	15	xfarahmand913	0.41751	0.37135	0.29276	0.49421	0.48502	0.62	0.87203	15	0
50-50	en	farahmand	word2vec.run2	skipgram	500	lemmapos	8	0.33042	0.29859	0.23603	0.44526	0.37197	0.47	0.80293	5	15	xfarahmand913	0.41261	0.37139	0.29266	0.49367	0.48273	0.61	0.87346	15	0
50-50	en	farahmand	word2vec.run2	skipgram	500	surface	1	0.2763	0.25539	0.20108	0.42185	0.35392	0.4	0.81656	0	20	xfarahmand913	0.3362	0.31096	0.24415	0.46154	0.43817	0.5	0.8574	0	0
50-50	en	farahmand	word2vec.run2	skipgram	500	surface	4	0.27674	0.25015	0.19629	0.41176	0.3501	0.42	0.81742	0	20	xfarahmand913	0.34021	0.3089	0.24174	0.44934	0.42704	0.53	0.85127	0	0
50-50	en	farahmand	word2vec.run2	skipgram	500	surface	8	0.27452	0.24516	0.19257	0.4139	0.35409	0.4	0.82133	0	20	xfarahmand913	0.33662	0.30484	0.23895	0.45276	0.42303	0.48	0.85056	0	0
50-50	en	farahmand	word2vec.run2	skipgram	500	surface@stoppy	1	0.28788	0.2622	0.20632	0.42471	0.38068	0.47	0.82012	0	20	xfarahmand913	0.34492	0.32103	0.25182	0.46522	0.4587	0.58	0.86823	0	0
50-50	en	farahmand	word2vec.run2	skipgram	500	surface@stoppy	4	0.29189	0.25811	0.20279	0.43478	0.37958	0.46	0.82997	0	20	xfarahmand913	0.35535	0.31975	0.25067	0.47981	0.45671	0.55	0.86646	0	0
50-50	en	farahmand	word2vec.run2	skipgram	500	surface@stoppy	8	0.3016	0.26841	0.21079	0.43977	0.38759	0.47	0.83919	0	20	xfarahmand913	0.36293	0.32781	0.25681	0.48472	0.4553	0.58	0.86482	0	0
50-50	en	farahmand	word2vec.run3	cbow	250	lemma	1	0.31997	0.28782	0.22616	0.4612	0.37492	0.45	0.80937	0	20	xfarahmand913	0.39236	0.35282	0.27652	0.50251	0.47336	0.55	0.8679	0	0
50-50	en	farahmand	word2vec.run3	cbow	250	lemma	4	0.35477	0.31313	0.24624	0.46154	0.40588	0.48	0.84388	0	20	xfarahmand913	0.42377	0.37688	0.29535	0.50485	0.48484	0.57	0.87334	0	0
50-50	en	farahmand	word2vec.run3	cbow	250	lemma	8	0.33469	0.29863	0.23472	0.44958	0.3862	0.42	0.83483	0	20	xfarahmand913	0.4082	0.36624	0.28693	0.49188	0.46641	0.52	0.86642	0	0
50-50	en	farahmand	word2vec.run3	cbow	250	lemmapos	1	0.3386	0.3032	0.23996	0.45485	0.37898	0.47	0.80521	5	15	xfarahmand913	0.42109	0.37634	0.29697	0.49905	0.49002	0.59	0.8748	15	0
50-50	en	farahmand	word2vec.run3	cbow	250	lemmapos	4	0.35917	0.32433	0.25635	0.46726	0.38601	0.48	0.80743	5	15	xfarahmand913	0.44433	0.39633	0.31239	0.51116	0.49538	0.63	0.87433	15	0
50-50	en	farahmand	word2vec.run3	cbow	250	lemmapos	8	0.35259	0.31568	0.24932	0.45291	0.3853	0.48	0.81337	5	15	xfarahmand913	0.43611	0.38798	0.30568	0.49351	0.48932	0.64	0.87443	15	0
50-50	en	farahmand	word2vec.run3	cbow	250	surface	1	0.30323	0.27574	0.2175	0.44758	0.36089	0.41	0.82114	0	20	xfarahmand913	0.36819	0.33308	0.26231	0.48879	0.44604	0.48	0.86086	0	0
50-50	en	farahmand	word2vec.run3	cbow	250	surface	4	0.31571	0.28619	0.22513	0.42617	0.37088	0.42	0.8281	0	20	xfarahmand913	0.38276	0.34458	0.27031	0.46347	0.4496	0.55	0.86162	0	0
50-50	en	farahmand	word2vec.run3	cbow	250	surface	8	0.31418	0.28259	0.22292	0.43568	0.37444	0.42	0.83208	0	20	xfarahmand913	0.38	0.34522	0.27153	0.47308	0.44369	0.5	0.85895	0	0
50-50	en	farahmand	word2vec.run3	cbow	250	surface@stoppy	1	0.31074	0.27852	0.21962	0.44055	0.37969	0.49	0.81489	0	20	xfarahmand913	0.37122	0.33748	0.26542	0.47702	0.45716	0.55	0.86594	0	0
50-50	en	farahmand	word2vec.run3	cbow	250	surface@stoppy	4	0.32044	0.28049	0.22095	0.44488	0.38816	0.47	0.83233	0	20	xfarahmand913	0.38593	0.34319	0.26991	0.48879	0.46436	0.56	0.86786	0	0
50-50	en	farahmand	word2vec.run3	cbow	250	surface@stoppy	8	0.32757	0.28895	0.22729	0.44318	0.39716	0.49	0.84156	0	20	xfarahmand913	0.38977	0.34782	0.27295	0.48707	0.46339	0.58	0.86683	0	0
50-50	en	farahmand	word2vec.run3	cbow	750	lemma	1	0.33336	0.29985	0.23605	0.47196	0.40674	0.52	0.82752	0	20	xfarahmand913	0.3935	0.36154	0.28404	0.50919	0.50105	0.59	0.88089	0	0
50-50	en	farahmand	word2vec.run3	cbow	750	lemma	4	0.31505	0.27505	0.21569	0.45749	0.39547	0.47	0.84174	0	20	xfarahmand913	0.38032	0.34004	0.26621	0.49749	0.47483	0.56	0.8714	0	0
50-50	en	farahmand	word2vec.run3	cbow	750	lemma	8	0.31051	0.27266	0.21392	0.45203	0.37866	0.46	0.82544	0	20	xfarahmand913	0.37907	0.33929	0.26558	0.49389	0.46616	0.57	0.86745	0	0
50-50	en	farahmand	word2vec.run3	cbow	750	lemmapos	1	0.33431	0.30633	0.24241	0.45059	0.38657	0.5	0.81185	5	15	xfarahmand913	0.40258	0.37263	0.2944	0.49327	0.48776	0.61	0.87252	15	0
50-50	en	farahmand	word2vec.run3	cbow	750	lemmapos	4	0.34619	0.3156	0.24958	0.46449	0.3874	0.5	0.80732	5	15	xfarahmand913	0.42195	0.38439	0.30317	0.50661	0.49925	0.63	0.87907	15	0
50-50	en	farahmand	word2vec.run3	cbow	750	lemmapos	8	0.32126	0.28621	0.22604	0.43902	0.37779	0.46	0.80989	5	15	xfarahmand913	0.3975	0.35734	0.28144	0.48842	0.48229	0.61	0.8741	15	0
50-50	en	farahmand	word2vec.run3	cbow	750	surface	1	0.29077	0.26947	0.21265	0.43083	0.3798	0.44	0.8307	0	20	xfarahmand913	0.34423	0.32207	0.25345	0.46827	0.4644	0.59	0.86872	0	0
50-50	en	farahmand	word2vec.run3	cbow	750	surface	4	0.29305	0.26675	0.20931	0.43292	0.37567	0.44	0.83053	0	20	xfarahmand913	0.35302	0.32205	0.25218	0.47177	0.45332	0.56	0.86319	0	0
50-50	en	farahmand	word2vec.run3	cbow	750	surface	8	0.26178	0.23586	0.18517	0.41653	0.35145	0.39	0.81847	0	20	xfarahmand913	0.32203	0.29348	0.23	0.45601	0.41985	0.46	0.84964	0	0
50-50	en	farahmand	word2vec.run3	cbow	750	surface@stoppy	1	0.29065	0.26922	0.21227	0.43058	0.38677	0.47	0.82168	0	20	xfarahmand913	0.34289	0.32434	0.255	0.46953	0.4568	0.57	0.86508	0	0
50-50	en	farahmand	word2vec.run3	cbow	750	surface@stoppy	4	0.29116	0.26237	0.20575	0.43532	0.38391	0.46	0.83138	0	20	xfarahmand913	0.34999	0.32032	0.25068	0.48	0.45549	0.56	0.86485	0	0
50-50	en	farahmand	word2vec.run3	cbow	750	surface@stoppy	8	0.27116	0.24289	0.19027	0.41288	0.37013	0.45	0.82927	0	20	xfarahmand913	0.33135	0.30195	0.23607	0.45259	0.4442	0.53	0.86237	0	0
50-50	en	farahmand	word2vec.run3	cbow	500	lemma	1	0.32574	0.29096	0.22886	0.46325	0.3909	0.47	0.81777	0	20	xfarahmand913	0.39112	0.3552	0.2788	0.50378	0.4935	0.57	0.87879	0	0
50-50	en	farahmand	word2vec.run3	cbow	500	lemma	4	0.3277	0.28579	0.22457	0.46667	0.3938	0.45	0.83794	0	20	xfarahmand913	0.39713	0.35314	0.27668	0.50718	0.47901	0.58	0.8708	0	0
50-50	en	farahmand	word2vec.run3	cbow	500	lemma	8	0.32015	0.28311	0.2224	0.45808	0.37884	0.43	0.82544	0	20	xfarahmand913	0.39001	0.35087	0.27489	0.49882	0.46608	0.54	0.86687	0	0
50-50	en	farahmand	word2vec.run3	cbow	500	lemmapos	1	0.33586	0.3007	0.23738	0.45247	0.39491	0.49	0.81841	5	15	xfarahmand913	0.40819	0.36872	0.29056	0.49462	0.49957	0.59	0.88105	15	0
50-50	en	farahmand	word2vec.run3	cbow	500	lemmapos	4	0.35256	0.31693	0.25058	0.46265	0.39154	0.5	0.80826	5	15	xfarahmand913	0.43295	0.38706	0.30524	0.50425	0.49936	0.61	0.8775	15	0
50-50	en	farahmand	word2vec.run3	cbow	500	lemmapos	8	0.32932	0.29563	0.23369	0.44402	0.37131	0.46	0.8062	5	15	xfarahmand913	0.41051	0.36867	0.29044	0.49099	0.48083	0.6	0.87151	15	0
50-50	en	farahmand	word2vec.run3	cbow	500	surface	1	0.29009	0.26773	0.21109	0.43253	0.36541	0.44	0.82286	0	20	xfarahmand913	0.3474	0.32198	0.25326	0.46939	0.4484	0.55	0.86167	0	0
50-50	en	farahmand	word2vec.run3	cbow	500	surface	4	0.30121	0.27214	0.21429	0.4408	0.36838	0.44	0.82578	0	20	xfarahmand913	0.36392	0.32963	0.25886	0.48049	0.44525	0.52	0.85803	0	0
50-50	en	farahmand	word2vec.run3	cbow	500	surface	8	0.26893	0.24056	0.18911	0.41357	0.34492	0.39	0.81155	0	20	xfarahmand913	0.33005	0.2994	0.2349	0.45372	0.41144	0.48	0.83936	0	0
50-50	en	farahmand	word2vec.run3	cbow	500	surface@stoppy	1	0.29605	0.27372	0.21569	0.43083	0.38112	0.48	0.81963	0	20	xfarahmand913	0.34965	0.32834	0.25812	0.46667	0.44877	0.55	0.86333	0	0
50-50	en	farahmand	word2vec.run3	cbow	500	surface@stoppy	4	0.29778	0.26298	0.20658	0.43701	0.38558	0.46	0.83788	0	20	xfarahmand913	0.35947	0.32466	0.2546	0.48526	0.45589	0.53	0.86554	0	0
50-50	en	farahmand	word2vec.run3	cbow	500	surface@stoppy	8	0.30877	0.27454	0.21562	0.44151	0.39297	0.48	0.84035	0	20	xfarahmand913	0.36937	0.33276	0.26077	0.48394	0.46219	0.58	0.86748	0	0
50-50	en	farahmand	word2vec.run3	skipgram	250	lemma	1	0.34535	0.31198	0.24549	0.45588	0.40074	0.49	0.82499	0	20	xfarahmand913	0.41348	0.37458	0.2938	0.4978	0.49121	0.58	0.87661	0	0
50-50	en	farahmand	word2vec.run3	skipgram	250	lemma	4	0.34645	0.30456	0.23949	0.45455	0.39513	0.46	0.83773	0	20	xfarahmand913	0.4169	0.37061	0.29036	0.49877	0.47707	0.57	0.86946	0	0
50-50	en	farahmand	word2vec.run3	skipgram	250	lemma	8	0.35133	0.3146	0.24762	0.46476	0.3969	0.45	0.8375	0	20	xfarahmand913	0.42116	0.37883	0.29703	0.50435	0.47562	0.54	0.86852	0	0
50-50	en	farahmand	word2vec.run3	skipgram	250	lemmapos	1	0.33968	0.30387	0.24059	0.4586	0.37906	0.45	0.8074	5	15	xfarahmand913	0.42119	0.37777	0.29824	0.50608	0.48695	0.6	0.87375	15	0
50-50	en	farahmand	word2vec.run3	skipgram	250	lemmapos	4	0.35576	0.32127	0.25419	0.46154	0.38591	0.47	0.80622	5	15	xfarahmand913	0.441	0.39327	0.31034	0.50597	0.49242	0.61	0.87396	15	0
50-50	en	farahmand	word2vec.run3	skipgram	250	lemmapos	8	0.36459	0.33155	0.26197	0.4685	0.39216	0.48	0.81404	5	15	xfarahmand913	0.44607	0.40203	0.31677	0.50901	0.49269	0.62	0.87412	15	0
50-50	en	farahmand	word2vec.run3	skipgram	250	surface	1	0.3146	0.28766	0.22698	0.43738	0.37248	0.46	0.82903	0	20	xfarahmand913	0.37725	0.34372	0.27061	0.4764	0.45469	0.51	0.8644	0	0
50-50	en	farahmand	word2vec.run3	skipgram	250	surface	4	0.30603	0.27369	0.21491	0.42415	0.36565	0.42	0.82714	0	20	xfarahmand913	0.37174	0.33236	0.26039	0.46032	0.44311	0.5	0.85916	0	0
50-50	en	farahmand	word2vec.run3	skipgram	250	surface	8	0.30131	0.27021	0.213	0.42202	0.36176	0.4	0.82349	0	20	xfarahmand913	0.36684	0.33247	0.26134	0.4625	0.43355	0.51	0.85329	0	0
50-50	en	farahmand	word2vec.run3	skipgram	250	surface@stoppy	1	0.3011	0.27017	0.21315	0.43444	0.37483	0.49	0.80952	0	20	xfarahmand913	0.36196	0.32846	0.25841	0.47241	0.45344	0.55	0.86386	0	0
50-50	en	farahmand	word2vec.run3	skipgram	250	surface@stoppy	4	0.32301	0.27993	0.22037	0.448	0.38892	0.44	0.83293	0	20	xfarahmand913	0.38653	0.34241	0.26906	0.48998	0.46104	0.53	0.86665	0	0
50-50	en	farahmand	word2vec.run3	skipgram	250	surface@stoppy	8	0.32984	0.2889	0.22713	0.44622	0.39723	0.47	0.84131	0	20	xfarahmand913	0.39277	0.34932	0.27406	0.48539	0.46822	0.59	0.86943	0	0
50-50	en	farahmand	word2vec.run3	skipgram	750	lemma	1	0.32826	0.30003	0.23607	0.46154	0.41136	0.51	0.82839	0	20	xfarahmand913	0.38555	0.35918	0.28212	0.49881	0.50221	0.62	0.88125	0	0
50-50	en	farahmand	word2vec.run3	skipgram	750	lemma	4	0.32952	0.29201	0.22933	0.46541	0.40381	0.49	0.84466	0	20	xfarahmand913	0.39439	0.3562	0.27907	0.50952	0.48376	0.56	0.87383	0	0
50-50	en	farahmand	word2vec.run3	skipgram	750	lemma	8	0.32855	0.29038	0.22776	0.45322	0.39186	0.45	0.83407	0	20	xfarahmand913	0.3927	0.35427	0.2773	0.49631	0.46964	0.54	0.86701	0	0
50-50	en	farahmand	word2vec.run3	skipgram	750	lemmapos	1	0.32937	0.29864	0.23676	0.44632	0.38896	0.48	0.81476	5	15	xfarahmand913	0.3992	0.3663	0.28968	0.48931	0.49579	0.6	0.88026	15	0
50-50	en	farahmand	word2vec.run3	skipgram	750	lemmapos	4	0.34656	0.31341	0.2476	0.46389	0.39469	0.56	0.80901	5	15	xfarahmand913	0.42058	0.38161	0.30087	0.50627	0.49557	0.63	0.87402	15	0
50-50	en	farahmand	word2vec.run3	skipgram	750	lemmapos	8	0.34388	0.31014	0.24512	0.45322	0.39134	0.48	0.81431	5	15	xfarahmand913	0.41891	0.37959	0.29913	0.49882	0.49143	0.63	0.875	15	0
50-50	en	farahmand	word2vec.run3	skipgram	750	surface	1	0.27569	0.26134	0.20593	0.42202	0.36043	0.43	0.82083	0	20	xfarahmand913	0.32893	0.31068	0.24413	0.45808	0.44011	0.52	0.85871	0	0
50-50	en	farahmand	word2vec.run3	skipgram	750	surface	4	0.2732	0.24898	0.19516	0.41885	0.35682	0.4	0.82421	0	20	xfarahmand913	0.33292	0.30602	0.23939	0.4549	0.42946	0.49	0.85463	0	0
50-50	en	farahmand	word2vec.run3	skipgram	750	surface	8	0.28608	0.25512	0.20107	0.42949	0.37486	0.43	0.83029	0	20	xfarahmand913	0.34577	0.3128	0.24586	0.47016	0.4428	0.52	0.85688	0	0
50-50	en	farahmand	word2vec.run3	skipgram	750	surface@stoppy	1	0.27806	0.25447	0.19994	0.42991	0.37341	0.45	0.81803	0	20	xfarahmand913	0.3304	0.31086	0.24361	0.46862	0.44616	0.53	0.86322	0	0
50-50	en	farahmand	word2vec.run3	skipgram	750	surface@stoppy	4	0.29089	0.26032	0.20434	0.43348	0.38792	0.44	0.83892	0	20	xfarahmand913	0.34828	0.31919	0.25015	0.47529	0.45572	0.55	0.86592	0	0
50-50	en	farahmand	word2vec.run3	skipgram	750	surface@stoppy	8	0.28978	0.26051	0.20437	0.42581	0.39109	0.48	0.8405	0	20	xfarahmand913	0.3481	0.3164	0.24762	0.46798	0.45847	0.57	0.86679	0	0
50-50	en	farahmand	word2vec.run3	skipgram	500	lemma	1	0.34658	0.31439	0.24751	0.47682	0.41465	0.51	0.82892	0	20	xfarahmand913	0.4096	0.37748	0.2965	0.51613	0.51267	0.61	0.88281	0	0
50-50	en	farahmand	word2vec.run3	skipgram	500	lemma	4	0.33164	0.2887	0.22666	0.47265	0.39783	0.44	0.83993	0	20	xfarahmand913	0.3985	0.35552	0.27846	0.51741	0.47638	0.57	0.86777	0	0
50-50	en	farahmand	word2vec.run3	skipgram	500	lemma	8	0.33414	0.2926	0.22963	0.46457	0.39758	0.48	0.83952	0	20	xfarahmand913	0.40098	0.35815	0.28046	0.50564	0.47669	0.56	0.87092	0	0
50-50	en	farahmand	word2vec.run3	skipgram	500	lemmapos	1	0.33602	0.30298	0.23986	0.45255	0.38683	0.47	0.8013	5	15	xfarahmand913	0.41084	0.37321	0.29482	0.49485	0.50038	0.61	0.88135	15	0
50-50	en	farahmand	word2vec.run3	skipgram	500	lemmapos	4	0.34755	0.31325	0.2478	0.46341	0.3808	0.46	0.8031	5	15	xfarahmand913	0.42718	0.38391	0.30295	0.50585	0.48694	0.63	0.87149	15	0
50-50	en	farahmand	word2vec.run3	skipgram	500	lemmapos	8	0.35539	0.32027	0.25313	0.45783	0.39626	0.49	0.81536	5	15	xfarahmand913	0.43304	0.39022	0.30764	0.49655	0.49728	0.63	0.87679	15	0
50-50	en	farahmand	word2vec.run3	skipgram	500	surface	1	0.27407	0.24989	0.19681	0.41379	0.35185	0.43	0.80385	0	20	xfarahmand913	0.33148	0.30198	0.23717	0.45226	0.43707	0.51	0.85855	0	0
50-50	en	farahmand	word2vec.run3	skipgram	500	surface	4	0.28204	0.25383	0.1993	0.41449	0.35539	0.41	0.82269	0	20	xfarahmand913	0.34469	0.31186	0.24439	0.45558	0.42743	0.51	0.8531	0	0
50-50	en	farahmand	word2vec.run3	skipgram	500	surface	8	0.27084	0.24086	0.18897	0.41796	0.35183	0.4	0.81831	0	20	xfarahmand913	0.3331	0.30093	0.23571	0.45724	0.41847	0.48	0.84573	0	0
50-50	en	farahmand	word2vec.run3	skipgram	500	surface@stoppy	1	0.28968	0.26266	0.20667	0.43083	0.37843	0.47	0.81939	0	20	xfarahmand913	0.345	0.31865	0.25017	0.47216	0.44896	0.54	0.86415	0	0
50-50	en	farahmand	word2vec.run3	skipgram	500	surface@stoppy	4	0.30418	0.27376	0.2155	0.44219	0.38643	0.43	0.83236	0	20	xfarahmand913	0.36604	0.33488	0.26286	0.48724	0.46066	0.54	0.86667	0	0
50-50	en	farahmand	word2vec.run3	skipgram	500	surface@stoppy	8	0.30436	0.26936	0.21131	0.43657	0.38965	0.47	0.83991	0	20	xfarahmand913	0.36518	0.32833	0.25711	0.4778	0.45497	0.54	0.86442	0	0
50-50	en	farahmand	minimantics	salehi	1000	lemma	1	0.12781	0.12513	0.0988	0.3541	0.22187	0.17	0.68323	0	20	xfarahmand913	0.2389	0.22221	0.17395	0.40226	0.32318	0.39	0.76247	0	0
50-50	en	farahmand	minimantics	salehi	1000	lemma	4	0.16156	0.16821	0.13279	0.37537	0.23947	0.19	0.69183	0	9	xfarahmand913	0.30383	0.28128	0.21991	0.43478	0.39104	0.47	0.81628	0	0
50-50	en	farahmand	minimantics	salehi	1000	lemma	8	0.1684	0.17326	0.13673	0.3759	0.24386	0.23	0.69567	0	7	xfarahmand913	0.31551	0.28689	0.22431	0.43082	0.40989	0.5	0.8437	0	0
50-50	en	farahmand	minimantics	salehi	1000	lemmapos	1	0.11515	0.1138	0.08972	0.35098	0.21564	0.18	0.67846	8	12	xfarahmand913	0.22264	0.20684	0.16163	0.39077	0.30139	0.37	0.74942	14	0
50-50	en	farahmand	minimantics	salehi	1000	lemmapos	4	0.15132	0.16176	0.12786	0.36822	0.23351	0.17	0.68701	10	8	xfarahmand913	0.29673	0.27708	0.2168	0.42263	0.36657	0.49	0.79062	9	0
50-50	en	farahmand	minimantics	salehi	1000	lemmapos	8	0.16372	0.1767	0.13925	0.37568	0.24039	0.19	0.69349	10	7	xfarahmand913	0.3174	0.29363	0.22931	0.4339	0.38795	0.52	0.81915	9	0
50-50	en	farahmand	minimantics	salehi	1000	surface	1	0.07393	0.05735	0.04543	0.33223	0.20599	0.16	0.6767	0	20	xfarahmand913	0.15397	0.13395	0.10454	0.37463	0.27964	0.3	0.75876	0	0
50-50	en	farahmand	minimantics	salehi	1000	surface	4	0.09282	0.08855	0.06975	0.34501	0.21121	0.16	0.67831	0	20	xfarahmand913	0.20632	0.1841	0.14326	0.39432	0.31199	0.37	0.77537	0	0
50-50	en	farahmand	minimantics	salehi	1000	surface	8	0.10346	0.10015	0.07903	0.34474	0.21629	0.19	0.68215	0	18	xfarahmand913	0.22106	0.19784	0.15414	0.39339	0.33475	0.35	0.81082	0	0
50-50	en	farahmand	minimantics	salehi	1000	surface@stoppy	1	0.073	0.06227	0.04829	0.34358	0.20329	0.11	0.67223	0	20	xfarahmand913	0.11148	0.09868	0.07665	0.36888	0.23392	0.2	0.68921	0	7
50-50	en	farahmand	minimantics	salehi	1000	surface@stoppy	4	0.10927	0.0957	0.07534	0.34474	0.21693	0.17	0.68172	0	20	xfarahmand913	0.20962	0.18479	0.1438	0.39264	0.31476	0.39	0.77727	0	0
50-50	en	farahmand	minimantics	salehi	1000	surface@stoppy	8	0.11401	0.10615	0.08377	0.35632	0.21813	0.18	0.68338	0	20	xfarahmand913	0.22812	0.20424	0.15929	0.40275	0.34172	0.36	0.81666	0	0
50-50	en	farahmand	minimantics	PPMIthreshold	250	lemma	1	0.2032	0.20667	0.162	0.39362	0.28656	0.38	0.72497	0	8	xfarahmand913	0.27981	0.29797	0.23212	0.45316	0.46447	0.56	0.83505	0	0
50-50	en	farahmand	minimantics	PPMIthreshold	250	lemma	4	0.19521	0.18718	0.14603	0.38119	0.28653	0.35	0.7265	0	6	xfarahmand913	0.26797	0.27232	0.21148	0.44335	0.45179	0.58	0.86202	0	0
50-50	en	farahmand	minimantics	PPMIthreshold	250	lemma	8	0.18752	0.16834	0.13196	0.36307	0.27256	0.32	0.7207	0	6	xfarahmand913	0.2641	0.26003	0.20224	0.42049	0.43256	0.55	0.85937	0	0
50-50	en	farahmand	minimantics	PPMIthreshold	250	lemmapos	1	0.19928	0.20388	0.16047	0.38731	0.27865	0.34	0.72036	8	8	xfarahmand913	0.27526	0.29569	0.23128	0.44845	0.44407	0.55	0.84193	7	0
50-50	en	farahmand	minimantics	PPMIthreshold	250	lemmapos	4	0.19627	0.18955	0.14866	0.38148	0.27937	0.35	0.72323	8	6	xfarahmand913	0.27001	0.27757	0.21647	0.44084	0.43005	0.56	0.83814	7	0
50-50	en	farahmand	minimantics	PPMIthreshold	250	lemmapos	8	0.19275	0.17885	0.1404	0.37062	0.27394	0.31	0.72331	8	6	xfarahmand913	0.2706	0.27207	0.21188	0.43187	0.43239	0.59	0.85422	7	0
50-50	en	farahmand	minimantics	PPMIthreshold	250	surface	1	0.15869	0.17043	0.1339	0.38108	0.25888	0.29	0.70588	0	19	xfarahmand913	0.21814	0.24946	0.19482	0.42915	0.3676	0.47	0.80216	0	0
50-50	en	farahmand	minimantics	PPMIthreshold	250	surface	4	0.14694	0.14643	0.11432	0.37525	0.26033	0.31	0.71323	0	14	xfarahmand913	0.20937	0.22913	0.17787	0.42708	0.39458	0.46	0.83615	0	0
50-50	en	farahmand	minimantics	PPMIthreshold	250	surface	8	0.14201	0.13287	0.10404	0.34211	0.25081	0.3	0.70474	0	14	xfarahmand913	0.2065	0.21798	0.16935	0.39189	0.37877	0.49	0.82557	0	0
50-50	en	farahmand	minimantics	PPMIthreshold	250	surface@stoppy	1	0.15205	0.16549	0.12986	0.38066	0.25632	0.24	0.71839	0	20	xfarahmand913	0.19954	0.22631	0.17666	0.42468	0.32832	0.4	0.77871	0	1
50-50	en	farahmand	minimantics	PPMIthreshold	250	surface@stoppy	4	0.16182	0.17306	0.13531	0.38163	0.26664	0.31	0.71027	0	14	xfarahmand913	0.22618	0.25631	0.19927	0.44105	0.40177	0.51	0.82704	0	0
50-50	en	farahmand	minimantics	PPMIthreshold	250	surface@stoppy	8	0.1495	0.14519	0.11327	0.3609	0.25978	0.33	0.71201	0	14	xfarahmand913	0.21501	0.22968	0.17806	0.41882	0.39757	0.51	0.83317	0	0
50-50	en	farahmand	minimantics	PPMIthreshold	750	lemma	1	0.20227	0.21373	0.16861	0.39875	0.27308	0.25	0.71514	0	8	xfarahmand913	0.29622	0.31757	0.24888	0.46973	0.43453	0.55	0.82021	0	0
50-50	en	farahmand	minimantics	PPMIthreshold	750	lemma	4	0.19849	0.2041	0.15987	0.40449	0.28707	0.39	0.7197	0	6	xfarahmand913	0.27794	0.29746	0.2315	0.47202	0.476	0.59	0.86856	0	0
50-50	en	farahmand	minimantics	PPMIthreshold	750	lemma	8	0.18886	0.18529	0.1451	0.39367	0.28328	0.34	0.72312	0	6	xfarahmand913	0.26432	0.27537	0.21407	0.46857	0.45779	0.59	0.86737	0	0
50-50	en	farahmand	minimantics	PPMIthreshold	750	lemmapos	1	0.19873	0.20846	0.16472	0.39757	0.26611	0.27	0.70979	8	8	xfarahmand913	0.29186	0.31265	0.24529	0.46067	0.42646	0.55	0.8277	7	0
50-50	en	farahmand	minimantics	PPMIthreshold	750	lemmapos	4	0.19462	0.19868	0.15596	0.39787	0.27871	0.34	0.71664	8	6	xfarahmand913	0.27399	0.29369	0.22911	0.46429	0.45381	0.58	0.86162	7	0
50-50	en	farahmand	minimantics	PPMIthreshold	750	lemmapos	8	0.18163	0.17521	0.13776	0.37445	0.27052	0.35	0.7164	8	6	xfarahmand913	0.25692	0.26676	0.20787	0.44507	0.4343	0.55	0.85347	7	0
50-50	en	farahmand	minimantics	PPMIthreshold	750	surface	1	0.16024	0.16565	0.13034	0.37872	0.25251	0.28	0.70425	0	19	xfarahmand913	0.23308	0.25661	0.20046	0.43137	0.37499	0.44	0.79163	0	0
50-50	en	farahmand	minimantics	PPMIthreshold	750	surface	4	0.15805	0.16913	0.13237	0.38462	0.26121	0.32	0.70654	0	14	xfarahmand913	0.23117	0.26155	0.20336	0.44499	0.42457	0.52	0.85015	0	0
50-50	en	farahmand	minimantics	PPMIthreshold	750	surface	8	0.14671	0.14557	0.114	0.36458	0.2568	0.34	0.70647	0	14	xfarahmand913	0.21597	0.23419	0.18161	0.42174	0.41773	0.51	0.85339	0	0
50-50	en	farahmand	minimantics	PPMIthreshold	750	surface@stoppy	1	0.14393	0.14504	0.11385	0.36928	0.2416	0.22	0.70764	0	20	xfarahmand913	0.20164	0.21423	0.16722	0.41176	0.31848	0.39	0.77121	0	1
50-50	en	farahmand	minimantics	PPMIthreshold	750	surface@stoppy	4	0.16008	0.1754	0.13741	0.38879	0.2589	0.27	0.70362	0	14	xfarahmand913	0.23759	0.27083	0.21074	0.45178	0.41506	0.51	0.84027	0	0
50-50	en	farahmand	minimantics	PPMIthreshold	750	surface@stoppy	8	0.15483	0.16664	0.13084	0.38448	0.26124	0.29	0.70674	0	14	xfarahmand913	0.22945	0.26159	0.20365	0.447	0.42475	0.54	0.84733	0	0
50-50	en	farahmand	minimantics	PPMIthreshold	500	lemma	1	0.19864	0.21034	0.1651	0.40432	0.27316	0.27	0.71405	0	8	xfarahmand913	0.28596	0.31003	0.24177	0.47031	0.43606	0.55	0.82273	0	0
50-50	en	farahmand	minimantics	PPMIthreshold	500	lemma	4	0.19657	0.19058	0.14853	0.38211	0.29145	0.39	0.72918	0	6	xfarahmand913	0.27255	0.28098	0.21784	0.45524	0.474	0.61	0.87338	0	0
50-50	en	farahmand	minimantics	PPMIthreshold	500	lemma	8	0.18759	0.17104	0.13358	0.36885	0.28398	0.39	0.72754	0	6	xfarahmand913	0.26049	0.25821	0.20033	0.43411	0.44813	0.59	0.86465	0	0
50-50	en	farahmand	minimantics	PPMIthreshold	500	lemmapos	1	0.19316	0.2031	0.15955	0.40246	0.26672	0.26	0.70819	8	8	xfarahmand913	0.27991	0.30268	0.23618	0.46247	0.42434	0.56	0.82813	7	0
50-50	en	farahmand	minimantics	PPMIthreshold	500	lemmapos	4	0.19106	0.18751	0.1467	0.38476	0.27761	0.36	0.71741	8	6	xfarahmand913	0.26804	0.27877	0.21669	0.45521	0.44667	0.58	0.8594	7	0
50-50	en	farahmand	minimantics	PPMIthreshold	500	lemmapos	8	0.18715	0.17057	0.13385	0.36538	0.27307	0.35	0.72191	8	6	xfarahmand913	0.26249	0.2606	0.20277	0.43099	0.42873	0.56	0.85338	7	0
50-50	en	farahmand	minimantics	PPMIthreshold	500	surface	1	0.16384	0.17032	0.1338	0.37829	0.25673	0.28	0.7056	0	19	xfarahmand913	0.23395	0.25785	0.20116	0.43404	0.38042	0.47	0.80602	0	0
50-50	en	farahmand	minimantics	PPMIthreshold	500	surface	4	0.15561	0.15966	0.12487	0.36806	0.265	0.33	0.71094	0	14	xfarahmand913	0.22366	0.24713	0.19187	0.42752	0.41826	0.52	0.84335	0	0
50-50	en	farahmand	minimantics	PPMIthreshold	500	surface	8	0.14783	0.14148	0.11037	0.36564	0.25807	0.34	0.70989	0	14	xfarahmand913	0.21489	0.22881	0.17722	0.42971	0.40682	0.46	0.84751	0	0
50-50	en	farahmand	minimantics	PPMIthreshold	500	surface@stoppy	1	0.15472	0.16067	0.12646	0.37448	0.25232	0.23	0.71769	0	20	xfarahmand913	0.21157	0.22923	0.17927	0.41681	0.33486	0.42	0.78375	0	1
50-50	en	farahmand	minimantics	PPMIthreshold	500	surface@stoppy	4	0.15969	0.17562	0.13758	0.39319	0.25961	0.28	0.70431	0	14	xfarahmand913	0.23374	0.26972	0.20979	0.45783	0.41877	0.53	0.84731	0	0
50-50	en	farahmand	minimantics	PPMIthreshold	500	surface@stoppy	8	0.15489	0.15887	0.12423	0.37387	0.26529	0.31	0.71247	0	14	xfarahmand913	0.22442	0.24782	0.19217	0.44275	0.4189	0.53	0.84367	0	0
50-50	en	farahmand	dissect	svd	250	lemma	1	0.21482	0.21774	0.17155	0.39633	0.27372	0.29	0.71253	0	0	xfarahmand913	0.34781	0.31753	0.24824	0.46118	0.43401	0.52	0.82281	0	0
50-50	en	farahmand	dissect	svd	250	lemma	4	0.28518	0.27203	0.2138	0.42692	0.32131	0.38	0.74808	0	0	xfarahmand913	0.40651	0.36914	0.28865	0.4955	0.50347	0.61	0.88063	0	0
50-50	en	farahmand	dissect	svd	250	lemma	8	0.3015	0.28366	0.22304	0.44589	0.33773	0.42	0.74898	0	0	xfarahmand913	0.41568	0.37461	0.29297	0.50928	0.51308	0.65	0.88191	0	0
50-50	en	farahmand	dissect	svd	250	lemmapos	1	0.18026	0.17166	0.13461	0.36765	0.25958	0.29	0.71299	0	0	xfarahmand913	0.26668	0.244	0.19078	0.41227	0.34904	0.49	0.77786	0	0
50-50	en	farahmand	dissect	svd	250	lemmapos	4	0.21614	0.22783	0.17901	0.39812	0.27757	0.29	0.7124	0	0	xfarahmand913	0.35238	0.3235	0.25314	0.45972	0.42365	0.56	0.83274	0	0
50-50	en	farahmand	dissect	svd	250	lemmapos	8	0.23701	0.24745	0.19489	0.4014	0.28912	0.32	0.71888	0	0	xfarahmand913	0.36346	0.33704	0.26426	0.46005	0.42589	0.54	0.81756	0	0
50-50	en	farahmand	dissect	svd	250	surface	1	0.16752	0.17244	0.1361	0.37544	0.24974	0.26	0.70035	0	0	xfarahmand913	0.28406	0.26454	0.2069	0.42356	0.37702	0.45	0.81666	0	0
50-50	en	farahmand	dissect	svd	250	surface	4	0.2305	0.22916	0.18068	0.39859	0.29086	0.34	0.72561	0	0	xfarahmand913	0.34826	0.32004	0.25063	0.45553	0.4444	0.54	0.85271	0	0
50-50	en	farahmand	dissect	svd	250	surface	8	0.24045	0.23758	0.18747	0.40167	0.30193	0.4	0.73001	0	0	xfarahmand913	0.35639	0.32468	0.25448	0.45876	0.45845	0.59	0.86064	0	0
50-50	en	farahmand	dissect	svd	250	surface@stoppy	1	0.13553	0.12914	0.1004	0.35928	0.23335	0.22	0.6916	0	0	xfarahmand913	0.2157	0.19755	0.15293	0.40084	0.30809	0.36	0.76216	0	0
50-50	en	farahmand	dissect	svd	250	surface@stoppy	4	0.20569	0.21362	0.16861	0.39506	0.27335	0.31	0.71316	0	0	xfarahmand913	0.33535	0.30778	0.24095	0.4461	0.43133	0.51	0.85532	0	0
50-50	en	farahmand	dissect	svd	250	surface@stoppy	8	0.23097	0.2306	0.18167	0.39456	0.29159	0.35	0.72663	0	0	xfarahmand913	0.35141	0.32049	0.25104	0.45361	0.44894	0.55	0.85767	0	0
50-50	en	farahmand	dissect	svd	750	lemma	1	0.23927	0.24589	0.19411	0.4227	0.28325	0.3	0.71694	0	0	xfarahmand913	0.36598	0.35411	0.27761	0.48924	0.45651	0.55	0.82901	0	0
50-50	en	farahmand	dissect	svd	750	lemma	4	0.29289	0.28688	0.22522	0.44646	0.33439	0.41	0.74688	0	0	xfarahmand913	0.39903	0.38216	0.29854	0.52018	0.52678	0.63	0.89024	0	0
50-50	en	farahmand	dissect	svd	750	lemma	8	0.29849	0.28736	0.22578	0.44771	0.34705	0.46	0.75358	0	0	xfarahmand913	0.39317	0.37242	0.29096	0.51089	0.52194	0.65	0.88838	0	0
50-50	en	farahmand	dissect	svd	750	lemmapos	1	0.13917	0.12616	0.09879	0.35063	0.23963	0.27	0.70374	0	0	xfarahmand913	0.21405	0.19639	0.15309	0.38898	0.32439	0.44	0.77599	0	0
50-50	en	farahmand	dissect	svd	750	lemmapos	4	0.15995	0.15561	0.12262	0.36383	0.24039	0.24	0.69393	0	0	xfarahmand913	0.27812	0.25665	0.20075	0.41068	0.37007	0.45	0.80472	0	0
50-50	en	farahmand	dissect	svd	750	lemmapos	8	0.17581	0.17464	0.13774	0.37152	0.24669	0.25	0.69623	0	0	xfarahmand913	0.29232	0.27416	0.21476	0.43129	0.36628	0.47	0.78372	0	0
50-50	en	farahmand	dissect	svd	750	surface	1	0.20964	0.21355	0.16944	0.40116	0.26765	0.28	0.71031	0	0	xfarahmand913	0.32343	0.31406	0.24724	0.45375	0.41824	0.5	0.83305	0	0
50-50	en	farahmand	dissect	svd	750	surface	4	0.25864	0.27008	0.21335	0.42396	0.30758	0.36	0.73007	0	0	xfarahmand913	0.37681	0.36944	0.2898	0.49091	0.48633	0.61	0.87396	0	0
50-50	en	farahmand	dissect	svd	750	surface	8	0.2732	0.28385	0.22451	0.43494	0.32449	0.38	0.73634	0	0	xfarahmand913	0.38349	0.37645	0.29577	0.50228	0.49801	0.65	0.87213	0	0
50-50	en	farahmand	dissect	svd	750	surface@stoppy	1	0.16806	0.16449	0.12953	0.38509	0.24658	0.21	0.70076	0	0	xfarahmand913	0.24425	0.23775	0.18598	0.42987	0.33313	0.4	0.78077	0	0
50-50	en	farahmand	dissect	svd	750	surface@stoppy	4	0.23126	0.24481	0.19367	0.41555	0.28385	0.31	0.71503	0	0	xfarahmand913	0.35824	0.3485	0.27372	0.48558	0.45372	0.53	0.8615	0	0
50-50	en	farahmand	dissect	svd	750	surface@stoppy	8	0.25879	0.26941	0.21269	0.42561	0.30735	0.35	0.73072	0	0	xfarahmand913	0.37711	0.36756	0.28848	0.48954	0.48316	0.6	0.86763	0	0
50-50	en	farahmand	dissect	svd	500	lemma	1	0.22894	0.23369	0.18415	0.41739	0.27765	0.29	0.7128	0	0	xfarahmand913	0.35989	0.33993	0.26596	0.48059	0.4473	0.55	0.8267	0	0
50-50	en	farahmand	dissect	svd	500	lemma	4	0.29552	0.2861	0.2247	0.4374	0.33078	0.42	0.74425	0	0	xfarahmand913	0.4118	0.3835	0.29969	0.50716	0.52491	0.64	0.8898	0	0
50-50	en	farahmand	dissect	svd	500	lemma	8	0.30844	0.29428	0.23123	0.44367	0.3492	0.45	0.75334	0	0	xfarahmand913	0.41271	0.38197	0.29845	0.5084	0.5357	0.67	0.89302	0	0
50-50	en	farahmand	dissect	svd	500	lemmapos	1	0.15488	0.14205	0.11124	0.3562	0.24781	0.29	0.71045	0	0	xfarahmand913	0.23472	0.21475	0.16755	0.3959	0.33991	0.42	0.78275	0	0
50-50	en	farahmand	dissect	svd	500	lemmapos	4	0.18489	0.18655	0.1467	0.37202	0.25745	0.28	0.70315	0	0	xfarahmand913	0.30871	0.28511	0.22299	0.42676	0.39898	0.5	0.82286	0	0
50-50	en	farahmand	dissect	svd	500	lemmapos	8	0.20038	0.2038	0.16057	0.38188	0.2628	0.28	0.70577	0	0	xfarahmand913	0.31915	0.29939	0.23448	0.43738	0.39002	0.48	0.79923	0	0
50-50	en	farahmand	dissect	svd	500	surface	1	0.19389	0.1956	0.15461	0.38646	0.26063	0.26	0.7062	0	0	xfarahmand913	0.30946	0.29195	0.229	0.43983	0.39918	0.46	0.82429	0	0
50-50	en	farahmand	dissect	svd	500	surface	4	0.24622	0.252	0.19863	0.41653	0.30028	0.37	0.72801	0	0	xfarahmand913	0.36682	0.34853	0.27294	0.4749	0.47022	0.59	0.86688	0	0
50-50	en	farahmand	dissect	svd	500	surface	8	0.25479	0.25889	0.20449	0.41221	0.31157	0.4	0.7312	0	0	xfarahmand913	0.3713	0.34921	0.27397	0.47134	0.4783	0.63	0.86635	0	0
50-50	en	farahmand	dissect	svd	500	surface@stoppy	1	0.15425	0.14903	0.11701	0.37518	0.24147	0.24	0.70376	0	0	xfarahmand913	0.23366	0.22186	0.17299	0.42123	0.32401	0.38	0.77594	0	0
50-50	en	farahmand	dissect	svd	500	surface@stoppy	4	0.22324	0.23433	0.1851	0.40927	0.27983	0.3	0.71448	0	0	xfarahmand913	0.35181	0.33604	0.26343	0.48139	0.44442	0.52	0.85689	0	0
50-50	en	farahmand	dissect	svd	500	surface@stoppy	8	0.24901	0.25212	0.19888	0.41357	0.30086	0.37	0.72903	0	0	xfarahmand913	0.37006	0.34681	0.27193	0.47619	0.47162	0.62	0.86384	0	0
50-50	en	farahmand	glove.avg	default	250	lemma	1	0.00529	0.02973	0.02425	0.33843	0.19102	0.1	0.66632	0	20	xfarahmand913	0.10356	0.10892	0.08528	0.37657	0.23732	0.24	0.70429	0	0
50-50	en	farahmand	glove.avg	default	250	lemma	4	0.02321	0.0563	0.04521	0.34615	0.20227	0.13	0.67711	0	20	xfarahmand913	0.14151	0.14046	0.10995	0.3908	0.26012	0.21	0.72719	0	0
50-50	en	farahmand	glove.avg	default	250	lemma	8	0.03512	0.06977	0.05567	0.35054	0.20796	0.14	0.68112	0	20	xfarahmand913	0.1642	0.15619	0.12198	0.39655	0.27237	0.24	0.74295	0	0
50-50	en	farahmand	glove.avg	default	250	lemmapos	1	-0.00376	0.01019	0.00974	0.33851	0.18538	0.1	0.66157	5	15	xfarahmand913	0.08428	0.08523	0.06786	0.37371	0.22664	0.17	0.70488	15	0
50-50	en	farahmand	glove.avg	default	250	lemmapos	4	0.01874	0.04626	0.03767	0.34146	0.19803	0.13	0.67128	5	15	xfarahmand913	0.13134	0.1287	0.10144	0.38179	0.24864	0.2	0.70765	15	0
50-50	en	farahmand	glove.avg	default	250	lemmapos	8	0.03144	0.06308	0.05066	0.34716	0.2035	0.13	0.67383	5	15	xfarahmand913	0.15696	0.14931	0.11718	0.38768	0.26415	0.22	0.7369	15	0
50-50	en	farahmand	glove.avg	default	250	surface	1	0.0295	0.03625	0.02864	0.3319	0.19595	0.14	0.67173	0	20	xfarahmand913	0.05479	0.0619	0.04915	0.36724	0.21939	0.17	0.68675	0	0
50-50	en	farahmand	glove.avg	default	250	surface	4	0.0392	0.05	0.03965	0.32941	0.20142	0.18	0.68322	0	20	xfarahmand913	0.07274	0.07933	0.06264	0.36591	0.22847	0.2	0.70992	0	0
50-50	en	farahmand	glove.avg	default	250	surface	8	-0.03762	-0.0455	-0.03573	0.32626	0.18664	0.2	0.67309	0	20	xfarahmand913	-0.0379	-0.04534	-0.03533	0.35262	0.20105	0.21	0.67755	0	0
50-50	en	farahmand	glove.avg	default	250	surface@stoppy	1	0.04974	0.05578	0.04371	0.32854	0.20329	0.16	0.67924	0	20	xfarahmand913	0.06277	0.06519	0.05097	0.36364	0.22106	0.18	0.69107	0	0
50-50	en	farahmand	glove.avg	default	250	surface@stoppy	4	0.0381	0.04034	0.03207	0.33191	0.19767	0.18	0.67464	0	20	xfarahmand913	0.05251	0.05503	0.0439	0.36047	0.21667	0.19	0.68502	0	0
50-50	en	farahmand	glove.avg	default	250	surface@stoppy	8	0.0574	0.0728	0.05783	0.33855	0.20713	0.19	0.68206	0	20	xfarahmand913	0.07622	0.1038	0.08189	0.37288	0.23121	0.19	0.70096	0	0
50-50	en	farahmand	glove.avg	default	750	lemma	1	0.00639	0.03648	0.03005	0.34751	0.191	0.13	0.66389	0	20	xfarahmand913	0.10517	0.11703	0.09231	0.39244	0.23717	0.2	0.70088	0	0
50-50	en	farahmand	glove.avg	default	750	lemma	4	0.02671	0.07494	0.05983	0.34624	0.20466	0.12	0.67662	0	20	xfarahmand913	0.15008	0.16265	0.12749	0.39124	0.26337	0.21	0.72797	0	0
50-50	en	farahmand	glove.avg	default	750	lemma	8	0.04045	0.08627	0.06863	0.35323	0.21049	0.14	0.68223	0	20	xfarahmand913	0.176	0.1757	0.13744	0.40059	0.27722	0.25	0.75225	0	0
50-50	en	farahmand	glove.avg	default	750	lemmapos	1	0.00472	0.02727	0.02325	0.34409	0.18804	0.11	0.66255	5	15	xfarahmand913	0.09628	0.10585	0.08409	0.38333	0.22924	0.17	0.69243	15	0
50-50	en	farahmand	glove.avg	default	750	lemmapos	4	0.02536	0.06433	0.05249	0.35095	0.2013	0.12	0.67213	5	15	xfarahmand913	0.14312	0.15133	0.11978	0.39424	0.25274	0.21	0.7065	15	0
50-50	en	farahmand	glove.avg	default	750	lemmapos	8	0.03722	0.08223	0.06609	0.35808	0.207	0.13	0.67634	5	15	xfarahmand913	0.16767	0.17167	0.13523	0.40051	0.26555	0.24	0.72387	15	0
50-50	en	farahmand	glove.avg	default	750	surface	1	0.02505	0.03175	0.02577	0.33589	0.19391	0.15	0.6697	0	20	xfarahmand913	0.05001	0.06011	0.04813	0.36758	0.21841	0.16	0.68536	0	0
50-50	en	farahmand	glove.avg	default	750	surface	4	0.04527	0.06414	0.05069	0.3339	0.20389	0.17	0.67873	0	20	xfarahmand913	0.08026	0.09564	0.07552	0.36836	0.23145	0.19	0.71076	0	0
50-50	en	farahmand	glove.avg	default	750	surface	8	0.06106	0.08205	0.06474	0.33987	0.21266	0.19	0.70287	0	20	xfarahmand913	0.0992	0.11119	0.08739	0.37381	0.24524	0.2	0.73554	0	0
50-50	en	farahmand	glove.avg	default	750	surface@stoppy	1	0.04789	0.05175	0.04081	0.33244	0.20024	0.16	0.6784	0	20	xfarahmand913	0.06085	0.0651	0.05091	0.36613	0.21896	0.17	0.69202	0	0
50-50	en	farahmand	glove.avg	default	750	surface@stoppy	4	0.03705	0.03914	0.03137	0.33134	0.19554	0.16	0.67057	0	20	xfarahmand913	0.05157	0.06205	0.04936	0.36384	0.21596	0.16	0.68026	0	0
50-50	en	farahmand	glove.avg	default	750	surface@stoppy	8	0.05956	0.07928	0.06285	0.34073	0.20951	0.19	0.68413	0	20	xfarahmand913	0.07881	0.11093	0.08774	0.37661	0.23427	0.19	0.71279	0	0
50-50	en	farahmand	glove.avg	default	500	lemma	1	0.00706	0.03404	0.02839	0.34178	0.19103	0.13	0.66501	0	20	xfarahmand913	0.10553	0.11448	0.09042	0.38393	0.23743	0.21	0.70114	0	0
50-50	en	farahmand	glove.avg	default	500	lemma	4	0.02392	0.06775	0.05425	0.34936	0.20281	0.12	0.67459	0	20	xfarahmand913	0.14488	0.15509	0.12154	0.3956	0.26127	0.2	0.72761	0	0
50-50	en	farahmand	glove.avg	default	500	lemma	8	0.03732	0.08154	0.06513	0.35714	0.20954	0.14	0.68156	0	20	xfarahmand913	0.17105	0.17114	0.13407	0.40597	0.27538	0.24	0.74884	0	0
50-50	en	farahmand	glove.avg	default	500	lemmapos	1	0.00247	0.02253	0.01937	0.34332	0.18745	0.1	0.66305	5	15	xfarahmand913	0.09339	0.09986	0.07912	0.37861	0.22912	0.18	0.69656	15	0
50-50	en	farahmand	glove.avg	default	500	lemmapos	4	0.02133	0.05371	0.04382	0.34624	0.19881	0.13	0.67114	5	15	xfarahmand913	0.13633	0.13826	0.10926	0.38588	0.24956	0.21	0.70738	15	0
50-50	en	farahmand	glove.avg	default	500	lemmapos	8	0.0351	0.07601	0.06101	0.3541	0.20623	0.12	0.67642	5	15	xfarahmand913	0.16319	0.16489	0.12969	0.39589	0.26451	0.23	0.7205	15	0
50-50	en	farahmand	glove.avg	default	500	surface	1	0.02201	0.02975	0.02407	0.33193	0.19291	0.15	0.66978	0	20	xfarahmand913	0.04665	0.05708	0.04563	0.36458	0.21695	0.18	0.68562	0	0
50-50	en	farahmand	glove.avg	default	500	surface	4	0.0395	0.05472	0.04336	0.33249	0.20237	0.17	0.68332	0	20	xfarahmand913	0.0736	0.08336	0.06584	0.36364	0.22862	0.2	0.70966	0	0
50-50	en	farahmand	glove.avg	default	500	surface	8	0.05529	0.07089	0.0563	0.3379	0.20965	0.18	0.69872	0	20	xfarahmand913	0.09248	0.10358	0.08158	0.37889	0.24113	0.2	0.72038	0	0
50-50	en	farahmand	glove.avg	default	500	surface@stoppy	1	0.04892	0.05188	0.0412	0.33154	0.20036	0.15	0.6797	0	20	xfarahmand913	0.06172	0.06481	0.05084	0.36869	0.21854	0.16	0.6911	0	0
50-50	en	farahmand	glove.avg	default	500	surface@stoppy	4	0.03765	0.0387	0.03069	0.33047	0.19674	0.15	0.67233	0	20	xfarahmand913	0.05216	0.06071	0.04824	0.36283	0.21672	0.16	0.682	0	0
50-50	en	farahmand	glove.avg	default	500	surface@stoppy	8	0.05816	0.08088	0.06404	0.34578	0.2094	0.19	0.68283	0	20	xfarahmand913	0.07738	0.10959	0.08676	0.38138	0.23252	0.19	0.70114	0	0
50-50	en	farahmand	glove.run1	default	250	lemma	1	0.00828	0.03277	0.02673	0.33692	0.19155	0.12	0.66651	0	20	xfarahmand913	0.10753	0.1114	0.08737	0.37247	0.23872	0.25	0.70705	0	0
50-50	en	farahmand	glove.run1	default	250	lemma	4	0.0258	0.06396	0.05108	0.35194	0.20459	0.12	0.67845	0	20	xfarahmand913	0.14587	0.14844	0.11607	0.39826	0.263	0.23	0.72671	0	0
50-50	en	farahmand	glove.run1	default	250	lemma	8	0.03626	0.07039	0.05608	0.34554	0.20829	0.14	0.68199	0	20	xfarahmand913	0.16557	0.15608	0.12198	0.39124	0.2767	0.24	0.75569	0	0
50-50	en	farahmand	glove.run1	default	250	lemmapos	1	-0.00479	0.01122	0.01039	0.34123	0.18511	0.1	0.66202	5	15	xfarahmand913	0.08348	0.08665	0.06867	0.38109	0.22543	0.19	0.69413	15	0
50-50	en	farahmand	glove.run1	default	250	lemmapos	4	0.01931	0.04793	0.03914	0.3428	0.19777	0.13	0.67069	5	15	xfarahmand913	0.13219	0.13118	0.10358	0.38187	0.24791	0.21	0.70628	15	0
50-50	en	farahmand	glove.run1	default	250	lemmapos	8	0.03169	0.06541	0.05236	0.34538	0.20406	0.13	0.67468	5	15	xfarahmand913	0.15777	0.15071	0.11824	0.38889	0.26468	0.2	0.738	15	0
50-50	en	farahmand	glove.run1	default	250	surface	1	0.0282	0.03443	0.0273	0.33247	0.19518	0.14	0.6713	0	110	xfarahmand913	0.05339	0.06076	0.04832	0.36437	0.21874	0.17	0.68642	0	0
50-50	en	farahmand	glove.run1	default	250	surface	4	0.0391	0.04807	0.03832	0.33	0.20063	0.17	0.67758	0	110	xfarahmand913	0.07283	0.07775	0.06138	0.36433	0.22749	0.21	0.69923	0	0
50-50	en	farahmand	glove.run1	default	250	surface	8	0.05267	0.06204	0.04914	0.33221	0.20707	0.17	0.6843	0	110	xfarahmand913	0.0882	0.09367	0.07354	0.36692	0.23879	0.2	0.7169	0	0
50-50	en	farahmand	glove.run1	default	250	surface@stoppy	1	0.05279	0.05823	0.04557	0.33261	0.20382	0.16	0.67762	0	20	xfarahmand913	0.06613	0.07053	0.05512	0.37009	0.2218	0.16	0.68741	0	0
50-50	en	farahmand	glove.run1	default	250	surface@stoppy	4	0.03835	0.04195	0.03319	0.33133	0.19827	0.18	0.67471	0	20	xfarahmand913	0.05289	0.05527	0.04394	0.36038	0.21691	0.19	0.6845	0	0
50-50	en	farahmand	glove.run1	default	250	surface@stoppy	8	0.04729	0.05271	0.04194	0.33036	0.20332	0.16	0.67943	0	20	xfarahmand913	0.06388	0.07254	0.05765	0.36153	0.22405	0.16	0.69203	0	0
50-50	en	farahmand	glove.run1	default	750	lemma	1	0.0095	0.03905	0.03209	0.34462	0.1918	0.12	0.66519	0	20	xfarahmand913	0.10885	0.12104	0.09544	0.38558	0.23786	0.24	0.69895	0	0
50-50	en	farahmand	glove.run1	default	750	lemma	4	0.02952	0.07724	0.06196	0.35419	0.20506	0.12	0.67697	0	20	xfarahmand913	0.15313	0.16734	0.13144	0.39944	0.26343	0.2	0.72582	0	0
50-50	en	farahmand	glove.run1	default	750	lemma	8	0.03973	0.0871	0.0693	0.35105	0.21	0.13	0.6819	0	20	xfarahmand913	0.17534	0.17907	0.14013	0.39881	0.27673	0.24	0.75061	0	0
50-50	en	farahmand	glove.run1	default	750	lemmapos	1	0.00375	0.02649	0.02256	0.34413	0.1881	0.11	0.6628	5	15	xfarahmand913	0.09542	0.10486	0.08328	0.38633	0.23038	0.17	0.70639	15	0
50-50	en	farahmand	glove.run1	default	750	lemmapos	4	0.0229	0.0614	0.04982	0.34809	0.19985	0.13	0.67166	5	15	xfarahmand913	0.14053	0.1476	0.11648	0.38845	0.25118	0.21	0.70724	15	0
50-50	en	farahmand	glove.run1	default	750	lemmapos	8	0.04008	0.08711	0.07005	0.35769	0.2087	0.13	0.67744	5	15	xfarahmand913	0.172	0.17761	0.14009	0.4	0.26999	0.26	0.73748	15	0
50-50	en	farahmand	glove.run1	default	750	surface	1	0.02412	0.03126	0.02534	0.33679	0.19359	0.14	0.66935	0	110	xfarahmand913	0.04924	0.05731	0.04592	0.36595	0.21727	0.16	0.68459	0	0
50-50	en	farahmand	glove.run1	default	750	surface	4	0.0424	0.05712	0.04527	0.33333	0.20347	0.17	0.68045	0	110	xfarahmand913	0.07755	0.0892	0.07037	0.36938	0.23082	0.2	0.71068	0	0
50-50	en	farahmand	glove.run1	default	750	surface	8	0.06075	0.08069	0.06373	0.33605	0.2125	0.18	0.70206	0	110	xfarahmand913	0.09914	0.1124	0.08845	0.36944	0.24572	0.2	0.73584	0	0
50-50	en	farahmand	glove.run1	default	750	surface@stoppy	1	0.04772	0.05196	0.04118	0.33059	0.19985	0.15	0.67779	0	20	xfarahmand913	0.06075	0.06449	0.05069	0.36543	0.21798	0.17	0.69127	0	0
50-50	en	farahmand	glove.run1	default	750	surface@stoppy	4	0.03665	0.04256	0.03385	0.33269	0.19724	0.15	0.6718	0	20	xfarahmand913	0.05156	0.063	0.05026	0.36566	0.21634	0.16	0.68091	0	0
50-50	en	farahmand	glove.run1	default	750	surface@stoppy	8	0.05129	0.06279	0.05003	0.33302	0.20428	0.15	0.67626	0	20	xfarahmand913	0.06857	0.08661	0.06864	0.3677	0.22514	0.16	0.68663	0	0
50-50	en	farahmand	glove.run1	default	500	lemma	1	0.00301	0.03089	0.02556	0.34009	0.19031	0.12	0.66415	0	20	xfarahmand913	0.09978	0.11055	0.08705	0.38109	0.23564	0.22	0.69846	0	0
50-50	en	farahmand	glove.run1	default	500	lemma	4	0.0239	0.06306	0.05073	0.34924	0.20219	0.12	0.67483	0	20	xfarahmand913	0.1441	0.15081	0.11829	0.39335	0.26	0.21	0.72578	0	0
50-50	en	farahmand	glove.run1	default	500	lemma	8	0.03676	0.08091	0.06454	0.351	0.20962	0.14	0.68189	0	20	xfarahmand913	0.16849	0.16954	0.13277	0.39712	0.27594	0.24	0.75181	0	0
50-50	en	farahmand	glove.run1	default	500	lemmapos	1	0.00291	0.01936	0.01687	0.34191	0.18689	0.11	0.66319	5	15	xfarahmand913	0.0933	0.09691	0.0769	0.3815	0.22943	0.17	0.70792	15	0
50-50	en	farahmand	glove.run1	default	500	lemmapos	4	0.01862	0.05078	0.04146	0.35062	0.1981	0.13	0.67081	5	15	xfarahmand913	0.13261	0.13421	0.10595	0.38936	0.24845	0.2	0.70971	15	0
50-50	en	farahmand	glove.run1	default	500	lemmapos	8	0.03479	0.07494	0.06053	0.35333	0.20594	0.13	0.67605	5	15	xfarahmand913	0.16385	0.16376	0.1292	0.39532	0.26561	0.22	0.73572	15	0
50-50	en	farahmand	glove.run1	default	500	surface	1	0.0233	0.03248	0.02592	0.33559	0.19359	0.15	0.66964	0	20	xfarahmand913	0.04817	0.05862	0.04673	0.36398	0.2169	0.17	0.68451	0	0
50-50	en	farahmand	glove.run1	default	500	surface	4	0.03863	0.05612	0.04434	0.33305	0.2026	0.17	0.68345	0	20	xfarahmand913	0.07272	0.08439	0.06661	0.36298	0.22867	0.2	0.70965	0	0
50-50	en	farahmand	glove.run1	default	500	surface	8	0.05462	0.07066	0.05595	0.33301	0.20974	0.17	0.69851	0	20	xfarahmand913	0.09158	0.10318	0.08107	0.36896	0.24085	0.2	0.71843	0	0
50-50	en	farahmand	glove.run1	default	500	surface@stoppy	1	0.05024	0.05046	0.04016	0.33026	0.20071	0.15	0.67876	0	20	xfarahmand913	0.06308	0.06462	0.05081	0.36502	0.21931	0.17	0.69226	0	0
50-50	en	farahmand	glove.run1	default	500	surface@stoppy	4	0.03983	0.0453	0.0364	0.33231	0.19831	0.16	0.67273	0	20	xfarahmand913	0.05482	0.06447	0.05144	0.36754	0.21808	0.17	0.68203	0	0
50-50	en	farahmand	glove.run1	default	500	surface@stoppy	8	0.04765	0.05404	0.04314	0.33219	0.20213	0.16	0.67562	0	20	xfarahmand913	0.0642	0.07647	0.06066	0.36782	0.22317	0.18	0.68618	0	0
50-50	en	farahmand	glove.run2	default	250	lemma	1	0.00529	0.02973	0.02425	0.33843	0.19102	0.1	0.66632	0	20	xfarahmand913	0.10356	0.10892	0.08528	0.37657	0.23732	0.24	0.70429	0	0
50-50	en	farahmand	glove.run2	default	250	lemma	4	0.02321	0.0563	0.04521	0.34615	0.20227	0.13	0.67711	0	20	xfarahmand913	0.14151	0.14046	0.10995	0.3908	0.26012	0.21	0.72719	0	0
50-50	en	farahmand	glove.run2	default	250	lemma	8	0.03512	0.06977	0.05567	0.35054	0.20796	0.14	0.68112	0	20	xfarahmand913	0.1642	0.15619	0.12198	0.39655	0.27237	0.24	0.74295	0	0
50-50	en	farahmand	glove.run2	default	250	lemmapos	1	-0.00376	0.01019	0.00974	0.33851	0.18538	0.1	0.66157	5	15	xfarahmand913	0.08428	0.08523	0.06786	0.37371	0.22664	0.17	0.70488	15	0
50-50	en	farahmand	glove.run2	default	250	lemmapos	4	0.01874	0.04626	0.03767	0.34146	0.19803	0.13	0.67128	5	15	xfarahmand913	0.13134	0.1287	0.10144	0.38179	0.24864	0.2	0.70765	15	0
50-50	en	farahmand	glove.run2	default	250	lemmapos	8	0.03144	0.06308	0.05066	0.34716	0.2035	0.13	0.67383	5	15	xfarahmand913	0.15696	0.14931	0.11718	0.38768	0.26415	0.22	0.7369	15	0
50-50	en	farahmand	glove.run2	default	250	surface	1	0.0295	0.03625	0.02864	0.3319	0.19595	0.14	0.67173	0	20	xfarahmand913	0.05479	0.0619	0.04915	0.36724	0.21939	0.17	0.68675	0	0
50-50	en	farahmand	glove.run2	default	250	surface	4	0.0392	0.05	0.03965	0.32941	0.20142	0.18	0.68322	0	20	xfarahmand913	0.07274	0.07933	0.06264	0.36591	0.22847	0.2	0.70992	0	0
50-50	en	farahmand	glove.run2	default	250	surface	8	-0.03762	-0.0455	-0.03573	0.32626	0.18664	0.2	0.67309	0	20	xfarahmand913	-0.0379	-0.04534	-0.03533	0.35262	0.20105	0.21	0.67755	0	0
50-50	en	farahmand	glove.run2	default	250	surface@stoppy	1	0.04974	0.05578	0.04371	0.32854	0.20329	0.16	0.67924	0	20	xfarahmand913	0.06277	0.06519	0.05097	0.36364	0.22106	0.18	0.69107	0	0
50-50	en	farahmand	glove.run2	default	250	surface@stoppy	4	0.0381	0.04034	0.03207	0.33191	0.19767	0.18	0.67464	0	20	xfarahmand913	0.05251	0.05503	0.0439	0.36047	0.21667	0.19	0.68502	0	0
50-50	en	farahmand	glove.run2	default	250	surface@stoppy	8	0.0574	0.0728	0.05783	0.33855	0.20713	0.19	0.68206	0	20	xfarahmand913	0.07622	0.1038	0.08189	0.37288	0.23121	0.19	0.70096	0	0
50-50	en	farahmand	glove.run2	default	750	lemma	1	0.00639	0.03648	0.03005	0.34751	0.191	0.13	0.66389	0	20	xfarahmand913	0.10517	0.11703	0.09231	0.39244	0.23717	0.2	0.70088	0	0
50-50	en	farahmand	glove.run2	default	750	lemma	4	0.02671	0.07494	0.05983	0.34624	0.20466	0.12	0.67662	0	20	xfarahmand913	0.15008	0.16265	0.12749	0.39124	0.26337	0.21	0.72797	0	0
50-50	en	farahmand	glove.run2	default	750	lemma	8	0.04045	0.08627	0.06863	0.35323	0.21049	0.14	0.68223	0	20	xfarahmand913	0.176	0.1757	0.13744	0.40059	0.27722	0.25	0.75225	0	0
50-50	en	farahmand	glove.run2	default	750	lemmapos	1	0.00472	0.02727	0.02325	0.34409	0.18804	0.11	0.66255	5	15	xfarahmand913	0.09628	0.10585	0.08409	0.38333	0.22924	0.17	0.69243	15	0
50-50	en	farahmand	glove.run2	default	750	lemmapos	4	0.02536	0.06433	0.05249	0.35095	0.2013	0.12	0.67213	5	15	xfarahmand913	0.14312	0.15133	0.11978	0.39424	0.25274	0.21	0.7065	15	0
50-50	en	farahmand	glove.run2	default	750	lemmapos	8	0.03722	0.08223	0.06609	0.35808	0.207	0.13	0.67634	5	15	xfarahmand913	0.16767	0.17167	0.13523	0.40051	0.26555	0.24	0.72387	15	0
50-50	en	farahmand	glove.run2	default	750	surface	1	0.02505	0.03175	0.02577	0.33589	0.19391	0.15	0.6697	0	20	xfarahmand913	0.05001	0.06011	0.04813	0.36758	0.21841	0.16	0.68536	0	0
50-50	en	farahmand	glove.run2	default	750	surface	4	0.04527	0.06414	0.05069	0.3339	0.20389	0.17	0.67873	0	20	xfarahmand913	0.08026	0.09564	0.07552	0.36836	0.23145	0.19	0.71076	0	0
50-50	en	farahmand	glove.run2	default	750	surface	8	0.06106	0.08205	0.06474	0.33987	0.21266	0.19	0.70287	0	20	xfarahmand913	0.0992	0.11119	0.08739	0.37381	0.24524	0.2	0.73554	0	0
50-50	en	farahmand	glove.run2	default	750	surface@stoppy	1	0.04789	0.05175	0.04081	0.33244	0.20024	0.16	0.6784	0	20	xfarahmand913	0.06085	0.0651	0.05091	0.36613	0.21896	0.17	0.69202	0	0
50-50	en	farahmand	glove.run2	default	750	surface@stoppy	4	0.03705	0.03914	0.03137	0.33134	0.19554	0.16	0.67057	0	20	xfarahmand913	0.05157	0.06205	0.04936	0.36384	0.21596	0.16	0.68026	0	0
50-50	en	farahmand	glove.run2	default	750	surface@stoppy	8	0.05956	0.07928	0.06285	0.34073	0.20951	0.19	0.68413	0	20	xfarahmand913	0.07881	0.11093	0.08774	0.37661	0.23427	0.19	0.71279	0	0
50-50	en	farahmand	glove.run2	default	500	lemma	1	0.00706	0.03404	0.02839	0.34178	0.19103	0.13	0.66501	0	20	xfarahmand913	0.10553	0.11448	0.09042	0.38393	0.23743	0.21	0.70114	0	0
50-50	en	farahmand	glove.run2	default	500	lemma	4	0.02392	0.06775	0.05425	0.34936	0.20281	0.12	0.67459	0	20	xfarahmand913	0.14488	0.15509	0.12154	0.3956	0.26127	0.2	0.72761	0	0
50-50	en	farahmand	glove.run2	default	500	lemma	8	0.03732	0.08154	0.06513	0.35714	0.20954	0.14	0.68156	0	20	xfarahmand913	0.17105	0.17114	0.13407	0.40597	0.27538	0.24	0.74884	0	0
50-50	en	farahmand	glove.run2	default	500	lemmapos	1	0.00247	0.02253	0.01937	0.34332	0.18745	0.1	0.66305	5	15	xfarahmand913	0.09339	0.09986	0.07912	0.37861	0.22912	0.18	0.69656	15	0
50-50	en	farahmand	glove.run2	default	500	lemmapos	4	0.02133	0.05371	0.04382	0.34624	0.19881	0.13	0.67114	5	15	xfarahmand913	0.13633	0.13826	0.10926	0.38588	0.24956	0.21	0.70738	15	0
50-50	en	farahmand	glove.run2	default	500	lemmapos	8	0.0351	0.07601	0.06101	0.3541	0.20623	0.12	0.67642	5	15	xfarahmand913	0.16319	0.16489	0.12969	0.39589	0.26451	0.23	0.7205	15	0
50-50	en	farahmand	glove.run2	default	500	surface	1	0.02201	0.02975	0.02407	0.33193	0.19291	0.15	0.66978	0	20	xfarahmand913	0.04665	0.05708	0.04563	0.36458	0.21695	0.18	0.68562	0	0
50-50	en	farahmand	glove.run2	default	500	surface	4	0.0395	0.05472	0.04336	0.33249	0.20237	0.17	0.68332	0	20	xfarahmand913	0.0736	0.08336	0.06584	0.36364	0.22862	0.2	0.70966	0	0
50-50	en	farahmand	glove.run2	default	500	surface	8	0.05529	0.07089	0.0563	0.3379	0.20965	0.18	0.69872	0	20	xfarahmand913	0.09248	0.10358	0.08158	0.37889	0.24113	0.2	0.72038	0	0
50-50	en	farahmand	glove.run2	default	500	surface@stoppy	1	0.04892	0.05188	0.0412	0.33154	0.20036	0.15	0.6797	0	20	xfarahmand913	0.06172	0.06481	0.05084	0.36869	0.21854	0.16	0.6911	0	0
50-50	en	farahmand	glove.run2	default	500	surface@stoppy	4	0.03765	0.0387	0.03069	0.33047	0.19674	0.15	0.67233	0	20	xfarahmand913	0.05216	0.06071	0.04824	0.36283	0.21672	0.16	0.682	0	0
50-50	en	farahmand	glove.run2	default	500	surface@stoppy	8	0.05816	0.08088	0.06404	0.34578	0.2094	0.19	0.68283	0	20	xfarahmand913	0.07738	0.10959	0.08676	0.38138	0.23252	0.19	0.70114	0	0
50-50	en	farahmand	glove.run3	default	250	lemma	1	0.00533	0.02745	0.02277	0.33908	0.191	0.11	0.6665	0	20	xfarahmand913	0.10235	0.10574	0.08318	0.37266	0.23748	0.23	0.70537	0	0
50-50	en	farahmand	glove.run3	default	250	lemma	4	0.02103	0.05499	0.04408	0.34836	0.2016	0.13	0.67701	0	20	xfarahmand913	0.13798	0.13871	0.10854	0.39416	0.25922	0.23	0.72778	0	0
50-50	en	farahmand	glove.run3	default	250	lemma	8	0.03551	0.07162	0.05706	0.34878	0.208	0.15	0.68145	0	20	xfarahmand913	0.16465	0.15817	0.12363	0.39531	0.27299	0.24	0.74693	0	0
50-50	en	farahmand	glove.run3	default	250	lemmapos	1	-0.00154	0.01415	0.01275	0.34258	0.18562	0.11	0.66178	5	15	xfarahmand913	0.08657	0.09051	0.07187	0.37668	0.22589	0.17	0.69118	15	0
50-50	en	farahmand	glove.run3	default	250	lemmapos	4	0.01915	0.04461	0.03662	0.34261	0.19717	0.13	0.67093	5	15	xfarahmand913	0.13198	0.12857	0.10149	0.38143	0.24827	0.21	0.71051	15	0
50-50	en	farahmand	glove.run3	default	250	lemmapos	8	0.03002	0.0631	0.05068	0.34293	0.20361	0.12	0.67497	5	15	xfarahmand913	0.1542	0.14884	0.11686	0.38864	0.26293	0.22	0.73508	15	0
50-50	en	farahmand	glove.run3	default	250	surface	1	0.02831	0.03566	0.02825	0.33161	0.19582	0.14	0.67166	0	20	xfarahmand913	0.05346	0.06046	0.04814	0.3639	0.21893	0.17	0.68665	0	0
50-50	en	farahmand	glove.run3	default	250	surface	4	0.04318	0.05547	0.0439	0.33109	0.20369	0.19	0.69418	0	20	xfarahmand913	0.07753	0.0846	0.0665	0.36527	0.23219	0.2	0.71063	0	0
50-50	en	farahmand	glove.run3	default	250	surface	8	0.05487	0.06656	0.05266	0.33066	0.2093	0.18	0.68956	0	20	xfarahmand913	0.09074	0.09617	0.07547	0.36566	0.24092	0.2	0.72018	0	0
50-50	en	farahmand	glove.run3	default	250	surface@stoppy	1	0.05495	0.06125	0.04792	0.33441	0.20476	0.17	0.67893	0	20	xfarahmand913	0.06813	0.06985	0.05457	0.37186	0.22206	0.17	0.68891	0	0
50-50	en	farahmand	glove.run3	default	250	surface@stoppy	4	0.04024	0.04136	0.0329	0.33045	0.19813	0.17	0.67513	0	20	xfarahmand913	0.05516	0.05968	0.04778	0.36364	0.2181	0.19	0.68581	0	0
50-50	en	farahmand	glove.run3	default	250	surface@stoppy	8	0.04625	0.0534	0.04228	0.32935	0.20366	0.17	0.67988	0	20	xfarahmand913	0.06256	0.07094	0.05635	0.3617	0.22386	0.17	0.69203	0	0
50-50	en	farahmand	glove.run3	default	750	lemma	1	0.00551	0.03516	0.02907	0.35071	0.19073	0.12	0.66431	0	20	xfarahmand913	0.10397	0.1159	0.09147	0.39492	0.2369	0.23	0.70064	0	0
50-50	en	farahmand	glove.run3	default	750	lemma	4	0.02924	0.07605	0.06082	0.35011	0.20438	0.12	0.67526	0	20	xfarahmand913	0.15401	0.16638	0.13052	0.3936	0.26325	0.2	0.72609	0	0
50-50	en	farahmand	glove.run3	default	750	lemma	8	0.03978	0.08701	0.06923	0.35149	0.21038	0.14	0.68223	0	20	xfarahmand913	0.17601	0.17754	0.13904	0.4026	0.27706	0.24	0.75197	0	0
50-50	en	farahmand	glove.run3	default	750	lemmapos	1	0.00279	0.02804	0.02382	0.34644	0.18805	0.1	0.66256	5	15	xfarahmand913	0.09408	0.10668	0.08475	0.38606	0.23029	0.17	0.70615	15	0
50-50	en	farahmand	glove.run3	default	750	lemmapos	4	0.02338	0.06098	0.04962	0.34995	0.20073	0.12	0.67189	5	15	xfarahmand913	0.14046	0.14669	0.11585	0.38985	0.25186	0.21	0.70636	15	0
50-50	en	farahmand	glove.run3	default	750	lemmapos	8	0.04103	0.08848	0.07103	0.35691	0.20901	0.13	0.6775	5	15	xfarahmand913	0.17394	0.17929	0.14123	0.39947	0.27051	0.25	0.73748	15	0
50-50	en	farahmand	glove.run3	default	750	surface	1	0.0271	0.03339	0.02666	0.33447	0.19447	0.15	0.66985	0	20	xfarahmand913	0.0525	0.06225	0.04969	0.36276	0.21867	0.17	0.68597	0	0
50-50	en	farahmand	glove.run3	default	750	surface	4	0.04331	0.05743	0.04546	0.33305	0.20194	0.17	0.67799	0	20	xfarahmand913	0.07857	0.09034	0.07133	0.3673	0.23009	0.19	0.71088	0	0
50-50	en	farahmand	glove.run3	default	750	surface	8	0.05925	0.08162	0.06453	0.33715	0.211	0.18	0.6904	0	20	xfarahmand913	0.09741	0.11146	0.08766	0.37099	0.24347	0.21	0.72494	0	0
50-50	en	farahmand	glove.run3	default	750	surface@stoppy	1	0.0472	0.05067	0.04009	0.33277	0.20099	0.15	0.68044	0	20	xfarahmand913	0.06013	0.0633	0.04979	0.3632	0.21854	0.16	0.6917	0	0
50-50	en	farahmand	glove.run3	default	750	surface@stoppy	4	0.03873	0.04509	0.03603	0.33191	0.19758	0.15	0.67252	0	20	xfarahmand913	0.05392	0.06477	0.05168	0.36518	0.21718	0.18	0.68198	0	0
50-50	en	farahmand	glove.run3	default	750	surface@stoppy	8	0.05455	0.0668	0.05296	0.33514	0.20514	0.15	0.67727	0	20	xfarahmand913	0.07182	0.08912	0.07053	0.36724	0.22605	0.16	0.68812	0	0
50-50	en	farahmand	glove.run3	default	500	lemma	1	0.00386	0.03038	0.02559	0.33975	0.18999	0.12	0.66387	0	20	xfarahmand913	0.10202	0.10995	0.08698	0.37968	0.23607	0.21	0.70394	0	0
50-50	en	farahmand	glove.run3	default	500	lemma	4	0.02508	0.06619	0.05329	0.34571	0.20245	0.13	0.6746	0	20	xfarahmand913	0.14601	0.15328	0.12041	0.3892	0.26011	0.2	0.72563	0	0
50-50	en	farahmand	glove.run3	default	500	lemma	8	0.03593	0.07861	0.06229	0.34742	0.20891	0.15	0.6818	0	20	xfarahmand913	0.16685	0.16583	0.12931	0.39216	0.27366	0.24	0.74932	0	0
50-50	en	farahmand	glove.run3	default	500	lemmapos	1	0.00349	0.02123	0.0182	0.3416	0.18742	0.11	0.66306	5	15	xfarahmand913	0.09425	0.09924	0.07853	0.3828	0.22992	0.18	0.70711	15	0
50-50	en	farahmand	glove.run3	default	500	lemmapos	4	0.02073	0.05439	0.04441	0.35124	0.19915	0.12	0.67128	5	15	xfarahmand913	0.13522	0.13831	0.10929	0.38989	0.2494	0.2	0.70646	15	0
50-50	en	farahmand	glove.run3	default	500	lemmapos	8	0.03424	0.07617	0.06131	0.35421	0.20649	0.12	0.67627	5	15	xfarahmand913	0.16244	0.16382	0.12912	0.39544	0.26511	0.24	0.72418	15	0
50-50	en	farahmand	glove.run3	default	500	surface	1	0.02229	0.02803	0.02242	0.33418	0.19273	0.16	0.67022	0	20	xfarahmand913	0.04717	0.05664	0.04518	0.3646	0.21708	0.18	0.68625	0	0
50-50	en	farahmand	glove.run3	default	500	surface	4	0.0434	0.05762	0.04564	0.33417	0.2031	0.18	0.67685	0	20	xfarahmand913	0.07823	0.08868	0.06996	0.36896	0.22957	0.2	0.69684	0	0
50-50	en	farahmand	glove.run3	default	500	surface	8	0.05655	0.071	0.05639	0.33223	0.21004	0.18	0.69821	0	20	xfarahmand913	0.09389	0.10438	0.0822	0.37076	0.24102	0.2	0.71736	0	0
50-50	en	farahmand	glove.run3	default	500	surface@stoppy	1	0.05147	0.05394	0.04267	0.33583	0.20067	0.15	0.68045	0	20	xfarahmand913	0.06428	0.06677	0.05211	0.37343	0.21896	0.16	0.69196	0	0
50-50	en	farahmand	glove.run3	default	500	surface@stoppy	4	0.03706	0.04104	0.03276	0.32945	0.19751	0.15	0.67229	0	20	xfarahmand913	0.05197	0.06104	0.04862	0.36121	0.21703	0.16	0.68163	0	0
50-50	en	farahmand	glove.run3	default	500	surface@stoppy	8	0.0478	0.05809	0.04625	0.33096	0.20284	0.16	0.67596	0	20	xfarahmand913	0.06455	0.07965	0.06329	0.36627	0.22344	0.16	0.68649	0	0

## Sheet: fr-ours
weight	language	dataset	model	submodel	dimensions	lemmatype	window	pearson	spearman	kendall	bf1	avgprec	prec@	ndcg	misssingle	misscompound
50-50	fr	ours	word2vec.avg	cbow	250	lemma	1	0.611193	0.6166	0.418828	0.748638	0.849762	0.885182	0.971757	0	0
50-50	fr	ours	word2vec.avg	cbow	250	lemma	4	0.563553	0.583259	0.39231	0.727463	0.833678	0.909261	0.968093	0	0
50-50	fr	ours	word2vec.avg	cbow	250	lemma	8	0.556377	0.573873	0.384019	0.72884	0.824008	0.88333	0.965823	0	0
50-50	fr	ours	word2vec.avg	cbow	250	lemmapos	1	0.594526	0.607486	0.416637	0.753922	0.844613	0.874074	0.970246	6	0
50-50	fr	ours	word2vec.avg	cbow	250	lemmapos	4	0.543758	0.564261	0.381377	0.743517	0.829278	0.88333	0.966696	6	0
50-50	fr	ours	word2vec.avg	cbow	250	lemmapos	8	0.536579	0.557297	0.377372	0.742077	0.827012	0.86667	0.966284	6	0
50-50	fr	ours	word2vec.avg	cbow	250	surface	1	0.556656	0.583147	0.39931	0.762527	0.819193	0.818521	0.963646	0	0
50-50	fr	ours	word2vec.avg	cbow	250	surface	4	0.526541	0.54803	0.370799	0.722609	0.79733	0.818521	0.958056	0	0
50-50	fr	ours	word2vec.avg	cbow	250	surface	8	0.534579	0.559669	0.379514	0.731693	0.794371	0.81667	0.957346	0	0
50-50	fr	ours	word2vec.avg	cbow	250	surface@stoppy	1	0.524922	0.527734	0.370459	0.78138	0.791436	0.76667	0.955796	10	10
50-50	fr	ours	word2vec.avg	cbow	250	surface@stoppy	4	0.511526	0.525454	0.36827	0.773112	0.780324	0.76667	0.949239	10	10
50-50	fr	ours	word2vec.avg	cbow	250	surface@stoppy	8	0.492077	0.506014	0.354572	0.769632	0.76941	0.740739	0.946191	10	10
50-50	fr	ours	word2vec.avg	cbow	750	lemma	1	0.652873	0.655246	0.451616	0.768392	0.864192	0.885182	0.974869	0	0
50-50	fr	ours	word2vec.avg	cbow	750	lemma	4	0.622217	0.624016	0.427011	0.766678	0.849888	0.875926	0.971783	0	0
50-50	fr	ours	word2vec.avg	cbow	750	lemma	8	0.617908	0.616212	0.419293	0.757893	0.845333	0.86667	0.970736	0	0
50-50	fr	ours	word2vec.avg	cbow	750	lemmapos	1	0.643326	0.649198	0.454213	0.780751	0.867736	0.892591	0.975434	6	0
50-50	fr	ours	word2vec.avg	cbow	750	lemmapos	4	0.611069	0.614167	0.423443	0.773279	0.849679	0.875926	0.971494	6	0
50-50	fr	ours	word2vec.avg	cbow	750	lemmapos	8	0.605516	0.608266	0.420107	0.763358	0.848809	0.88333	0.971301	6	0
50-50	fr	ours	word2vec.avg	cbow	750	surface	1	0.569568	0.56645	0.388258	0.766081	0.832022	0.818521	0.967194	0	0
50-50	fr	ours	word2vec.avg	cbow	750	surface	4	0.56458	0.573542	0.387653	0.758072	0.819694	0.803703	0.964276	0	0
50-50	fr	ours	word2vec.avg	cbow	750	surface	8	0.564086	0.571657	0.39016	0.752519	0.815447	0.803703	0.963154	0	0
50-50	fr	ours	word2vec.avg	cbow	750	surface@stoppy	1	0.55927	0.574649	0.405882	0.795187	0.815379	0.814818	0.962416	10	10
50-50	fr	ours	word2vec.avg	cbow	750	surface@stoppy	4	0.552043	0.58479	0.412026	0.797198	0.817802	0.818517	0.962329	10	10
50-50	fr	ours	word2vec.avg	cbow	750	surface@stoppy	8	0.529818	0.562552	0.393949	0.794822	0.805608	0.824074	0.959061	10	10
50-50	fr	ours	word2vec.avg	cbow	500	lemma	1	0.634617	0.635194	0.435411	0.776601	0.863458	0.890739	0.97468	0	0
50-50	fr	ours	word2vec.avg	cbow	500	lemma	4	0.602563	0.609304	0.415088	0.768572	0.847854	0.874074	0.971293	0	0
50-50	fr	ours	word2vec.avg	cbow	500	lemma	8	0.590053	0.594411	0.404202	0.74733	0.839501	0.890739	0.969509	0	0
50-50	fr	ours	word2vec.avg	cbow	500	lemmapos	1	0.632069	0.638063	0.442119	0.775582	0.856609	0.9	0.972829	6	0
50-50	fr	ours	word2vec.avg	cbow	500	lemmapos	4	0.58473	0.592351	0.405974	0.748008	0.84103	0.890739	0.969516	6	0
50-50	fr	ours	word2vec.avg	cbow	500	lemmapos	8	0.580388	0.59003	0.404062	0.746933	0.840721	0.9	0.969586	6	0
50-50	fr	ours	word2vec.avg	cbow	500	surface	1	0.568313	0.575106	0.395389	0.76012	0.831851	0.83333	0.966959	0	0
50-50	fr	ours	word2vec.avg	cbow	500	surface	4	0.562166	0.564834	0.38428	0.755627	0.820081	0.81667	0.964193	0	0
50-50	fr	ours	word2vec.avg	cbow	500	surface	8	0.551699	0.557383	0.377474	0.753822	0.813067	0.807409	0.96229	0	0
50-50	fr	ours	word2vec.avg	cbow	500	surface@stoppy	1	0.545484	0.55776	0.393264	0.79183	0.803869	0.792591	0.959742	10	10
50-50	fr	ours	word2vec.avg	cbow	500	surface@stoppy	4	0.532228	0.551607	0.388214	0.785534	0.799501	0.8	0.957756	10	10
50-50	fr	ours	word2vec.avg	cbow	500	surface@stoppy	8	0.512432	0.547053	0.381967	0.789178	0.792424	0.807409	0.953512	10	10
50-50	fr	ours	word2vec.avg	skipgram	250	lemma	1	0.61005	0.61472	0.417163	0.747953	0.849717	0.888887	0.97175	0	0
50-50	fr	ours	word2vec.avg	skipgram	250	lemma	4	0.56393	0.583707	0.39289	0.72993	0.834383	0.911113	0.96825	0	0
50-50	fr	ours	word2vec.avg	skipgram	250	lemma	8	0.55639	0.57309	0.383997	0.73063	0.824103	0.88333	0.96584	0	0
50-50	fr	ours	word2vec.avg	skipgram	250	lemmapos	1	0.593867	0.607397	0.41675	0.753247	0.84488	0.872223	0.970287	6	0
50-50	fr	ours	word2vec.avg	skipgram	250	lemmapos	4	0.543193	0.563073	0.38043	0.74395	0.828443	0.88333	0.966497	6	0
50-50	fr	ours	word2vec.avg	skipgram	250	lemmapos	8	0.535247	0.55569	0.376307	0.74335	0.826477	0.86667	0.966183	6	0
50-50	fr	ours	word2vec.avg	skipgram	250	surface	1	0.556077	0.57928	0.39743	0.76004	0.82045	0.822223	0.964027	0	0
50-50	fr	ours	word2vec.avg	skipgram	250	surface	4	0.525203	0.54492	0.368877	0.726997	0.80048	0.822223	0.958987	0	0
50-50	fr	ours	word2vec.avg	skipgram	250	surface	8	0.532197	0.553997	0.375643	0.73454	0.797163	0.81667	0.958107	0	0
50-50	fr	ours	word2vec.avg	skipgram	250	surface@stoppy	1	0.524427	0.527663	0.370007	0.78	0.791657	0.76667	0.955897	10	10
50-50	fr	ours	word2vec.avg	skipgram	250	surface@stoppy	4	0.510877	0.525953	0.36843	0.773167	0.780073	0.76667	0.949147	10	10
50-50	fr	ours	word2vec.avg	skipgram	250	surface@stoppy	8	0.49182	0.502553	0.352807	0.770207	0.76834	0.738887	0.945943	10	10
50-50	fr	ours	word2vec.avg	skipgram	750	lemma	1	0.65392	0.656467	0.452967	0.773477	0.866767	0.888887	0.975387	0	0
50-50	fr	ours	word2vec.avg	skipgram	750	lemma	4	0.62075	0.623107	0.425633	0.769183	0.850773	0.877777	0.97197	0	0
50-50	fr	ours	word2vec.avg	skipgram	750	lemma	8	0.617493	0.615387	0.41919	0.75774	0.84541	0.86667	0.970737	0	0
50-50	fr	ours	word2vec.avg	skipgram	750	lemmapos	1	0.644697	0.650063	0.45502	0.783183	0.868327	0.894443	0.975563	6	0
50-50	fr	ours	word2vec.avg	skipgram	750	lemmapos	4	0.611327	0.61465	0.42336	0.773587	0.850797	0.877777	0.971773	6	0
50-50	fr	ours	word2vec.avg	skipgram	750	lemmapos	8	0.604347	0.607087	0.41862	0.760923	0.848237	0.88333	0.971193	6	0
50-50	fr	ours	word2vec.avg	skipgram	750	surface	1	0.572973	0.57283	0.392493	0.768873	0.834807	0.822223	0.967833	0	0
50-50	fr	ours	word2vec.avg	skipgram	750	surface	4	0.56604	0.572827	0.38755	0.758027	0.820973	0.81111	0.964577	0	0
50-50	fr	ours	word2vec.avg	skipgram	750	surface	8	0.564607	0.57161	0.38969	0.753367	0.81733	0.81111	0.963593	0	0
50-50	fr	ours	word2vec.avg	skipgram	750	surface@stoppy	1	0.55969	0.572897	0.404977	0.79639	0.814357	0.811113	0.962187	10	10
50-50	fr	ours	word2vec.avg	skipgram	750	surface@stoppy	4	0.55154	0.58555	0.412377	0.798833	0.817747	0.82222	0.962167	10	10
50-50	fr	ours	word2vec.avg	skipgram	750	surface@stoppy	8	0.529823	0.565097	0.395437	0.793427	0.807263	0.822223	0.959593	10	10
50-50	fr	ours	word2vec.avg	skipgram	500	lemma	1	0.63514	0.635793	0.435383	0.777033	0.863813	0.888887	0.97477	0	0
50-50	fr	ours	word2vec.avg	skipgram	500	lemma	4	0.60189	0.608723	0.414513	0.768737	0.847583	0.872223	0.97124	0	0
50-50	fr	ours	word2vec.avg	skipgram	500	lemma	8	0.59022	0.594993	0.404577	0.7469	0.839363	0.888887	0.969477	0	0
50-50	fr	ours	word2vec.avg	skipgram	500	lemmapos	1	0.631887	0.63768	0.441567	0.775467	0.856707	0.9	0.972867	6	0
50-50	fr	ours	word2vec.avg	skipgram	500	lemmapos	4	0.58442	0.591473	0.405033	0.747873	0.84084	0.888887	0.969487	6	0
50-50	fr	ours	word2vec.avg	skipgram	500	lemmapos	8	0.581083	0.59045	0.404147	0.7477	0.841253	0.9	0.969707	6	0
50-50	fr	ours	word2vec.avg	skipgram	500	surface	1	0.5679	0.575077	0.395167	0.76223	0.831953	0.83333	0.966987	0	0
50-50	fr	ours	word2vec.avg	skipgram	500	surface	4	0.561347	0.564053	0.38354	0.75498	0.819823	0.81667	0.96413	0	0
50-50	fr	ours	word2vec.avg	skipgram	500	surface	8	0.551217	0.55712	0.377253	0.754557	0.81277	0.805557	0.96224	0	0
50-50	fr	ours	word2vec.avg	skipgram	500	surface@stoppy	1	0.544403	0.55777	0.393643	0.79124	0.803997	0.794443	0.959807	10	10
50-50	fr	ours	word2vec.avg	skipgram	500	surface@stoppy	4	0.531473	0.5525	0.389003	0.785003	0.800283	0.8	0.957947	10	10
50-50	fr	ours	word2vec.avg	skipgram	500	surface@stoppy	8	0.512817	0.54982	0.38366	0.789193	0.792573	0.805557	0.953467	10	10
50-50	fr	ours	word2vec.run1	cbow	250	lemma	1	0.6127	0.61763	0.41935	0.74286	0.84935	0.88333	0.97168	0	0
50-50	fr	ours	word2vec.run1	cbow	250	lemma	4	0.56029	0.58106	0.39059	0.72519	0.83276	0.9	0.9679	0	0
50-50	fr	ours	word2vec.run1	cbow	250	lemma	8	0.55518	0.57408	0.38387	0.72862	0.82349	0.88333	0.96572	0	0
50-50	fr	ours	word2vec.run1	cbow	250	lemmapos	1	0.59618	0.60762	0.41577	0.7549	0.84464	0.88333	0.97037	6	0
50-50	fr	ours	word2vec.run1	cbow	250	lemmapos	4	0.54335	0.56415	0.38082	0.7433	0.82955	0.88333	0.96674	6	0
50-50	fr	ours	word2vec.run1	cbow	250	lemmapos	8	0.53923	0.55947	0.37865	0.74046	0.82824	0.86667	0.96658	6	0
50-50	fr	ours	word2vec.run1	cbow	250	surface	1	0.55985	0.59067	0.4059	0.76667	0.82063	0.81667	0.96396	0	0
50-50	fr	ours	word2vec.run1	cbow	250	surface	4	0.52491	0.54886	0.37151	0.71861	0.79441	0.81667	0.95737	0	0
50-50	fr	ours	word2vec.run1	cbow	250	surface	8	0.53489	0.56447	0.38264	0.73626	0.7934	0.81667	0.95706	0	0
50-50	fr	ours	word2vec.run1	cbow	250	surface@stoppy	1	0.52327	0.52858	0.3697	0.78448	0.79101	0.76667	0.95552	10	10
50-50	fr	ours	word2vec.run1	cbow	250	surface@stoppy	4	0.51262	0.53421	0.37325	0.77626	0.78454	0.76667	0.95021	10	10
50-50	fr	ours	word2vec.run1	cbow	250	surface@stoppy	8	0.48893	0.50148	0.35171	0.76596	0.7667	0.73333	0.94544	10	10
50-50	fr	ours	word2vec.run1	cbow	750	lemma	1	0.65042	0.65323	0.44967	0.76471	0.86209	0.88333	0.97444	0	0
50-50	fr	ours	word2vec.run1	cbow	750	lemma	4	0.6232	0.6243	0.42739	0.76847	0.85049	0.88333	0.97193	0	0
50-50	fr	ours	word2vec.run1	cbow	750	lemma	8	0.62203	0.62215	0.42507	0.76847	0.84834	0.86667	0.97136	0	0
50-50	fr	ours	word2vec.run1	cbow	750	lemmapos	1	0.64573	0.65242	0.45677	0.77725	0.86823	0.9	0.97554	6	0
50-50	fr	ours	word2vec.run1	cbow	750	lemmapos	4	0.61165	0.61763	0.42597	0.77778	0.85096	0.88333	0.97175	6	0
50-50	fr	ours	word2vec.run1	cbow	750	lemmapos	8	0.61245	0.61492	0.42535	0.76279	0.85115	0.88333	0.97182	6	0
50-50	fr	ours	word2vec.run1	cbow	750	surface	1	0.56629	0.56115	0.38414	0.76238	0.83042	0.81667	0.96691	0	0
50-50	fr	ours	word2vec.run1	cbow	750	surface	4	0.56302	0.5738	0.38589	0.75532	0.81868	0.8	0.96409	0	0
50-50	fr	ours	word2vec.run1	cbow	750	surface	8	0.56503	0.57291	0.39077	0.75824	0.81635	0.81667	0.96333	0	0
50-50	fr	ours	word2vec.run1	cbow	750	surface@stoppy	1	0.56298	0.58156	0.40975	0.79638	0.81739	0.81667	0.96279	10	10
50-50	fr	ours	word2vec.run1	cbow	750	surface@stoppy	4	0.55406	0.58708	0.41329	0.7963	0.82221	0.83333	0.9635	10	10
50-50	fr	ours	word2vec.run1	cbow	750	surface@stoppy	8	0.53522	0.57154	0.39951	0.79279	0.80686	0.83333	0.95903	10	10
50-50	fr	ours	word2vec.run1	cbow	500	lemma	1	0.63461	0.63494	0.43331	0.78049	0.86524	0.88333	0.97509	0	0
50-50	fr	ours	word2vec.run1	cbow	500	lemma	4	0.60327	0.6098	0.4161	0.77143	0.84814	0.88333	0.97133	0	0
50-50	fr	ours	word2vec.run1	cbow	500	lemma	8	0.58767	0.59316	0.40246	0.74882	0.84024	0.88333	0.96968	0	0
50-50	fr	ours	word2vec.run1	cbow	500	lemmapos	1	0.63382	0.63917	0.44401	0.77833	0.85722	0.9	0.973	6	0
50-50	fr	ours	word2vec.run1	cbow	500	lemmapos	4	0.58685	0.59349	0.40682	0.74615	0.84178	0.88333	0.9697	6	0
50-50	fr	ours	word2vec.run1	cbow	500	lemmapos	8	0.58022	0.5887	0.40259	0.74699	0.8403	0.9	0.96951	6	0
50-50	fr	ours	word2vec.run1	cbow	500	surface	1	0.57095	0.5785	0.39799	0.76068	0.83343	0.83333	0.96733	0	0
50-50	fr	ours	word2vec.run1	cbow	500	surface	4	0.56882	0.57287	0.39109	0.7619	0.82517	0.81667	0.96547	0	0
50-50	fr	ours	word2vec.run1	cbow	500	surface	8	0.55103	0.5571	0.37696	0.75397	0.81353	0.81667	0.9624	0	0
50-50	fr	ours	word2vec.run1	cbow	500	surface@stoppy	1	0.54411	0.55215	0.38927	0.7913	0.80091	0.78333	0.95904	10	10
50-50	fr	ours	word2vec.run1	cbow	500	surface@stoppy	4	0.53173	0.54543	0.38244	0.78899	0.79924	0.8	0.95756	10	10
50-50	fr	ours	word2vec.run1	cbow	500	surface@stoppy	8	0.50996	0.53036	0.37009	0.78571	0.78958	0.8	0.9532	10	10
50-50	fr	ours	word2vec.run1	skipgram	250	lemma	1	0.61083	0.61745	0.41997	0.7551	0.85022	0.88333	0.97184	0	0
50-50	fr	ours	word2vec.run1	skipgram	250	lemma	4	0.56644	0.58501	0.39345	0.72727	0.83389	0.91667	0.96813	0	0
50-50	fr	ours	word2vec.run1	skipgram	250	lemma	8	0.55756	0.57445	0.38419	0.72727	0.82443	0.88333	0.96591	0	0
50-50	fr	ours	word2vec.run1	skipgram	250	lemmapos	1	0.59353	0.60744	0.41739	0.75362	0.84432	0.86667	0.97008	6	0
50-50	fr	ours	word2vec.run1	skipgram	250	lemmapos	4	0.54473	0.56556	0.38288	0.7433	0.82984	0.88333	0.96685	6	0
50-50	fr	ours	word2vec.run1	skipgram	250	lemmapos	8	0.53526	0.55673	0.37716	0.74242	0.82632	0.86667	0.96609	6	0
50-50	fr	ours	word2vec.run1	skipgram	250	surface	1	0.55404	0.57949	0.3946	0.76087	0.8165	0.81667	0.96295	0	0
50-50	fr	ours	word2vec.run1	skipgram	250	surface	4	0.52951	0.55031	0.37201	0.72222	0.7971	0.81667	0.95781	0	0
50-50	fr	ours	word2vec.run1	skipgram	250	surface	8	0.53665	0.56054	0.38026	0.72428	0.79255	0.81667	0.95687	0	0
50-50	fr	ours	word2vec.run1	skipgram	250	surface@stoppy	1	0.52707	0.52696	0.37167	0.77966	0.79164	0.76667	0.95597	10	10
50-50	fr	ours	word2vec.run1	skipgram	250	surface@stoppy	4	0.51108	0.5162	0.36313	0.76991	0.77636	0.76667	0.94836	10	10
50-50	fr	ours	word2vec.run1	skipgram	250	surface@stoppy	8	0.49548	0.51401	0.3592	0.77273	0.77319	0.75	0.94719	10	10
50-50	fr	ours	word2vec.run1	skipgram	750	lemma	1	0.65428	0.65604	0.45221	0.76699	0.86372	0.88333	0.97478	0	0
50-50	fr	ours	word2vec.run1	skipgram	750	lemma	4	0.6227	0.62464	0.42801	0.76238	0.8484	0.86667	0.97145	0	0
50-50	fr	ours	word2vec.run1	skipgram	750	lemma	8	0.6142	0.6111	0.41362	0.74747	0.84225	0.86667	0.97011	0	0
50-50	fr	ours	word2vec.run1	skipgram	750	lemmapos	1	0.63955	0.64511	0.45085	0.78182	0.86665	0.88333	0.9752	6	0
50-50	fr	ours	word2vec.run1	skipgram	750	lemmapos	4	0.61023	0.61022	0.421	0.76847	0.84728	0.86667	0.97096	6	0
50-50	fr	ours	word2vec.run1	skipgram	750	lemmapos	8	0.59975	0.60279	0.41635	0.76636	0.84704	0.88333	0.97089	6	0
50-50	fr	ours	word2vec.run1	skipgram	750	surface	1	0.56944	0.56537	0.38814	0.76699	0.83084	0.81667	0.96684	0	0
50-50	fr	ours	word2vec.run1	skipgram	750	surface	4	0.56468	0.574	0.38952	0.76087	0.81943	0.8	0.96416	0	0
50-50	fr	ours	word2vec.run1	skipgram	750	surface	8	0.56262	0.57045	0.39002	0.74595	0.81266	0.78333	0.96254	0	0
50-50	fr	ours	word2vec.run1	skipgram	750	surface@stoppy	1	0.55514	0.56949	0.40292	0.79279	0.81439	0.81667	0.96227	10	10
50-50	fr	ours	word2vec.run1	skipgram	750	surface@stoppy	4	0.55053	0.58174	0.41041	0.79646	0.81345	0.8	0.96132	10	10
50-50	fr	ours	word2vec.run1	skipgram	750	surface@stoppy	8	0.52441	0.55102	0.3869	0.79825	0.8027	0.81667	0.95856	10	10
50-50	fr	ours	word2vec.run1	skipgram	500	lemma	1	0.6341	0.63485	0.43754	0.77228	0.86132	0.9	0.97418	0	0
50-50	fr	ours	word2vec.run1	skipgram	500	lemma	4	0.60253	0.60939	0.41465	0.76555	0.84784	0.86667	0.97131	0	0
50-50	fr	ours	word2vec.run1	skipgram	500	lemma	8	0.59227	0.59508	0.40557	0.74627	0.8389	0.9	0.96937	0	0
50-50	fr	ours	word2vec.run1	skipgram	500	lemmapos	1	0.6305	0.63734	0.44078	0.77295	0.8559	0.9	0.97262	6	0
50-50	fr	ours	word2vec.run1	skipgram	500	lemmapos	4	0.58292	0.59209	0.40607	0.75	0.84047	0.9	0.96936	6	0
50-50	fr	ours	word2vec.run1	skipgram	500	lemmapos	8	0.57986	0.59094	0.40545	0.74611	0.84061	0.9	0.96954	6	0
50-50	fr	ours	word2vec.run1	skipgram	500	surface	1	0.56609	0.57174	0.39301	0.75745	0.83017	0.83333	0.96656	0	0
50-50	fr	ours	word2vec.run1	skipgram	500	surface	4	0.55633	0.55758	0.37821	0.75	0.81525	0.81667	0.96298	0	0
50-50	fr	ours	word2vec.run1	skipgram	500	surface	8	0.55285	0.55793	0.37821	0.75294	0.8129	0.8	0.96223	0	0
50-50	fr	ours	word2vec.run1	skipgram	500	surface@stoppy	1	0.54794	0.56336	0.39688	0.79295	0.8067	0.8	0.96038	10	10
50-50	fr	ours	word2vec.run1	skipgram	500	surface@stoppy	4	0.53348	0.55689	0.3932	0.78261	0.79898	0.8	0.95776	10	10
50-50	fr	ours	word2vec.run1	skipgram	500	surface@stoppy	8	0.51452	0.56098	0.39215	0.79263	0.79512	0.81667	0.95387	10	10
50-50	fr	ours	word2vec.run2	cbow	250	lemma	1	0.60662	0.60908	0.41217	0.7459	0.84958	0.9	0.97173	0	0
50-50	fr	ours	word2vec.run2	cbow	250	lemma	4	0.56506	0.58505	0.39463	0.73733	0.8365	0.91667	0.96872	0	0
50-50	fr	ours	word2vec.run2	cbow	250	lemma	8	0.55643	0.57074	0.38393	0.736	0.82439	0.88333	0.96589	0	0
50-50	fr	ours	word2vec.run2	cbow	250	lemmapos	1	0.59189	0.60713	0.41709	0.75122	0.84568	0.86667	0.97041	6	0
50-50	fr	ours	word2vec.run2	cbow	250	lemmapos	4	0.5415	0.55951	0.37759	0.74525	0.82594	0.88333	0.9659	6	0
50-50	fr	ours	word2vec.run2	cbow	250	lemmapos	8	0.53125	0.55087	0.37311	0.74717	0.82487	0.86667	0.96588	6	0
50-50	fr	ours	word2vec.run2	cbow	250	surface	1	0.55434	0.56768	0.39179	0.75258	0.82422	0.83333	0.96517	0	0
50-50	fr	ours	word2vec.run2	cbow	250	surface	4	0.52119	0.53559	0.36311	0.74016	0.80993	0.83333	0.96178	0	0
50-50	fr	ours	word2vec.run2	cbow	250	surface	8	0.52505	0.53698	0.36403	0.74308	0.80554	0.81667	0.96039	0	0
50-50	fr	ours	word2vec.run2	cbow	250	surface@stoppy	1	0.52294	0.52745	0.36865	0.77586	0.79232	0.76667	0.9562	10	10
50-50	fr	ours	word2vec.run2	cbow	250	surface@stoppy	4	0.50893	0.52745	0.36891	0.77333	0.77932	0.76667	0.94887	10	10
50-50	fr	ours	word2vec.run2	cbow	250	surface@stoppy	8	0.49105	0.49217	0.34751	0.77193	0.76513	0.73333	0.9452	10	10
50-50	fr	ours	word2vec.run2	cbow	750	lemma	1	0.65706	0.66013	0.45702	0.78873	0.87449	0.9	0.97694	0	0
50-50	fr	ours	word2vec.run2	cbow	750	lemma	4	0.61635	0.62038	0.4215	0.7767	0.85343	0.88333	0.97253	0	0
50-50	fr	ours	word2vec.run2	cbow	750	lemma	8	0.61625	0.61291	0.41888	0.75728	0.84564	0.86667	0.97074	0	0
50-50	fr	ours	word2vec.run2	cbow	750	lemmapos	1	0.64881	0.65266	0.45744	0.79048	0.8701	0.9	0.97595	6	0
50-50	fr	ours	word2vec.run2	cbow	750	lemmapos	4	0.6121	0.6161	0.42311	0.77451	0.85415	0.88333	0.97261	6	0
50-50	fr	ours	word2vec.run2	cbow	750	lemmapos	8	0.60084	0.60355	0.41416	0.75362	0.84652	0.88333	0.97087	6	0
50-50	fr	ours	word2vec.run2	cbow	750	surface	1	0.58319	0.59197	0.4052	0.77725	0.84316	0.83333	0.96975	0	0
50-50	fr	ours	word2vec.run2	cbow	750	surface	4	0.57042	0.57068	0.38724	0.75789	0.82481	0.83333	0.96548	0	0
50-50	fr	ours	word2vec.run2	cbow	750	surface	8	0.56617	0.57147	0.38828	0.75591	0.82298	0.83333	0.96491	0	0
50-50	fr	ours	word2vec.run2	cbow	750	surface@stoppy	1	0.56095	0.56764	0.40226	0.8	0.81129	0.8	0.9615	10	10
50-50	fr	ours	word2vec.run2	cbow	750	surface@stoppy	4	0.55003	0.58783	0.41343	0.80374	0.81758	0.83333	0.96168	10	10
50-50	fr	ours	word2vec.run2	cbow	750	surface@stoppy	8	0.52984	0.57273	0.3999	0.78924	0.81223	0.81667	0.96119	10	10
50-50	fr	ours	word2vec.run2	cbow	500	lemma	1	0.63671	0.63759	0.4353	0.77833	0.86488	0.88333	0.97504	0	0
50-50	fr	ours	word2vec.run2	cbow	500	lemma	4	0.59987	0.60698	0.41279	0.76923	0.84677	0.86667	0.97108	0	0
50-50	fr	ours	word2vec.run2	cbow	500	lemma	8	0.59072	0.59674	0.4057	0.74561	0.83895	0.88333	0.96938	0	0
50-50	fr	ours	word2vec.run2	cbow	500	lemmapos	1	0.63134	0.63653	0.43991	0.77512	0.857	0.9	0.97298	6	0
50-50	fr	ours	word2vec.run2	cbow	500	lemmapos	4	0.58349	0.58884	0.40221	0.74747	0.84027	0.88333	0.9694	6	0
50-50	fr	ours	word2vec.run2	cbow	500	lemmapos	8	0.58317	0.59171	0.4044	0.75	0.84285	0.9	0.97007	6	0
50-50	fr	ours	word2vec.run2	cbow	500	surface	1	0.56666	0.57499	0.3945	0.76856	0.83226	0.83333	0.96707	0	0
50-50	fr	ours	word2vec.run2	cbow	500	surface	4	0.55889	0.56171	0.38132	0.75304	0.81905	0.81667	0.96394	0	0
50-50	fr	ours	word2vec.run2	cbow	500	surface	8	0.54977	0.55633	0.37659	0.75676	0.81188	0.8	0.96209	0	0
50-50	fr	ours	word2vec.run2	cbow	500	surface@stoppy	1	0.54116	0.5578	0.39478	0.78947	0.80438	0.8	0.96	10	10
50-50	fr	ours	word2vec.run2	cbow	500	surface@stoppy	4	0.52921	0.55518	0.39137	0.78341	0.80263	0.8	0.95852	10	10
50-50	fr	ours	word2vec.run2	cbow	500	surface@stoppy	8	0.51397	0.55812	0.38874	0.78924	0.79302	0.8	0.95333	10	10
50-50	fr	ours	word2vec.run2	skipgram	250	lemma	1	0.60821	0.60902	0.41154	0.74872	0.85071	0.88333	0.97195	0	0
50-50	fr	ours	word2vec.run2	skipgram	250	lemma	4	0.56205	0.57952	0.38965	0.73684	0.83452	0.9	0.96836	0	0
50-50	fr	ours	word2vec.run2	skipgram	250	lemma	8	0.55417	0.56832	0.38181	0.73606	0.82492	0.88333	0.96601	0	0
50-50	fr	ours	word2vec.run2	skipgram	250	lemmapos	1	0.58467	0.59615	0.40975	0.75728	0.84116	0.88333	0.96938	6	0
50-50	fr	ours	word2vec.run2	skipgram	250	lemmapos	4	0.54024	0.55967	0.37915	0.74242	0.82696	0.86667	0.9662	6	0
50-50	fr	ours	word2vec.run2	skipgram	250	lemmapos	8	0.53574	0.55367	0.37323	0.74046	0.82749	0.88333	0.96647	6	0
50-50	fr	ours	word2vec.run2	skipgram	250	surface	1	0.55817	0.57156	0.39313	0.74459	0.8274	0.83333	0.96593	0	0
50-50	fr	ours	word2vec.run2	skipgram	250	surface	4	0.5195	0.53318	0.36104	0.73643	0.80762	0.83333	0.96106	0	0
50-50	fr	ours	word2vec.run2	skipgram	250	surface	8	0.5262	0.53776	0.36378	0.74708	0.80611	0.83333	0.96055	0	0
50-50	fr	ours	word2vec.run2	skipgram	250	surface@stoppy	1	0.53221	0.54905	0.38572	0.7897	0.7982	0.78333	0.95748	10	10
50-50	fr	ours	word2vec.run2	skipgram	250	surface@stoppy	4	0.51018	0.51957	0.36419	0.77876	0.78024	0.76667	0.94927	10	10
50-50	fr	ours	word2vec.run2	skipgram	250	surface@stoppy	8	0.48836	0.50548	0.35683	0.77119	0.77228	0.75	0.94693	10	10
50-50	fr	ours	word2vec.run2	skipgram	750	lemma	1	0.66493	0.67216	0.4664	0.79412	0.87787	0.88333	0.97771	0	0
50-50	fr	ours	word2vec.run2	skipgram	750	lemma	4	0.62078	0.62063	0.42249	0.78049	0.85379	0.88333	0.97256	0	0
50-50	fr	ours	word2vec.run2	skipgram	750	lemma	8	0.61577	0.61245	0.41938	0.75349	0.84634	0.86667	0.97095	0	0
50-50	fr	ours	word2vec.run2	skipgram	750	lemmapos	1	0.63937	0.64503	0.4516	0.78469	0.86701	0.9	0.9753	6	0
50-50	fr	ours	word2vec.run2	skipgram	750	lemmapos	4	0.60954	0.61273	0.42199	0.76471	0.85036	0.88333	0.97175	6	0
50-50	fr	ours	word2vec.run2	skipgram	750	lemmapos	8	0.60079	0.60876	0.41901	0.75862	0.84566	0.88333	0.97057	6	0
50-50	fr	ours	word2vec.run2	skipgram	750	surface	1	0.5801	0.58541	0.40172	0.76995	0.83972	0.83333	0.969	0	0
50-50	fr	ours	word2vec.run2	skipgram	750	surface	4	0.57061	0.56964	0.385	0.75648	0.82533	0.81667	0.9656	0	0
50-50	fr	ours	word2vec.run2	skipgram	750	surface	8	0.56554	0.56631	0.3855	0.7551	0.81785	0.81667	0.96349	0	0
50-50	fr	ours	word2vec.run2	skipgram	750	surface@stoppy	1	0.5571	0.56604	0.40108	0.8	0.80795	0.78333	0.96042	10	10
50-50	fr	ours	word2vec.run2	skipgram	750	surface@stoppy	4	0.54638	0.57112	0.39827	0.7913	0.81446	0.81667	0.96131	10	10
50-50	fr	ours	word2vec.run2	skipgram	750	surface@stoppy	8	0.52223	0.55439	0.38624	0.78899	0.80031	0.81667	0.95683	10	10
50-50	fr	ours	word2vec.run2	skipgram	500	lemma	1	0.63784	0.638	0.43655	0.76995	0.86377	0.88333	0.97475	0	0
50-50	fr	ours	word2vec.run2	skipgram	500	lemma	4	0.60211	0.60957	0.41341	0.76329	0.84908	0.86667	0.97155	0	0
50-50	fr	ours	word2vec.run2	skipgram	500	lemma	8	0.59954	0.60123	0.411	0.74882	0.84098	0.88333	0.96975	0	0
50-50	fr	ours	word2vec.run2	skipgram	500	lemmapos	1	0.62438	0.62774	0.43381	0.78049	0.85434	0.88333	0.97247	6	0
50-50	fr	ours	word2vec.run2	skipgram	500	lemmapos	4	0.5898	0.59814	0.40881	0.75472	0.84383	0.9	0.97014	6	0
50-50	fr	ours	word2vec.run2	skipgram	500	lemmapos	8	0.57936	0.58786	0.40204	0.74131	0.83974	0.86667	0.96934	6	0
50-50	fr	ours	word2vec.run2	skipgram	500	surface	1	0.57026	0.57762	0.39736	0.76106	0.83417	0.83333	0.96758	0	0
50-50	fr	ours	word2vec.run2	skipgram	500	surface	4	0.55609	0.56073	0.38219	0.75304	0.82009	0.8	0.96432	0	0
50-50	fr	ours	word2vec.run2	skipgram	500	surface	8	0.55304	0.55946	0.37796	0.75258	0.81457	0.8	0.96264	0	0
50-50	fr	ours	word2vec.run2	skipgram	500	surface@stoppy	1	0.54694	0.55983	0.39439	0.79295	0.80787	0.8	0.96066	10	10
50-50	fr	ours	word2vec.run2	skipgram	500	surface@stoppy	4	0.53459	0.57958	0.4045	0.7907	0.80789	0.81667	0.95898	10	10
50-50	fr	ours	word2vec.run2	skipgram	500	surface@stoppy	8	0.50907	0.54022	0.38073	0.79452	0.78676	0.8	0.95142	10	10
50-50	fr	ours	word2vec.run3	cbow	250	lemma	1	0.59795	0.60543	0.41142	0.75362	0.84855	0.86667	0.97148	0	0
50-50	fr	ours	word2vec.run3	cbow	250	lemma	4	0.5606	0.57898	0.38878	0.73733	0.8384	0.9	0.96935	0	0
50-50	fr	ours	word2vec.run3	cbow	250	lemma	8	0.55605	0.57184	0.38234	0.74219	0.82741	0.88333	0.96675	0	0
50-50	fr	ours	word2vec.run3	cbow	250	lemmapos	1	0.58068	0.59224	0.40483	0.75	0.83946	0.85	0.96922	6	0
50-50	fr	ours	word2vec.run3	cbow	250	lemmapos	4	0.54267	0.56286	0.38094	0.74131	0.83078	0.86667	0.96727	6	0
50-50	fr	ours	word2vec.run3	cbow	250	lemmapos	8	0.529	0.54707	0.36826	0.73764	0.8234	0.88333	0.96542	6	0
50-50	fr	ours	word2vec.run3	cbow	250	surface	1	0.55629	0.57001	0.39117	0.74699	0.8253	0.83333	0.9655	0	0
50-50	fr	ours	word2vec.run3	cbow	250	surface	4	0.51774	0.53153	0.35843	0.7433	0.8066	0.85	0.96056	0	0
50-50	fr	ours	word2vec.run3	cbow	250	surface	8	0.51089	0.52192	0.35122	0.75	0.8028	0.83333	0.95971	0	0
50-50	fr	ours	word2vec.run3	cbow	250	surface@stoppy	1	0.52643	0.53044	0.37206	0.7913	0.79126	0.75	0.95603	10	10
50-50	fr	ours	word2vec.run3	cbow	250	surface@stoppy	4	0.50502	0.513	0.35933	0.76923	0.77745	0.76667	0.9489	10	10
50-50	fr	ours	word2vec.run3	cbow	250	surface@stoppy	8	0.49267	0.50158	0.35224	0.76793	0.76888	0.75	0.94474	10	10
50-50	fr	ours	word2vec.run3	cbow	750	lemma	1	0.65288	0.64968	0.44874	0.77391	0.86986	0.88333	0.97607	0	0
50-50	fr	ours	word2vec.run3	cbow	750	lemma	4	0.62509	0.62564	0.42821	0.77358	0.85588	0.88333	0.97309	0	0
[truncated: 286 more rows]
